# Supplementary material for: Influence of Sex on Basal and Dickkopf-1 Regulated Gene Expression in the Bovine Morula
Source: PLoS One. 2015 Jul 21;10(7):e0133587. doi: 10.1371/journal.pone.0133587 (PMC4510475; doi:10.1371/journal.pone.0133587)
Supplement: S1 File — (XLSX) [file pone.0133587.s002.xlsx]

## Sheet: Expressed genes
Probeset ID	Gene Accession	Gene Symbol	Chromosome	P value trt	P value sex	P value interaction	LSMean CON	LSMean DKK1	LSMean FEM	LSMean MALE	LSMean Fem Con	LSMean Male Con	LSMean Fem DKK	LSMean Male DKK	Fold DKK-Con	Fold Fem-Male	Fold Fem DKK-Fem Con	Fold Male DKK-Male Con
12678583	NM_001080214.1	ETS2	chr1	0.8196	0.8213	0.293461	4.89	4.921	4.934	4.877	5.052	4.729	4.816	5.026	0.959812	0.959429	0.790491	1.1654
12821546	NM_001205310.1	FGFR2	chr26	0.0158788	0.6258	0.6044	4.711	5.069	4.923	4.857	4.697	4.724	5.149	4.989	0.952282	0.767052	1.00309	0.904052
12902461	XM_002683867	LOC100299005	chrX	0.446344	1.83434e-06	0.511544	6.9069	6.97493	7.25822	6.62361	7.19495	6.61884	7.32149	6.62837	1.04829	1.55252	1.09167	1.00663
12910493	NM_001172595	DDX3Y	chrY	0.737769	8.97113e-06	0.628405	5.73626	5.90331	4.25345	7.38612	4.2909	7.18163	4.216	7.59062	1.12276	0.114018	0.94941	1.32776
12905164	NM_001034638	RBBP7	chrX	0.33977	1.52457e-05	0.233104	9.99018	10.0603	10.2425	9.80791	10.1634	9.817	10.3217	9.79882	1.04977	1.35156	1.11599	0.987477
12906453	NM_001105455	RPL39	chrX	0.385955	1.75651e-05	0.857283	11.3589	11.4007	11.521	11.2386	11.4958	11.222	11.5462	11.2552	1.02937	1.21622	1.03549	1.02328
12908991	NM_001034561	ZDHHC9	chrX	0.763976	2.17876e-05	0.540502	7.0676	7.1022	7.41992	6.74988	7.43805	6.69715	7.40179	6.80261	1.02427	1.59112	0.975184	1.07584
12909707	NM_001099084	MORF4L2	chrX	0.883833	2.62673e-05	0.131671	9.71922	9.70588	9.97387	9.45124	9.90916	9.52929	10.0386	9.37319	0.990796	1.43658	1.09386	0.897446
12898982	BC102833	MGC127538	chr9	0.571323	2.87573e-05	0.849596	10.3926	10.4382	10.6433	10.1875	10.6129	10.1723	10.6737	10.2028	1.03216	1.37151	1.04311	1.02132
12910359	NM_001105455	RPL39	chrX	0.320462	3.13639e-05	0.573388	11.4714	11.5279	11.6575	11.3419	11.6451	11.2978	11.6699	11.386	1.03996	1.24451	1.01736	1.06306
12909023	XM_002699575	ATP11C	chrX	0.410493	3.72079e-05	0.14267	9.17133	9.07252	9.45139	8.79246	9.41067	8.932	9.49212	8.65291	0.933799	1.57892	1.05808	0.824112
12907333	NM_001033620	NDUFB11	chrX	0.487768	4.15726e-05	0.128941	10.5173	10.5575	10.695	10.3798	10.6297	10.4049	10.7603	10.3546	1.02821	1.24421	1.09475	0.965714
12910573	XM_003584317	TAF1	chrX	0.934412	4.51324e-05	0.0200084	7.21749	7.20836	7.51532	6.91053	7.37879	7.0562	7.65185	6.76487	0.99369	1.52076	1.20837	0.817149
12905773	NM_001205416	STAG2	chrX	0.100278	4.56568e-05	0.010521	8.38316	8.5359	8.70166	8.21739	8.49849	8.26783	8.90484	8.16695	1.11168	1.39888	1.32534	0.932468
12906419	NM_001145757	EIF1AY	chrY	0.771474	4.78262e-05	0.155022	5.51252	5.33433	3.76265	7.0842	4.30188	6.72317	3.22343	7.44524	0.88381	0.100026	0.473538	1.64954
12902939	NM_174611	SLC6A8	chrX	0.611607	4.90512e-05	0.724574	10.2105	10.2518	10.4501	10.0121	10.4438	9.97718	10.4565	10.0471	1.02903	1.35471	1.00884	1.04963
12903475	NM_001034307	GNL3L	chrX	0.439573	5.23282e-05	0.279827	8.6577	8.72117	8.90806	8.4708	8.83154	8.48385	8.98459	8.45775	1.04498	1.35403	1.11191	0.982072
12903084	NR_001464	XIST	chrX	0.759285	6.04554e-05	0.51762	8.26418	8.36314	9.16887	7.45845	9.01436	7.514	9.32339	7.4029	1.07101	3.27256	1.23887	0.925883
12905372	NM_001205682	UBQLN2	chrX	0.371206	6.38221e-05	0.139167	6.58334	6.74242	7.12622	6.19954	6.91214	6.25455	7.34031	6.14453	1.11657	1.9009	1.34552	0.926574
12909745	NM_001076151	WDR45	chrX	0.0448509	6.4881e-05	0.0262098	8.72506	8.56506	8.84177	8.44834	8.83174	8.61838	8.8518	8.27831	0.895024	1.31351	1.014	0.790004
12902966	NM_174685	CSTF2	chrX	0.0424258	8.228e-05	0.209191	7.64759	7.34914	7.85241	7.14433	8.09018	7.205	7.61463	7.08365	0.813126	1.63363	0.719193	0.919327
12884018	NM_001193256	PEX11G	chr7	0.0394955	9.69791e-05	0.00650942	4.99242	5.21253	5.35526	4.84969	5.09172	4.89311	5.6188	4.80626	1.16483	1.41969	1.44101	0.941578
12907565	XM_001787392	USP9X	chrX	0.460879	0.000110945	0.0769565	8.29903	8.37812	8.60455	8.07261	8.46607	8.132	8.74303	8.01321	1.05635	1.44587	1.21164	0.920965
12705690	ENSBTAT00000018443	TMEM141	chr11	0.775827	0.000117403	0.440536	5.02343	5.06352	5.39332	4.69363	5.31852	4.72833	5.46812	4.65892	1.02818	1.62416	1.10926	0.953029
12904714	NM_001113244	LAMP2	chrX	0.118915	0.000119335	0.643978	10.2579	10.3788	10.5034	10.1333	10.4257	10.0902	10.5811	10.1765	1.08738	1.29245	1.11373	1.06165
12908880	NM_001105395	DKC1	chrX	0.886572	0.000150883	0.908919	9.23791	9.24807	9.41571	9.07027	9.41471	9.06112	9.41672	9.07942	1.00706	1.27054	1.0014	1.01277
12904406	NM_001193249	ZMYM3	chrX	0.620177	0.00015976	0.24088	5.83536	5.92404	6.30971	5.44968	6.37223	5.29848	6.24719	5.60088	1.0634	1.81507	0.916978	1.23319
12700080	NM_001102497	B3GNT2	chr11	0.995439	0.000212418	0.786004	7.80166	7.80105	8.05164	7.55108	8.03743	7.56589	8.06585	7.53626	0.999577	1.41477	1.01989	0.979667
12906978	NM_001206575	KDM6A	chrX	0.527431	0.000213539	0.416734	8.19008	8.26737	8.51341	7.94404	8.42489	7.95527	8.60192	7.93281	1.05504	1.48387	1.13056	0.984557
12908026	NM_001110004	HUWE1	chrX	0.695329	0.00023863	0.138052	8.53884	8.57396	8.76357	8.34924	8.67726	8.40042	8.84987	8.29805	1.02464	1.33268	1.1271	0.931502
12909125	NM_001098070	OGT	chrX	0.138144	0.00024456	0.651937	8.74164	8.86258	8.98391	8.62031	8.90564	8.57765	9.06219	8.66297	1.08744	1.28663	1.11462	1.06092
12903024	ENSBTAT00000024883	WDR44	chrX	0.93317	0.000258181	0.373563	7.84104	7.82965	8.14711	7.52358	8.09164	7.59044	8.20258	7.45673	0.992141	1.54064	1.07993	0.911485
12792539	NM_001192386	GSC	chr21	0.000115534	0.000269491	0.363072	6.38099	6.77446	6.39719	6.75826	6.23684	6.52514	6.55753	6.99138	1.31354	0.778583	1.24893	1.3815
12902981	NM_001102477	UBA1	chrX	0.755062	0.000275655	0.526167	8.78278	8.74329	9.05135	8.47472	9.03078	8.53478	9.07192	8.41466	0.972998	1.49136	1.02893	0.92011
12895062	NM_001037616	HMGB2	chr8	0.236526	0.000329941	0.269436	7.94094	7.83864	8.07891	7.70067	8.08248	7.79941	8.07534	7.60194	0.931543	1.29975	0.995063	0.872078
12910704	ENSBTAT00000064378 // ENSBTAT00000064378 // ENSBTAT00000064378 // ENSBTAT00000064378	LOC617729 // LOC787716 // LOC786550 // LOC786530	chrX	0.753765	0.000338315	0.427957	6.22679	6.31234	6.87745	5.66168	6.72564	5.72793	7.02926	5.59543	1.0611	2.32264	1.23423	0.912249
12903495	NM_001076815	LAS1L	chrX	0.570472	0.000338361	0.489994	8.65143	8.58264	8.88629	8.34778	8.87873	8.42413	8.89384	8.27144	0.953438	1.45246	1.01053	0.899569
12904974	XM_614337	BRWD3	chrX	0.220186	0.000381429	0.0414674	7.56551	7.41543	7.75375	7.22719	7.69841	7.4326	7.80908	7.02177	0.901202	1.44049	1.07973	0.752193
12733016	NM_001205572	FAM168A	chr15	0.13311	0.000400912	0.361046	6.30853	6.0313	5.77988	6.55995	6.00086	6.6162	5.5589	6.5037	0.825175	0.582339	0.736135	0.924985
12903795	NM_001015577	APEX2	chrX	0.469032	0.000409847	0.858994	5.15397	4.96918	5.61494	4.50821	5.72982	4.57811	5.50006	4.43831	0.87978	2.15357	0.852773	0.907642
12904144	NM_001034496	FAM50A	chrX	0.689431	0.000455614	0.114071	8.45614	8.51094	8.77916	8.18791	8.86429	8.04799	8.69403	8.32784	1.03871	1.50655	0.888681	1.21407
12909257	NM_001014941	BCAP31	chrX	0.127632	0.000467284	0.334618	9.05321	8.88642	9.19707	8.74255	9.22884	8.87758	9.16531	8.60752	0.890821	1.37033	0.956921	0.829287
12903059	ENSBTAT00000016073	ATP6AP1	chrX	0.00316484	0.000482848	0.570356	8.83415	9.26629	9.322	8.77844	9.14202	8.52628	9.50198	9.03061	1.34924	1.45756	1.28339	1.41847
12688130	NM_001014386	RNASE1	chr10	0.23318	0.000487077	0.248143	9.58614	9.84159	10.1632	9.26455	10.159	9.01328	10.1674	9.51582	1.19371	1.86429	1.00581	1.41671
12906425	ENSBTAT00000063826	UTY	chrY	0.66574	0.000523467	0.980889	5.01128	4.87135	4.25387	5.62875	4.31997	5.70259	4.18777	5.55492	0.907562	0.385584	0.912442	0.902708
12903008	NM_174760	RPL10	chrX	0.527957	0.000548314	0.823187	12.101	12.1238	12.1886	12.0362	12.1731	12.0288	12.204	12.0436	1.01596	1.11136	1.02164	1.01031
12904502	NM_001075850	WDR13	chrX	0.899163	0.000556888	0.692417	5.92573	5.944	6.23944	5.63029	6.20174	5.64973	6.27714	5.61085	1.01274	1.52536	1.05365	0.973415
12691488	NM_001081737	CASC4	chr10	0.0130817	0.000563393	0.111914	6.05398	6.62632	5.90038	6.77991	5.44172	6.66624	6.35905	6.89359	1.48693	0.543545	1.88861	1.17068
12909582	NM_001193252	GPKOW	chrX	0.991502	0.000598596	0.894221	6.76495	6.76369	7.01268	6.51596	7.02118	6.50872	7.00417	6.52321	0.999126	1.41099	0.988276	1.01009
12905500	NM_001076231	HDAC8	chrX	0.889728	0.000608663	0.348445	8.73095	8.74732	8.98608	8.49219	8.9218	8.54011	9.05037	8.44427	1.01141	1.40824	1.09321	0.935729
12876544	ENSBTAT00000053293 // ENSBTAT00000053293 // ENSBTAT00000053293 // ENSBTAT00000053293 // ENSBTAT00000053293	LOC100335194 // LOC100301462 // COX7B // LOC100297586 // LOC100295347	chr7	0.562053	0.000626955	0.756046	11.4681	11.4981	11.5903	11.3758	11.5834	11.3528	11.5973	11.3988	1.02099	1.16032	1.00973	1.03238
12874611	NM_001077971	GRSF1	chr6	0.209459	0.000675323	0.0586136	8.69556	8.5706	8.4323	8.83385	8.39749	8.99363	8.46712	8.67408	0.917031	0.757045	1.04945	0.801322
12704487	NM_001192096	CAMSAP1	chr11	0.167403	0.000678193	0.848922	7.58253	7.4665	7.35604	7.69299	7.40628	7.75877	7.30579	7.62721	0.922726	0.79171	0.932713	0.912845
12905287	NM_001080308	USP11	chrX	0.462631	0.000753052	0.976302	7.14603	7.02531	7.41852	6.75282	7.47646	6.8156	7.36058	6.69005	0.919732	1.58633	0.922822	0.916652
12817854	ENSBTAT00000023384	EIF3CL	chr25	0.0715759	0.00075612	0.11982	10.6147	10.5431	10.502	10.6558	10.5682	10.6612	10.4357	10.6505	0.951602	0.898845	0.912237	0.992666
12849569	NM_001101854	RBM48	chr4	0.627624	0.000773821	0.0863523	8.72507	8.77103	8.55584	8.94026	8.44796	9.00219	8.66371	8.87834	1.03237	0.766083	1.16131	0.917738
12730785	NM_174242	APOA1	chr15	0.870881	0.000818868	0.309882	5.1046	5.03628	5.9206	4.22029	5.73784	4.47137	6.10335	3.9692	0.953743	3.24971	1.28834	0.706043
12904682	NM_001207031	MED14	chrX	0.975481	0.000832525	0.314026	7.99876	7.99428	8.2912	7.70184	8.36811	7.62941	8.21429	7.77427	0.996896	1.50457	0.898864	1.10562
12903267	NM_001038503	SSR4	chrX	0.608395	0.000976701	0.740383	11.2449	11.2763	11.3818	11.1394	11.3559	11.1338	11.4076	11.145	1.02204	1.18291	1.03652	1.00777
12769776	NM_001075546	SLC43A2	chr19	0.74856	0.00101091	0.820137	5.99847	5.94979	6.2734	5.67487	6.28049	5.71646	6.26631	5.63328	0.966822	1.51417	0.990221	0.943975
12907545	ENSBTAT00000064329	MAP7D3	chrX	0.192367	0.00101177	0.696629	8.96002	8.80269	9.11309	8.64962	9.16881	8.75123	9.05737	8.54801	0.896683	1.37886	0.925663	0.86861
12731239	ENSBTAT00000020999	C15H11orf34	chr15	0.542208	0.00101951	0.928042	5.57807	5.86227	6.63417	4.80617	6.47114	4.685	6.7972	4.92733	1.21773	3.55044	1.25359	1.1829
12718194	ENSBTAT00000022964	ACBD5	chr13	0.231113	0.00112994	0.0107797	6.89327	6.71811	6.52731	7.08407	6.81783	6.96871	6.23679	7.19944	0.88567	0.679825	0.66848	1.17343
12902909	NM_174471	TIMP1	chrX	0.480353	0.00115386	0.780945	9.61354	9.47998	9.91152	9.182	9.95216	9.27492	9.87088	9.08909	0.91158	1.65809	0.945214	0.879142
12718839	NM_001206504	RBM39	chr13	0.0667213	0.00115696	0.000168319	10.3082	10.3485	10.288	10.3687	10.218	10.3984	10.358	10.339	1.02828	0.945605	1.10186	0.959614
12688149	NM_174705	ARPP19	chr10	0.0328661	0.00122506	0.0237354	5.06421	5.23352	5.2909	5.00682	5.29681	4.8316	5.28498	5.18205	1.12452	1.21763	0.991831	1.27496
12902960	NM_174659	SLC25A5	chrX	0.631872	0.00125904	0.626571	11.0068	11.045	11.1787	10.8731	11.1402	10.8734	11.2172	10.8728	1.02685	1.23594	1.05485	0.999584
12907190	NM_174334	HSD17B10	chrX	0.136652	0.00127675	0.666905	8.69242	8.88146	9.0221	8.55178	8.95403	8.43081	9.09017	8.67274	1.14	1.38542	1.09897	1.18258
12909185	---	---	chrX	0.990629	0.00130508	0.0498005	9.69465	9.69304	9.95707	9.43062	9.81423	9.57507	10.0999	9.28617	0.998881	1.44037	1.21898	0.818524
12907392	NM_001192029	ELF4	chrX	0.0768299	0.00134683	0.40038	7.60901	7.88094	8.02344	7.46651	7.82536	7.39265	8.22151	7.54036	1.20742	1.47114	1.31599	1.10781
12910408	XM_002700035	LOC781112	chrX	0.426624	0.00138931	0.848492	6.04491	6.17291	6.41165	5.80618	6.36288	5.72695	6.46041	5.88541	1.09277	1.52147	1.06994	1.1161
12808817	NM_001080360	KCTD1	chr24	0.839424	0.00145034	0.227252	8.18475	8.20698	7.98876	8.40297	7.90989	8.45961	8.06762	8.34633	1.01552	0.75043	1.11553	0.924483
12909607	NM_001206105	KIF4A	chrX	0.895287	0.00151735	0.391713	8.17383	8.18548	8.34592	8.0134	8.37844	7.96923	8.3134	8.05757	1.00811	1.25921	0.955918	1.06315
12907479	NM_001075236	GK	chrX	0.183963	0.00154318	0.348781	8.11419	8.31039	8.48137	7.9432	8.45146	7.77691	8.51129	8.10949	1.14568	1.45213	1.04234	1.25927
12908277	NM_001034471	GDPD2	chrX	0.370436	0.00154497	0.213334	7.48664	7.59612	7.76758	7.31518	7.63586	7.33743	7.89929	7.29294	1.07883	1.36831	1.20033	0.969636
12753417	NM_001098102	SETD6	chr18	0.103165	0.00161916	0.271054	6.34451	6.51059	6.24564	6.60946	6.10783	6.58119	6.38346	6.63773	1.12201	0.777106	1.21052	1.03997
12798378	ENSBTAT00000006494	SEC61A1	chr22	0.956515	0.00164455	0.411682	9.04079	9.03581	9.20818	8.86842	9.24857	8.83302	9.1678	8.90383	0.996554	1.26555	0.945552	1.05031
12877920	NM_001098888	MED26	chr7	0.0269109	0.0016634	0.278183	5.97299	5.73422	5.66868	6.03853	5.73305	6.21293	5.60431	5.86413	0.847467	0.773864	0.914628	0.785238
12904529	NM_001031762	TMEM164	chrX	0.433948	0.00166863	0.16434	8.52789	8.39462	8.77442	8.1481	8.72005	8.33574	8.82878	7.96046	0.91176	1.54362	1.07828	0.770957
12863567	XM_002684144	LOC100297468	chr5	0.112508	0.0017265	0.85096	7.58165	7.81083	7.95251	7.43996	7.8249	7.3384	8.08013	7.54152	1.17217	1.42657	1.19353	1.15118
12781628	NM_001105370	LOC515042	chr2	0.0983405	0.00175856	0.539886	10.0151	9.88067	9.8044	10.0914	9.84763	10.1826	9.76118	10.0002	0.911035	0.819627	0.941837	0.88124
12909194	NM_001075981	MBTPS2	chrX	0.433392	0.0017761	0.995043	6.11964	5.93231	6.46218	5.58977	6.55511	5.68418	6.36924	5.49537	0.878226	1.83071	0.879122	0.877331
12802194	NM_001098993	GGNBP1	chr23	0.308357	0.00178243	0.532661	8.11186	8.22653	8.37302	7.96537	8.28094	7.94279	8.4651	7.98795	1.08272	1.32653	1.13616	1.0318
12904828	NM_001205995	WBP5	chrX	0.33359	0.00178539	0.101928	6.15511	6.39575	6.72676	5.82411	6.39704	5.91319	7.05647	5.73503	1.18152	1.86949	1.57946	0.883834
12909733	NM_001205638	OTUD5	chrX	0.64115	0.00179196	0.380499	9.22532	9.28716	9.49955	9.01294	9.52733	8.92332	9.47177	9.10256	1.0438	1.40115	0.962223	1.13229
12701930	XM_002691271	KIAA1841	chr11	0.869132	0.00185156	0.711507	5.05281	5.09256	4.63078	5.5146	4.65559	5.45003	4.60596	5.57917	1.02794	0.541929	0.966182	1.09364
12698445	NM_174130	ODC1	chr11	0.302258	0.00188115	0.953289	11.4847	11.5152	11.4468	11.5531	11.4324	11.537	11.4612	11.5692	1.02137	0.928948	1.02017	1.02258
12766503	NM_001038073	AARSD1	chr19	0.0299793	0.00192788	0.0320288	7.78612	7.68225	7.65343	7.81494	7.75658	7.81567	7.55028	7.81421	0.930529	0.894086	0.866759	0.998992
12908826	NM_001038137	MOSPD1	chrX	0.822154	0.00209171	0.406907	8.1199	8.1507	8.38228	7.88832	8.30948	7.93032	8.45508	7.84632	1.02158	1.40831	1.10619	0.943434
12765990	XM_002695632	CCL1	chr19	0.0810456	0.00213829	0.010126	4.97203	5.44166	5.66766	4.74603	5.06531	4.87875	6.27002	4.6133	1.38475	1.89426	2.30491	0.831939
12777008	NM_001031760	SLC38A11	chr2	0.223656	0.00233278	0.393882	6.36091	6.58047	6.78402	6.15736	6.59826	6.12356	6.96978	6.19115	1.16438	1.54399	1.29371	1.04797
12784569	NM_001098156	ABCB6	chr2	0.289072	0.00235824	0.913484	6.93344	7.10971	6.73157	7.31158	6.6523	7.21458	6.81083	7.40859	1.12996	0.668956	1.11615	1.14394
12907132	NM_174185	KDM5C	chrX	0.664942	0.00236237	0.61995	7.40055	7.45873	7.66744	7.19184	7.60501	7.19609	7.72986	7.18759	1.04115	1.3905	1.09039	0.994125
12748752	ENSBTAT00000032517	ZFP90	chr18	0.408409	0.00236386	0.829655	6.20202	6.29219	6.43866	6.05556	6.38196	6.02209	6.49536	6.08903	1.0645	1.30414	1.08177	1.0475
12909899	NM_001046477	MSN	chrX	0.14282	0.00237145	0.292736	8.99397	9.1861	9.31478	8.8653	9.1509	8.83705	9.47866	8.89355	1.14245	1.36555	1.25506	1.03994
12905819	NM_001081544	LDOC1	chrX	0.761901	0.00241648	0.0412302	6.17711	6.23101	6.51858	5.88953	6.29751	6.0567	6.73966	5.72236	1.03807	1.54654	1.35863	0.793147
12903920	ENSBTAT00000017618	HDAC6	chrX	0.0764188	0.00247918	0.00287226	6.35971	6.57736	6.67446	6.2626	6.36371	6.3557	6.98522	6.16949	1.16284	1.3304	1.53848	0.878912
12902874	NM_001205592	XIAP	chrX	0.607207	0.00262098	0.18768	6.98739	7.1402	7.58224	6.54534	7.3053	6.66948	7.85919	6.42121	1.11173	2.05181	1.46804	0.841905
12894025	NM_001077937	ZBTB5	chr8	0.0197442	0.00274268	0.186959	5.52826	5.07818	4.99591	5.61054	5.34075	5.71578	4.65107	5.5053	0.732002	0.653098	0.619991	0.86425
12903846	NM_001102494	CENPI	chrX	0.597659	0.0028741	0.62077	7.98156	7.90494	8.19327	7.69323	8.26747	7.69565	8.11907	7.69081	0.94828	1.41426	0.902252	0.996657
12907295	NM_001113231	TMSB4	chrX	0.311493	0.0028848	0.515735	12.018	12.0953	12.1865	11.9268	12.1724	11.8636	12.2006	11.99	1.05501	1.19719	1.01969	1.09155
12735081	ENSBTAT00000021109	UBE2J2	chr16	0.021783	0.0028914	0.592599	8.43745	8.70634	8.38611	8.75768	8.28055	8.59435	8.49167	8.92101	1.20488	0.772945	1.15759	1.25411
12795590	NM_001034468	QARS	chr22	0.157093	0.00293118	0.363283	9.15675	9.22751	9.1086	9.27566	9.09552	9.21798	9.12168	9.33334	1.05027	0.890656	1.01829	1.08324
12778566	NM_001192303	CNR2	chr2	0.033936	0.00302146	0.681267	5.84016	6.28397	6.39606	5.72806	6.21419	5.46613	6.57794	5.98999	1.36019	1.58887	1.28677	1.43779
12775963	NM_001046035	FUCA1	chr2	0.139623	0.00303038	0.258254	6.84358	6.4834	7.06775	6.25923	7.11203	6.57513	7.02347	5.94334	0.779067	1.75141	0.940458	0.645372
12731643	NM_001075431	LIN7C	chr15	0.067048	0.00303653	0.964892	8.97908	8.67571	8.55808	9.09671	8.70631	9.25184	8.40985	8.94157	0.810359	0.688426	0.814246	0.806491
12709257	NM_001075277	PSPC1	chr12	0.81962	0.0030968	0.295753	8.68688	8.6613	8.48207	8.86611	8.43521	8.93856	8.52894	8.79366	0.98242	0.766293	1.06712	0.904442
12910390	NM_001077116	TCEAL8	chrX	0.910809	0.00311243	0.620702	8.03685	8.05856	8.37934	7.71607	8.32035	7.75335	8.43833	7.67879	1.01516	1.58367	1.08521	0.949633
12910322	NM_001079630	MMGT1	chrX	0.55901	0.00314091	0.633206	7.92166	8.0392	8.3224	7.63846	8.21572	7.6276	8.42909	7.64932	1.08488	1.60652	1.15939	1.01517
12825536	BC104581	PPAPDC1B	chr27	0.000415504	0.00314918	0.958585	6.23327	6.74766	6.69175	6.28918	6.43761	6.02893	6.94588	6.54944	1.42839	1.32185	1.42234	1.43446
12746988	NM_001192610	PPTC7	chr17	0.970503	0.00319895	0.0479454	8.08788	8.094	7.80867	8.3732	7.63108	8.54467	7.98627	8.20173	1.00425	0.676178	1.27915	0.788433
12907313	NM_176640	SLC35A2	chrX	0.167558	0.00321823	0.363182	5.98881	5.80704	6.11549	5.68035	6.26522	5.7124	5.96577	5.64831	0.881622	1.35204	0.812562	0.956552
12884486	ENSBTAT00000008128	SPC24	chr7	0.454303	0.00341783	0.0408513	10.3624	10.2858	10.1526	10.4955	10.0799	10.6449	10.2254	10.3461	0.948291	0.788491	1.10618	0.812936
12852384	NM_001082472	CCDC126	chr4	0.32868	0.00342958	0.979703	7.65542	7.79787	7.48411	7.96918	7.41471	7.89613	7.55351	8.04223	1.10378	0.714463	1.10098	1.10658
12907375	NM_001007807	RNF113A	chrX	0.246974	0.00345501	0.305552	6.91074	7.21473	7.49625	6.62923	7.47813	6.34336	7.51436	6.91511	1.23455	1.82388	1.02543	1.48633
12908353	NM_001192404	MSL3	chrX	0.111869	0.00352191	0.859834	6.88219	7.18561	7.34211	6.72569	7.20658	6.55781	7.47763	6.89358	1.23406	1.53306	1.20669	1.26206
12883887	NM_001045917	DBN1	chr7	0.744235	0.00356167	0.424351	8.54879	8.51306	8.34727	8.71459	8.40925	8.68833	8.28529	8.74084	0.97554	0.775222	0.917664	1.03707
12854397	NM_001099704	ORC5	chr4	0.326993	0.00358056	0.182256	6.83122	7.0159	7.23502	6.61211	7.27002	6.39242	7.20001	6.83179	1.13657	1.53998	0.952637	1.35601
12905763	NM_001040591	AP1S2	chrX	0.282079	0.00363132	0.683394	5.50935	5.30613	5.71844	5.09704	5.85797	5.16073	5.57891	5.03334	0.868606	1.53837	0.82413	0.915482
12910733	NM_001191236	ELK1	chrX	0.749745	0.00372557	0.955018	7.46919	7.40533	7.77095	7.10356	7.80852	7.12985	7.73339	7.07727	0.956702	1.5882	0.949254	0.964208
12907686	NM_001046003	MCTS1	chrX	0.664868	0.00374762	0.821402	6.47303	6.35422	6.86977	5.95748	6.89829	6.04777	6.84125	5.86718	0.920944	1.88204	0.961237	0.88234
12904263	NM_001077934	FTSJ1	chrX	0.63328	0.00387826	0.347785	8.06093	7.96772	8.33748	7.69118	8.47677	7.6451	8.19819	7.73726	0.937435	1.56515	0.824403	1.06596
12901571	NM_001168608	ULBP21	chr9	0.606912	0.00390122	0.272604	5.23066	5.37352	5.76076	4.84342	5.53467	4.92664	5.98684	4.7602	1.1041	1.88862	1.3681	0.891041
12838832	NM_001205867	RIMS3	chr3	0.499693	0.00391161	0.774097	6.17122	6.32849	6.63338	5.86633	6.58798	5.75446	6.67877	5.9782	1.11517	1.70178	1.06495	1.16776
12902425	XM_002700117	LOC100297779	chrX	0.311324	0.00392905	0.160301	9.12984	8.95096	9.32839	8.75241	9.29186	8.96782	9.36491	8.53701	0.883387	1.49068	1.05193	0.741847
12885519	NM_001035315	SAR1B	chr7	0.393281	0.00407814	0.227919	6.91411	7.09889	6.65385	7.35915	6.69349	7.13472	6.6142	7.58358	1.13665	0.613313	0.946523	1.36496
12907438	BC102059	CXHXorf56	chrX	0.626022	0.00410197	0.965915	9.52974	9.46005	9.72954	9.26025	9.76134	9.29814	9.69773	9.22236	0.952842	1.38442	0.956871	0.94883
12805585	NM_001192368	DSP	chr23	0.453222	0.00411888	0.763082	6.86084	6.99299	6.63949	7.21434	6.59977	7.12191	6.67922	7.30677	1.09593	0.671358	1.05661	1.13671
12879603	NM_001101107	FARSA	chr7	0.00709092	0.00414777	0.114139	7.83402	8.20362	8.2189	7.81874	7.93401	7.73402	8.50378	7.90345	1.29199	1.31965	1.48429	1.12461
12892374	XM_002689482	LOC100295263	chr8	0.590322	0.00415432	0.235868	6.08215	6.18056	5.83221	6.4305	5.67269	6.49161	5.99173	6.36939	1.0706	0.660537	1.2475	0.918775
12875218	NM_001034634	RAB28	chr6	0.223435	0.00415793	0.253328	7.27053	7.50158	7.08146	7.69066	6.85786	7.68321	7.30507	7.6981	1.17369	0.655563	1.3634	1.01037
12905466	NM_001101208	PORCN	chrX	0.367093	0.00418141	0.372684	7.76635	7.97151	8.23769	7.50017	8.23647	7.29624	8.23891	7.7041	1.15281	1.66731	1.0017	1.32672
12694398	NM_001024509	PSME1	chr10	0.059383	0.00423656	0.0127276	9.45121	9.22123	9.1475	9.52494	9.42139	9.48103	8.87362	9.56884	0.852645	0.769806	0.684077	1.06275
12796682	NM_001076141	CTNNB1	chr22	0.941562	0.00425936	0.576803	8.72097	8.71295	8.53768	8.89624	8.511	8.93094	8.56435	8.86154	0.994454	0.779939	1.03767	0.953034
12838342	NM_001098025	CSDE1	chr3	0.376327	0.00426181	0.0428924	10.4889	10.5189	10.449	10.5588	10.3977	10.5801	10.5003	10.5375	1.02103	0.926714	1.07371	0.97094
12905574	NM_001101220	DYNLT3	chrX	0.456124	0.00428531	0.883872	6.37475	6.61756	7.02474	5.96757	6.87974	5.86976	7.16974	6.06539	1.1833	2.08084	1.22264	1.14523
12905482	NM_001014964	ARAF	chrX	0.971982	0.00439121	0.422002	7.11594	7.12326	7.45977	6.77942	7.37151	6.86036	7.54804	6.69848	1.00509	1.60253	1.13016	0.893862
12904355	XM_002699831	LOC520706	chrX	0.977958	0.00446171	0.436921	5.00949	5.00022	5.55124	4.45847	5.68766	4.33133	5.41483	4.58561	0.993591	2.13284	0.827695	1.19274
12908456	NM_001192435	L1CAM	chrX	0.717809	0.00464878	0.054445	5.24197	5.31262	5.5929	4.96169	5.35829	5.12565	5.82752	4.79772	1.05019	1.54887	1.38437	0.796679
12789412	NM_001100303	GLRX5	chr21	0.597366	0.00473577	0.760386	8.00416	7.93446	8.18128	7.75733	8.2362	7.77212	8.12637	7.74254	0.952834	1.34159	0.926698	0.979708
12908212	NM_001098022	ATP6AP2	chrX	0.483168	0.0047496	0.583884	9.02585	9.14543	9.3585	8.81277	9.25216	8.79954	9.46485	8.82601	1.08642	1.45976	1.15885	1.01851
12908183	ENSBTAT00000015793	HCFC1	chrX	0.929163	0.00482954	0.881033	8.62577	8.6171	8.77827	8.4646	8.7753	8.47623	8.78123	8.45297	0.994011	1.24286	1.00412	0.984007
12906065	---	---	chrX	0.0619939	0.00486586	0.678656	6.82436	7.27438	7.41548	6.68327	7.14315	6.50558	7.6878	6.86096	1.36606	1.66118	1.45867	1.27933
12904006	XM_002699982	ATRX	chrX	0.927774	0.0049576	0.0178537	9.12071	9.12971	9.28437	8.96606	9.15085	9.09056	9.41788	8.84155	1.00626	1.24687	1.20332	0.841469
12822786	NM_001038167	UBE2D1	chr26	0.863004	0.00527452	0.0191944	5.99126	5.93839	6.45124	5.47841	6.08516	5.89736	6.81733	5.05945	0.964017	1.96269	1.66114	0.559453
12863381	XM_002687909	LOC100138973	chr5	0.51553	0.00530838	0.00436939	5.54632	5.45532	5.28025	5.72139	5.09886	5.99379	5.46165	5.44899	0.93887	0.736554	1.28591	0.685489
12829208	XM_003584975	SVIP	chr29	0.218251	0.00534848	0.235063	5.69846	5.36192	5.95297	5.10741	6.28325	5.11367	5.62269	5.10115	0.791937	1.79696	0.632633	0.991356
12877974	NM_001034272	C7H1orf35	chr7	0.274713	0.00543096	0.480349	8.96715	8.83192	8.70747	9.0916	8.81829	9.11602	8.59666	9.06718	0.910523	0.766242	0.857595	0.966718
12910332	XM_002699749	LOC618023	chrX	0.723456	0.00556528	0.554612	8.50667	8.42955	8.81082	8.1254	8.78476	8.22857	8.83688	8.02222	0.947952	1.60817	1.03679	0.86673
12740874	NM_001098121	TRMT1L	chr16	0.21186	0.00575417	0.194111	7.79172	7.63247	7.51707	7.90712	7.51371	8.06974	7.52044	7.7445	0.895489	0.763104	1.00467	0.798169
12907714	NM_001038516	VBP1	chrX	0.253843	0.00577019	0.099091	10.0588	10.1877	10.2966	9.94991	10.1368	9.9808	10.4563	9.91903	1.09344	1.2716	1.24791	0.958087
12874570	NM_001099035	GSTCD	chr6	0.344146	0.00588323	0.00845368	5.09319	5.25346	5.43429	4.91237	5.10743	5.07896	5.76116	4.74577	1.1175	1.43587	1.57323	0.793781
12903951	NM_001075639	APOO	chrX	0.042045	0.00595336	0.438068	8.19164	8.55671	8.63595	8.1124	8.38772	7.99556	8.88419	8.22924	1.28795	1.43749	1.41076	1.17583
12793067	XM_002696571	IQGAP1	chr21	0.950599	0.00596897	0.313161	8.63466	8.64104	8.47728	8.79842	8.42131	8.84802	8.53326	8.74882	1.00443	0.80044	1.08069	0.933553
12908490	NM_001046223	RENBP	chrX	0.37379	0.00598416	0.988907	8.51136	8.39446	8.65519	8.25064	8.71273	8.30999	8.59764	8.19129	0.92217	1.32367	0.923324	0.921017
12903690	NM_001098937	RPS6KA3	chrX	0.96805	0.00599315	0.0986407	6.80844	6.79963	7.14687	6.46119	6.96138	6.6555	7.33236	6.26689	0.993911	1.60845	1.29324	0.763865
12855087	NM_001046380	TRA2A	chr4	0.652307	0.00604415	0.497866	9.64276	9.68492	9.51866	9.80902	9.46573	9.81978	9.57159	9.79825	1.02966	0.817703	1.07614	0.985186
12902513	NM_001244318	MAGT1	chrX	0.126694	0.00609266	0.489321	7.80165	8.02453	8.13151	7.69466	7.97113	7.63217	8.2919	7.75715	1.16706	1.35364	1.249	1.09049
12895983	ENSBTAT00000063361	LOC784731	chr8	0.471239	0.00618105	0.186849	5.92027	5.97208	6.05679	5.83555	5.98248	5.85806	6.13111	5.81305	1.03657	1.16574	1.10852	0.96928
12817378	NM_001205938	PMS2	chr25	0.139112	0.00621852	0.529049	5.61266	5.28494	5.11741	5.7802	5.21354	6.01179	5.02128	5.54861	0.796796	0.631656	0.875237	0.725385
12910154	NM_001046554	NONO	chrX	0.867027	0.00629186	0.798496	8.96053	8.93974	9.14217	8.7581	9.13671	8.78436	9.14764	8.73184	0.98569	1.30502	1.00761	0.964251
12891606	NM_001206038	DAPK1	chr8	0.604207	0.00638033	0.208891	6.05208	6.13765	6.3486	5.84113	6.19987	5.90429	6.49733	5.77797	1.06111	1.42156	1.22898	0.916165
12753001	NM_001101153	ZNF274	chr18	0.352989	0.00640898	0.0961813	5.12157	4.99226	5.26872	4.8451	5.2139	5.02923	5.32354	4.66098	0.914267	1.34128	1.07895	0.774719
12891218	NM_001204995	DNAJC25	chr8	0.287046	0.0065026	0.208023	8.38321	8.25585	8.13873	8.50032	8.12655	8.63986	8.15091	8.36078	0.915508	0.778306	1.01703	0.824119
12904135	ENSBTAT00000017091	PDZD11	chrX	0.066058	0.00652122	0.56537	9.03106	9.43593	9.55422	8.91277	9.41203	8.6501	9.69642	9.17544	1.32397	1.5599	1.21789	1.43927
12908657	NM_001205878	MED12	chrX	0.699097	0.00654574	0.99643	7.42688	7.47637	7.64801	7.25524	7.62355	7.23021	7.67247	7.28027	1.0349	1.31291	1.03449	1.03531
12903190	XM_002700082	CLCN5	chrX	0.117771	0.0065476	0.262176	7.82046	8.07079	8.18211	7.70914	8.14494	7.49598	8.21928	7.92229	1.18948	1.38797	1.05288	1.34379
12773833	BC102833	MGC127538	chr2	0.535157	0.0066129	0.328466	10.2808	10.3629	10.524	10.1197	10.4176	10.144	10.6304	10.0955	1.0586	1.32341	1.15894	0.966943
12910565	ENSBTAT00000036769 // ENSBTAT00000036769 // ENSBTAT00000036769 // ENSBTAT00000036769 // ENSBTAT00000036769	LOC785061 // LOC783372 // LOC781894 // LOC781580 // LOC614449	chrX	0.755614	0.00662805	0.293157	11.183	11.1989	11.2694	11.1125	11.2341	11.1319	11.3047	11.0931	1.01111	1.1149	1.05018	0.973485
12910487	BC149657	LOC782892	chrX	0.758607	0.00664269	0.514736	5.52727	5.60606	5.95944	5.17389	5.83608	5.21846	6.0828	5.12932	1.05613	1.72375	1.18651	0.940088
12825708	XM_003585154	ADO	chr28	0.78369	0.00673244	0.0269967	6.71446	6.68238	6.87708	6.51976	7.03296	6.39596	6.72121	6.64356	0.978015	1.28104	0.805664	1.18724
12787220	NM_001192218	DNAJC21	chr20	0.18584	0.00688566	0.523371	7.65824	7.85021	7.53901	7.96945	7.39772	7.91876	7.6803	8.02013	1.14233	0.742035	1.21637	1.07279
12909391	NM_001046406	PSMD10	chrX	0.208651	0.00691879	0.503197	8.97143	8.74443	9.12625	8.58961	9.29909	8.64377	8.95342	8.53545	0.854413	1.4506	0.786945	0.927665
12838226	NM_001083679	SMG5	chr3	0.357249	0.00693387	0.0561305	7.12939	7.26844	6.97183	7.426	7.05333	7.20545	6.89032	7.64655	1.10118	0.729929	0.893161	1.35765
12908168	NM_001046125	MAGED1	chrX	0.838676	0.00708445	0.958228	8.64471	8.67528	8.88791	8.43208	8.87656	8.41287	8.89927	8.45129	1.02141	1.37158	1.01586	1.02699
12792342	BT026180	SETD3	chr21	0.18711	0.00733486	0.543347	6.73261	6.95653	6.59523	7.09391	6.43282	7.0324	6.75763	7.15543	1.1679	0.707751	1.2525	1.08901
12849380	ENSBTAT00000014154	SND1	chr4	0.654307	0.0073972	0.65788	9.56859	9.5251	9.40077	9.69293	9.40101	9.73618	9.40053	9.64968	0.970305	0.816677	0.999665	0.941807
12865887	NM_001101993	DDX17	chr5	0.380815	0.00747915	0.388473	9.45465	9.52588	9.36935	9.61118	9.29872	9.61059	9.43999	9.61176	1.05061	0.845677	1.10288	1.00081
12882589	NM_001105481	RAB8A	chr7	0.435343	0.0075999	0.465056	8.69552	8.78364	8.57151	8.90766	8.56866	8.82239	8.57435	8.99293	1.06298	0.792152	1.00396	1.12548
12906369	NM_001105657	PIN4	chrX	0.0702633	0.00769594	0.399846	9.15483	9.44679	9.53008	9.07154	9.4492	8.86046	9.61096	9.28261	1.2243	1.37416	1.11865	1.33992
12770083	NM_001046148	PSMD11	chr19	0.0190069	0.0077438	0.991998	8.42124	8.1435	8.44439	8.12034	8.58381	8.25867	8.30498	7.98201	0.824879	1.25184	0.824259	0.825499
12903604	NM_001034363	RBM3	chrX	0.267848	0.00776961	0.901336	6.82199	7.00718	7.15994	6.66923	7.0775	6.56647	7.24237	6.77198	1.13697	1.40513	1.12107	1.15309
12696829	NM_001076199	NPTN	chr10	0.24241	0.00776974	0.239949	8.34358	8.12862	8.50543	7.96677	8.50484	8.18231	8.50602	7.75122	0.861572	1.45262	1.00082	0.741701
12735935	NM_001205865	SRGAP2	chr16	0.332987	0.00787592	0.391611	5.7233	5.56322	5.88662	5.39989	6.03726	5.40934	5.73598	5.39045	0.894974	1.40126	0.811534	0.986993
12903510	NM_001034316	RPL36A	chrX	0.294621	0.00795347	0.881672	11.9963	12.0339	12.0677	11.9625	12.0515	11.9411	12.0839	11.984	1.02641	1.07564	1.02269	1.03016
12907514	NM_001035031	APOOL	chrX	0.816383	0.00806126	0.465211	7.28958	7.23358	7.62026	6.9029	7.55952	7.01963	7.681	6.78617	0.961931	1.64417	1.08785	0.85059
12908645	NM_001075811	TFE3	chrX	0.876818	0.00811596	0.49748	6.19867	6.22329	6.44707	5.97489	6.38051	6.01684	6.51364	5.93295	1.01721	1.3872	1.09667	0.943508
12890349	NM_001205811	ZNF462	chr8	0.703023	0.00821131	0.3848	5.08684	5.17351	5.46686	4.79349	5.32375	4.84992	5.60997	4.73705	1.06192	1.5948	1.21944	0.924749
12909928	NM_001046488	TIMM17B	chrX	0.29649	0.00830594	0.11849	9.30619	9.52049	9.71219	9.11449	9.76883	8.84354	9.65554	9.38544	1.16015	1.51329	0.924479	1.45589
12844912	NM_001192426	PPOX	chr3	0.159485	0.00848141	0.70467	6.19929	6.00115	5.89879	6.30165	6.02377	6.37481	5.77381	6.22849	0.871669	0.756357	0.840915	0.903548
12716361	ENSBTAT00000024348	SEC23B	chr13	0.575707	0.0085584	0.195169	7.89095	7.81796	7.6631	8.04581	7.78596	7.99594	7.54023	8.09568	0.950663	0.766995	0.843389	1.07158
12779964	NM_001205491	MARCH4	chr2	0.420641	0.00857095	0.588013	5.12934	5.08068	5.01687	5.19315	5.05747	5.20121	4.97627	5.1851	0.966838	0.884978	0.945274	0.988894
12908327	NM_001034480	TIMM8A	chrX	0.647732	0.00860778	0.672342	10.0981	10.1556	10.3118	9.94188	10.2564	9.93973	10.3672	9.94403	1.0407	1.29229	1.07984	1.00299
12908222	NM_001083680	PCSK1N	chrX	0.145379	0.0087278	0.17514	6.18045	6.02393	6.25486	5.94952	6.40566	5.95524	6.10406	5.9438	0.897189	1.23571	0.811356	0.992103
12906927	XM_002699838	TBC1D8B	chrX	0.202308	0.00879941	0.0220452	6.65765	6.18607	6.95075	5.89297	6.7369	6.5784	7.16459	5.20754	0.721172	2.08171	1.34508	0.386662
12904449	NM_001105458	RNF219	chrX	0.139562	0.00884737	0.999557	5.92148	5.57698	6.07934	5.41912	6.25165	5.5913	5.90703	5.24693	0.787581	1.58033	0.787513	0.787649
12841178	NM_001040580	ING5	chr3	0.975799	0.00896522	0.997639	5.07174	5.0793	4.71055	5.44049	4.70713	5.43634	4.71396	5.44464	1.00526	0.602928	1.00474	1.00577
12909970	NM_001192852	ATP7A	chrX	0.640301	0.00897673	0.701364	5.76387	5.83023	6.00411	5.58999	5.99813	5.52961	6.01009	5.65036	1.04707	1.33249	1.00833	1.0873
12800235	ENSBTAT00000022233	KIAA1143	chr22	0.13011	0.00913754	0.556711	7.98181	8.19494	8.28633	7.89043	8.13967	7.82396	8.43298	7.95691	1.1592	1.31576	1.22544	1.09653
12908013	NM_001035103	ALAS2	chrX	0.768368	0.0091821	0.424458	5.09499	5.14118	5.34641	4.88976	5.26013	4.92986	5.43268	4.84967	1.03253	1.37234	1.12705	0.945936
12774529	ENSBTAT00000022375	FABP3	chr2	0.423566	0.00926291	0.0906887	10.6371	10.694	10.7679	10.5632	10.8018	10.4724	10.734	10.6539	1.0402	1.15249	0.954105	1.13405
12910088	NM_001076313	IDH3G	chrX	0.920578	0.00928973	0.725881	8.07598	8.05655	8.34969	7.78284	8.32519	7.82676	8.37419	7.73892	0.986628	1.48128	1.03455	0.940928
12786060	XM_002696374	C20H5orf42	chr20	0.389789	0.00929053	0.820613	5.47128	5.56262	5.36422	5.66967	5.33046	5.61209	5.39798	5.72725	1.06536	0.809188	1.04792	1.08309
12907627	NM_001206697	THOC2	chrX	0.162259	0.009318	0.999528	7.78366	8.01606	8.1342	7.66551	8.01805	7.54926	8.25036	7.78176	1.17479	1.38385	1.17471	1.17487
12697339	XM_002691111	EFCAB11	chr10	0.276055	0.00932012	0.0382055	5.47686	5.7267	5.27449	5.92906	4.89935	6.05436	5.64963	5.80377	1.18908	0.635262	1.68212	0.840552
12905621	NM_001076285	HMGB3	chrX	0.538396	0.00932371	0.576682	5.16988	5.0933	5.31151	4.95166	5.3845	4.95525	5.23852	4.94808	0.948304	1.28329	0.903761	0.995043
12910124	NM_001078043	ZNF75D	chrX	0.134588	0.00945912	0.829254	6.43983	6.06963	6.60092	5.90854	6.81177	6.0679	6.39007	5.74918	0.773671	1.61595	0.746543	0.801785
12909324	NM_001206065	POLA1	chrX	0.963458	0.00957948	0.226718	7.08296	7.07526	7.32266	6.83556	7.22242	6.94351	7.4229	6.72761	0.994673	1.40162	1.14909	0.86101
12816376	NM_001166607	C25H7orf59	chr25	0.416327	0.00958554	0.0926837	8.0417	7.89284	8.22961	7.70492	8.46355	7.61984	7.99567	7.79	0.901964	1.43862	0.723028	1.12518
12831157	NM_001102093	C29H11orf2	chr29	0.195652	0.00968315	0.608135	5.76401	5.91707	5.67415	6.00694	5.56799	5.96004	5.78032	6.05383	1.11192	0.794003	1.15856	1.06716
12907940	NM_001101934	PDK3	chrX	0.845348	0.00979254	0.695185	7.73081	7.69793	7.95739	7.47135	7.94074	7.52087	7.97403	7.42183	0.97747	1.40059	1.02334	0.933654
12746166	NM_001015559	PHF17	chr17	0.322289	0.00990089	0.260798	7.27319	7.09265	6.92436	7.44149	7.11765	7.42872	6.73106	7.45425	0.882377	0.698761	0.764934	1.01785
12910670	ENSBTAT00000026492	ZNF280C	chrX	0.59851	0.0100208	0.698351	5.29396	5.44473	5.77905	4.95964	5.6483	4.93962	5.9098	4.97965	1.11016	1.76469	1.19873	1.02813
12864801	ENSBTAT00000026875	C5H12orf10	chr5	0.320409	0.0100806	0.656897	7.25752	7.44319	7.08629	7.61443	6.95248	7.56257	7.2201	7.66628	1.13734	0.693449	1.20382	1.07454
12730126	NM_001078102	DNAJC24	chr15	0.359638	0.0101325	0.915044	7.84798	7.71839	7.98341	7.58296	8.05565	7.64031	7.91117	7.52561	0.914091	1.31992	0.904705	0.923575
12759194	NM_001080318	PEPD	chr18	0.784963	0.0101386	0.418433	8.42414	8.39674	8.26651	8.55437	8.23919	8.6091	8.29383	8.49964	0.98118	0.819117	1.0386	0.926939
12903714	NM_001035097	TSR2	chrX	0.940405	0.0104435	0.562262	7.97545	7.96533	8.16343	7.77735	8.12909	7.8218	8.19777	7.7329	0.993016	1.30683	1.04875	0.940241
12906573	NR_031127	MIR105B	chrX	0.916205	0.010483	0.993441	5.66276	5.67938	5.89644	5.4457	5.88878	5.43674	5.9041	5.45466	1.01159	1.36674	1.01068	1.0125
12788655	NM_001242585	PNN	chr21	0.216401	0.0105151	0.0728186	9.25984	9.37791	9.18601	9.45174	9.03888	9.4808	9.33313	9.42269	1.08528	0.831774	1.22625	0.960525
12781910	NM_001205493	ZAK	chr2	0.101663	0.0105693	0.221375	6.27494	6.46774	6.21069	6.532	6.18493	6.36496	6.23645	6.69904	1.14298	0.800345	1.03636	1.26057
12754311	NM_001076998	RPL13A	chr18	0.66792	0.0106508	0.277166	12.1035	12.115	12.0713	12.1473	12.0803	12.1268	12.0623	12.1678	1.008	0.948695	0.987542	1.02887
12812929	NM_001205874	CRAMP1L	chr25	0.767131	0.010733	0.836057	5.74855	5.78536	5.94335	5.59056	5.91209	5.58501	5.97461	5.59611	1.02584	1.27703	1.04429	1.00773
12841469	NM_001206291	SFPQ	chr3	0.891168	0.0107393	0.454883	9.34773	9.33965	9.25989	9.42749	9.24169	9.45376	9.27809	9.40122	0.99442	0.890321	1.02555	0.964233
12684080	NM_001035055	CLDN11	chr1	0.288312	0.0107988	0.442911	4.98531	4.88421	4.80204	5.06748	4.81638	5.15423	4.7877	4.98072	0.932324	0.831947	0.980319	0.886679
12813124	ENSBTAT00000021549	ZNF394	chr25	0.812884	0.010825	0.432348	8.60934	8.64382	8.83306	8.42009	8.87353	8.34516	8.7926	8.49503	1.02418	1.33142	0.945454	1.10947
12699959	NM_001075667	SLC27A4	chr11	0.477857	0.0108284	0.325655	6.85427	6.96973	7.14095	6.68304	7.16377	6.54476	7.11814	6.82132	1.08332	1.37355	0.968864	1.2113
12698041	---	---	chr11	0.430542	0.010924	0.922641	7.07971	7.03546	7.13633	6.97885	7.15575	7.00367	7.1169	6.95402	0.969795	1.11534	0.97343	0.966174
12869006	NM_001102325	ATF7IP	chr5	0.897009	0.0110065	0.656102	8.72303	8.73752	8.88857	8.57198	8.85634	8.58973	8.9208	8.55424	1.01009	1.24538	1.04569	0.975701
12694248	NM_001037320	SORD	chr10	0.0366118	0.0111922	0.650532	9.11841	9.34472	9.08934	9.37378	8.99909	9.23772	9.17959	9.50984	1.16984	0.821059	1.13327	1.20758
12760122	XM_001256097	LOC789309	chr18	0.584761	0.0112205	0.307216	6.62106	6.78553	6.28082	7.12577	6.3541	6.88802	6.20754	7.36351	1.12075	0.556732	0.903398	1.3904
12907204	NM_174433	PRDX4	chrX	0.18582	0.0112229	0.893728	8.72475	8.95426	9.07733	8.60168	8.95131	8.49819	9.20336	8.70517	1.17244	1.39055	1.19089	1.15427
12903682	NM_001025329	EIF1AX	chrX	0.396184	0.011316	0.048284	11.176	11.1426	11.214	11.1045	11.1898	11.1621	11.2383	11.0469	0.977133	1.07887	1.03417	0.923244
12847098	XM_002686232	CCDC18	chr3	0.832151	0.0114401	0.00371824	6.46527	6.49812	6.26397	6.69943	5.9889	6.94164	6.53903	6.45721	1.02303	0.739458	1.46422	0.714778
12861575	NM_001076116	FAM60A	chr5	0.624861	0.0116594	0.640613	11.525	11.4873	11.3983	11.614	11.3992	11.6509	11.3974	11.5771	0.974156	0.861134	0.998807	0.950112
12878231	ENSBTAT00000028682	DDX46	chr7	0.111109	0.0118592	0.795012	8.91864	9.04311	8.87612	9.08562	8.80414	9.03314	8.94811	9.13811	1.09011	0.864837	1.10494	1.07547
12743008	XM_002694632	DEPDC5	chr17	0.54283	0.0118961	0.818418	5.35246	5.43781	5.20042	5.58984	5.14173	5.56318	5.25912	5.6165	1.06095	0.763437	1.08477	1.03765
12766882	ENSBTAT00000027078 // ENSBTAT00000027078	LOC100336833 // AP2B1	chr19	0.818816	0.0120282	0.90255	9.34394	9.31569	9.15808	9.50155	9.16466	9.52321	9.15151	9.47988	0.980612	0.788148	0.990922	0.97041
12837170	NM_001101882	INPP5D	chr3	0.98978	0.0121127	0.176421	5.69562	5.69714	5.86189	5.53087	5.77836	5.61288	5.94542	5.44886	1.00106	1.2579	1.12277	0.892539
12682512	ENSBTAT00000014796	FAM162A	chr1	0.150712	0.0121181	0.685305	8.86291	9.06029	8.77668	9.14651	8.65101	9.07481	8.90236	9.21822	1.14661	0.773874	1.19031	1.10451
12877903	NM_001105338	RARS	chr7	0.410784	0.012119	0.396834	9.18973	9.2398	9.13094	9.29859	9.0801	9.29936	9.18178	9.29782	1.03532	0.89029	1.07302	0.998931
12803331	NM_001076204	RDBP	chr23	0.777616	0.0122144	0.402257	7.73221	7.76924	7.56867	7.93278	7.60562	7.8588	7.53172	8.00676	1.026	0.776947	0.950067	1.108
12907613	NM_001034299	PGK1	chrX	0.988671	0.012412	0.8655	8.69361	8.69535	8.86443	8.52454	8.85317	8.53405	8.87568	8.51502	1.00121	1.26566	1.01573	0.986895
12798151	NM_001102480	TMEM43	chr22	0.125283	0.0128601	0.15479	5.00922	5.2151	4.93403	5.2903	4.92612	5.09232	4.94193	5.48827	1.15339	0.781183	1.01102	1.3158
12794939	NM_001100318	C22H3orf62	chr22	0.0532391	0.0130195	0.138211	5.98738	6.41375	5.91524	6.48589	5.54266	6.4321	6.28781	6.53968	1.34385	0.673313	1.67615	1.07742
12688979	NM_001166302	ZC3H14	chr10	0.967799	0.0130664	0.787142	9.04033	9.04281	8.95689	9.12625	8.96398	9.11667	8.94981	9.13582	1.00173	0.889242	0.990226	1.01336
12814086	NM_001206327	TNFRSF12A	chr25	0.563568	0.0130665	0.965459	7.37659	7.45859	7.61164	7.22354	7.5737	7.17948	7.64958	7.26759	1.05848	1.30867	1.054	1.06298
12708721	ENSBTAT00000007466	UBAC2	chr12	0.411953	0.0133219	0.479375	5.45075	5.66087	5.20884	5.90277	5.1941	5.70739	5.22359	6.09815	1.15679	0.618169	1.02065	1.31108
12832033	NM_001076521	PHLDA2	chr29	0.240418	0.0135879	0.23923	5.4659	5.21605	5.62506	5.0569	5.62473	5.30708	5.62539	4.80671	0.840983	1.48263	1.00046	0.706928
12855544	NM_001046483	WDR91	chr4	0.357389	0.0136198	0.74656	5.30335	5.17283	5.04723	5.42895	5.08985	5.51685	5.00461	5.34104	0.913499	0.767523	0.94263	0.885268
12903657	NM_001075484	MPP1	chrX	0.539725	0.0136554	0.188983	7.49161	7.36864	7.70193	7.15832	7.89804	7.08518	7.50582	7.23146	0.918293	1.45762	0.761957	1.10671
12901845	NM_001113231	TMSB4	chrU_7180001786367	0.403841	0.0137029	0.311303	11.7924	11.8962	12.0118	11.6767	12.0232	11.5616	12.0004	11.7919	1.07459	1.26145	0.984345	1.1731
12764421	NM_001103279	C19H17orf48	chr19	0.269776	0.0137066	0.284244	6.37536	6.23082	6.4781	6.12808	6.62041	6.13031	6.33579	6.12586	0.904668	1.27458	0.820953	0.99692
12907364	ENSBTAT00000025754	IL13RA1	chrX	0.304981	0.0138677	0.413248	6.08493	5.84816	6.27515	5.65794	6.29969	5.87016	6.25061	5.44571	0.848645	1.53391	0.966548	0.745124
12742772	NM_001193101	GIT2	chr17	0.382172	0.0138954	0.639702	7.38512	7.53439	7.2304	7.68911	7.19539	7.57485	7.2654	7.80337	1.109	0.727633	1.04972	1.17163
12905075	ENSBTAT00000024296	OCRL	chrX	0.172588	0.0140223	0.314239	6.24474	6.54844	6.68984	6.10334	6.64849	5.84098	6.73118	6.36569	1.2343	1.5016	1.05899	1.43864
12879396	NM_001193018	GIPC1	chr7	0.263114	0.0140657	0.540181	5.86482	5.69705	5.58162	5.98025	5.62024	6.10941	5.543	5.85109	0.890213	0.75858	0.947873	0.836061
12684153	NM_001101067	UBA5	chr1	0.606067	0.0141173	0.285788	7.24742	7.36461	6.99925	7.61278	6.81765	7.67719	7.18086	7.54836	1.08462	0.653599	1.28628	0.914578
12782904	NM_001083722	RPS6KA1	chr2	0.791681	0.0142337	0.202688	7.88335	7.84173	7.64948	8.0756	7.56738	8.19932	7.73159	7.95187	0.971565	0.744263	1.12056	0.842383
12888968	ENSBTAT00000003573	LOC100337045	chr8	0.100888	0.0143249	0.254859	7.39888	7.66102	7.73676	7.32315	7.51677	7.28099	7.95674	7.3653	1.19925	1.33202	1.35657	1.06018
12797841	XM_002696869	ULK4	chr22	0.579289	0.0143742	0.861993	5.40362	5.47605	5.61551	5.26416	5.5906	5.21664	5.64042	5.31168	1.05149	1.27575	1.03514	1.0681
12907898	NM_001192962	DDX3X	chrX	0.546645	0.014466	0.481433	9.95753	10.0057	10.089	9.87432	10.0366	9.87842	10.1413	9.87021	1.03398	1.16041	1.07522	0.994323
12748128	ENSBTAT00000023779	ZMAT5	chr17	0.991838	0.0144962	0.0971116	6.67309	6.67484	6.44238	6.90555	6.59039	6.75579	6.29438	7.05531	1.00122	0.725393	0.814499	1.23074
12823988	NM_001098027	SGK196	chr27	0.359706	0.0145184	0.529883	6.7095	6.52524	6.34964	6.88509	6.37904	7.03995	6.32025	6.73023	0.880104	0.689944	0.960071	0.806797
12905630	NM_001101226	CDK16	chrX	0.439163	0.0145821	0.752466	7.50453	7.61276	7.74541	7.37188	7.66941	7.33965	7.82141	7.40411	1.0779	1.29552	1.11111	1.04569
12836630	ENSBTAT00000009896	ADAR	chr3	0.243193	0.0146367	0.896901	6.1424	5.93141	6.27513	5.79868	6.39208	5.89271	6.15818	5.70465	0.863947	1.39131	0.850328	0.877783
12833369	ENSBTAT00000050603	MGC139603	chr29	0.592529	0.0147111	0.506609	8.39734	8.49264	8.68353	8.20645	8.69516	8.09952	8.6719	8.31337	1.06828	1.39192	0.984009	1.15978
12908007	NM_001075538	RAB9A	chrX	0.54177	0.0147123	0.489827	5.43865	5.62199	5.93231	5.12833	5.7367	5.14059	6.12791	5.11607	1.13551	1.74591	1.31149	0.983145
12754748	ENSBTAT00000028741 // ENSBTAT00000028741	PLEKHG4 // PLEKHG4	chr18	0.0370273	0.0147174	0.419295	5.38298	5.16758	5.14586	5.4047	5.2928	5.47315	4.99892	5.33625	0.861312	0.835759	0.815702	0.909472
12850270	NM_001037466	SSBP1	chr4	0.436144	0.0147185	0.545844	11.0077	11.0524	10.9535	11.1066	10.9139	11.1015	10.9932	11.1117	1.03149	0.89933	1.05649	1.00707
12717939	NM_173995	ATRN	chr13	0.621839	0.014869	0.272964	6.78399	6.86516	7.04474	6.60441	6.91256	6.65543	7.17693	6.55338	1.05787	1.35692	1.20111	0.931713
12782160	BC149932	GTF3C3	chr2	0.905257	0.0148976	0.764174	5.84168	5.8626	6.08807	5.61622	6.05121	5.63215	6.12492	5.60028	1.0146	1.38688	1.05241	0.978152
12794153	NM_001191367	PRKAR2A	chr22	0.353033	0.0150223	0.098437	9.83022	9.76984	9.71406	9.886	9.68886	9.97158	9.73925	9.80042	0.959009	0.887645	1.03554	0.888131
12718044	ENSBTAT00000023246	GNAS	chr13	0.6265	0.0151699	0.907493	8.89823	8.94496	8.79358	9.04961	8.77578	9.02069	8.81138	9.07853	1.03292	0.837388	1.02499	1.04091
12776770	ENSBTAT00000055538	MCM6	chr2	0.607335	0.0151769	0.946946	10.0142	10.0496	9.94019	10.1236	9.92478	10.1037	9.95559	10.1436	1.02482	0.880603	1.02158	1.02806
12684912	ENSBTAT00000065808	LOC518139	chr1	0.57075	0.0151946	0.23968	9.37113	9.28867	9.1363	9.52351	9.09054	9.65172	9.18205	9.39529	0.944447	0.764606	1.06549	0.837158
12682937	XM_002685064	LOC100295034	chr1	0.619223	0.0151981	0.780071	6.46773	6.53828	6.3138	6.69221	6.25875	6.6767	6.36884	6.70772	1.05012	0.769282	1.0793	1.02173
12709536	NM_001083416	EFHA1	chr12	0.553432	0.0152424	0.943249	8.57006	8.63058	8.46452	8.73612	8.43787	8.70224	8.49116	8.76999	1.04284	0.8284	1.03763	1.04808
12816560	NM_001192346	WBSCR16	chr25	0.718329	0.0152509	0.523655	6.19766	6.25563	6.01221	6.44108	6.0347	6.36063	5.98972	6.52153	1.041	0.742843	0.969306	1.11799
12815709	NM_001076808	SPNS1	chr25	0.544566	0.0153258	0.538636	8.13422	8.21152	8.3423	8.00343	8.34288	7.92556	8.34173	8.08131	1.05504	1.26477	0.999199	1.11401
12910742	NM_001083794	FAM122B	chrX	0.310248	0.01538	0.529513	5.63763	5.3833	5.8396	5.18132	5.88878	5.38648	5.79043	4.97616	0.838373	1.5782	0.934104	0.752454
12889007	NM_173902	CLU	chr8	0.301405	0.0155765	0.653675	6.09052	6.38598	6.61259	5.8639	6.40162	5.77942	6.82357	5.94839	1.22728	1.68027	1.33974	1.12425
12908136	NM_001046117	EIF2S3	chrX	0.237366	0.0155979	0.64029	9.47694	9.63112	9.72392	9.38413	9.67675	9.27714	9.7711	9.49113	1.11279	1.26557	1.06759	1.1599
12698971	NM_001193017	ZAP70	chr11	0.695225	0.0157048	0.136305	7.03741	7.00052	7.14391	6.89403	7.23488	6.83995	7.05293	6.94811	0.974754	1.18911	0.881512	1.07786
12783509	ENSBTAT00000053398	UBXN10	chr2	0.320624	0.0159426	0.405612	5.52762	5.58002	5.48493	5.62271	5.4369	5.61834	5.53297	5.62707	1.03699	0.908921	1.06886	1.00607
12715473	BC134711	CALML5	chr13	0.183967	0.0160356	0.175229	6.13129	6.27596	6.0634	6.34385	5.91718	6.3454	6.20963	6.34229	1.10548	0.823338	1.22472	0.997847
12835559	---	---	chr3	0.865453	0.0160564	0.794728	5.4518	5.46889	5.32677	5.59392	5.33136	5.57224	5.32219	5.61559	1.01192	0.830962	0.993664	1.03051
12809788	ENSBTAT00000048179	IMPACT	chr24	0.473356	0.0160598	0.74135	6.53128	6.66801	6.34911	6.85018	6.24948	6.81308	6.44874	6.88728	1.09941	0.706582	1.14811	1.05278
12693777	NM_001045877	BMP4	chr10	0.00428642	0.0160614	0.830665	5.62954	6.1407	5.67827	6.09196	5.4394	5.81968	5.91714	6.36425	1.42519	0.750698	1.39256	1.45859
12898092	XM_002690294	UTRN	chr9	0.662156	0.0162082	0.975634	6.6609	6.72145	6.50846	6.87389	6.47607	6.84573	6.54084	6.90206	1.04286	0.776233	1.04592	1.03982
12889215	NM_001034043	GULO	chr8	0.419014	0.0162503	0.479402	7.04571	6.86173	7.25151	6.65593	7.4238	6.66761	7.07922	6.64425	0.880275	1.51108	0.787533	0.983939
12808655	NM_001101239	GRP	chr24	0.584326	0.0164265	0.590046	7.31189	7.42961	7.65326	7.08823	7.65236	6.97142	7.65417	7.20505	1.08502	1.47942	1.00125	1.17579
12902320	---	---	chrX	0.485171	0.0164484	0.587436	7.48836	7.62714	7.81794	7.29756	7.80232	7.1744	7.83356	7.42071	1.10097	1.43434	1.02189	1.18617
12909544	BC151816	ACSL4	chrX	0.922506	0.0167567	0.701851	7.54054	7.52749	7.71035	7.35768	7.74262	7.33847	7.67809	7.37689	0.990994	1.27693	0.956259	1.02699
12710115	NM_001080296	CLYBL	chr12	0.653872	0.0167907	0.286553	5.75012	5.64018	6.0163	5.37401	6.2039	5.29634	5.82869	5.45167	0.926627	1.5608	0.770991	1.11368
12905566	NM_001102262	FMR1NB	chrX	0.648485	0.0169255	0.375841	6.57973	6.45996	6.8634	6.17629	6.80587	6.35358	6.92094	5.99899	0.920339	1.61006	1.08302	0.782092
12856944	NM_174274	DNAJC14	chr5	0.191224	0.0169261	0.452261	8.42304	8.61818	8.71117	8.33005	8.66869	8.17739	8.75366	8.4827	1.14484	1.30236	1.06067	1.23568
12906243	NM_001099202	CT47B1	chrX	0.60256	0.0170464	0.663755	5.6173	5.52778	5.79682	5.34826	5.87889	5.3557	5.71475	5.34082	0.93984	1.36467	0.892457	0.989739
12891826	XM_002689673	KIAA1045	chr8	0.839029	0.0170877	0.248597	5.04327	5.01225	5.22763	4.82788	5.33309	4.75344	5.12218	4.90232	0.978729	1.31928	0.863992	1.1087
12877926	NM_001101871	EPS15L1	chr7	0.952532	0.0172255	0.264756	7.38977	7.37989	7.16761	7.60205	7.07807	7.70148	7.25716	7.50262	0.99317	0.739983	1.13217	0.871235
12683135	ENSBTAT00000020266	LOC100337136	chr1	0.386857	0.0172404	0.929655	10.6052	10.6907	10.7755	10.5203	10.7285	10.4819	10.8226	10.5587	1.06104	1.19354	1.0674	1.05472
12812413	ENSBTAT00000013207	DNAJA3	chr25	0.909418	0.0173124	0.1199	7.61109	7.60073	7.7249	7.48691	7.80374	7.41844	7.64607	7.55538	0.992842	1.17935	0.896473	1.09957
12869707	ENSBTAT00000055276 // ENSBTAT00000055276	LOC100337062 // PTPN13	chr6	0.0992595	0.0174513	0.802557	9.06213	9.25368	9.01285	9.30296	8.90317	9.2211	9.12254	9.38482	1.14199	0.817844	1.16423	1.12017
12757346	NM_001083434	AKT1S1	chr18	0.941784	0.0175167	0.0649217	6.84732	6.86119	6.60666	7.10185	6.78501	6.90964	6.42832	7.29406	1.00966	0.709472	0.780958	1.30534
12883341	NM_174711	CSNK1A1	chr7	0.0247903	0.0175293	0.368911	9.53852	9.74894	9.53124	9.75622	9.38676	9.69028	9.67573	9.82216	1.15703	0.855612	1.22177	1.09572
12839635	NM_001101139	USP33	chr3	0.408365	0.0175535	0.369483	7.69236	7.80373	7.5744	7.92169	7.45815	7.92657	7.69065	7.91681	1.08026	0.78606	1.17487	0.993259
12904934	NM_001076016	CCDC22	chrX	0.438827	0.017646	0.907801	6.60998	6.75097	6.91532	6.44562	6.85527	6.36468	6.97537	6.52657	1.10266	1.38482	1.08681	1.11875
12903047	NM_001075133	PGRMC1	chrX	0.376831	0.0176673	0.799402	6.84574	7.10517	7.35282	6.59809	7.18623	6.50525	7.51941	6.69094	1.19701	1.68731	1.25978	1.13736
12879012	NM_001040525	SLC26A2	chr7	0.181976	0.0176821	0.177542	5.50003	5.82625	5.35406	5.97221	5.35583	5.64423	5.3523	6.3002	1.25372	0.651506	0.997551	1.57568
12845601	ENSBTAT00000065314	MANEAL	chr3	0.591625	0.0180936	0.0377503	5.49732	5.62398	5.86522	5.25609	6.06391	4.93074	5.66653	5.58144	1.09176	1.52534	0.759236	1.56993
12807029	NM_001191144	KCNK5	chr23	0.952279	0.0181104	0.542059	5.28268	5.29333	5.51865	5.05736	5.56791	4.99744	5.46938	5.11727	1.00741	1.37677	0.933989	1.08661
12790674	NM_001099074	FBXO22	chr21	0.610985	0.0181246	0.204094	6.29656	6.38383	6.11882	6.56157	5.96382	6.62929	6.27383	6.49384	1.06236	0.735734	1.23971	0.910384
12726388	NM_001145035	C15H11orf96	chr15	0.686474	0.0182332	0.360701	5.73506	5.67846	5.88777	5.52576	5.98086	5.48927	5.79468	5.56224	0.961525	1.28522	0.878931	1.05188
12706802	NM_001206209	CCDC88A	chr11	0.672884	0.0184223	0.967924	7.30381	7.21021	6.97146	7.54255	7.02271	7.58491	6.92022	7.5002	0.93718	0.673108	0.931422	0.942972
12736974	NM_001102222	DARS2	chr16	0.893276	0.0185232	0.914259	5.59432	5.62131	5.34823	5.8674	5.3239	5.86473	5.37256	5.87007	1.01889	0.697772	1.03431	1.0037
12751793	ENSBTAT00000007652	CCDC61	chr18	0.333077	0.018698	0.159074	5.59616	5.5129	5.66367	5.44539	5.76692	5.42541	5.56043	5.46536	0.943918	1.16335	0.866644	1.02808
12736448	NM_001099947	ZC3H11A	chr16	0.0584355	0.0187211	0.712695	8.26091	8.4792	8.22995	8.51016	8.10073	8.42109	8.35917	8.59924	1.16336	0.82347	1.19619	1.13143
12750457	NM_001015543	RPL13	chr18	0.112917	0.0189041	0.0677012	11.1666	11.0647	11.0363	11.195	11.0277	11.3055	11.0449	11.0845	0.931788	0.895842	1.01196	0.857965
12869162	ENSBTAT00000014034	LOC783807	chr5	0.184173	0.0189494	0.70801	6.77922	6.63036	6.56483	6.84475	6.61881	6.93963	6.51084	6.74988	0.901964	0.823634	0.927896	0.876758
12890512	NM_001100381	SLC31A1	chr8	0.672733	0.0189719	0.992838	11.3576	11.3349	11.2775	11.4149	11.2891	11.426	11.266	11.4038	0.984421	0.909171	0.984094	0.984749
12820806	XM_003584083	HELLS	chr26	0.3588	0.0189973	0.724919	9.26507	9.34813	9.19193	9.42126	9.13467	9.39548	9.2492	9.44705	1.05926	0.853032	1.08263	1.03639
12905059	NM_001046389	PQBP1	chrX	0.865475	0.018998	0.203416	8.62695	8.58701	8.90965	8.30431	9.08347	8.17043	8.73582	8.43819	0.972692	1.52133	0.78586	1.20394
12833176	NM_001037588	UBXN1	chr29	0.0588268	0.0190636	0.335355	8.19683	8.38653	8.17014	8.41322	8.1216	8.27207	8.21868	8.55438	1.14052	0.844936	1.06961	1.21614
12902527	ENSBTAT00000063923	CCNB3	chrX	0.928565	0.0190651	0.680806	6.68492	6.70016	6.91071	6.47438	6.86802	6.50182	6.95339	6.44694	1.01062	1.35316	1.06095	0.962675
12802165	NM_001046216	RNF8	chr23	0.683572	0.0190735	0.418687	8.90657	8.87178	8.77993	8.99842	8.76254	9.0506	8.79732	8.94623	0.976173	0.859468	1.0244	0.930215
12721978	NM_001075188	TONSL	chr14	0.711909	0.019135	0.694499	5.85886	5.90685	5.71657	6.04914	5.7181	5.99962	5.71503	6.09866	1.03382	0.794117	0.997879	1.07106
12887933	NM_001040600	FBXL12	chr7	0.432323	0.0191436	0.639549	5.99818	5.80391	5.58692	6.21517	5.74162	6.25474	5.43222	6.1756	0.874018	0.646962	0.806981	0.946623
12906467	XM_003585409	LOC100850685	chrX	0.320213	0.0192224	0.277692	6.78483	6.29216	7.16354	5.91344	7.14004	6.42962	7.18705	5.39726	0.710706	2.37858	1.03312	0.488909
12905745	NM_001206237	FAM199X	chrX	0.0213024	0.019229	0.105023	5.6596	6.07413	6.07824	5.6555	6.01051	5.3087	6.14596	6.0023	1.33287	1.34047	1.09844	1.61732
12802096	NM_001101093	KCTD20	chr23	0.486787	0.0192764	0.68215	7.0365	7.17422	6.85371	7.35701	6.7445	7.3285	6.96291	7.38553	1.10016	0.705487	1.16345	1.04032
12881821	NM_001205534	CAMSAP3	chr7	0.926525	0.0194785	0.370128	6.92936	6.92069	7.04516	6.8049	7.09216	6.76656	6.99816	6.84323	0.994009	1.18121	0.93692	1.05458
12754353	NM_001077094	CYTH2	chr18	0.822368	0.0196979	0.772052	5.92787	5.88557	5.66658	6.14686	5.66043	6.19532	5.67274	6.0984	0.971103	0.716841	1.00857	0.935027
12881157	NM_001206374	TRMT1	chr7	0.635878	0.0198136	0.909309	6.68341	6.75282	6.90421	6.53203	6.86118	6.50564	6.94723	6.55841	1.04929	1.29431	1.06146	1.03725
12841721	XM_001252714	KIAA0319L	chr3	0.818963	0.0199191	0.374399	5.31585	5.2818	5.10966	5.488	5.19354	5.43816	5.02578	5.53783	0.976676	0.769322	0.890222	1.07153
12786213	XM_002696401	ZFR	chr20	0.857342	0.0201752	0.121713	9.26636	9.2543	9.1752	9.34547	9.12729	9.40544	9.22312	9.28549	0.991676	0.88868	1.06868	0.920221
12684946	NM_001080281	SNX4	chr1	0.410596	0.020305	0.978926	8.26989	8.37876	8.15837	8.49028	8.1022	8.43757	8.21453	8.54298	1.07838	0.794483	1.08097	1.0758
12686816	NM_001191337	TP63	chr1	0.353882	0.0203474	0.420081	5.24307	5.02745	4.84451	5.42602	5.04577	5.44038	4.64325	5.41165	0.861175	0.668265	0.756539	0.980283
12724226	NM_174141	PENK	chr14	0.761842	0.0204905	0.400625	5.69626	5.71555	5.62547	5.78634	5.58881	5.80371	5.66212	5.76897	1.01346	0.894483	1.05213	0.976212
12765919	NM_001191186	HOXB9	chr19	0.0236493	0.0205673	0.584847	4.98339	4.58796	4.98886	4.58249	5.14249	4.8243	4.83523	4.34069	0.760264	1.32534	0.808179	0.71519
12909914	NM_001192740	MBNL3	chrX	0.321454	0.0205688	0.505055	9.25692	9.08514	9.38673	8.95533	9.52986	8.98398	9.24361	8.92668	0.887752	1.34854	0.820031	0.961066
12904359	NM_001103257	SNX12	chrX	0.145786	0.0206539	0.898451	7.08422	7.51323	7.65893	6.93852	7.46261	6.70583	7.85524	7.17121	1.3463	1.64764	1.31278	1.38069
12771020	NM_001192556	RASL10B	chr19	0.00670964	0.0206558	0.0733783	5.2572	4.81894	4.85727	5.21886	4.94147	5.57293	4.77307	4.8648	0.738024	0.778304	0.889831	0.612115
12844014	NM_001075432	ALG6	chr3	0.221239	0.020723	0.920325	7.60649	7.78731	7.87915	7.51465	7.79596	7.41703	7.96234	7.61228	1.13352	1.28743	1.12224	1.14492
12704518	NM_001101878	PQLC3	chr11	0.0307763	0.0207446	0.271147	4.97204	5.62852	5.65579	4.94477	5.1696	4.77448	6.14198	5.11507	1.57623	1.63696	1.96207	1.26627
12821398	NM_177502	GOT1	chr26	0.827038	0.0207902	0.240728	7.98149	7.95017	7.78504	8.14662	7.8866	8.07638	7.68348	8.21686	0.978526	0.77831	0.868671	1.10227
12720275	ENSBTAT00000028803	TASP1	chr13	0.827261	0.0207911	0.496227	5.02802	5.00427	4.8789	5.1534	4.8535	5.20254	4.90429	5.10426	0.983676	0.826736	1.03583	0.934145
12904044	NM_001038109	TSPAN6	chrX	0.731321	0.0208199	0.810914	9.01392	9.05971	9.20478	8.86885	9.16595	8.86189	9.24361	8.87581	1.03225	1.26219	1.0553	1.00969
12786613	NM_001076417	ERGIC1	chr20	0.336603	0.0208476	0.552521	7.71857	7.50804	7.88565	7.34096	8.05539	7.38175	7.71591	7.30017	0.864218	1.45871	0.790324	0.94502
12781477	NM_001075607	NUDC	chr2	0.633379	0.0208736	0.76793	10.2234	10.2617	10.1418	10.3433	10.1109	10.336	10.1727	10.3506	1.02686	0.869639	1.0438	1.0102
12828466	NM_001017946	DNAJB12	chr28	0.590988	0.020875	0.0406575	7.44542	7.35538	7.19005	7.61075	7.05225	7.83858	7.32785	7.38291	0.939498	0.747064	1.2105	0.72917
12776937	NM_001046256	MTMR9	chr2	0.797171	0.0209293	0.426962	5.49785	5.52761	5.36689	5.65857	5.39842	5.59727	5.33535	5.71987	1.02084	0.816947	0.957222	1.0887
12906113	NM_001191544	BCOR	chrX	0.992484	0.0211206	0.484958	7.47691	7.47813	7.63984	7.31519	7.59384	7.35998	7.68584	7.27041	1.00084	1.25236	1.06585	0.939803
12742101	ENSBTAT00000003355	GLTP	chr17	0.65415	0.0212471	0.0668118	6.60735	6.50085	6.85196	6.25624	7.13461	6.08009	6.56931	6.43239	0.928839	1.51123	0.675815	1.27659
12681607	BC110223	C1H21orf59	chr1	0.293348	0.021252	0.00686339	7.6782	7.82168	7.91853	7.58135	8.05155	7.30486	7.78552	7.85784	1.10456	1.26329	0.831605	1.46711
12783878	NM_001076235	MED18	chr2	0.559571	0.0212774	0.181501	6.76166	6.98064	7.3402	6.4021	7.48738	6.03594	7.19302	6.76825	1.16391	1.91601	0.815436	1.66129
12718011	ENSBTAT00000021569	TGM2	chr13	0.776673	0.0213068	0.506925	7.57994	7.62953	7.82413	7.38534	7.74097	7.4189	7.90728	7.35179	1.03498	1.35546	1.12219	0.954546
12837363	NM_001046002	CD48	chr3	0.0504878	0.0214249	0.0950444	9.54092	9.77099	9.79463	9.51727	9.58308	9.49875	10.0062	9.5358	1.17289	1.21197	1.3408	1.02601
12808001	BC118484	RALBP1	chr24	0.69096	0.0215631	0.332873	7.18204	7.21957	7.31884	7.08277	7.25379	7.1103	7.38389	7.05525	1.02636	1.17778	1.09437	0.962566
12868043	NM_001099107	MDM2	chr5	0.746389	0.021766	0.959743	7.30818	7.37666	7.07794	7.6069	7.04904	7.56732	7.10685	7.64647	1.04861	0.693057	1.04088	1.05639
12904842	NM_001101146	SLC9A6	chrX	0.638138	0.0217738	0.112158	5.49786	5.65415	5.99029	5.16172	5.63811	5.35761	6.34246	4.96584	1.11442	1.77592	1.62941	0.762196
12905385	XM_002699510	CUL4B	chrX	0.776342	0.0218826	0.117681	8.20476	8.24032	8.37878	8.0663	8.25924	8.15028	8.49831	7.98233	1.02495	1.24184	1.18023	0.890105
12758768	ENSBTAT00000064364	LOC538483	chr18	0.212692	0.0219078	0.192963	5.57233	5.47515	5.42871	5.61876	5.52818	5.61647	5.32925	5.62105	0.93486	0.876576	0.871196	1.00318
12721107	NM_001077019	OGFR	chr13	0.886432	0.0219215	0.237379	5.78806	5.80745	5.62819	5.96733	5.7005	5.87562	5.55588	6.05903	1.01353	0.790516	0.904614	1.13556
12721773	NM_174814	YWHAZ	chr14	0.0798191	0.0220045	0.893849	9.63753	9.76596	9.61467	9.78882	9.55511	9.71995	9.67423	9.85769	1.0931	0.886293	1.08607	1.10018
12903372	ENSBTAT00000066094	PRKX	chrX	0.667293	0.0220246	0.105875	6.26713	6.35107	6.55212	6.06608	6.34591	6.18835	6.75833	5.94381	1.05991	1.4006	1.33091	0.844084
12902832	NM_174064	GDI1	chrX	0.838875	0.022172	0.775974	8.55197	8.51864	8.73947	8.33113	8.7328	8.37113	8.74615	8.29114	0.977167	1.32716	1.00929	0.946065
12905830	NM_001035482	NSDHL	chrX	0.467511	0.0222136	0.803044	8.0628	8.20949	8.38562	7.88667	8.33727	7.78834	8.43398	7.985	1.10702	1.41319	1.06933	1.14605
12717920	ENSBTAT00000006947	ADA	chr13	0.411012	0.022237	0.206342	6.23139	6.056	5.88078	6.40661	5.83165	6.63112	5.92991	6.1821	0.885534	0.694557	1.07048	0.73254
12800859	NM_001105479	RRP36	chr23	0.0509542	0.0222486	0.989395	6.04776	6.48193	6.00446	6.52523	5.78599	6.30953	6.22294	6.74093	1.35114	0.697003	1.35374	1.34854
12691778	XM_002690533	C10H15orf60	chr10	0.380538	0.0223235	0.996133	5.40609	5.5824	5.74148	5.24701	5.65381	5.15837	5.82915	5.33564	1.12999	1.40881	1.12924	1.13074
12887101	NM_001105417	CLINT1	chr7	0.475293	0.0224762	0.250811	10.3343	10.3919	10.4626	10.2635	10.4808	10.1877	10.4445	10.3393	1.04076	1.14799	0.975154	1.11077
12820483	NM_001206896	CUTC	chr26	0.573945	0.0226283	0.471277	6.07894	5.94606	5.72055	6.30446	5.70158	6.4563	5.73951	6.15262	0.912012	0.667152	1.02664	0.810181
12899051	XM_002690169	FAXC	chr9	0.860047	0.0226681	0.492427	5.78987	5.83043	5.52475	6.09555	5.42495	6.15479	5.62455	6.03631	1.02851	0.673244	1.14838	0.92116
12825006	NM_001192992	FAT1	chr27	0.407266	0.0228737	0.109861	6.74782	6.90976	6.58932	7.06826	6.34728	7.14835	6.83135	6.98818	1.1188	0.7175	1.39868	0.894922
12817967	NM_001038172	PGP	chr25	0.850561	0.0230445	0.936815	7.30216	7.26174	7.54726	7.01664	7.55897	7.04535	7.53555	6.98793	0.972369	1.44455	0.983896	0.960978
12846750	XM_618406	PTGFRN	chr3	0.596986	0.0232306	0.304222	6.43913	6.34981	6.18673	6.6022	6.31927	6.55899	6.0542	6.64541	0.939967	0.749777	0.832161	1.06174
12687880	NM_173891	BRB	chr10	0.238374	0.0232595	0.725194	9.87387	10.0878	10.2	9.76172	10.1242	9.62348	10.2757	9.89995	1.15987	1.35497	1.1107	1.21122
12805618	NM_001040527	MRPL2	chr23	0.442789	0.0232887	0.817788	8.56543	8.65848	8.46368	8.76022	8.431	8.69986	8.49636	8.82059	1.06662	0.814201	1.04634	1.08729
12821736	NM_001205581	ATAD1	chr26	0.33051	0.0233009	0.327115	9.04867	9.14481	9.21687	8.97662	9.21722	8.88013	9.21652	9.07311	1.06891	1.1812	0.999516	1.14312
12773820	NM_001105654	TMEM234	chr2	0.19409	0.0233118	0.375587	6.03902	6.43982	5.86868	6.61016	5.80303	6.27501	5.93432	6.94531	1.32024	0.598125	1.09528	1.5914
12899873	NM_001038052	PHF10	chr9	0.106933	0.0233618	0.465068	6.75762	7.01199	6.69817	7.07144	6.51526	6.99998	6.88108	7.1429	1.19281	0.772031	1.28861	1.10414
12903280	NM_001205555	XPNPEP2	chrX	0.255794	0.0234456	0.843577	9.37082	9.45771	9.50659	9.32194	9.47054	9.2711	9.54264	9.37277	1.06207	1.13654	1.05125	1.07301
12884097	NM_001075314	RNF126	chr7	0.826447	0.0236526	0.96265	8.91712	8.9009	8.99999	8.81802	9.00637	8.82787	8.99361	8.80818	0.98882	1.13443	0.991196	0.986451
12836516	NM_001034223	FHL3	chr3	0.348709	0.0237746	0.857216	5.55963	5.40626	5.68135	5.28454	5.77256	5.3467	5.59015	5.22238	0.899152	1.3166	0.88123	0.917439
12694064	BC134750	SPG11	chr10	0.327577	0.0237826	0.489741	6.44811	6.56794	6.35985	6.65621	6.25799	6.63824	6.4617	6.67418	1.0866	0.814303	1.15166	1.02522
12772834	NM_001076407	RNFT1	chr19	0.560374	0.0238329	0.926962	8.0183	8.14138	8.33821	7.82147	8.26703	7.76957	8.40938	7.87338	1.08906	1.43071	1.1037	1.0746
12706870	ENSBTAT00000024864	SLC4A1AP	chr11	0.311519	0.0238687	0.722005	6.93901	6.8147	6.72841	7.0253	6.76903	7.10899	6.68779	6.94161	0.917442	0.814006	0.945246	0.890455
12907703	NM_001038515	CETN2	chrX	0.900759	0.0239298	0.899846	8.51036	8.53969	8.81378	8.23628	8.78431	8.23641	8.84324	8.23614	1.02054	1.49226	1.04169	0.999812
12788277	BC151769	MARVELD2	chr20	0.975844	0.0239362	0.401718	7.1207	7.12565	6.92247	7.32388	6.85068	7.39071	6.99425	7.25704	1.00344	0.757117	1.10464	0.911508
12855480	BC148929	DMTF1	chr4	0.41638	0.0239851	0.894909	5.5455	5.38133	5.2181	5.70873	5.31339	5.7776	5.12282	5.63985	0.892447	0.711717	0.87626	0.908932
12909948	NM_001076245	UPRT	chrX	0.139957	0.0240041	0.354094	8.01299	7.81985	8.07144	7.7614	8.10867	7.91731	8.03422	7.60548	0.874697	1.23975	0.949699	0.805619
12772695	NM_001102282	CORO6	chr19	0.0171436	0.0241109	0.0344431	5.11301	5.38494	5.37633	5.12161	5.35856	4.86745	5.3941	5.37578	1.20742	1.1931	1.02494	1.4224
12784597	NM_001109807	PPIG	chr2	0.720258	0.0241452	0.0615174	9.88128	9.91456	9.78426	10.0116	9.67584	10.0867	9.89267	9.93644	1.02333	0.854215	1.16218	0.901073
12867080	NM_001105406	WASH1	chr5	0.125117	0.0242338	0.316498	5.52419	5.68724	5.48037	5.73106	5.45093	5.59745	5.5098	5.86467	1.11965	0.840493	1.04165	1.20349
12826622	NM_001077994	FAM149B1	chr28	0.0928803	0.0243295	0.905935	5.95435	6.30375	5.88598	6.37211	5.72302	6.18567	6.04895	6.55855	1.27403	0.713939	1.25347	1.29493
12812060	NM_001080903	RFC2	chr25	0.581851	0.0244557	0.339658	6.35814	6.47973	6.15029	6.68759	6.19595	6.52034	6.10463	6.85484	1.08793	0.689058	0.938666	1.26093
12906510	XM_003588199	LOC520372	chrX	0.359823	0.0244629	0.530005	6.77441	6.85036	6.91243	6.71234	6.8486	6.70022	6.97626	6.72446	1.05405	1.14877	1.09252	1.01694
12907524	NM_001098886	HCCS	chrX	0.585253	0.0247566	0.0926736	10.2483	10.1803	10.3655	10.063	10.2904	10.2062	10.4407	9.91986	0.95396	1.23328	1.10982	0.819985
12905607	NM_001081616	VMA21	chrX	0.331867	0.0248273	0.988364	7.14757	7.28844	7.39231	7.0437	7.32083	6.9743	7.46379	7.11309	1.10257	1.27334	1.10417	1.10098
12765985	XM_002695699	LOC786095	chr19	0.917365	0.0249443	0.716202	5.40302	5.41987	5.2137	5.60918	5.1757	5.63034	5.2517	5.58803	1.01175	0.760236	1.05409	0.971103
12854964	NM_001034591	ZC3HC1	chr4	0.797088	0.0249853	0.249461	6.88895	6.93486	6.69474	7.12907	6.77672	7.00117	6.61275	7.25697	1.03234	0.740036	0.892567	1.19399
12816513	NM_001034428	ASL	chr25	0.315739	0.0252014	0.671713	7.60547	7.70948	7.53351	7.78144	7.50318	7.70776	7.56383	7.85512	1.07476	0.842102	1.04294	1.10754
12904656	NM_001034560	ACOT9	chrX	0.913016	0.0252269	0.730019	8.1743	8.15887	8.33826	7.99491	8.32155	8.02705	8.35497	7.96277	0.989357	1.2687	1.02343	0.956417
12696472	NM_001195019	ANP32A	chr10	0.813048	0.0252633	0.84126	7.72883	7.68195	7.46485	7.94593	7.46845	7.98921	7.46126	7.90265	0.968032	0.716441	0.99503	0.941766
12799543	ENSBTAT00000061439	SLMAP	chr22	0.972666	0.0253329	0.399835	8.22809	8.23295	8.0583	8.40273	7.99547	8.4607	8.12113	8.34476	1.00337	0.787619	1.09101	0.922782
12869004	NM_175798	CD38	chr5	0.95363	0.0254555	0.798347	6.64021	6.6293	6.86225	6.40726	6.84372	6.4367	6.88078	6.37782	0.992468	1.37077	1.02602	0.960009
12801255	NM_001033614	RPS18	chr23	0.473416	0.0255194	0.164543	11.58	11.6018	11.5544	11.6274	11.522	11.6381	11.5869	11.6167	1.0152	0.950676	1.04603	0.985271
12744115	NM_001101204	DGCR8	chr17	0.0109347	0.0255481	0.267645	6.23528	6.64896	6.26516	6.61908	5.97578	6.49479	6.55454	6.74337	1.33207	0.782455	1.49357	1.18803
12815923	NM_001035045	FSCN1	chr25	0.455544	0.025644	0.994767	6.78947	6.65894	6.93416	6.51424	6.99886	6.58008	6.86947	6.44841	0.913492	1.33786	0.914213	0.912773
12692025	BC122820	LOC616348	chr10	0.666818	0.02567	0.145705	5.58078	5.74044	6.10831	5.2129	6.30685	4.8547	5.90978	5.57111	1.11703	1.86014	0.759397	1.64308
12744348	NM_001191138	ELF2	chr17	0.0321041	0.0258246	0.355516	8.64275	8.74683	8.64033	8.74926	8.56719	8.71831	8.71346	8.7802	1.07481	0.927276	1.1067	1.04383
12783701	BC149721	TYW5	chr2	0.290385	0.0261162	0.0969832	7.1715	7.52912	6.94948	7.75114	6.48236	7.86063	7.41661	7.64164	1.28132	0.573691	1.91089	0.859167
12832914	ENSBTAT00000026258	PC	chr29	0.0081024	0.0261196	0.480449	7.12683	7.33949	7.14692	7.3194	7.06601	7.18766	7.22783	7.45115	1.15882	0.887312	1.11869	1.20038
12843655	NM_001083383	NUDT17	chr3	0.509868	0.0261586	0.12	4.97362	5.04302	4.88218	5.13446	4.76293	5.18431	5.00144	5.08461	1.04928	0.839571	1.17977	0.933227
12765561	NM_001035489	MRPL38	chr19	0.760979	0.0262625	0.132057	8.62588	8.66899	8.81796	8.47691	8.90695	8.34482	8.72897	8.609	1.03033	1.26668	0.883942	1.20096
12910342	NM_001101277	FOXO4	chrX	0.32634	0.0263889	0.558959	6.16358	5.90732	6.34495	5.72595	6.39755	5.92961	6.29235	5.5223	0.837259	1.53581	0.929673	0.754032
12812382	NM_001077422	HBA	chr25	0.319022	0.0263998	0.307201	9.24507	9.12153	9.33019	9.03642	9.4553	9.03484	9.20507	9.038	0.917934	1.22584	0.840761	1.00219
12714464	NM_001035272	SRSF6	chr13	0.0693091	0.0265221	0.526883	9.13819	8.98094	8.9609	9.15823	9.06564	9.21073	8.85616	9.10573	0.896737	0.872162	0.864845	0.929805
12840345	NM_001192906	DOCK7	chr3	0.916539	0.0265469	0.977002	6.14919	6.12891	6.37165	5.90645	6.38457	5.9138	6.35872	5.89911	0.986046	1.3805	0.982242	0.989864
12702649	---	---	chr11	0.610045	0.0266899	0.173275	5.12189	5.22285	5.40916	4.93558	5.22037	5.02341	5.59794	4.84775	1.07248	1.38854	1.29915	0.885362
12910278	NM_001076411	UPF3B	chrX	0.668231	0.0268077	0.698769	6.99066	6.88778	7.22647	6.65196	7.32434	6.65698	7.12861	6.64695	0.931169	1.48917	0.873128	0.993068
12779317	NM_001034790	STMN1	chr2	0.429624	0.0268202	0.439759	8.30161	8.18431	8.4194	8.06652	8.5354	8.06782	8.3034	8.06521	0.921908	1.27711	0.851453	0.998193
12776426	ENSBTAT00000038024	SERINC2	chr2	0.978942	0.0268635	0.0542718	9.32865	9.33281	9.51982	9.14163	9.67889	8.9784	9.36074	9.30487	1.00289	1.2997	0.802096	1.25395
12831313	NM_001103271	SF3B2	chr29	0.688128	0.0269186	0.237701	9.09002	9.0574	8.9765	9.17093	8.94386	9.23619	9.00914	9.10566	0.977639	0.873919	1.04629	0.913494
12741692	ENSBTAT00000053293 // ENSBTAT00000053293 // ENSBTAT00000053293 // ENSBTAT00000053293 // ENSBTAT00000053293	LOC100335194 // LOC100301462 // COX7B // LOC100297586 // LOC100295347	chr17	0.524335	0.0269746	0.603025	11.0032	11.0552	11.1266	10.9318	11.0793	10.927	11.1738	10.9366	1.03674	1.14452	1.06769	1.0067
12793341	NM_001101164	EGLN3	chr21	0.351441	0.0269922	0.880485	6.76334	6.42173	7.02579	6.15927	7.22379	6.30289	6.8278	6.01565	0.789159	1.82326	0.759969	0.819471
12904916	NM_001035403	RP2	chrX	0.954588	0.0270182	0.472558	5.08382	5.07065	5.35438	4.8001	5.2772	4.89045	5.43156	4.70975	0.990911	1.46844	1.11293	0.882273
12889977	XM_586808	DCAF10	chr8	0.626967	0.0270902	0.517987	6.11842	6.25492	6.52174	5.8516	6.36244	5.87439	6.68103	5.8288	1.09923	1.59123	1.24711	0.968889
12837546	BC109610	C3H1orf52	chr3	0.560766	0.0271414	0.559178	7.36838	7.26118	7.53418	7.09537	7.64161	7.09515	7.42676	7.09559	0.928388	1.35549	0.861642	1.0003
12804528	---	---	chr23	0.671974	0.0274669	0.214063	5.73148	5.69208	5.82257	5.60098	5.90137	5.56159	5.74377	5.64038	0.973059	1.16602	0.896519	1.05613
12813350	NM_001205967	ATF7IP2	chr25	0.440876	0.0276405	0.16916	6.335	6.46372	6.59664	6.20207	6.41502	6.25497	6.77826	6.14918	1.09332	1.31455	1.28631	0.929293
12906046	XM_001251062	LAGE3	chrX	0.548855	0.0277225	0.503447	8.3691	8.27192	8.5126	8.12842	8.61549	8.1227	8.4097	8.13414	0.934861	1.30512	0.867064	1.00796
12814335	NM_001193188	GFER	chr25	0.23262	0.0278477	0.0566121	7.49279	7.65853	7.41409	7.73723	7.46846	7.51712	7.35971	7.95734	1.12174	0.799326	0.927389	1.35682
12900853	BC133427	C9H6orf162	chr9	0.533366	0.0282229	0.821183	6.47414	6.58422	6.32062	6.73774	6.24571	6.70256	6.39553	6.77292	1.07929	0.748919	1.10943	1.04997
12678593	NM_001040473	GART	chr1	0.192201	0.0282614	0.802849	7.62574	7.81175	7.55402	7.88347	7.44367	7.80781	7.66436	7.95914	1.13761	0.795837	1.16529	1.11059
12837617	BC149429	DCAF8	chr3	0.699568	0.028279	0.519981	8.34883	8.27998	8.10314	8.52567	8.19521	8.50246	8.01108	8.54889	0.953397	0.746115	0.880179	1.0327
12905449	NM_001205799	KLHL15	chrX	0.467551	0.0284503	0.230032	6.99534	6.77428	7.2425	6.52713	7.16769	6.823	7.31731	6.23126	0.857933	1.6419	1.10928	0.663538
12740074	---	---	chr16	0.0680935	0.0284881	0.508605	5.27258	5.06992	5.04656	5.29594	5.11287	5.43228	4.98025	5.15959	0.86895	0.841261	0.912174	0.827774
12739643	ENSBTAT00000024915	DDI2	chr16	0.674787	0.0286539	0.131318	8.09457	8.16183	7.93899	8.31741	7.78022	8.40892	8.09776	8.22591	1.04773	0.769277	1.2462	0.880859
12853555	ENSBTAT00000033491	SLC37A3	chr4	0.258386	0.0287349	0.81467	6.27115	6.51462	6.14324	6.64253	6.04626	6.49603	6.24022	6.78902	1.18384	0.707457	1.1439	1.22517
12890580	XM_598421	CNTRL	chr8	0.106261	0.028817	0.809741	5.00857	4.77742	4.73083	5.05516	4.82987	5.18726	4.63178	4.92306	0.851959	0.79867	0.871703	0.832661
12832183	NM_001103252	ZNF740	chr29	0.457676	0.0288427	0.965783	8.11117	7.91425	7.70205	8.32337	7.80615	8.4162	7.59795	8.23055	0.872408	0.650074	0.865617	0.879253
12841527	NM_001101275	ITLN2	chr3	0.0341626	0.0291385	0.448374	6.72633	6.41499	6.73173	6.40959	6.93964	6.51301	6.52382	6.30616	0.805895	1.25018	0.749593	0.866427
12693638	NM_001166523	MTFMT	chr10	0.706723	0.0293077	0.0983992	6.40466	6.3016	6.03116	6.67509	6.31878	6.49054	5.74355	6.85964	0.931055	0.639969	0.671179	1.29155
12722586	NM_001076865	TERF1	chr14	0.0354533	0.029333	0.969479	8.15169	8.44375	8.1456	8.44984	7.9971	8.30629	8.2941	8.5934	1.22438	0.809867	1.22858	1.2202
12781450	NM_001080269	PQLC2	chr2	0.679102	0.0293808	0.971319	7.24541	7.18603	7.38427	7.04717	7.41654	7.07428	7.35201	7.02005	0.959676	1.26322	0.956258	0.963105
12797019	ENSBTAT00000030766	RYBP	chr22	0.0483357	0.0293958	0.819369	8.48197	8.64425	8.6539	8.47232	8.58157	8.38237	8.72622	8.56227	1.11905	1.13412	1.10547	1.13281
12897943	NM_001192790	SENP6	chr9	0.87074	0.0294008	0.0229441	8.48321	8.47361	8.40893	8.54788	8.34066	8.62576	8.4772	8.47001	0.993363	0.908178	1.09927	0.897662
12904211	NM_001075731	GEMIN8	chrX	0.375698	0.0294132	0.507907	7.37948	7.59354	7.76741	7.20561	7.73993	7.01902	7.79489	7.39219	1.15995	1.47612	1.03883	1.2952
12762367	ENSBTAT00000010716	MAP3K3	chr19	0.289996	0.0294785	0.576628	6.55556	6.69967	6.47023	6.78501	6.4357	6.67542	6.50476	6.89459	1.10505	0.803972	1.04903	1.16406
12880985	NM_001033763	DNAJB1	chr7	0.102154	0.0295173	0.0681389	7.10589	7.35136	7.39778	7.05947	7.13658	7.0752	7.65899	7.04374	1.18548	1.26428	1.43634	0.97843
12680307	NM_001034463	C1H21orf33	chr1	0.519105	0.0295796	0.536415	5.76365	5.65422	5.51067	5.9072	5.61784	5.90947	5.40351	5.90492	0.926948	0.759687	0.861948	0.99685
12754444	NM_001243331	CPNE2	chr18	0.375858	0.0295806	0.172454	5.52916	5.37371	5.65524	5.24762	5.85483	5.20348	5.45565	5.29176	0.897853	1.3265	0.75829	1.0631
12905512	NM_001110084	DMD	chrX	0.87448	0.0296209	0.507176	5.05626	5.01407	5.34894	4.7214	5.28088	4.83164	5.41699	4.61115	0.971184	1.54493	1.09894	0.85828
12902260	XM_003584350	PIGA	chrX	0.158195	0.0296216	0.900078	5.91659	6.25184	6.3546	5.81383	6.17254	5.66065	6.53667	5.96701	1.26159	1.45475	1.28711	1.23658
12843266	NM_001192050	EFCAB7	chr3	0.27402	0.0298708	0.818693	5.70634	6.02473	6.20055	5.53052	6.0741	5.33857	6.32699	5.72246	1.24694	1.59111	1.19159	1.30486
12884862	BC111346	FAM114A2	chr7	0.598647	0.0299073	0.686587	7.34363	7.43603	7.18482	7.59485	7.10327	7.584	7.26636	7.60569	1.06614	0.752608	1.11969	1.01515
12872617	NM_001077001	RBPJ	chr6	0.898726	0.0301297	0.948115	9.53606	9.54373	9.61049	9.4693	9.60861	9.4635	9.61236	9.4751	1.00533	1.10281	1.0026	1.00807
12902845	NM_001034035	HPRT1	chrX	0.55324	0.0302057	0.387325	10.6841	10.6402	10.7483	10.576	10.738	10.6301	10.7585	10.5218	0.970039	1.12687	1.01432	0.927693
12720185	NM_001192680	SPATA2	chr13	0.358114	0.0302874	0.438807	5.69186	5.56114	5.79067	5.46233	5.91087	5.47284	5.67047	5.45181	0.913377	1.25557	0.846505	0.985532
12821410	NM_001040475	RBP4	chr26	0.508528	0.0304013	0.138326	5.37649	5.1916	4.9594	5.60869	5.2651	5.48788	4.65371	5.72949	0.879715	0.637596	0.654566	1.18231
12906193	XM_002699810	LOC786285	chrX	0.578101	0.0306526	0.857486	6.23384	6.36125	6.56357	6.03153	6.47938	5.9883	6.64775	6.07476	1.09233	1.44597	1.12378	1.06176
12723435	NM_001076318	TMEM65	chr14	0.834738	0.0307936	0.361221	6.33049	6.3884	6.03606	6.68284	5.87876	6.78223	6.19336	6.58345	1.04096	0.638705	1.24367	0.871289
12880575	NM_001037611	G3BP1	chr7	0.470539	0.0309418	0.465807	9.94045	9.98216	9.89454	10.0281	9.89477	9.98613	9.89432	10.07	1.02933	0.911602	0.999686	1.05986
12834965	NM_001206245	HNRNPUL2	chr29	0.555209	0.0309419	0.573236	9.29225	9.3671	9.18275	9.47661	9.10961	9.4749	9.25588	9.47832	1.05325	0.815717	1.10671	1.00237
12688364	NM_001075151	SLC7A7	chr10	0.127933	0.0310088	0.665232	5.47038	5.13887	5.54878	5.06047	5.66902	5.27174	5.42854	4.84921	0.794703	1.4028	0.846459	0.746112
12766728	XM_002695599	LOC100297075	chr19	0.835217	0.0310115	0.942872	6.49266	6.52429	6.6854	6.33155	6.66414	6.32118	6.70667	6.34192	1.02217	1.27797	1.02992	1.01448
12721048	NM_001099170	TMX4	chr13	0.0541968	0.0314135	0.565891	6.73742	7.12725	7.15358	6.71109	6.90367	6.57117	7.40349	6.85101	1.31024	1.35895	1.41405	1.21406
12903123	NM_203363	PLP2	chrX	0.444138	0.0314926	0.350689	8.97706	9.12165	9.26654	8.83217	9.28282	8.6713	9.25026	8.99305	1.10542	1.35132	0.977681	1.24985
12769391	NM_001075457	CHMP6	chr19	0.00703227	0.0316617	0.160842	5.7235	5.16369	5.2303	5.65689	5.64341	5.80358	4.81718	5.5102	0.678395	0.744017	0.564001	0.815991
12787792	NM_001101128	UTP15	chr20	0.838433	0.0317699	0.223658	7.02402	7.05731	6.85171	7.22962	6.93674	7.1113	6.76668	7.34793	1.02334	0.769555	0.888807	1.17824
12709777	NM_001192942	RAP2A	chr12	0.405668	0.0318834	0.932977	6.58921	6.79802	6.98098	6.40624	6.86613	6.31228	7.09583	6.5002	1.15573	1.48941	1.17259	1.13912
12734902	NM_001034206	SOAT1	chr16	0.821756	0.0319969	0.515067	10.906	10.9169	10.8555	10.9674	10.8342	10.9778	10.8768	10.957	1.00759	0.925353	1.02999	0.985681
12751848	NM_001083688	NOL3	chr18	0.708826	0.0320264	0.904068	5.65829	5.73322	5.4643	5.92721	5.43891	5.87768	5.4897	5.97674	1.05331	0.725523	1.03584	1.07108
12895045	BC147885	LOC539818	chr8	0.0657383	0.0321213	0.633332	5.97056	6.17282	5.95153	6.19185	5.8753	6.06583	6.02777	6.31788	1.1505	0.846558	1.11147	1.1909
12874334	NM_001082437	COX18	chr6	0.88384	0.0324642	0.507641	6.04047	6.06546	6.25005	5.85589	6.29459	5.78635	6.20551	5.92542	1.01747	1.31418	0.940118	1.10119
12759360	ENSBTAT00000021704	COTL1	chr18	0.479435	0.0326223	0.808703	7.6548	7.81132	7.98587	7.48026	7.93421	7.3754	8.03753	7.58512	1.11459	1.41972	1.07424	1.15646
12712008	BC126640	PAN3	chr12	0.229528	0.0326471	0.989265	8.33482	8.45313	8.50473	8.28323	8.44492	8.22472	8.56453	8.34174	1.08546	1.16594	1.08644	1.08449
12905755	BC150024	CXHXorf38	chrX	0.738081	0.032662	0.0309001	5.34314	5.41505	5.6262	5.13198	5.84032	4.84596	5.41208	5.41801	1.05111	1.40856	0.743171	1.48664
12846956	NM_001099100	POGK	chr3	0.543141	0.0326827	0.209405	5.14904	5.00147	4.79756	5.35295	4.71603	5.58206	4.87909	5.12384	0.902766	0.680471	1.11966	0.727886
12820459	NM_001083723	NHLRC2	chr26	0.455953	0.0327216	0.217954	6.28912	6.42025	6.55529	6.15408	6.59978	5.97845	6.51081	6.3297	1.09515	1.32062	0.940193	1.27566
12680540	ENSBTAT00000032404	CRYBG3	chr1	0.204575	0.032798	0.882165	5.39603	5.11836	5.50247	5.01192	5.65711	5.13495	5.34782	4.8889	0.824923	1.40498	0.807039	0.843203
12839347	NM_001192651	WLS	chr3	0.635155	0.0330421	0.00512554	6.39959	6.2844	6.61977	6.06421	6.29153	6.50765	6.94801	5.62078	0.923258	1.46974	1.57623	0.540788
12908375	NM_001193106	GRIPAP1	chrX	0.222914	0.0331505	0.161536	6.5448	6.31002	6.64321	6.21161	6.62472	6.46488	6.66171	5.95833	0.849811	1.34874	1.02597	0.703901
12847295	NM_001046530	CCDC76	chr3	0.514527	0.0332032	0.492004	7.9195	7.83037	7.71915	8.03072	7.7167	8.1223	7.7216	7.93914	0.940092	0.805765	1.0034	0.880776
12907350	NM_001101046	PDHA1	chrX	0.398017	0.0332082	0.513031	8.88819	9.04005	9.16787	8.76037	9.15043	8.62594	9.1853	8.8948	1.111	1.32638	1.02446	1.20485
12694790	ENSBTAT00000023186 // ENSBTAT00000023186	LOC100296774 // CDO1	chr10	0.513157	0.0332248	0.668311	7.17583	7.02094	6.82857	7.36819	6.85547	7.49618	6.80167	7.2402	0.8982	0.687955	0.963395	0.837416
12865309	NM_001101926	ST13	chr5	0.710027	0.0332502	0.528815	10.2172	10.2434	10.1497	10.3109	10.1143	10.3201	10.1851	10.3017	1.01832	0.894272	1.05026	0.987354
12857869	NM_001038035	FAM118A	chr5	0.484164	0.0332878	0.298054	6.67602	6.50523	6.86832	6.31293	6.82547	6.52658	6.91116	6.09929	0.888352	1.46956	1.0612	0.743658
12887281	BC102792	BRD8	chr7	0.152206	0.0334304	0.998575	9.18346	9.06419	9.03153	9.21612	9.09124	9.27569	8.97182	9.15656	0.920653	0.879897	0.920561	0.920745
12696647	ENSBTAT00000028515	DCAF11	chr10	0.40659	0.0334809	0.470505	5.39661	5.2448	5.11356	5.52785	5.25529	5.53793	4.97182	5.51777	0.900118	0.750386	0.821614	0.986124
12762096	NM_001206261	RASD1	chr19	0.912928	0.0335335	0.561697	5.2058	5.19239	5.05865	5.33954	5.02957	5.38204	5.08774	5.29703	0.990742	0.823088	1.04114	0.942779
12772488	ENSBTAT00000026451	SMURF2	chr19	0.953222	0.0336019	0.91386	6.78776	6.77701	6.57261	6.99216	6.58791	6.98762	6.55732	6.9967	0.992572	0.747661	0.979018	1.00631
12683511	ENSBTAT00000055450	CD47	chr1	0.555762	0.0336367	0.585572	6.79228	6.91329	7.08641	6.61916	6.96996	6.61461	7.20286	6.62371	1.08749	1.38247	1.1752	1.00633
12813847	ENSBTAT00000056997	FBXL19	chr25	0.576549	0.0336415	0.83771	5.3492	5.29081	5.20099	5.43902	5.24085	5.45756	5.16113	5.42049	0.96033	0.847901	0.946239	0.974632
12883492	NM_001033619	RPL18A	chr7	0.376801	0.0336435	0.143541	11.8432	11.8189	11.8	11.8621	11.8327	11.8537	11.7673	11.8705	0.983298	0.957863	0.955671	1.01172
12847425	NM_001037469	H2B	chr3	0.637772	0.0336493	0.729721	6.45337	6.63993	6.09505	6.99825	5.93343	6.97331	6.25666	7.02319	1.13805	0.534698	1.25113	1.03518
12715099	NM_001046175	MAP1LC3A	chr13	0.230884	0.0336604	0.600334	5.49793	5.71571	5.80994	5.4037	5.65432	5.34154	5.96556	5.46585	1.16294	1.32523	1.24077	1.08999
12752266	ENSBTAT00000055496	RELB	chr18	0.967439	0.0337383	0.907039	5.28415	5.29236	5.51797	5.05854	5.5256	5.0427	5.51034	5.07438	1.0057	1.375	0.989473	1.0222
12702167	NM_001114156	SPTAN1	chr11	0.807163	0.0337508	0.420695	6.36503	6.34594	6.44479	6.26617	6.42255	6.3075	6.46704	6.22484	0.986855	1.1318	1.03132	0.94431
12859605	NM_001083435	BIN2	chr5	0.770444	0.0337977	0.824108	6.67297	6.74643	6.99699	6.4224	6.98823	6.35771	7.00576	6.4871	1.05224	1.48925	1.01223	1.09383
12908402	BC151770	TXLNG	chrX	0.984716	0.0338134	0.212682	7.35289	7.3504	7.50067	7.20262	7.41858	7.28721	7.58276	7.11803	0.99827	1.22948	1.12053	0.889349
12865365	NM_001101072	C5H12orf35	chr5	0.111185	0.0338517	0.120542	11.0595	11.1472	11.1637	11.0429	11.0772	11.0417	11.2503	11.0441	1.06272	1.08733	1.1275	1.00167
12774310	NM_173889	AK2	chr2	0.0242349	0.0340573	0.0153226	9.61609	9.42751	9.43399	9.60961	9.63112	9.60106	9.23686	9.61817	0.877472	0.885386	0.76088	1.01193
12731272	ENSBTAT00000017195	IFT46	chr15	0.648489	0.0341458	0.00107932	6.44344	6.5121	6.64891	6.30663	6.32059	6.56629	6.97724	6.04696	1.04874	1.26776	1.57642	0.697694
12799796	NM_001206543	CAND2	chr22	0.0499812	0.0341757	0.45852	5.3082	5.14868	5.31556	5.14132	5.42389	5.1925	5.20722	5.09014	0.895323	1.12837	0.860545	0.931505
12799315	---	---	chr22	0.74258	0.0341769	0.0479198	7.94426	7.89564	8.0884	7.7515	7.95689	7.93163	8.21992	7.57136	0.96686	1.26305	1.2	0.779019
12830323	BC149759	TNFRSF10A	chr29	0.17202	0.0343685	0.592492	5.27478	5.07717	5.01615	5.33581	5.07721	5.47235	4.95509	5.19926	0.871995	0.801262	0.918834	0.827544
12707162	NM_001206104	STRN	chr11	0.147478	0.0343803	0.148425	7.32932	7.19754	7.36353	7.16332	7.36369	7.29494	7.36337	7.03171	0.912705	1.14886	0.999772	0.833221
12703161	NM_001191410	GTF3C5	chr11	0.705196	0.0345672	0.414162	7.00154	6.96437	7.09439	6.87151	7.07253	6.93054	7.11626	6.81248	0.974569	1.16706	1.03078	0.921426
12876477	NM_001256554	SAFB2	chr7	0.670509	0.0346491	0.231899	8.129	8.16536	8.05034	8.24402	7.98004	8.27797	8.12065	8.21008	1.02552	0.874371	1.10237	0.954032
12756343	NM_001075224	PPP1R13L	chr18	0.709214	0.034665	0.256977	5.84182	5.88378	5.99037	5.73523	6.03435	5.64929	5.94639	5.82117	1.02951	1.19345	0.940848	1.12653
12866116	NM_001075713	MYL6B	chr5	0.55559	0.0347171	0.60258	6.48959	6.63728	6.28037	6.84651	6.14136	6.83782	6.41937	6.8552	1.1078	0.675421	1.21252	1.01212
12858932	NM_001037594	CDK4	chr5	0.725065	0.0347973	0.557017	8.21844	8.26536	8.09074	8.39307	8.10659	8.3303	8.07489	8.45584	1.03306	0.810942	0.978263	1.09092
12746728	ENSBTAT00000016102	LARP1B	chr17	0.0845302	0.0349204	0.505325	8.18322	8.00839	8.20536	7.98625	8.32517	8.04128	8.08554	7.93123	0.885866	1.16401	0.846966	0.926553
12731727	NM_001243290	USP47	chr15	0.464204	0.0349894	0.463473	7.92804	7.83201	7.73253	8.02752	7.82863	8.02744	7.63643	8.0276	0.935608	0.815078	0.875266	1.00011
12720350	NM_001192772	ESF1	chr13	0.398321	0.0351575	0.297575	8.55651	8.67445	8.45911	8.77185	8.32698	8.78605	8.59124	8.75766	1.08518	0.805108	1.20102	0.980515
12830237	NM_001034371	FOXRED1	chr29	0.42167	0.0351706	0.392716	5.2369	5.40176	5.08934	5.54933	4.91911	5.55469	5.25957	5.54396	1.12105	0.726994	1.26615	0.992584
12729666	NM_001101210	SLC35C1	chr15	0.731199	0.035178	0.77397	5.95259	6.01563	6.19159	5.77663	6.13373	5.77145	6.24945	5.78182	1.04467	1.33326	1.08352	1.00721
12721594	ENSBTAT00000021510	NPBWR1	chr14	0.75427	0.035189	0.475562	6.18266	6.07574	5.74294	6.51546	5.91906	6.44626	5.56682	6.58466	0.928569	0.585394	0.783368	1.10068
12811954	NM_001098897	PAQR4	chr25	0.910371	0.0353953	0.818453	5.45346	5.46644	5.32961	5.59029	5.33636	5.57057	5.32286	5.61001	1.00903	0.834695	0.990688	1.02772
12862136	NM_001206069	ZDHHC17	chr5	0.684687	0.0354328	0.233783	6.05821	6.17209	6.43145	5.79886	6.20414	5.91229	6.65877	5.68542	1.08213	1.55035	1.37043	0.85449
12832960	NM_001040494	EED	chr29	0.371639	0.0354931	0.744016	8.19405	8.32674	8.09465	8.42615	8.05229	8.33582	8.13701	8.51647	1.09634	0.794712	1.06049	1.13339
12908955	NM_001192637	OFD1	chrX	0.925495	0.0356127	0.0166437	5.58894	5.57028	5.80502	5.35421	5.55172	5.62617	6.05832	5.08224	0.987147	1.36681	1.4207	0.685901
12877278	ENSBTAT00000014552 // ENSBTAT00000014552 // ENSBTAT00000014552	LOC100335621 // LOC782238 // HINT1	chr7	0.883116	0.0357082	0.344833	10.4025	10.4164	10.3028	10.516	10.2507	10.5543	10.355	10.4777	1.00967	0.862627	1.07503	0.948289
12687517	NM_001109808	AP1G2	chr10	0.452555	0.0359005	0.22733	5.84348	5.75197	5.66161	5.93384	5.78196	5.90499	5.54125	5.96269	0.938544	0.828037	0.846326	1.04081
12770638	ENSBTAT00000022212	PTRH2	chr19	0.677394	0.0359089	0.535894	8.48013	8.53379	8.36194	8.65198	8.29506	8.66521	8.42883	8.63875	1.03789	0.817882	1.09715	0.981831
12804010	NM_001105643	H2B	chr23	0.13928	0.036085	0.834083	6.92615	7.39667	6.81546	7.50736	6.61239	7.23991	7.01852	7.77481	1.38561	0.619038	1.32513	1.44885
12718593	NM_001075264	ARFGAP1	chr13	0.592138	0.0362396	0.0471316	6.18387	6.11001	5.99254	6.30134	6.17474	6.193	5.81034	6.40969	0.950096	0.80731	0.776793	1.16206
12849983	ENSBTAT00000064324	ABCB8	chr4	0.571382	0.0363031	0.954877	6.37403	6.30865	6.21208	6.47059	6.24802	6.50003	6.17614	6.44115	0.955694	0.835952	0.951396	0.960011
12884731	NM_001206319	CRTC1	chr7	0.796018	0.0363736	0.331241	5.27244	5.21122	5.50781	4.97585	5.42172	5.12315	5.59389	4.82854	0.958452	1.44589	1.12675	0.815295
12759413	NM_001206280	KLK5	chr18	0.219309	0.0364761	0.207999	6.88778	7.29289	6.7287	7.45196	6.31827	7.45729	7.13914	7.44664	1.32419	0.605728	1.76648	0.992646
12757427	NM_001046227	MGC137708	chr18	0.513938	0.0366752	0.12522	6.25652	6.12672	5.96998	6.41326	6.19218	6.32087	5.74778	6.50566	0.913958	0.735458	0.734891	1.13666
12826998	NM_001192980	SIRT1	chr28	0.911126	0.0368705	0.451091	9.87153	9.86149	9.96724	9.76578	10.0064	9.73662	9.92805	9.79493	0.99307	1.14987	0.94712	1.04125
12884038	NM_001075301	TMEM59L	chr7	0.471524	0.0370106	0.148954	5.31049	5.38907	5.471	5.22856	5.35092	5.27006	5.59108	5.18707	1.05598	1.18299	1.18112	0.944098
12879700	NM_001102072	AKAP8	chr7	0.315785	0.0370463	0.236946	7.02765	7.14739	6.95602	7.21901	6.96719	7.08811	6.94486	7.34991	1.08654	0.833359	0.984643	1.19897
12907767	NM_001034348	SYAP1	chrX	0.646379	0.0371255	0.589048	7.27295	7.3447	7.48325	7.1344	7.40508	7.14082	7.56142	7.12798	1.05099	1.27355	1.11446	0.991137
12850767	NM_001083453	VPS41	chr4	0.96049	0.037543	0.946694	7.42315	7.41531	7.24263	7.59583	7.24126	7.60504	7.244	7.58662	0.994582	0.782844	1.0019	0.987317
12819469	NM_001101943	SHOC2	chr26	0.355191	0.0375954	0.264621	7.39557	7.54136	7.64203	7.2949	7.48063	7.31052	7.80343	7.27929	1.10633	1.27202	1.25075	0.978588
12910077	NM_001076309	FAM3A	chrX	0.0735667	0.0376262	0.539942	5.07539	4.82957	5.09797	4.80699	5.18068	4.9701	5.01526	4.64388	0.843339	1.22347	0.891673	0.797625
12907005	ENSBTAT00000010165 // ENSBTAT00000010165	ZFY // ZFX	chrX	0.759479	0.0376483	0.329888	8.2847	8.34134	8.51911	8.10694	8.39941	8.17	8.63881	8.04388	1.04004	1.33069	1.1805	0.916293
12789126	NM_175808	CPSF2	chr21	0.736172	0.0376906	0.343301	8.75795	8.79104	8.66515	8.88384	8.60148	8.91442	8.72883	8.85326	1.0232	0.859347	1.09229	0.958488
12766709	ENSBTAT00000064066	C19H17orf96	chr19	0.8042	0.0378531	0.0337119	5.71344	5.75296	5.91067	5.55574	6.07299	5.35388	5.74834	5.75759	1.02777	1.27892	0.798489	1.3229
12724180	NM_173997	ARFGEF1	chr14	0.141536	0.037876	0.473556	7.29052	7.42135	7.45167	7.2602	7.4173	7.16374	7.48604	7.35666	1.09492	1.14193	1.04879	1.14308
12788410	ENSBTAT00000064971	CEP72	chr20	0.491715	0.0379946	0.475734	5.417	5.30711	5.18548	5.53864	5.1834	5.6506	5.18756	5.42667	0.926661	0.782868	1.00289	0.856231
12723136	NM_001034619	ANKRD46	chr14	0.456162	0.0380625	0.775754	5.46235	5.67106	5.87564	5.25777	5.73169	5.193	6.01959	5.32254	1.15566	1.5346	1.22086	1.09394
12772785	ENSBTAT00000028387	RSAD1	chr19	0.271981	0.0380736	0.294882	5.09466	4.98057	5.15097	4.92426	5.26232	4.92701	5.03962	4.92151	0.923959	1.17016	0.856959	0.996199
12795525	NM_001035295	RAD18	chr22	0.561533	0.0380797	0.876456	7.09245	7.18788	7.32208	6.95825	7.28708	6.89782	7.35709	7.01867	1.06838	1.28685	1.04972	1.08738
12686370	NM_001101197	PSMD2	chr1	0.331106	0.0381273	0.77342	9.73164	9.59763	9.51355	9.81571	9.56098	9.90229	9.46612	9.72913	0.911293	0.811038	0.936362	0.886895
12728405	ENSBTAT00000024789	CWF19L2	chr15	0.988378	0.0385056	0.82156	7.07794	7.08045	6.88757	7.27082	6.86683	7.28905	6.90831	7.2526	1.00174	0.766708	1.02917	0.975048
12840869	NM_001113242	ERI3	chr3	0.0766755	0.0386164	0.707948	5.59854	6.02752	5.55763	6.06844	5.29991	5.89717	5.81534	6.2397	1.34628	0.701828	1.42942	1.26798
12770131	ENSBTAT00000015560	SAP30BP	chr19	0.881552	0.0386352	0.395178	8.0263	8.0465	7.88607	8.18673	7.93426	8.11833	7.83787	8.25512	1.0141	0.811882	0.93537	1.09946
12892274	NR_031369	MIRLET7D	chr8	0.768255	0.038731	0.775991	5.02476	5.10519	4.76284	5.36711	4.68379	5.36573	4.84188	5.3685	1.05733	0.657801	1.1158	1.00192
12706740	NM_001076889	NRBP1	chr11	0.588195	0.038789	0.689818	8.38921	8.27563	8.10107	8.56377	8.19962	8.57879	8.00251	8.54875	0.924293	0.725624	0.872292	0.979393
12760151	NM_001083534	ZNF583	chr18	0.130732	0.0388108	0.62253	5.48219	6.11952	5.35058	6.25112	4.9315	6.03287	5.76966	6.46937	1.55545	0.535686	1.78777	1.35331
12875145	NM_001083725	HNRPDL	chr6	0.820469	0.0388443	0.458998	9.99311	10.0021	9.95368	10.0416	9.93436	10.0519	9.973	10.0312	1.00626	0.940907	1.02714	0.985807
12895626	NM_001078153	CDC26	chr8	0.236097	0.0389023	0.728415	7.16851	7.39578	7.07449	7.4898	6.92824	7.40878	7.22074	7.57081	1.17061	0.749863	1.22476	1.11886
12845704	ENSBTAT00000020250	EIF2C4	chr3	0.173081	0.0389197	0.0467963	5.66811	5.45833	5.72867	5.39777	5.99203	5.3442	5.46532	5.45134	0.864669	1.2578	0.694137	1.0771
12678862	NR_001576	TERC	chr1	0.392258	0.0391382	0.658171	8.27686	8.10994	8.40664	7.98016	8.5329	8.02083	8.28039	7.93949	0.890739	1.34395	0.839435	0.945178
12763319	NM_001192395	MRPL10	chr19	0.565339	0.0393799	0.934204	8.29639	8.39915	8.15143	8.54411	8.10738	8.48539	8.19547	8.60283	1.07383	0.761712	1.06296	1.08481
12757226	NM_001077919	BCNT2	chr18	0.787934	0.0393839	0.106985	8.68704	8.71483	8.58699	8.81489	8.48635	8.88774	8.68764	8.74203	1.01945	0.853881	1.14972	0.903934
12780595	NM_001206660	NCL	chr2	0.889447	0.0394468	0.346191	11.2175	11.212	11.1713	11.2582	11.1552	11.2798	11.1873	11.2367	0.99621	0.941493	1.02255	0.970551
12886113	ENSBTAT00000000317	RUFY1	chr7	0.717884	0.0394506	0.108262	6.16208	6.22374	6.38091	6.00491	6.49271	5.83145	6.26912	6.17836	1.04367	1.29775	0.856435	1.27183
12786390	NM_001109802	PRKAA1	chr20	0.970622	0.0395905	0.651504	6.84095	6.83519	7.01063	6.66551	7.04896	6.63294	6.9723	6.69808	0.996014	1.27026	0.948251	1.04618
12786589	NM_001193092	BRD9	chr20	0.641966	0.0396349	0.809001	6.18755	6.12691	6.01391	6.30054	6.02851	6.34659	5.99931	6.2545	0.958838	0.819814	0.979967	0.938166
12902214	NM_001163777	NGFRAP1	chrX	0.129657	0.0397898	0.109218	6.9459	6.33259	7.06879	6.2097	7.0499	6.8419	7.08769	5.5775	0.653696	1.8139	1.02654	0.416272
12855916	ENSBTAT00000013799	PODXL	chr4	0.0728055	0.0398558	0.122608	6.76802	6.58351	6.56829	6.78323	6.73885	6.79718	6.39774	6.76928	0.87995	0.861584	0.789431	0.980849
12821842	NM_001035060	SFXN4	chr26	0.10157	0.0399082	0.0791262	6.26137	6.57366	6.21649	6.61855	6.2289	6.29385	6.20407	6.94325	1.24167	0.756775	0.982935	1.56852
12815439	NM_001075174	CLN3	chr25	0.651189	0.0399402	0.314859	7.29045	7.36127	7.15401	7.49771	7.03885	7.54205	7.26916	7.45337	1.05031	0.788015	1.17309	0.940386
12710062	NM_001034580	KIAA1704	chr12	0.965737	0.0400682	0.48091	7.05396	7.05988	6.90533	7.20851	6.95133	7.15659	6.85933	7.26043	1.00411	0.810464	0.938222	1.07463
12869693	ENSBTAT00000065725	LOC100336936	chr6	0.322356	0.0400813	0.307479	7.09099	6.90296	6.79128	7.20268	6.98234	7.19964	6.60021	7.20571	0.877803	0.751894	0.767306	1.00421
12731936	NM_001193062	ARHGAP1	chr15	0.447986	0.0401003	0.0770715	8.13266	8.28413	8.4259	7.99088	8.53414	7.73118	8.31767	8.25059	1.1107	1.35193	0.860668	1.43337
12743852	XM_615615	SH3D19	chr17	0.922344	0.0401497	0.171826	5.41443	5.38647	5.08516	5.71575	4.8972	5.93167	5.27311	5.49983	0.980806	0.64591	1.29766	0.741317
12732462	NM_001192605	MRE11A	chr15	0.496571	0.0403294	0.639176	7.84235	7.92062	7.75598	8.00699	7.68996	7.99474	7.822	8.01925	1.05575	0.840308	1.09584	1.01713
12801691	NM_001101936	KIFC1	chr23	0.532017	0.0404626	0.410215	7.3498	7.2906	7.21688	7.42352	7.28567	7.41393	7.14809	7.43311	0.959793	0.866551	0.909038	1.01338
12795267	NM_001101076	RUVBL1	chr22	0.0550166	0.0404739	0.478626	7.94862	8.25581	7.93679	8.26765	7.83703	8.06022	8.03654	8.47508	1.23729	0.795062	1.14831	1.33317
12829238	---	---	chr29	0.737123	0.0406818	0.121603	6.05385	6.01802	6.1527	5.91917	6.08488	6.02281	6.22052	5.81553	0.975476	1.17571	1.09857	0.86617
12907197	NM_174338	FUNDC2	chrX	0.144353	0.0407121	0.896426	9.59941	9.38464	9.64778	9.33627	9.74591	9.4529	9.54965	9.21963	0.861686	1.24101	0.872811	0.850703
12854021	NM_001083677	GIMAP1	chr4	0.742306	0.0412088	0.291207	5.79394	5.84158	5.97585	5.65967	6.02975	5.55812	5.92195	5.76122	1.03358	1.24503	0.927997	1.15117
12727296	ENSBTAT00000027334	FAM160A2	chr15	0.732712	0.0413257	0.167944	5.88611	5.93442	6.06447	5.75607	6.1407	5.63152	5.98824	5.88061	1.03405	1.23834	0.899713	1.18845
12788328	NM_001099137	SRD5A1	chr20	0.194458	0.0414016	0.789865	5.34782	5.63306	5.2569	5.72397	5.08575	5.60989	5.42806	5.83805	1.21861	0.723434	1.26778	1.17134
12813017	NM_001101104	AMDHD2	chr25	0.16861	0.0414639	0.250105	6.13947	5.94087	5.88749	6.19285	6.06899	6.20996	5.706	6.17573	0.871391	0.809246	0.777553	0.976552
12898392	NM_001191540	STXBP5	chr9	0.651304	0.0415401	0.638866	6.411	6.51253	6.70601	6.21752	6.70797	6.11402	6.70405	6.32101	1.07291	1.40298	0.997286	1.15427
12805084	NM_001034276	TAF11	chr23	0.461007	0.041668	0.631278	7.76487	7.62239	7.48479	7.90247	7.60218	7.92756	7.36741	7.87738	0.905961	0.748628	0.849821	0.965811
12723962	NM_001037623	POLR2K	chr14	0.303041	0.0417334	0.388837	8.37513	8.55246	8.27936	8.64823	8.11689	8.63337	8.44183	8.66309	1.13079	0.77439	1.25262	1.02082
12793233	XM_002696583	BLM	chr21	0.377475	0.0417903	0.521955	8.50229	8.38991	8.58307	8.30912	8.67979	8.32478	8.48636	8.29346	0.92506	1.20912	0.87452	0.978519
12754960	BC123585	ZNF829	chr18	0.830004	0.0417919	0.111944	6.53092	6.60646	6.95164	6.18574	6.62276	6.43909	7.28052	5.93239	1.05375	1.70043	1.57764	0.703832
12891600	NM_001046491	MOB3B	chr8	0.602007	0.0418235	0.07263	5.8252	5.89941	6.01659	5.70802	5.84547	5.80493	6.18771	5.61111	1.05278	1.23848	1.26772	0.874285
12832705	NM_001040487	EEF1G	chr29	0.657227	0.0419143	0.436044	11.127	11.1089	11.0738	11.162	11.0669	11.187	11.0808	11.1371	0.987578	0.940697	1.00963	0.966005
12715372	NM_001081721	TCF15	chr13	0.00217358	0.0419393	0.299212	5.89929	5.60371	5.84111	5.6619	5.94541	5.85317	5.7368	5.47062	0.814746	1.13226	0.865369	0.767084
12789186	NM_001014982	NDN	chr21	0.575427	0.0419629	0.297414	6.10254	6.19267	6.32185	5.97336	6.19189	6.01319	6.45181	5.93353	1.06447	1.27323	1.19741	0.946283
12685545	NM_001105403	IFT57	chr1	0.174543	0.0419756	0.724024	7.37074	7.0757	6.99371	7.45273	7.17854	7.56294	6.80888	7.34252	0.815048	0.727482	0.773964	0.858314
12737294	NM_001083770	C16H1orf95	chr16	0.825994	0.0424132	0.255798	5.02775	5.00803	4.9206	5.11518	4.98246	5.07305	4.85875	5.15732	0.986425	0.873828	0.917825	1.06015
12761166	NM_174671	SLC25A11	chr19	0.245958	0.0425079	0.217498	6.76207	7.00713	6.66036	7.10884	6.66844	6.8557	6.65228	7.36198	1.18514	0.732815	0.988863	1.42038
12816068	NM_001045996	MRPL28	chr25	0.452637	0.0426302	0.566833	7.82332	7.71731	7.61866	7.92197	7.63139	8.01524	7.60592	7.8287	0.929156	0.810387	0.982498	0.878711
12833118	ENSBTAT00000012489	WDR74	chr29	0.772435	0.0426639	0.0751639	6.84941	6.80927	6.67908	6.97961	6.56929	7.12953	6.78887	6.82968	0.972561	0.811959	1.16439	0.812332
12893230	NM_001101069	IARS	chr8	0.919732	0.0427975	0.63179	8.42652	8.43648	8.32445	8.53854	8.34324	8.5098	8.30567	8.56729	1.00693	0.862089	0.974294	1.04065
12709498	NM_001098939	VPS36	chr12	0.896866	0.0428462	0.3918	7.16012	7.11983	6.80344	7.47651	6.68895	7.6313	6.91794	7.32173	0.972459	0.627171	1.17201	0.806883
12694781	XM_871774	DUOXA2	chr10	0.0805977	0.0428617	0.331588	9.05179	8.85611	9.06934	8.83856	9.2197	8.88388	8.91898	8.79324	0.873163	1.17347	0.811847	0.939111
12888223	NM_001098473	B3GNT3	chr7	0.788668	0.0429177	0.891098	5.88324	5.82859	6.07638	5.63544	6.11765	5.64882	6.03511	5.62207	0.962827	1.35748	0.944391	0.981623
12895985	NM_001206857	PTAR1	chr8	0.0207854	0.0431268	0.782375	4.97579	5.60238	5.02073	5.55744	4.74176	5.20983	5.29971	5.90505	1.54391	0.689341	1.47218	1.61914
12806154	NM_001192735	ALDH5A1	chr23	0.889422	0.0431704	0.427584	6.67387	6.69875	6.49292	6.87969	6.55216	6.79557	6.43368	6.96382	1.01739	0.764837	0.921155	1.12369
12861154	NM_001035408	GGA1	chr5	0.639241	0.0432164	0.624338	6.33824	6.26167	6.12404	6.47587	6.12231	6.55417	6.12576	6.39758	0.948309	0.783585	1.00239	0.897144
12860018	ENSBTAT00000026418	TAB1	chr5	0.796659	0.0432921	0.267025	5.94371	5.89094	5.69632	6.13833	5.6069	6.28053	5.78575	5.99614	0.964084	0.736109	1.13198	0.821089
12684800	NM_001083694	SON	chr1	0.472411	0.0433203	0.0113034	9.65781	9.70754	9.60855	9.75681	9.48701	9.82862	9.73009	9.68499	1.03507	0.902337	1.18352	0.905239
12796738	NM_001076226	LHFPL4	chr22	0.208833	0.043496	0.53225	5.98442	6.28807	6.3904	5.88209	6.16456	5.80428	6.61624	5.9599	1.23426	1.42239	1.36763	1.11391
12694690	XM_592093	WDR36	chr10	0.951664	0.0436617	0.581401	9.01265	9.01951	8.89408	9.13808	8.8593	9.16599	8.92885	9.11016	1.00477	0.844402	1.04939	0.962039
12789156	ENSBTAT00000005307	SERPINA5	chr21	0.805259	0.0437946	0.645136	5.27137	5.32212	5.51831	5.07519	5.54044	5.0023	5.49617	5.14807	1.0358	1.35954	0.969775	1.10633
12699636	NM_001103091	LTBP1	chr11	0.509304	0.0440314	0.205639	5.58395	5.46109	5.3236	5.72144	5.26497	5.90293	5.38223	5.53996	0.918369	0.758992	1.08467	0.777562
12797616	NM_001142967	ATG7	chr22	0.38201	0.0440358	0.362546	6.78408	6.8713	6.93373	6.72165	6.84465	6.72351	7.02281	6.71979	1.06232	1.15836	1.13144	0.997425
12864163	ENSBTAT00000012570	ATP2B1	chr5	0.464902	0.0440697	0.832015	8.68255	8.61048	8.54133	8.75169	8.58774	8.77735	8.49492	8.72604	0.951274	0.864319	0.937687	0.965057
12772286	ENSBTAT00000026738	LLGL2	chr19	0.172722	0.0442527	0.788814	5.26425	5.53002	5.19386	5.60041	5.08634	5.44217	5.30139	5.75865	1.20228	0.754428	1.16074	1.24529
12709414	NM_001038064	GTF2F2	chr12	0.0635503	0.0445752	0.00533798	7.8998	8.07275	8.08083	7.89173	8.13407	7.66553	8.02758	8.11792	1.12736	1.14005	0.928843	1.36831
12741467	NM_001080356	METTL18	chr16	0.423091	0.0447029	0.242807	7.84489	8.06689	7.66181	8.24996	7.38706	8.30271	7.93656	8.19722	1.16635	0.665193	1.46357	0.929484
12884149	NM_001097996	CDC25C	chr7	0.778282	0.0447131	0.469611	7.19497	7.14853	7.34834	6.99516	7.3115	7.07843	7.38518	6.91188	0.968326	1.27738	1.0524	0.890972
12834190	NM_001035348	TMEM135	chr29	0.465368	0.0447232	0.831534	5.19785	5.3782	5.55061	5.02545	5.48651	4.9092	5.61471	5.14169	1.13316	1.4391	1.09293	1.17486
12711745	NM_001205739	EBPL	chr12	0.809564	0.0447859	0.971755	6.40116	6.32001	6.00003	6.72113	6.03465	6.76766	5.96542	6.6746	0.945304	0.606638	0.953141	0.937531
12890007	NM_001192260	FSD1L	chr8	0.521945	0.0448633	0.825219	7.18201	7.32321	7.01795	7.48728	6.97155	7.39247	7.06434	7.58209	1.10282	0.722298	1.06643	1.14046
12826135	BC146161	C28H10orf35	chr28	0.715119	0.0449436	0.845148	6.20796	6.13678	5.96398	6.38076	5.98056	6.43537	5.94741	6.32616	0.951857	0.749093	0.977284	0.927091
12854626	BC123558	MTERF	chr4	0.781113	0.0450244	0.562117	5.79547	5.7543	5.93324	5.61653	5.91071	5.68022	5.95578	5.55283	0.971872	1.24549	1.03173	0.915484
12697375	ENSBTAT00000005527	SYNDIG1L	chr10	0.0851882	0.0450419	0.44113	5.01848	4.93296	4.92505	5.02638	4.98622	5.05073	4.86388	5.00203	0.942447	0.932172	0.918701	0.966806
12690350	NM_001256581	ARID4A	chr10	0.570783	0.04509	0.0317494	6.49828	6.38487	6.22863	6.65452	6.05482	6.94174	6.40244	6.36731	0.924402	0.744378	1.27246	0.671548
12753447	NM_001104994	THAP11	chr18	0.00593439	0.0451274	0.0579213	6.96288	7.37023	7.02695	7.30616	6.9545	6.97127	7.0994	7.64106	1.32625	0.824038	1.10566	1.59085
12687070	NM_001076975	IL10RB	chr1	0.752391	0.045288	0.596482	5.31853	5.24558	5.52881	5.03531	5.50389	5.13317	5.55372	4.93744	0.950693	1.40786	1.03514	0.873132
12906365	NM_001105656	LOC100126054	chrX	0.641366	0.0453602	0.29391	5.24514	4.97423	5.72895	4.49043	5.55479	4.93549	5.90311	4.04536	0.828798	2.35957	1.27308	0.539563
12907269	ENSBTAT00000023619	SMC1A	chrX	0.734861	0.0454223	0.158385	8.54344	8.49063	8.68329	8.35079	8.59632	8.49056	8.77025	8.21101	0.964057	1.25919	1.12813	0.823849
12904893	NM_001192783	ABCB7	chrX	0.51315	0.0455409	0.0574499	6.94293	7.09431	7.26404	6.7732	6.95667	6.92918	7.5714	6.61722	1.11064	1.40526	1.53127	0.80555
12890108	NM_001046100	ZCCHC7	chr8	0.382912	0.0455889	0.612525	6.84411	6.69007	6.9532	6.58098	6.98587	6.70235	6.92052	6.45961	0.898729	1.29434	0.955712	0.845143
12905770	---	---	chrX	0.0990731	0.0456541	0.397571	6.48676	7.43923	7.55239	6.3736	7.31256	5.66097	7.79223	7.08624	1.93518	2.26387	1.39443	2.68565
12777221	NM_001035361	RBMS1	chr2	0.274341	0.045844	0.875339	6.75005	6.57153	6.49006	6.83152	6.56675	6.93335	6.41337	6.72969	0.883607	0.789242	0.89914	0.868342
12823120	ENSBTAT00000023684	BNIP3	chr26	0.36001	0.0458945	0.578415	8.51568	8.33435	8.63326	8.21678	8.66935	8.36202	8.59717	8.07154	0.881889	1.33467	0.951198	0.817629
12716280	NM_001192810	EPC1	chr13	0.0219266	0.0460142	0.0714095	7.21736	7.51785	7.23955	7.49566	6.975	7.45972	7.50411	7.5316	1.23157	0.837345	1.44304	1.05109
12765996	ENSBTAT00000055247	HIC1	chr19	0.401446	0.0461208	0.897459	5.30073	5.19361	5.3815	5.11284	5.42693	5.17453	5.33608	5.05114	0.928441	1.20469	0.938972	0.918029
12850474	NM_001130931	NUP205	chr4	0.458423	0.0461256	0.150768	7.51178	7.43633	7.36672	7.58139	7.47937	7.54419	7.25407	7.61859	0.949048	0.861744	0.855419	1.05293
12881643	NM_001035454	MRPL22	chr7	0.421297	0.0463119	0.882955	8.8925	9.03768	8.77514	9.15503	8.6894	9.0956	8.86089	9.21447	1.10587	0.768494	1.12622	1.08588
12793059	NM_001046331	SNX6	chr21	0.151409	0.0463158	0.980486	5.47679	5.82046	5.89496	5.4023	5.72596	5.22763	6.06396	5.57696	1.26898	1.40704	1.264	1.27397
12751655	NM_001102012	TBC1D17	chr18	0.459905	0.0463535	0.787174	6.07274	6.15971	5.99223	6.24022	5.96452	6.18097	6.01995	6.29947	1.06213	0.842071	1.03917	1.0856
12871178	NM_001101096	NUDT9	chr6	0.595949	0.0463791	0.508506	6.16337	6.28384	5.98321	6.464	5.84767	6.47906	6.11875	6.44894	1.0871	0.716584	1.20672	0.979334
12862594	ENSBTAT00000037671	DNAL4	chr5	0.605597	0.0464783	0.0635064	5.3448	5.47508	5.14308	5.6768	5.32451	5.3651	4.96166	5.98851	1.09451	0.690772	0.777628	1.54051
12833833	NM_001034512	PUS3	chr29	0.135335	0.0465178	0.918459	7.41558	7.65388	7.37128	7.69818	7.26001	7.57115	7.48255	7.82521	1.17961	0.797248	1.16679	1.19256
12910364	NM_001077034	BEX2	chrX	0.34156	0.0465979	0.265274	7.59698	7.30203	7.77397	7.12505	7.74776	7.44621	7.80017	6.80389	0.815099	1.56799	1.037	0.64068
12870571	NM_001097991	PITX2	chr6	0.987445	0.0465994	0.253319	6.44185	6.44406	6.59251	6.2934	6.67358	6.21011	6.51144	6.37669	1.00154	1.23039	0.893698	1.12239
12852744	NR_030875	MIR1843	chr4	0.946829	0.0467653	0.479854	6.25125	6.23774	6.45946	6.02953	6.39405	6.10846	6.52488	5.95059	0.990674	1.34717	1.09493	0.89635
12820472	NM_001076902	FAM45A	chr26	0.746508	0.0468814	0.0763879	8.40691	8.44545	8.30003	8.55234	8.39174	8.42209	8.20831	8.68259	1.02707	0.83955	0.880606	1.19789
12900982	NM_001206087	PPIL4	chr9	0.872494	0.0469259	0.345837	6.31474	6.34422	6.52405	6.13491	6.59709	6.03239	6.451	6.23743	1.02064	1.30961	0.903698	1.15272
12770482	NM_001034493	ICT1	chr19	0.610863	0.0469877	0.447553	8.25517	8.32896	8.13905	8.44508	8.15751	8.35282	8.12059	8.53734	1.05248	0.808863	0.974735	1.13643
12772810	NM_001038579	SKA2	chr19	0.0894445	0.0471446	0.672044	7.36817	7.69107	7.33758	7.72166	7.13761	7.59872	7.53754	7.8446	1.25085	0.766265	1.31944	1.18582
12877550	NM_001038030	SGTA	chr7	0.629605	0.0472567	0.00258644	8.60038	8.54449	8.69459	8.45028	8.92512	8.27564	8.46406	8.62492	0.961999	1.18453	0.726448	1.27393
12846824	NM_001081608	DEM1	chr3	0.228942	0.047382	0.517447	6.99803	6.61585	6.47883	7.13505	6.56881	7.42726	6.38886	6.84285	0.767278	0.634539	0.882731	0.666925
12690566	NM_001046361	PAPD4	chr10	0.918869	0.0475002	0.785332	9.77517	9.7839	9.68906	9.87001	9.67303	9.87732	9.7051	9.8627	1.00606	0.882125	1.02248	0.989913
12823362	XM_003587951	LOC100138651	chr27	0.0760411	0.0475426	0.211634	10.5082	10.6659	10.4978	10.6763	10.3648	10.6515	10.6308	10.701	1.11553	0.883645	1.20241	1.03493
12739608	NM_001046193	ATF3	chr16	0.366619	0.0475462	0.199118	7.21782	7.36571	7.12096	7.46257	7.15362	7.28201	7.0883	7.64313	1.10795	0.789162	0.955733	1.28442
12837160	NM_001075306	ANP32E	chr3	0.440128	0.0477121	0.381297	9.16011	9.06578	8.9852	9.24069	8.97873	9.34149	8.99167	9.13989	0.936709	0.837702	1.00901	0.869585
12756020	ENSBTAT00000027497	NOB1	chr18	0.311032	0.0477806	0.0521265	8.24093	8.08199	7.99863	8.32429	8.23748	8.24438	7.75977	8.40421	0.895682	0.79793	0.718118	1.11715
12733180	NM_001105630	NUP160	chr15	0.781462	0.0478881	0.684858	8.5701	8.59631	8.48372	8.68269	8.48981	8.65039	8.47763	8.71498	1.01833	0.871175	0.99159	1.04579
12741155	NM_001080320	TATDN3	chr16	0.905734	0.0481716	0.457568	6.58603	6.54503	6.20106	6.92999	6.09186	7.08019	6.31026	6.7798	0.971985	0.603351	1.16344	0.812037
12883851	NM_001082602	DDX41	chr7	0.521716	0.0486467	0.31967	6.60751	6.72103	6.47935	6.84919	6.51158	6.70344	6.44713	6.99494	1.08187	0.773871	0.956305	1.22391
12807175	XM_002697352	MUC21	chr23	0.429075	0.0488935	0.879157	5.85607	5.76434	5.6897	5.93071	5.7443	5.96785	5.63509	5.89358	0.938392	0.846149	0.927098	0.949823
12902894	ENSBTAT00000010033	IL2RG	chrX	0.904195	0.0489512	0.0974217	6.52509	6.57068	6.9451	6.15067	7.25047	5.79972	6.63974	6.50163	1.0321	1.73439	0.654865	1.62666
12848415	NM_001191332	ARMC10	chr4	0.762796	0.049012	0.857223	7.98696	7.94977	8.0974	7.83933	8.12707	7.84685	8.06773	7.8318	0.97455	1.19588	0.959702	0.989627
12906479	NM_001242584	IGBP1	chrX	0.700624	0.0493437	0.858022	5.6495	5.71461	5.85892	5.50518	5.84148	5.45751	5.87635	5.55286	1.04616	1.27787	1.02446	1.06832
12747918	NM_001034727	XBP1	chr17	0.911162	0.0493569	0.555291	7.06204	7.03673	7.28685	6.81192	7.23223	6.89185	7.34146	6.73199	0.982607	1.38985	1.07866	0.895111
12902782	---	---	chrX	0.0750866	0.0493867	0.421497	6.22661	7.21812	7.27608	6.16865	6.99516	5.45805	7.55699	6.87924	1.98826	2.15462	1.47614	2.67806
12723454	NM_001076327	RGS20	chr14	0.870957	0.0494415	0.916512	5.29222	5.25462	5.51548	5.03136	5.54641	5.03803	5.48456	5.02469	0.974279	1.39874	0.958037	0.990796
12752709	NM_001205993	BCL3	chr18	0.695903	0.049485	0.34287	6.74307	6.67414	6.89265	6.52455	7.01176	6.47437	6.77353	6.57474	0.953346	1.29065	0.847787	1.07205
12760902	ENSBTAT00000028048	PSMC5	chr19	0.666853	0.0495536	0.443836	9.96262	10.0025	9.88603	10.0791	9.83044	10.0948	9.94162	10.0633	1.028	0.874765	1.08011	0.978408
12735642	ENSBTAT00000006513	LOC515128	chr16	0.828958	0.0496219	0.226542	5.74022	5.71467	5.85098	5.60391	5.9369	5.54353	5.76505	5.66429	0.982449	1.18679	0.887701	1.08731
12907047	NM_001206514	FLNA	chrX	0.614011	0.0497683	0.428105	5.30778	5.37198	5.47232	5.20744	5.49096	5.1246	5.45368	5.29028	1.0455	1.20154	0.974491	1.12169
12886787	ENSBTAT00000065277	DMXL1	chr7	0.882917	0.0497776	0.25612	6.84008	6.82069	6.96785	6.69292	6.90125	6.7789	7.03444	6.60694	0.986653	1.20993	1.09671	0.887638
12854808	HQ589330	NOBOX	chr4	0.27129	0.0499509	0.695083	5.07653	5.19906	5.2518	5.02379	5.212	4.94107	5.2916	5.10651	1.08864	1.17122	1.05673	1.12151
12893218	NM_001034345	CCL19	chr8	0.347097	0.0500181	0.260699	7.3812	7.15097	7.51796	7.0142	7.77163	6.99076	7.2643	7.03764	0.852502	1.41791	0.703522	1.03303
12861509	NM_001101172	PEX26	chr5	0.597724	0.0500835	0.583605	5.46867	5.58028	5.74413	5.30482	5.63033	5.307	5.85793	5.30264	1.08044	1.35596	1.17088	0.996978
12761654	NM_001045909	SCPEP1	chr19	0.118023	0.050094	0.555542	8.52387	8.78784	8.82514	8.48656	8.74126	8.30647	8.90902	8.66665	1.20078	1.26451	1.12331	1.28359
12903114	ENSBTAT00000054439	EMD	chrX	0.480237	0.0502713	0.931812	7.71242	7.87051	8.02298	7.55995	7.93443	7.49041	8.11153	7.62949	1.11581	1.37844	1.13061	1.1012
12682365	NM_001193047	WWTR1	chr1	0.938218	0.0503484	0.115599	9.75762	9.75051	9.65852	9.84961	9.58695	9.92829	9.73008	9.77094	0.995084	0.875939	1.1043	0.896668
12879126	XM_002689171	STK11	chr7	0.291246	0.0503594	0.808116	5.9776	5.81451	6.05416	5.73795	6.11726	5.83794	5.99107	5.63796	0.89311	1.24506	0.916245	0.870559
12769871	ENSBTAT00000014625	SSH2	chr19	0.849197	0.0504262	0.258137	6.4008	6.43635	6.61313	6.22402	6.48752	6.31408	6.73875	6.13395	1.02494	1.30959	1.19022	0.882622
12721502	ENSBTAT00000054742	LOC100296978	chr14	0.339815	0.0505274	0.934127	10.346	10.5005	10.5892	10.2572	10.5186	10.1734	10.6599	10.3411	1.11302	1.25875	1.1029	1.12324
12878888	ENSBTAT00000002951	LOC512831	chr7	0.236542	0.0505931	0.19239	5.39536	5.19156	5.46861	5.11831	5.45774	5.33299	5.47947	4.90364	0.868256	1.27482	1.01518	0.742598
12744080	NM_001205773	KLHL22	chr17	0.911219	0.0508843	0.609275	5.56253	5.57293	5.47086	5.6646	5.44173	5.68333	5.49998	5.64587	1.00723	0.874334	1.0412	0.974372
12897800	NM_001034017	WASF1	chr9	0.211192	0.0511728	0.445294	6.59124	6.39405	6.65221	6.33309	6.69156	6.49093	6.61285	6.17525	0.872247	1.24757	0.946905	0.803475
12752785	NM_001034583	COG4	chr18	0.959602	0.0511767	0.406139	6.54918	6.55633	6.40642	6.69909	6.46208	6.63628	6.35075	6.7619	1.00496	0.816388	0.925736	1.09097
12813565	NM_001046368	C25H16orf62	chr25	0.561599	0.0512104	0.253229	6.38913	6.25308	6.07927	6.56294	6.28331	6.49495	5.87523	6.63092	0.910005	0.715158	0.753629	1.09883
12757293	NM_001101997	ZNF526	chr18	0.193184	0.051265	0.661175	5.61446	6.12998	5.47243	6.272	5.12994	6.09898	5.81493	6.44502	1.42951	0.574522	1.6077	1.27107
12706410	NM_001035365	DOLK	chr11	0.266082	0.0514171	0.131313	5.70593	5.86986	5.93764	5.63815	5.74255	5.6693	6.13272	5.607	1.12034	1.23071	1.31055	0.957734
12859437	NM_001017938	GTPBP1	chr5	0.833111	0.0517203	0.817901	6.35081	6.31956	6.18181	6.48857	6.18036	6.52127	6.18326	6.45586	0.978569	0.808455	1.00201	0.955674
12907694	NM_001206378	PIM2	chrX	0.257085	0.0519235	0.970853	5.36953	5.63838	5.74416	5.26374	5.6055	5.13356	5.88283	5.39392	1.20484	1.39516	1.21196	1.19778
12811336	NM_174207	TUFM	chr25	0.842881	0.0519982	0.582074	8.5819	8.56381	8.47858	8.66712	8.51285	8.65095	8.44431	8.6833	0.987538	0.877492	0.953602	1.02268
12751960	NM_001034528	TMEM86B	chr18	0.274259	0.0521446	0.0422975	5.25478	5.12535	5.30998	5.07015	5.24857	5.26099	5.3714	4.87931	0.914196	1.18086	1.08887	0.76754
12745126	XM_002694408	LOC100297914	chr17	0.630836	0.0521765	0.0088398	6.84577	6.89356	6.76734	6.97198	6.59808	7.09345	6.93661	6.85052	1.03368	0.867755	1.26446	0.845027
12789322	NM_001192054	PTPN9	chr21	0.743897	0.0521906	0.372963	5.2838	5.36175	5.07683	5.56872	5.14533	5.42226	5.00833	5.71517	1.05552	0.711095	0.909409	1.22511
12864199	ENSBTAT00000024961	CEP290	chr5	0.407103	0.0521958	0.550943	5.38541	5.5354	5.27566	5.64515	5.25433	5.51649	5.297	5.7738	1.10956	0.774059	1.03002	1.19524
12736670	NM_001099059	LYPLAL1	chr16	0.535125	0.0523539	0.24788	5.97224	6.16173	6.38025	5.75372	6.46476	5.47972	6.29574	6.02772	1.14036	1.54385	0.889445	1.46206
12717828	ENSBTAT00000021466	LOC100296926	chr13	0.787706	0.0528067	0.677288	5.18203	5.21723	5.06519	5.33407	5.07484	5.28922	5.05555	5.37892	1.0247	0.829964	0.986717	1.06415
12740151	BC148919	NVL	chr16	0.8728	0.0528157	0.328192	8.81675	8.80067	8.70536	8.91206	8.76324	8.87025	8.64748	8.95386	0.988916	0.86652	0.922893	1.05966
12727431	NM_001103237	SBF2	chr15	0.66412	0.0529112	0.833997	5.65683	5.74792	5.48716	5.91759	5.46354	5.85011	5.51078	5.98507	1.06518	0.742042	1.03328	1.09806
12882560	NM_001103108	RAVER1	chr7	0.863661	0.0529935	0.018478	7.31457	7.29218	7.43745	7.16929	7.61693	7.01221	7.25798	7.32638	0.984597	1.20427	0.77973	1.24329
12781179	XM_002685401	SPOPL	chr2	0.202092	0.053071	0.318262	7.41829	7.6659	7.3477	7.73649	7.12801	7.70856	7.56738	7.76442	1.18724	0.763767	1.35601	1.03948
12703031	NM_001076964	PMPCA	chr11	0.0615375	0.0530845	0.106414	5.71957	5.985	5.71442	5.99015	5.46877	5.97037	5.96007	6.00993	1.20199	0.826034	1.4057	1.0278
12797923	NM_177485	AMT	chr22	0.728238	0.0531754	0.25165	8.38666	8.3343	8.20593	8.51503	8.32016	8.45316	8.0917	8.5769	0.964359	0.807144	0.853549	1.08955
12797742	BC148985	RBM6	chr22	0.337053	0.0532392	0.54774	6.95612	6.82008	7.03154	6.74466	7.05736	6.85489	7.00573	6.63442	0.910011	1.22001	0.964851	0.858287
12700594	NM_001081591	SPAST	chr11	0.368926	0.0536043	0.184011	6.78089	6.93365	7.0294	6.68515	7.06773	6.49405	6.99107	6.87624	1.1117	1.26949	0.948252	1.30332
12761915	NM_001075246	METTL2B	chr19	0.356694	0.0537402	0.552498	7.02104	7.17715	6.92786	7.27033	6.7999	7.24218	7.05582	7.29848	1.11428	0.788686	1.19409	1.0398
12741933	NM_174153	PPID	chr17	0.987186	0.0537775	0.810541	8.81727	8.81595	8.73215	8.90107	8.72293	8.91162	8.74138	8.89052	0.999083	0.88951	1.01287	0.985481
12682890	ENSBTAT00000054299	ZNF560	chr1	0.252759	0.0537873	0.367252	6.09552	6.45011	6.58389	5.96175	6.26793	5.92311	6.89984	6.00038	1.27863	1.53916	1.54961	1.05503
12844155	BT026233	FAM40A	chr3	0.869072	0.0540652	0.559157	5.974	5.93667	5.72365	6.18702	5.8088	6.13921	5.63851	6.23483	0.974454	0.725292	0.888662	1.06853
12748619	XM_002695323	ZNF813	chr18	0.168949	0.0540749	0.238275	5.75915	6.02272	5.70078	6.0811	5.45693	6.06137	5.94462	6.10082	1.20045	0.768267	1.4022	1.02772
12862277	NM_001081618	NUDT4	chr5	0.742332	0.0540957	0.833707	9.89712	9.91934	9.83919	9.97728	9.83516	9.95908	9.84321	9.99548	1.01552	0.908721	1.00559	1.02555
12781086	NM_001192994	SF3B1	chr2	0.297884	0.0541415	0.327858	9.97517	9.91909	9.89297	10.0013	9.89471	10.0556	9.89124	9.94694	0.961877	0.927676	0.997593	0.927439
12890207	NM_001081587	RNF20	chr8	0.82871	0.0542505	0.159546	6.73346	6.76382	6.60527	6.89201	6.48826	6.97866	6.72228	6.80537	1.02127	0.819751	1.1761	0.886816
12892524	ENSBTAT00000028486 // ENSBTAT00000028486	LOC100336783 // ANP32B	chr8	0.610276	0.0544075	0.352958	5.55599	5.6128	5.47099	5.69781	5.49485	5.61713	5.44712	5.77849	1.04016	0.854513	0.967453	1.11834
12889637	NM_001035044	CCDC25	chr8	0.516709	0.0544779	0.822952	7.92634	8.07529	8.23386	7.76778	8.18493	7.66776	8.28278	7.86779	1.10876	1.38135	1.07018	1.14873
12819315	NM_001100316	PI4K2A	chr26	0.411364	0.0544946	0.830395	7.46095	7.30131	7.57745	7.1848	7.67787	7.24402	7.47703	7.12559	0.895251	1.3128	0.870044	0.921188
12842857	NM_174815	YBX1	chr3	0.956656	0.0544962	0.530465	11.3625	11.3654	11.3084	11.4195	11.2898	11.4352	11.3271	11.4038	1.00205	0.925888	1.02618	0.978487
12880444	NM_001034588	WDR18	chr7	0.386331	0.0547295	0.447006	7.15018	6.98778	6.88003	7.25794	7.0323	7.26806	6.72775	7.24781	0.893541	0.769553	0.809697	0.986066
12908896	NM_001037471	UXT	chrX	0.533245	0.0547995	0.877326	9.5789	9.46263	9.70989	9.33164	9.75371	9.40409	9.66608	9.25919	0.922574	1.29977	0.941069	0.904443
12899396	ENSBTAT00000010680 // ENSBTAT00000010680	LOC100337123 // RSPO3	chr9	0.662133	0.0550788	0.400512	7.68263	7.74558	7.8604	7.56782	7.76786	7.59741	7.95294	7.53823	1.0446	1.22483	1.13688	0.959813
12789163	ENSBTAT00000005300	PAPOLA	chr21	0.536849	0.0551425	0.709314	9.57652	9.62351	9.52302	9.67701	9.51365	9.63939	9.53239	9.71462	1.0331	0.898763	1.01307	1.05353
12683191	XM_002684816	LMLN	chr1	0.42374	0.0553505	0.696687	5.62116	5.8289	5.98651	5.46355	5.93286	5.30946	6.04016	5.61764	1.15488	1.4369	1.07721	1.23814
12751923	NM_001075748	CTCF	chr18	0.916078	0.0554713	0.218062	8.95332	8.94254	8.84389	9.05197	8.7847	9.12194	8.90308	8.98199	0.992552	0.865688	1.08552	0.90755
12834682	NM_001040563	HTATIP2	chr29	0.502545	0.0558078	0.374737	7.78492	7.6831	7.58096	7.88706	7.69964	7.8702	7.46229	7.90391	0.931859	0.808829	0.848305	1.02364
12753777	---	---	chr18	0.683497	0.056118	0.876669	5.36937	5.30005	5.1628	5.50662	5.21062	5.52811	5.11497	5.48512	0.953086	0.787952	0.93585	0.970638
12853297	NM_001001168	SEPT7	chr4	0.887857	0.056136	0.271933	10.2565	10.2481	10.1919	10.3127	10.1627	10.3503	10.221	10.2751	0.994187	0.919631	1.0413	0.949209
12817661	NM_001079779	KDELR2	chr25	0.22278	0.0561773	0.285833	10.1243	10.2868	10.3374	10.0736	10.3269	9.92166	10.3479	10.2256	1.11923	1.2006	1.01469	1.23453
12830597	NM_001205765	C29H11orf84	chr29	0.713778	0.0562079	0.369502	5.50316	5.45633	5.35067	5.60882	5.43198	5.57433	5.26936	5.64331	0.968067	0.836164	0.893401	1.04897
12813675	XM_003584022	CCP110	chr25	0.667725	0.0565783	0.924674	6.13085	6.24955	5.9113	6.4691	5.83891	6.42279	5.98369	6.51542	1.08576	0.679334	1.10556	1.06631
12749428	NM_174506	BCKDHA	chr18	0.225393	0.05689	0.148951	5.41391	5.52944	5.37767	5.56568	5.25045	5.57737	5.50489	5.55398	1.08337	0.877818	1.19287	0.983917
12699220	ENSBTAT00000063228	WDR85	chr11	0.492713	0.0571596	0.411386	5.17719	5.26143	5.09635	5.34227	5.00363	5.35075	5.18907	5.33379	1.06013	0.843278	1.13716	0.988309
12780223	NM_174227	ACVR2A	chr2	0.845895	0.0571641	0.0971327	7.82913	7.85652	7.70076	7.98489	7.80921	7.84906	7.59231	8.12072	1.01916	0.821237	0.860414	1.2072
12703373	ENSBTAT00000044161	C2orf28	chr11	0.211155	0.0571766	0.933647	7.02327	7.3076	6.94175	7.38912	6.79035	7.25619	7.09314	7.52206	1.21785	0.733374	1.23353	1.20236
12684748	NM_001206357	CLDND1	chr1	0.0757078	0.05723	0.0707093	8.4476	8.18056	8.17004	8.45813	8.43967	8.45553	7.9004	8.46072	0.831024	0.818987	0.68812	1.00361
12905613	NM_001256589	RBMX2	chrX	0.634547	0.0572711	0.310483	5.94234	6.15285	6.49259	5.60261	6.61484	5.26985	6.37034	5.93537	1.1571	1.85315	0.844106	1.58615
12844194	NM_001075505	OSBPL9	chr3	0.579927	0.0573443	0.642249	9.41359	9.38426	9.45207	9.34578	9.45444	9.37273	9.4497	9.31883	0.97988	1.07646	0.996715	0.963329
12876473	---	---	chr7	0.206139	0.0575062	0.0187075	6.21634	6.38798	6.16888	6.43543	5.91268	6.52	6.42509	6.35086	1.12634	0.831306	1.42643	0.889372
12802930	NM_001163939	TMEM63B	chr23	0.785803	0.0575855	0.448386	6.63263	6.58447	6.43031	6.78679	6.38668	6.87858	6.47395	6.69499	0.967171	0.781071	1.06236	0.880513
12864689	ENSBTAT00000009044	EIF4B	chr5	0.922414	0.0576988	0.0225775	10.0881	10.0836	10.0401	10.1316	9.98589	10.1902	10.0943	10.0729	0.996937	0.938573	1.07807	0.92191
12806780	XM_002702885	LOC616868	chr23	0.583996	0.0580525	0.149584	7.02773	7.21683	6.7769	7.46767	6.93845	7.11701	6.61534	7.81833	1.14005	0.619521	0.799341	1.62599
12902098	NM_174660	SLC25A6	chrU_7180002013958	0.246534	0.0581024	0.930584	10.0251	9.96377	10.0465	9.94238	10.0795	9.97082	10.0136	9.91395	0.958346	1.07486	0.955351	0.961351
12700742	NM_001205896	CNNM4	chr11	0.318997	0.0581671	0.0823533	5.94759	6.09222	6.16336	5.87645	5.96074	5.93445	6.36598	5.81846	1.10544	1.22002	1.3243	0.92275
12754412	XM_002695060	MAP3K10	chr18	0.641916	0.0583102	0.973356	5.41579	5.32413	5.1728	5.56712	5.21535	5.61623	5.13025	5.51801	0.938445	0.760849	0.942722	0.934187
12714592	ENSBTAT00000053246	ERGIC3	chr13	0.299904	0.0584715	0.0493618	8.87698	8.74788	8.68966	8.9352	8.88234	8.87162	8.49698	8.99878	0.914402	0.843499	0.765589	1.09214
12828142	NM_001075770	P4HA1	chr28	0.585925	0.0585409	0.32676	6.91562	6.79988	7.06978	6.64571	7.02235	6.80888	7.11721	6.48254	0.922909	1.3417	1.06796	0.797556
12828515	ENSBTAT00000016211	WAPAL	chr28	0.0727488	0.0585858	0.864914	9.31975	9.4136	9.31692	9.41643	9.26577	9.37373	9.36807	9.45913	1.06722	0.933351	1.07348	1.06099
12879253	XM_594479	LMNB2	chr7	0.162054	0.0587986	0.447092	5.81045	5.58172	5.53734	5.85483	5.59089	6.03002	5.48378	5.67965	0.853381	0.80246	0.928444	0.784386
12726906	NM_182655	TRIM21	chr15	0.0602251	0.0589538	0.52514	6.14018	5.46217	6.14208	5.46027	6.37217	5.9082	5.91199	5.01234	0.625024	1.60415	0.726896	0.537429
12756943	ENSBTAT00000020933	EML2	chr18	0.657348	0.059057	0.786328	5.50132	5.45388	5.37094	5.58426	5.3802	5.62245	5.36169	5.54608	0.967652	0.86255	0.987255	0.948438
12721746	NM_174734	RDH10	chr14	0.619652	0.0590592	0.104426	6.43023	6.29483	6.0907	6.63436	5.92814	6.93231	6.25326	6.3364	0.91042	0.686027	1.25277	0.661627
12843293	NM_001205565	THRAP3	chr3	0.451476	0.0591228	0.750901	9.7312	9.66689	9.61441	9.78369	9.6331	9.8293	9.59571	9.73808	0.956406	0.889284	0.974412	0.938733
12831896	NM_001113313	NRGN	chr29	0.507851	0.0593486	0.0878882	6.21526	6.05093	6.37932	5.88687	6.68198	5.74855	6.07666	6.0252	0.89234	1.40683	0.657326	1.21138
12846438	NM_001046404	UAP1	chr3	0.614739	0.0594229	0.834257	5.50291	5.38958	5.67025	5.22225	5.75039	5.25543	5.5901	5.18906	0.924449	1.36415	0.894843	0.955034
12768006	NM_001034216	PIGS	chr19	0.720994	0.0594557	0.43167	7.28497	7.21956	7.06974	7.43479	7.17502	7.39491	6.96447	7.47466	0.955678	0.776445	0.864208	1.05683
12893086	NM_001034294	VCP	chr8	0.982882	0.0594716	0.748036	8.89131	8.89322	8.80366	8.98087	8.78843	8.99419	8.81889	8.96755	1.00132	0.884412	1.02133	0.981701
12708565	NM_001205450	GEN1	chr11	0.251694	0.0595216	0.181886	6.68601	6.93322	6.59881	7.02042	6.33015	7.04187	6.86747	6.99897	1.18691	0.746592	1.45127	0.970697
12805437	XM_590178	SRPK1	chr23	0.688196	0.0596354	0.87956	8.92513	8.88735	8.99995	8.81254	9.02596	8.82431	8.97394	8.80077	0.974153	1.13872	0.964589	0.983811
12766674	NR_038105	LOC100196901	chr19	0.615813	0.0597538	0.156596	8.25616	8.17786	8.37201	8.06201	8.52487	7.98745	8.21915	8.13657	0.947175	1.23971	0.809038	1.1089
12801213	NM_001205537	MDFI	chr23	0.573791	0.05979	0.611174	5.23006	5.28522	5.16033	5.35495	5.15766	5.30246	5.16301	5.40744	1.03898	0.873806	1.00372	1.07548
12905536	NM_001206959	TMEM185A	chrX	0.330317	0.0598315	0.576075	6.14161	5.80247	6.31413	5.62995	6.58011	5.70312	6.04816	5.55678	0.790511	1.60679	0.691621	0.903541
12767405	NM_001033612	RAB34	chr19	0.2714	0.0601569	0.443356	5.8416	6.00342	5.77885	6.06617	5.75377	5.92943	5.80394	6.20291	1.1187	0.819424	1.03539	1.20872
12886767	NM_001034605	KXD1	chr7	0.308636	0.0607134	0.993478	7.89153	8.14365	8.25947	7.7757	8.13242	7.65064	8.38653	7.90076	1.19095	1.3984	1.1926	1.18931
12900145	NM_001205762	MED23	chr9	0.165253	0.0610203	0.959601	6.65294	6.88576	6.60804	6.93067	6.49575	6.81014	6.72033	7.05119	1.17513	0.799612	1.16843	1.18186
12821658	ENSBTAT00000006447	ABLIM1	chr26	0.494315	0.0611289	0.594846	6.2377	6.36136	6.47758	6.12148	6.46372	6.01167	6.49144	6.23128	1.0895	1.27996	1.0194	1.16442
12745837	NM_001045938	AP1B1	chr17	0.258377	0.061156	0.499808	7.79702	7.70351	7.83061	7.66992	7.90491	7.68913	7.75631	7.65071	0.937238	1.11782	0.902122	0.973721
12796209	NM_001075934	C22H3orf37	chr22	0.51825	0.061335	0.946989	6.8347	6.74038	6.93118	6.6439	6.97352	6.69587	6.88885	6.59192	0.936717	1.22034	0.942999	0.930478
12784489	NM_001076957	PNRC2	chr2	0.124397	0.0617353	0.708928	9.90969	9.67139	9.64295	9.93814	9.79002	10.0294	9.49587	9.8469	0.847742	0.814966	0.815556	0.881198
12795231	NM_001101925	TMCC1	chr22	0.403481	0.0619568	0.220175	6.23971	6.40382	6.51367	6.12987	6.55362	5.92581	6.47372	6.33393	1.12047	1.30478	0.946121	1.32696
12818013	NM_001205530	ATXN2L	chr25	0.747104	0.0620024	0.285354	8.58767	8.61658	8.69053	8.51371	8.72477	8.45056	8.65628	8.57687	1.02024	1.13038	0.953635	1.0915
12759707	---	---	chr18	0.499432	0.0622683	0.569024	5.55374	5.77032	5.9761	5.34796	5.7767	5.33078	6.17551	5.36513	1.16198	1.54558	1.31842	1.02409
12827367	NM_001191482	ZNF248	chr28	0.218329	0.0623319	0.727026	5.54515	5.78121	5.84775	5.4786	5.69699	5.3933	5.99851	5.56391	1.17777	1.29159	1.23244	1.12553
12909443	NM_001192984	AIFM1	chrX	0.146836	0.0625119	0.333765	7.38567	7.68852	7.73594	7.33826	7.48553	7.28581	7.98634	7.3907	1.23358	1.31739	1.41501	1.07542
12874260	NM_001100369	NAAA	chr6	0.0659741	0.0625432	0.0748767	5.45086	5.92902	5.93248	5.4474	5.92422	4.97749	5.94073	5.91731	1.39297	1.39966	1.01151	1.91829
12896953	NM_001075326	LTV1	chr9	0.548599	0.0626376	0.872727	8.07829	8.00435	8.16205	7.92059	8.18921	7.96738	8.1349	7.87379	0.950035	1.18219	0.963058	0.937188
12877624	NM_001102486	MATR3	chr7	0.786128	0.0627453	0.112174	9.91863	9.94182	9.84619	10.0143	9.76397	10.0733	9.92841	9.95523	1.0162	0.89003	1.12073	0.921423
12790554	XM_609164	RPP25	chr21	0.778298	0.0628607	0.356501	6.14614	6.09178	6.30874	5.92917	6.42605	5.86622	6.19143	5.99212	0.963021	1.30095	0.849907	1.09119
12883307	NM_174576	PIK3R2	chr7	0.692354	0.0630756	0.747253	5.89657	5.85083	5.76032	5.98708	5.76458	6.02856	5.75606	5.9456	0.968794	0.854556	0.994114	0.944118
12740634	XM_002693904	PPP1R15B	chr16	0.0188809	0.0630819	0.0191581	6.95337	7.19712	7.16844	6.98204	7.16811	6.73862	7.16878	7.22545	1.18407	1.13792	1.00046	1.40136
12796032	NM_001205908	XPC	chr22	0.674166	0.0631067	0.490501	5.71163	5.65627	5.55489	5.81301	5.53695	5.8863	5.57282	5.73973	0.96236	0.836173	1.02517	0.903398
12687540	NM_001114658	JMJD7	chr10	0.445235	0.0632029	0.723781	5.73037	5.94673	5.56263	6.11447	5.40474	6.056	5.72052	6.17293	1.1618	0.68215	1.24469	1.08442
12795781	NM_001191238	NCKIPSD	chr22	0.102616	0.0633449	0.561017	5.57444	5.41453	5.40234	5.58663	5.45489	5.694	5.3498	5.47925	0.895075	0.880087	0.929752	0.861692
12860849	NM_001035389	ING4	chr5	0.551007	0.0634446	0.079802	7.51714	7.64777	7.3686	7.7963	7.50387	7.5304	7.23333	8.06221	1.09477	0.743444	0.829004	1.44574
12890336	NM_001098036	SLC39A14	chr8	0.797305	0.0637462	0.295401	5.90136	5.95248	5.73199	6.12185	5.60056	6.20216	5.86341	6.04154	1.03607	0.763203	1.19985	0.894642
12854908	NM_001205991	PTPN12	chr4	0.781984	0.0639149	0.31297	8.78197	8.81274	8.68855	8.90617	8.73012	8.83382	8.64698	8.97851	1.02156	0.859984	0.944001	1.10549
12902917	NM_001105325	UBE2A	chrX	0.884603	0.0639405	0.651247	6.74169	6.78265	7.03858	6.48577	6.95412	6.52926	7.12304	6.44227	1.0288	1.46694	1.12422	0.941483
12743805	NM_001081605	MTMR3	chr17	0.728354	0.063952	0.158782	5.31088	5.36709	5.18075	5.49722	5.27018	5.35158	5.09132	5.64285	1.03973	0.803035	0.883407	1.22372
12719289	NM_001035291	COMMD7	chr13	0.663895	0.0640113	0.0142138	6.32198	6.40491	6.5498	6.1771	6.25069	6.39327	6.8489	5.96093	1.05917	1.29477	1.51383	0.741059
12818395	NM_001035500	MRPS34	chr25	0.0726909	0.0640138	0.0157583	7.02442	7.3089	7.31395	7.01937	7.37163	6.67722	7.25627	7.36153	1.21797	1.22653	0.923153	1.60693
12819589	NM_001034446	SFXN2	chr26	0.572476	0.0640667	0.504245	4.98007	4.76567	4.50282	5.24291	4.73713	5.22301	4.26852	5.26282	0.861905	0.598702	0.722664	1.02798
12813171	NM_001205922	UBN1	chr25	0.6575	0.0641089	0.225773	6.20383	6.27102	6.08954	6.38531	5.96226	6.44541	6.21682	6.32522	1.04767	0.814636	1.19297	0.920069
12870714	NM_001075406	CEP135	chr6	0.702912	0.0642127	0.722684	7.33329	7.28184	7.17588	7.43925	7.17767	7.4889	7.17408	7.3896	0.964969	0.833139	0.997513	0.933487
12907402	NM_001034214	UBL4A	chrX	0.775929	0.0643261	0.80875	7.73637	7.68589	7.88437	7.53789	7.93107	7.54168	7.83768	7.53411	0.965615	1.27146	0.937317	0.994767
12909850	XM_002699621	SLITRK2	chrX	0.239619	0.0643303	0.29005	5.27688	4.95698	5.37713	4.85673	5.68038	4.87338	5.07388	4.84007	0.801121	1.43436	0.656786	0.977175
12700950	ENSBTAT00000000051	SURF2	chr11	0.483524	0.0643728	0.300145	5.70942	5.81261	5.61814	5.9039	5.64356	5.77529	5.59271	6.0325	1.07414	0.820308	0.965368	1.19517
12727723	NM_001014913	HBE2	chr15	0.811951	0.064439	0.882768	5.04607	5.08174	4.91748	5.21034	4.8886	5.20355	4.94636	5.21712	1.02503	0.816282	1.04085	1.00945
12721043	NM_001101269	NRSN2	chr13	0.961616	0.0645219	0.971487	5.01273	5.00679	4.88923	5.13029	4.89441	5.13105	4.88406	5.12953	0.995894	0.846126	0.992856	0.998942
12905017	NM_001192822	MID1	chrX	0.173583	0.0645535	0.780485	5.97822	6.33753	6.40827	5.90747	6.26437	5.69207	6.55217	6.12288	1.28281	1.41499	1.22079	1.34799
12685559	NM_001205989	ARHGEF26	chr1	0.223504	0.06478	0.517345	5.97949	6.28236	5.89378	6.36807	5.66317	6.29581	6.12438	6.44034	1.23359	0.719817	1.37669	1.10537
12789956	NM_001104976	FANCM	chr21	0.80774	0.0648209	0.755859	6.14791	6.22975	5.86086	6.51679	5.87226	6.42356	5.84947	6.61003	1.05837	0.634666	0.984326	1.13798
12814943	XM_002698088	MAZ	chr25	0.197887	0.064833	0.287916	6.23797	6.56598	6.15991	6.64403	6.13011	6.34582	6.18971	6.94224	1.25528	0.714933	1.04218	1.51195
12837426	NM_001105346	ZRANB2	chr3	0.330657	0.0648835	0.22733	9.3415	9.39469	9.31554	9.42065	9.25566	9.42733	9.37542	9.41396	1.03756	0.929736	1.08656	0.990774
12883748	NM_001205551	POLRMT	chr7	0.0611913	0.0649688	0.436869	8.49181	8.63162	8.49291	8.63052	8.39532	8.58829	8.59051	8.67274	1.10177	0.909029	1.14488	1.06028
12783261	NM_001076067	PSMD14	chr2	0.390843	0.0650863	0.435785	9.7307	9.67899	9.64678	9.76291	9.6492	9.8122	9.64436	9.71362	0.964791	0.922659	0.996648	0.933952
12764212	NM_001046316	LGALS3BP	chr19	0.423221	0.0651301	0.0116947	5.74294	5.62021	5.82944	5.53371	6.10325	5.38263	5.55562	5.68479	0.918445	1.2275	0.684145	1.23299
12770409	ENSBTAT00000015973	GIT1	chr19	0.563724	0.0653381	0.64269	5.77063	5.66221	5.89836	5.53449	5.90909	5.63218	5.88763	5.4368	0.927604	1.28687	0.985237	0.873342
12755879	NM_174701	HSD17B14	chr18	0.354705	0.0654367	0.723995	5.08478	4.98466	5.1386	4.93084	5.20753	4.96202	5.06966	4.89966	0.932955	1.15489	0.908858	0.957691
12692130	ENSBTAT00000017326	CCNDBP1	chr10	0.674829	0.0655461	0.418034	8.64234	8.55729	8.79653	8.4031	8.75633	8.52834	8.83672	8.27786	0.942756	1.31351	1.05731	0.840616
12824009	NM_001075692	MTUS1	chr27	0.619088	0.0655544	0.13996	6.76694	6.90684	6.56413	7.10965	6.27989	7.25399	6.84837	6.96532	1.10183	0.685143	1.48296	0.818653
12812144	ENSBTAT00000026552	WBSCR27	chr25	0.758505	0.0655792	0.428377	7.10454	7.02656	6.81914	7.31196	6.95943	7.24965	6.67886	7.37427	0.947386	0.710636	0.823265	1.09022
12824988	NM_001038056	TM2D2	chr27	0.0652235	0.0656011	0.557102	5.51879	5.96165	5.9613	5.51914	5.80695	5.23063	6.11565	5.80764	1.35929	1.35864	1.23859	1.49176
12820083	XM_603021	ZNF518A	chr26	0.905202	0.0656136	0.603048	6.72727	6.75412	6.96003	6.52136	6.88773	6.56681	7.03233	6.47591	1.01879	1.35535	1.10543	0.938941
12857640	NM_001001147	CCNT1	chr5	0.154953	0.0659066	0.527692	8.3	8.55476	8.59582	8.25893	8.52353	8.07646	8.66811	8.4414	1.19314	1.26303	1.10541	1.28783
12836876	---	---	chr3	0.94834	0.0659719	0.00354725	5.56964	5.57314	5.62382	5.51896	5.71281	5.42648	5.53484	5.61144	1.00243	1.0754	0.883949	1.13679
12687982	NM_174070	GLCE	chr10	0.771948	0.0660509	0.61337	6.25876	6.18285	6.47481	5.96679	6.57912	5.93839	6.3705	5.99519	0.948743	1.4221	0.865369	1.04015
12890898	NM_001128501	FBXW12	chr8	0.748445	0.066067	0.524432	7.62881	7.57254	7.77079	7.43056	7.85504	7.40258	7.68653	7.45854	0.961746	1.26596	0.889761	1.03955
12867258	NM_001076028	DERA	chr5	0.842557	0.06615	0.768457	8.24474	8.21316	8.07466	8.38324	8.06703	8.42246	8.0823	8.34402	0.978342	0.807439	1.01064	0.947078
12770284	NM_001015600	KRT19	chr19	0.916532	0.0661863	0.0708174	5.42675	5.45325	5.19457	5.68543	4.9404	5.91309	5.44873	5.45777	1.01854	0.711598	1.4224	0.72935
12742757	NM_001205823	MFSD8	chr17	0.306786	0.0664223	0.918655	7.26632	7.09191	7.34183	7.01639	7.42047	7.11217	7.2632	6.92062	0.886127	1.25304	0.896718	0.875661
12731802	NM_001193113	NCAPD3	chr15	0.617233	0.0664797	0.431539	5.77449	5.82801	5.69786	5.90464	5.62874	5.92024	5.76698	5.88903	1.03779	0.866469	1.10056	0.978599
12698738	NM_178574	CAPG	chr11	0.154199	0.066486	0.965347	8.31726	8.47344	8.49817	8.29254	8.42239	8.21214	8.57396	8.37293	1.11433	1.15319	1.11078	1.1179
12721838	ENSBTAT00000002068	EIF2C2	chr14	0.438055	0.0670195	0.905383	7.92034	8.02141	7.84602	8.09573	7.78781	8.05287	7.90423	8.13859	1.07257	0.841065	1.08404	1.06122
12894902	NM_001015667	FBXO8	chr8	0.01629	0.0675228	0.0804415	7.13469	6.54619	7.05541	6.62547	7.55425	6.71513	6.55658	6.5358	0.665032	1.34718	0.500806	0.883113
12812241	NM_001046081	TMEM248	chr25	0.592469	0.0676592	0.659871	6.47691	6.5525	6.65033	6.37908	6.64357	6.31025	6.6571	6.4479	1.05379	1.20686	1.00942	1.10011
12829673	NM_001206269	FZD4	chr29	0.741055	0.0677737	0.301594	5.91207	5.98168	5.74409	6.14966	5.59879	6.22536	5.8894	6.07397	1.04943	0.754938	1.22316	0.900384
12899855	NM_001077869	OOEP	chr9	0.15709	0.0678184	0.0322704	5.5319	5.90895	5.96916	5.4717	6.07839	4.98541	5.85993	5.95798	1.29868	1.41173	0.859482	1.96232
12683407	NM_177517	ST6GAL1	chr1	0.429005	0.0679268	0.86501	5.0355	5.25524	5.41046	4.88029	5.32398	4.74702	5.49694	5.01355	1.16453	1.4441	1.12737	1.20291
12705950	NM_001206628	ADRA2B	chr11	0.359299	0.0679632	0.340751	5.08649	5.00108	5.13235	4.95522	5.13063	5.04235	5.13407	4.86809	0.942521	1.13063	1.00239	0.886224
12811194	XM_002697989	C25H16orf52	chr25	0.255135	0.0682395	0.708965	5.94473	6.18344	6.26181	5.86636	6.10404	5.78543	6.41959	5.94729	1.17993	1.31535	1.24448	1.11873
12879322	NM_001075761	HAND1	chr7	0.414534	0.0684619	0.655942	5.05183	4.9446	4.87317	5.12325	4.89773	5.20592	4.84861	5.04058	0.928367	0.840852	0.966525	0.891714
12800098	NM_001205819	ZNF445	chr22	0.485291	0.0688184	0.904162	5.501	5.60505	5.41095	5.6951	5.36783	5.63417	5.45407	5.75604	1.07479	0.821224	1.0616	1.08815
12713650	NM_001166510	PLCB4	chr13	0.551207	0.0690198	0.248699	5.16382	5.01943	4.86046	5.32279	5.07463	5.25302	4.6463	5.39256	0.904758	0.725815	0.743122	1.10155
12806544	NM_001103293	MED20	chr23	0.0460528	0.0693513	0.143134	6.43189	7.03717	6.46212	7.00694	5.94399	6.91979	6.98025	7.0941	1.52128	0.685475	2.0509	1.12843
12829265	XM_591785	KDM2A	chr29	0.635882	0.0694298	0.210306	8.95969	8.99589	8.90481	9.05078	8.83776	9.08163	8.97186	9.01993	1.02541	0.90377	1.09741	0.958138
12724305	NM_001206676	TTPA	chr14	0.673775	0.0695265	0.873287	4.98663	4.87111	4.66684	5.1909	4.70277	5.2705	4.6309	5.11131	0.923047	0.695408	0.951408	0.895532
12890045	NM_001098933	CDK20	chr8	0.957947	0.069561	0.574432	5.48067	5.49707	5.19109	5.78665	5.27066	5.69069	5.11153	5.88262	1.01143	0.661788	0.895564	1.14229
12715916	ENSBTAT00000013366	CBFA2T2	chr13	0.162989	0.0695857	0.562645	9.36149	9.565	9.59857	9.32792	9.53795	9.18503	9.65919	9.47081	1.1515	1.20635	1.08767	1.21907
12720426	NM_001206031	ADNP	chr13	0.511078	0.069593	0.570163	7.29205	7.47296	7.12079	7.64423	6.95232	7.63179	7.28926	7.65666	1.1336	0.695713	1.26308	1.01739
12703236	ENSBTAT00000063200 // ENSBTAT00000063200	LOC785455 // TMSB4X	chr11	0.195306	0.0695994	0.657119	7.66856	8.04771	8.13091	7.58536	8.00477	7.33235	8.25704	7.83838	1.30058	1.45957	1.19108	1.42014
12834900	NM_001076393	EIF1AD	chr29	0.759627	0.0700611	0.863359	7.63675	7.56882	7.39097	7.81461	7.40585	7.86766	7.37609	7.76156	0.954007	0.74554	0.979584	0.929099
12863669	ENSBTAT00000022449	LOC100335214	chr5	0.530404	0.0701739	0.516021	7.0687	7.17132	7.27524	6.96478	7.27708	6.86033	7.27341	7.06922	1.07372	1.24011	0.997464	1.1558
12752815	NM_001206193	PHLPP2	chr18	0.98632	0.0702381	0.435254	7.73897	7.74152	7.59806	7.88242	7.53813	7.9398	7.658	7.82504	1.00177	0.821106	1.08664	0.923533
12800094	NM_001114510	BRK1	chr22	0.978545	0.0702606	0.0928629	7.73643	7.72887	8.0012	7.4641	8.25243	7.22044	7.74998	7.70776	0.994771	1.45106	0.705907	1.40184
12790238	NM_001191454	FANCI	chr21	0.355524	0.0702949	0.296806	7.62161	7.75121	7.55433	7.81849	7.41609	7.82714	7.69258	7.80984	1.09398	0.832688	1.21124	0.988079
12706360	NM_001102509	SURF4	chr11	0.316626	0.0704507	0.367015	6.97409	7.14557	7.22058	6.89907	7.21184	6.73633	7.22933	7.06181	1.12621	1.24964	1.01219	1.25308
12816626	NM_001083682	CD2BP2	chr25	0.469978	0.0704548	0.630128	8.08435	7.97017	7.87775	8.17678	7.97271	8.196	7.78278	8.15756	0.923906	0.812799	0.876649	0.97371
12679876	NM_001046091	PDIA5	chr1	0.283363	0.070497	0.244324	6.0597	5.83229	6.14449	5.74751	6.382	5.73741	5.90697	5.75761	0.854168	1.31674	0.719455	1.01411
12849578	NM_001034256	COA1	chr4	0.355829	0.0706318	0.329265	7.03102	7.24415	6.92052	7.35465	6.92673	7.13531	6.91431	7.574	1.1592	0.740138	0.991426	1.35537
12904168	NM_001034500	EBP	chrX	0.0685573	0.0706742	0.0388608	8.25152	8.65052	8.64885	8.25319	8.67923	7.82381	8.61848	8.68257	1.3186	1.31555	0.958767	1.81348
12687000	XM_868792	LOC616698	chr1	0.171969	0.0708711	0.814412	5.04823	4.9065	4.88147	5.07326	4.94051	5.15595	4.82244	4.99057	0.906433	0.875523	0.921417	0.891694
12807700	NM_001103089	SEH1L	chr24	0.820665	0.0708917	0.152512	8.65798	8.68678	8.79327	8.55148	8.87274	8.44322	8.71381	8.65975	1.02016	1.18246	0.895688	1.16193
12720446	NM_001046375	PRPF6	chr13	0.975025	0.0709564	0.184201	6.55667	6.56143	6.41412	6.70398	6.30775	6.80559	6.52049	6.60238	1.00331	0.817978	1.15889	0.868615
12757267	ENSBTAT00000025929	ADCK4	chr18	0.535041	0.0709725	0.541812	5.24524	5.15781	5.33488	5.06817	5.42157	5.0689	5.24819	5.06744	0.941203	1.20306	0.886762	0.998987
12809854	NM_001035342	ACAA2	chr24	0.999279	0.071024	0.801476	6.03326	6.03347	5.80778	6.25895	5.83749	6.22902	5.77806	6.28888	1.00015	0.731448	0.959642	1.04236
12891786	ENSBTAT00000036540 // ENSBTAT00000036540	R3HCC1 // R3HCC1	chr8	0.263221	0.0713394	0.41317	5.6958	5.4434	5.7798	5.3594	5.99744	5.39416	5.56216	5.32464	0.839499	1.33829	0.739551	0.952955
12749032	NR_031389	MIR2328	chr18	0.247025	0.0715284	0.973471	5.03398	4.88757	5.07837	4.84319	5.15363	4.91434	5.0031	4.77204	0.903495	1.17705	0.900921	0.906076
12692561	NM_001102341	LGALS3	chr10	0.614252	0.0715697	0.166314	9.54151	9.58889	9.65412	9.47627	9.69727	9.38575	9.61098	9.56679	1.03338	1.1312	0.941943	1.1337
12788100	NM_001046452	DUSP1	chr20	0.971487	0.0715734	0.849366	7.4824	7.47759	7.6077	7.35228	7.62288	7.34191	7.59253	7.36266	0.996674	1.19368	0.979179	1.01448
12767359	NM_174396	MYO1C	chr19	0.490674	0.0717445	0.660741	7.53965	7.61983	7.68933	7.47016	7.62383	7.45548	7.75483	7.48484	1.05715	1.16406	1.09505	1.02055
12841500	ENSBTAT00000029261	ZMYM6NB	chr3	0.0967049	0.0717714	0.426706	6.40985	6.77508	6.39292	6.79201	6.29471	6.52499	6.49113	7.05904	1.28809	0.758336	1.14586	1.44799
12689185	NM_001075636	RBM23	chr10	0.921851	0.0718269	0.910405	7.02626	7.00684	6.82877	7.20434	6.82734	7.22518	6.83019	7.18349	0.986632	0.770799	1.00198	0.971517
12848618	NR_030989	MIR671	chr4	0.683083	0.0718734	0.624742	6.4136	6.31847	6.58654	6.14553	6.69116	6.13604	6.48191	6.15503	0.936184	1.35755	0.864986	1.01324
12904815	ENSBTAT00000028542	C1GALT1C1	chrX	0.359271	0.0718804	0.849636	5.01165	5.20513	5.30592	4.91085	5.18944	4.83387	5.42241	4.98784	1.14351	1.31501	1.17525	1.11263
12735989	XM_002694238	CAMSAP2	chr16	0.376371	0.0719803	0.234552	6.70309	6.54575	6.79099	6.45785	6.97646	6.42972	6.60552	6.48598	0.896677	1.25975	0.773278	1.03977
12737365	NM_001102298	LRRC47	chr16	0.386396	0.0722687	0.16686	7.26054	7.36392	7.20051	7.42395	7.23289	7.28818	7.16813	7.55971	1.07429	0.856524	0.956106	1.20709
12858861	ENSBTAT00000056411	ZBTB39	chr5	0.672239	0.0723497	0.786272	5.7605	5.85395	6.01581	5.59864	5.93919	5.58181	6.09244	5.61547	1.06692	1.33531	1.11207	1.02361
12844337	NM_001109998	HIPK1	chr3	0.445897	0.0724454	0.915828	9.08392	9.18082	9.25158	9.01315	9.20979	8.95805	9.29337	9.06826	1.06947	1.17971	1.05965	1.07938
12707461	NM_001033628	RAB1A	chr11	0.130674	0.0726059	0.453522	10.9063	10.9768	10.899	10.9841	10.8807	10.9318	10.9173	11.0364	1.05011	0.942718	1.02564	1.07517
12764980	NM_001113302	SREBF1	chr19	0.230539	0.0726111	0.351006	5.08531	4.97603	4.94642	5.11492	4.95895	5.21167	4.9339	5.01817	0.927052	0.889771	0.982784	0.874481
12803704	NM_001206906	RAB23	chr23	0.0836648	0.0726923	0.536695	6.78206	7.10179	6.77543	7.10842	6.67028	6.89384	6.88057	7.323	1.2481	0.793886	1.15693	1.34645
12715450	BC114685	DIDO1	chr13	0.940917	0.0727215	0.349258	5.85494	5.8445	5.71659	5.98285	5.65499	6.05489	5.7782	5.91081	0.992793	0.831474	1.08916	0.904956
12866032	NM_001205372	RBFOX2	chr5	0.670268	0.0727249	0.0147327	6.23294	6.28155	6.36488	6.14961	6.49372	5.97217	6.23604	6.32705	1.03426	1.16092	0.836434	1.27888
12778245	NM_001102199	MYO1B	chr2	0.411929	0.0727684	0.207127	9.21251	9.29264	9.16124	9.34391	9.05866	9.36637	9.26382	9.32145	1.05711	0.881071	1.15282	0.969348
12732676	ENSBTAT00000020079	GDPD5	chr15	0.193127	0.0733746	0.148206	6.24515	6.46413	6.50907	6.20021	6.27715	6.21316	6.741	6.18726	1.16391	1.23873	1.37922	0.982207
12863379	---	---	chr5	0.561536	0.073501	0.402228	5.89205	5.7424	6.05893	5.57551	6.24235	5.54175	5.87552	5.60928	0.901472	1.39805	0.775484	1.04793
12748137	ENSBTAT00000064262	BCL7A	chr17	0.868087	0.0740313	0.300406	5.29441	5.33189	5.1009	5.52539	5.201	5.38782	5.0008	5.66297	1.02632	0.7451	0.870435	1.21012
12698542	NM_174430	PPM1B	chr11	0.286537	0.0740901	0.956763	10.3577	10.2844	10.2575	10.3845	10.2923	10.423	10.2227	10.3461	0.950466	0.91571	0.952881	0.948057
12807159	XR_084052	LOC787649	chr23	0.805062	0.0742455	0.34495	6.72996	6.81736	6.44104	7.10629	6.56682	6.89309	6.31525	7.31948	1.06246	0.630579	0.839979	1.34386
12879945	NM_001099708	RNF130	chr7	0.579587	0.0742471	0.118611	6.9094	7.02959	7.17246	6.76653	7.28762	6.53118	7.0573	7.00189	1.08688	1.32494	0.852444	1.38579
12803419	NM_001099717	DEK	chr23	0.565605	0.074292	0.0714807	9.35631	9.32613	9.29211	9.39033	9.25755	9.45506	9.32667	9.32559	0.979301	0.934186	1.04907	0.914169
12898565	NM_001205737	ZBTB24	chr9	0.502644	0.0743565	0.212336	6.31193	6.46041	6.17952	6.59282	5.96467	6.65919	6.39438	6.52644	1.1084	0.750908	1.34696	0.912086
12692627	XM_001790629	CASC5	chr10	0.892126	0.0743573	0.596445	6.90869	6.88885	6.76135	7.03619	6.81016	7.00722	6.71254	7.06516	0.986344	0.826545	0.934575	1.04098
12897048	NM_001046041	CD164	chr9	0.207574	0.0746093	0.576017	9.81394	9.90776	9.92897	9.79273	9.86167	9.76621	9.99627	9.81925	1.0672	1.09904	1.09779	1.03745
12865547	XM_589568	KIAA1467	chr5	0.651658	0.0749184	0.247934	8.32471	8.37983	8.46639	8.23815	8.36699	8.28242	8.56579	8.19387	1.03895	1.17141	1.14774	0.940468
12895060	XM_002689821	GAS1	chr8	0.44998	0.0750205	0.990048	5.07559	5.17516	5.00295	5.2478	4.95235	5.19883	5.05355	5.29677	1.07146	0.843908	1.07267	1.07025
12727130	NM_001081713	CLP1	chr15	0.429314	0.075036	0.294751	6.45625	6.26835	6.1417	6.5829	6.36115	6.55135	5.92226	6.61445	0.877887	0.736523	0.737702	1.04471
12905866	NM_001035488	NUDT10	chrX	0.929558	0.0753135	0.155406	5.62519	5.66358	6.05098	5.2378	5.71307	5.53732	6.38889	4.93828	1.02697	1.75708	1.5975	0.660194
12720799	ENSBTAT00000018301	ITPA	chr13	0.853269	0.0753277	0.222235	7.20731	7.2501	7.01223	7.44518	7.13538	7.27924	6.88907	7.61112	1.0301	0.740742	0.84305	1.25865
12778300	XM_002685281	TLK1	chr2	0.749971	0.0753939	0.116415	7.981	8.02052	8.11664	7.88488	7.99573	7.96627	8.23755	7.80349	1.02777	1.17426	1.18248	0.8933
12853121	NM_174324	GNAI1	chr4	0.0707051	0.0754125	0.0248134	5.92242	5.4317	5.43611	5.918	5.9953	5.84953	4.87692	5.98647	0.711671	0.716041	0.460611	1.09957
12699591	NM_001035082	SUCLG1	chr11	0.339821	0.0754361	0.347277	7.87178	8.04477	8.12542	7.79114	7.9538	7.78977	8.29704	7.7925	1.12739	1.26075	1.26861	1.00189
12826038	NM_001101862	SUPV3L1	chr28	0.650503	0.075538	0.368957	7.6205	7.52408	7.37384	7.77074	7.51859	7.72241	7.22909	7.81906	0.93535	0.75949	0.818189	1.06929
12771489	NM_001046320	SMTNL2	chr19	0.0156118	0.0755583	0.151148	5.04628	4.70831	4.99601	4.75857	5.25918	4.83338	4.73285	4.68377	0.791155	1.1789	0.694318	0.901497
12764569	NM_001102189	SGSH	chr19	0.373199	0.0756208	0.857542	5.41505	5.59218	5.31995	5.68728	5.24902	5.58108	5.39088	5.79348	1.13063	0.775213	1.10332	1.15861
12897169	NM_001101962	TUBE1	chr9	0.528561	0.0756474	0.251726	5.65643	5.4462	5.86128	5.24135	6.16041	5.15244	5.56214	5.33027	0.864403	1.53679	0.660543	1.13118
12831393	ENSBTAT00000044244	OSBPL5	chr29	0.454397	0.0758058	0.813744	5.19046	5.25895	5.30949	5.13991	5.28595	5.09497	5.33304	5.18485	1.04862	1.12474	1.03318	1.06428
12761699	NM_001034244	TADA2A	chr19	0.162783	0.0760052	0.679887	8.27421	8.059	8.02708	8.30612	8.16559	8.38282	7.88857	8.22942	0.86142	0.824138	0.825291	0.89913
12756602	NM_001034335	IST1	chr18	0.999539	0.0760199	0.204821	8.16733	8.16724	8.0198	8.31477	7.91708	8.41758	8.12252	8.21196	0.999937	0.815088	1.15303	0.867168
12885268	NM_001098955	GLT25D1	chr7	0.722624	0.0762451	0.841551	6.25963	6.1823	6.42383	6.01811	6.48424	6.03503	6.36342	6.00119	0.94781	1.32475	0.919664	0.976818
12800759	ENSBTAT00000040272	CPNE9	chr22	0.964725	0.0762565	0.181724	6.0864	6.09061	5.99976	6.17725	6.06303	6.10977	5.93649	6.24472	1.00292	0.88424	0.916026	1.09806
12840805	NM_001034703	ELOVL1	chr3	0.615157	0.076258	0.387186	7.37888	7.52778	7.72855	7.17812	7.78318	6.97459	7.67391	7.38165	1.10872	1.46452	0.927057	1.32598
12880995	NM_001038176	CXXC5	chr7	0.883273	0.0764049	0.194804	6.09853	6.11269	6.19553	6.01569	6.25268	5.94437	6.13838	6.087	1.00987	1.13276	0.923827	1.10392
12878534	ENSBTAT00000013182	LOC510442	chr7	0.131826	0.0764188	0.582549	7.6109	7.45891	7.62554	7.44427	7.72838	7.49341	7.52271	7.39512	0.900013	1.13389	0.867134	0.934139
12842122	BC151601	RUSC1	chr3	0.746427	0.0764664	0.704517	5.67839	5.72542	5.56655	5.83726	5.51545	5.84134	5.61766	5.83318	1.03313	0.828915	1.07342	0.994359
12885438	ENSBTAT00000017046	EBI3	chr7	0.680087	0.0768223	0.594645	5.11036	5.0711	5.17915	5.00232	5.22416	4.99657	5.13413	5.00807	0.973151	1.1304	0.939505	1.008
12711615	NM_001035069	COG6	chr12	0.869779	0.0768532	0.366819	5.92856	5.96761	6.16971	5.72646	6.04135	5.81578	6.29808	5.63714	1.02743	1.35967	1.19477	0.883535
12808197	NM_001046365	PSMG2	chr24	0.389396	0.0773088	0.746112	9.38041	9.5252	9.60729	9.29832	9.56185	9.19896	9.65273	9.39767	1.10557	1.23883	1.06502	1.14767
12909959	NM_001192851	IDS	chrX	0.293598	0.0774096	0.343779	5.01823	4.81446	5.0934	4.73929	5.10375	4.9327	5.08305	4.54587	0.868282	1.2782	0.985753	0.76481
12818431	ENSBTAT00000009708	CYTH3	chr25	0.306252	0.0776146	0.442871	5.34945	5.19825	5.13896	5.40874	5.15828	5.54062	5.11964	5.27685	0.900501	0.829447	0.973576	0.832911
12686334	NM_001191360	SENP2	chr1	0.234791	0.0778726	0.112506	9.23121	9.31921	9.20806	9.34235	9.10421	9.3582	9.31192	9.3265	1.0629	0.911119	1.15485	0.978269
12795374	NM_001014905	SLC25A38	chr22	0.703058	0.077973	0.121203	6.83092	6.88928	7.00168	6.71852	6.84946	6.81239	7.15389	6.62466	1.04128	1.21685	1.23494	0.877984
12716955	NM_001076348	PCED1A	chr13	0.680484	0.0780359	0.873587	5.76366	5.86375	6.03835	5.58907	6.00759	5.51974	6.0691	5.6584	1.07183	1.36536	1.04355	1.10088
12741630	ENSBTAT00000065888	DGCR6	chr17	0.715119	0.0782888	0.531652	8.32794	8.38149	8.49027	8.21916	8.50957	8.14631	8.47097	8.292	1.03781	1.20673	0.973601	1.10626
12903405	XM_002700066	PHF16	chrX	0.620346	0.0784665	0.950957	6.23626	6.39818	6.61851	6.01594	6.52753	5.94499	6.70948	6.08688	1.11878	1.51842	1.13441	1.10335
12907665	NM_001077875	KCNE1L	chrX	0.103372	0.0788812	0.941411	5.23452	5.07112	5.2416	5.06404	5.31977	5.14927	5.16343	4.9788	0.892916	1.13097	0.897298	0.888555
12787010	ENSBTAT00000024287	SLC1A3	chr20	0.472779	0.0789942	0.405484	7.43762	7.55563	7.64717	7.34608	7.65672	7.21851	7.63761	7.47364	1.08524	1.23208	0.98684	1.19344
12767992	ENSBTAT00000028490	BLMH	chr19	0.792085	0.0790786	0.962133	7.55088	7.49639	7.33301	7.71426	7.35535	7.74641	7.31067	7.68212	0.962937	0.767771	0.969502	0.956416
12686594	ENSBTAT00000000628	ZNF148	chr1	0.568066	0.0791512	0.671946	7.41912	7.50131	7.32803	7.5924	7.25653	7.58172	7.39953	7.60308	1.05862	0.832562	1.10421	1.01492
12758260	ENSBTAT00000027224	PAF1	chr18	0.861763	0.0792542	0.335293	8.81309	8.83826	8.95899	8.69236	9.01706	8.60912	8.90092	8.7756	1.0176	1.20299	0.922652	1.12232
12894805	ENSBTAT00000004032	DENND4C	chr8	0.929117	0.079319	0.0379316	8.37833	8.38693	8.29345	8.47181	8.18148	8.57517	8.40542	8.36844	1.00598	0.883711	1.16792	0.866494
12720857	ENSBTAT00000027713	RPS21	chr13	0.291003	0.079333	0.0263059	12.0885	12.1255	12.1387	12.0752	12.1617	12.0153	12.1158	12.1352	1.02597	1.04498	0.968673	1.08666
12849449	NM_001193233	CUL1	chr4	0.128797	0.0793334	0.0819758	7.98719	8.17156	7.97152	8.18723	7.77251	8.20187	8.17053	8.17259	1.13632	0.861123	1.3177	0.979911
12692772	NM_001105025	LRR1	chr10	0.0240137	0.0795393	0.296638	6.8943	7.48728	6.9681	7.41349	6.79992	6.98868	7.13628	7.83829	1.50836	0.734388	1.26256	1.80201
12908271	NM_001080728	MAGEH1	chrX	0.463407	0.0797057	0.444031	5.10288	5.3048	5.45531	4.95237	5.45982	4.74595	5.4508	5.15879	1.15022	1.4171	0.993768	1.33131
12898602	NM_001076210	COQ3	chr9	0.125248	0.0797758	0.874339	7.47652	7.7596	7.45438	7.78174	7.29878	7.65425	7.60998	7.90922	1.21679	0.796995	1.24074	1.19331
12784351	NM_001193110	CDA	chr2	0.820173	0.0798744	0.0859889	5.26655	5.35889	5.68632	4.93912	6.00568	4.52743	5.36696	5.35081	1.06609	1.67853	0.642283	1.76955
12825628	NM_001130761	DEFB5	chr27	0.0846472	0.0799663	0.269215	5.06744	4.60037	5.0714	4.59641	5.45034	4.68454	4.69246	4.50828	0.723429	1.38991	0.591363	0.884989
12908237	XM_872450	PHF8	chrX	0.266023	0.0802549	0.480391	7.34449	7.59122	7.66774	7.26797	7.46705	7.22194	7.86844	7.31399	1.18651	1.3193	1.32078	1.06588
12866444	NM_001077943	ESYT1	chr5	0.556857	0.0802882	0.522874	5.33607	5.45934	5.2059	5.5895	5.21136	5.46077	5.20044	5.71824	1.0892	0.766523	0.992458	1.19538
12727841	ENSBTAT00000018792	CEP164	chr15	0.885847	0.0803876	0.693018	5.22691	5.24019	5.1486	5.3185	5.12367	5.33015	5.17353	5.30684	1.00925	0.888905	1.03517	0.983972
12737158	NM_001099110	ANGEL2	chr16	0.132993	0.0807151	0.520954	7.66735	8.0071	8.0373	7.63715	7.797	7.53771	8.2776	7.73659	1.26553	1.31965	1.39533	1.14781
12867757	NM_001083490	HOXC13	chr5	0.773765	0.081172	0.34778	5.21698	5.26803	5.08001	5.405	5.13894	5.29503	5.02109	5.51498	1.03602	0.798303	0.921561	1.16469
12705349	NM_001046086	WDR54	chr11	0.730057	0.08129	0.00843876	5.73481	5.80161	5.94518	5.59125	5.62621	5.84341	6.26414	5.33908	1.04739	1.27804	1.5561	0.704987
12829954	NM_001075287	CTTN	chr29	0.880181	0.0813287	0.173364	6.90504	6.87682	6.71956	7.06229	6.6024	7.20767	6.83672	6.91691	0.98063	0.78855	1.17635	0.817473
12741140	NM_001040585	COX20	chr16	0.541132	0.0815218	0.828007	7.50632	7.66635	7.34813	7.82453	7.29641	7.71622	7.39985	7.93284	1.11731	0.718768	1.07433	1.16201
12776686	NM_001102031	FASTKD1	chr2	0.820739	0.0815356	0.90665	6.66583	6.61332	6.85143	6.42772	6.89126	6.44039	6.8116	6.41505	0.964261	1.34137	0.94628	0.982583
12738576	NM_174445	PTGS2	chr16	0.822819	0.0816215	0.336061	7.74626	7.80831	8.03058	7.52399	7.86437	7.62815	8.19679	7.41984	1.04395	1.42068	1.25912	0.865548
12710478	ENSBTAT00000009870	N4BP2L2	chr12	0.919768	0.081953	0.429093	6.72774	6.73963	6.62585	6.84151	6.57278	6.8827	6.67893	6.80032	1.00828	0.861154	1.07635	0.944501
12733161	NM_001192324	KLHL35	chr15	0.698145	0.0819962	0.200325	6.30113	6.24342	6.40789	6.13667	6.53435	6.06792	6.28143	6.20542	0.960788	1.20682	0.839196	1.1
12892212	ENSBTAT00000016265	LOC786417	chr8	0.430225	0.0820556	0.875279	6.48932	6.59033	6.65561	6.42404	6.59516	6.38349	6.71607	6.46459	1.07252	1.17411	1.08742	1.05782
12794342	ENSBTAT00000021049	MAP4	chr22	0.239905	0.0821737	0.730579	9.73889	9.82853	9.85181	9.71561	9.81986	9.65792	9.88377	9.7733	1.06411	1.09901	1.04529	1.08326
12837328	NM_001206227	RSBN1	chr3	0.33008	0.0823127	0.127297	6.8885	7.07491	6.80971	7.1537	6.86574	6.91126	6.75368	7.39614	1.13793	0.787861	0.925265	1.39946
12853987	NM_001080267	KIAA1549	chr4	0.0479339	0.0823578	0.195686	6.89434	7.2767	7.25095	6.92009	6.93923	6.84944	7.56266	6.99074	1.30347	1.25776	1.54053	1.1029
12877665	ENSBTAT00000023551	SLC39A3	chr7	0.538867	0.0832632	0.580116	6.28888	6.40566	6.51905	6.17549	6.51316	6.06459	6.52493	6.28639	1.08432	1.26888	1.00819	1.16619
12790500	ENSBTAT00000003143	C21H15orf42	chr21	0.523195	0.0834027	0.197855	7.21854	7.13174	7.2979	7.05238	7.25198	7.1851	7.34383	6.91966	0.941613	1.18552	1.06574	0.831947
12900935	NM_001076018	MTHFD1L	chr9	0.764255	0.08361	0.220874	10.6336	10.6117	10.6891	10.5562	10.6542	10.6131	10.724	10.4993	0.984881	1.09653	1.04958	0.924172
12681363	NM_001192759	BBX	chr1	0.366871	0.0838056	0.284462	7.30575	7.42508	7.24695	7.48388	7.11614	7.49536	7.37777	7.47239	1.08623	0.848553	1.19883	0.984199
12748358	NM_001245953	PRAME	chr17	0.580414	0.0838742	0.431566	5.49243	5.57305	5.40104	5.66444	5.41837	5.56648	5.3837	5.7624	1.05748	0.833121	0.976255	1.14545
12777819	ENSBTAT00000053554	CIR1	chr2	0.566682	0.0838959	0.0454916	8.51769	8.58338	8.654	8.44707	8.49941	8.53598	8.8086	8.35815	1.04658	1.15424	1.23902	0.88403
12729965	NM_001046563	MRPL48	chr15	0.397833	0.0839539	0.571271	8.91321	8.99326	8.86834	9.03814	8.85494	8.97148	8.88173	9.10479	1.05705	0.888967	1.01874	1.0968
12845414	NM_001205907	GJB5	chr3	0.844974	0.0840309	0.162042	9.31242	9.29783	9.23749	9.37276	9.2986	9.32624	9.17637	9.41928	0.989937	0.910497	0.918768	1.06662
12799116	ENSBTAT00000044043	TSEN2	chr22	0.907736	0.084099	0.318309	5.44892	5.42373	5.23924	5.63341	5.36205	5.5358	5.11642	5.73103	0.982686	0.760925	0.843449	1.14491
12798953	BC119912	C22H3orf19	chr22	0.833262	0.0841198	0.427829	7.17795	7.13817	6.98687	7.32924	7.08238	7.27352	6.89137	7.38497	0.972805	0.788744	0.87599	1.08032
12764915	NM_001206122	GGNBP2	chr19	0.445419	0.0841791	0.446077	8.70933	8.60746	8.53851	8.77827	8.53859	8.88007	8.53844	8.67648	0.931824	0.846885	0.999896	0.868387
12770881	XM_003587388	MYO18A	chr19	0.360134	0.0843319	0.936005	5.20358	5.1278	5.09167	5.23971	5.13284	5.27432	5.05049	5.2051	0.948826	0.902475	0.944521	0.953151
12852436	NM_001130930	PL-5283	chr4	0.60915	0.0843623	0.349315	7.96866	8.14311	7.74811	8.36366	7.82214	8.11518	7.67408	8.61214	1.12853	0.652681	0.902461	1.41124
12905870	XM_882574	LOC617166	chrX	0.504529	0.084408	0.959179	6.63122	6.40016	6.82702	6.20436	6.95134	6.31109	6.70269	6.09762	0.85201	1.53971	0.841682	0.862465
12750696	NM_001077894	LOC509810	chr18	0.437917	0.0844715	0.551035	9.40827	9.47032	9.36756	9.51103	9.31278	9.50376	9.42234	9.51831	1.04395	0.905335	1.0789	1.01014
12767425	NM_174491	YWHAE	chr19	0.448596	0.0846688	0.366566	11.5121	11.4877	11.471	11.5288	11.4687	11.5555	11.4734	11.502	0.983236	0.960783	1.00332	0.96355
12725971	NM_001079618	MED30	chr14	0.751961	0.0846723	0.51185	6.46405	6.39263	6.63249	6.22419	6.74271	6.18539	6.52227	6.26299	0.9517	1.32712	0.858303	1.05526
12789017	NM_174037	DLK1	chr21	0.330553	0.0846923	0.401206	5.1497	5.05945	5.02192	5.18723	5.10583	5.19358	4.93802	5.18089	0.939359	0.891737	0.890191	0.991242
12728095	NM_001024550	ATP5L	chr15	0.90197	0.0849692	0.755576	13.0069	13.0043	12.9869	13.0243	12.985	13.0288	12.9889	13.0198	0.998235	0.974418	1.00271	0.993784
12765816	NM_001077075	TOB1	chr19	0.685375	0.0850142	0.524214	6.33149	6.42126	6.57609	6.17665	6.60204	6.06094	6.55014	6.29237	1.0642	1.31899	0.964671	1.17399
12715602	NM_001206395	C13H20orf7	chr13	0.139841	0.0850231	0.206001	8.52114	8.28881	8.2677	8.54225	8.48242	8.55985	8.05297	8.52465	0.851262	0.826709	0.742544	0.975896
12839187	NM_001035358	MKNK1	chr3	0.674884	0.0852036	0.133867	5.68223	5.57929	5.8518	5.40973	5.71303	5.65144	5.99056	5.16802	0.931131	1.35855	1.21212	0.715278
12876951	NM_174231	ADRB2	chr7	0.541719	0.085516	0.824722	5.88362	6.07663	5.69649	6.26377	5.63483	6.13242	5.75814	6.39511	1.14314	0.674888	1.08923	1.19971
12819767	NM_001075745	DPCD	chr26	0.653459	0.0856204	0.569153	8.45815	8.36364	8.22168	8.60011	8.2089	8.7074	8.23446	8.49283	0.936595	0.769273	1.01788	0.861803
12814278	NM_001081545	RAB40C	chr25	0.497833	0.0858782	0.0734354	5.40035	5.51225	5.60394	5.30866	5.70251	5.09819	5.50536	5.51914	1.08065	1.22712	0.872274	1.33881
12839149	NM_001192598	SYDE2	chr3	0.271205	0.085907	0.529585	5.51756	5.75626	5.44525	5.82858	5.39319	5.64194	5.4973	6.01522	1.17992	0.766666	1.07483	1.29529
12837750	ENSBTAT00000021129	CC2D1B	chr3	0.599118	0.0860606	0.779826	5.53087	5.62305	5.41976	5.73416	5.34923	5.7125	5.49028	5.75582	1.06598	0.804181	1.1027	1.03048
12707574	NM_001046476	VAMP5	chr11	0.532754	0.0860901	0.714819	5.79294	5.62036	5.95418	5.45912	6.0908	5.49507	5.81756	5.42317	0.887258	1.40938	0.827456	0.951381
12700576	ENSBTAT00000010591	GCFC2	chr11	0.967903	0.0861414	0.884146	5.14432	5.15365	5.35786	4.94011	5.33628	4.95236	5.37944	4.92787	1.00649	1.33584	1.03037	0.983171
12767851	NM_001013603	IFT20	chr19	0.34325	0.0863982	0.034397	9.12795	9.26682	9.32727	9.0675	9.42223	8.83368	9.23232	9.30132	1.10104	1.19729	0.876663	1.38285
12854454	XM_597790	RAPGEF5	chr4	0.0200096	0.0865262	0.551622	6.43065	7.03409	6.51906	6.94568	6.1463	6.71499	6.89182	7.17637	1.51934	0.744003	1.67657	1.37686
12777981	NM_001193123	PUM1	chr2	0.418634	0.0865938	0.692246	8.03913	8.12827	7.98568	8.18172	7.91947	8.15879	8.05189	8.20466	1.06374	0.872939	1.09613	1.0323
12792965	XM_002696793	CDCA4	chr21	0.638868	0.0866537	0.135366	5.42899	5.46766	5.37455	5.5221	5.29165	5.56633	5.45744	5.47787	1.02716	0.902779	1.12178	0.940531
12900227	NM_001082435	FBXO5	chr9	0.507898	0.0873261	0.215103	10.0008	10.0817	10.1501	9.9324	10.1868	9.81476	10.1134	10.05	1.05772	1.16289	0.950433	1.17713
12745660	NM_001075180	TMEM184C	chr17	0.0681019	0.0873418	0.0524964	8.39436	8.63851	8.63007	8.40281	8.63868	8.15005	8.62146	8.65557	1.18439	1.17061	0.988134	1.41963
12831867	ENSBTAT00000000071	FEN1	chr29	0.165008	0.0874778	0.505878	6.45334	6.61371	6.43321	6.63384	6.39053	6.51615	6.47589	6.75153	1.11757	0.870172	1.06095	1.17722
12897522	NM_001192571	PHF3	chr9	0.187236	0.0876638	0.582992	9.03048	8.87983	9.0546	8.8557	9.09929	8.96166	9.00992	8.74974	0.900844	1.14783	0.939927	0.863386
12863589	ENSBTAT00000004368	PNPLA3	chr5	0.71723	0.0877004	0.524463	6.29654	6.24846	6.1539	6.3911	6.13551	6.45757	6.1723	6.32463	0.967227	0.848393	1.02583	0.911975
12705262	NM_001130750	PPP6C	chr11	0.472216	0.0880238	0.787097	7.59981	7.7238	7.81478	7.50884	7.72966	7.46997	7.8999	7.5477	1.08974	1.23623	1.12524	1.05536
12858172	NM_001075267	CNPY2	chr5	0.72537	0.0881164	0.610249	9.10737	9.07282	9.00235	9.17785	8.9945	9.22024	9.01019	9.13545	0.976338	0.885461	1.01093	0.942925
12740655	NM_001192199	RAB3GAP2	chr16	0.596373	0.0881202	0.37637	6.73011	6.78142	6.66954	6.84198	6.68708	6.77313	6.65199	6.91084	1.0362	0.887335	0.975973	1.10015
12894334	NM_001034562	HNRNPK	chr8	0.00718158	0.0883554	0.864918	10.2458	10.4055	10.3727	10.2786	10.2973	10.1942	10.4481	10.3629	1.11708	1.06742	1.11015	1.12404
12820751	XM_003587902	INPP5F	chr26	0.127645	0.0883913	0.293495	6.58574	6.35471	6.60068	6.33977	6.79429	6.3772	6.40707	6.30234	0.852021	1.19823	0.764604	0.949433
12787429	NM_001103244	RAD17	chr20	0.125182	0.0886107	0.0408455	7.01587	7.1691	7.17834	7.00663	6.99638	7.03535	7.36029	6.97791	1.11206	1.12639	1.28691	0.96097
12785857	BC104545	FAM173B	chr20	0.793936	0.0886219	0.838368	5.89326	5.84652	5.71035	6.02943	5.75196	6.03456	5.66873	6.02431	0.968119	0.801578	0.943941	0.992916
12873593	NM_001075184	LARP7	chr6	0.847674	0.0888586	0.46833	9.73838	9.75615	9.66478	9.82975	9.62207	9.85468	9.70749	9.80481	1.0124	0.891951	1.061	0.966025
12719938	NM_001075861	SAMHD1	chr13	0.466326	0.0890433	0.384572	8.64049	8.7209	8.58315	8.77823	8.49478	8.78619	8.67152	8.77027	1.05732	0.873525	1.13033	0.989027
12810111	NM_001192685	DSG3	chr24	0.183988	0.0891598	0.852526	5.6008	5.91686	5.55287	5.96479	5.41634	5.78526	5.6894	6.14432	1.24493	0.751621	1.20837	1.28259
12854547	NM_001191316	PHTF2	chr4	0.980107	0.0891738	0.0853733	7.42858	7.42312	7.23056	7.62114	7.43118	7.42599	7.02995	7.81628	0.996218	0.762826	0.757216	1.31066
12745057	NM_001159818	TMED2	chr17	0.481708	0.0893289	0.443247	10.6666	10.7342	10.7852	10.6155	10.7883	10.5449	10.7821	10.6862	1.04796	1.12482	0.995727	1.10293
12756975	NM_001034423	PSMD7	chr18	0.287705	0.089605	0.635828	8.03733	8.1541	8.19165	7.99978	8.15889	7.91577	8.22441	8.0838	1.08431	1.14224	1.04646	1.12352
12749776	NM_001012287	BREH1	chr18	0.557303	0.089634	0.938772	5.6658	5.55564	5.77675	5.44469	5.839	5.4926	5.7145	5.39678	0.926486	1.25881	0.917323	0.935742
12749494	ENSBTAT00000008607	GABARAPL2	chr18	0.535162	0.0896984	0.0659651	9.9305	10.0333	10.1283	9.83544	10.2369	9.62408	10.0197	10.0468	1.07383	1.22508	0.860229	1.34046
12752672	BC149021	ZNF415	chr18	0.957783	0.0897134	0.63535	5.7447	5.73086	5.50534	5.97023	5.57446	5.91494	5.43621	6.02552	0.990453	0.724523	0.908616	1.07966
12870199	ENSBTAT00000002023	SLC34A2	chr6	0.194936	0.0897174	0.112063	8.76639	8.93932	8.96831	8.73741	8.98932	8.54347	8.94729	8.93135	1.12734	1.17357	0.971287	1.30847
12844365	XM_002686301	LHX8	chr3	0.53488	0.0897504	0.364097	6.09137	5.94315	6.22829	5.80622	6.19325	5.98949	6.26334	5.62296	0.902363	1.33985	1.04978	0.775645
12809623	NM_001101966	RBBP8	chr24	0.878551	0.0899058	0.349395	9.00073	9.01634	8.91782	9.09924	8.86158	9.13988	8.97407	9.05861	1.01088	0.881835	1.08109	0.94522
12756265	ENSBTAT00000018501	RRAD	chr18	0.193597	0.0900264	0.227735	6.66084	6.45831	6.69422	6.42493	6.88908	6.4326	6.49935	6.41727	0.869027	1.20521	0.763277	0.989429
12883799	NM_001166558	CD320	chr7	0.667344	0.0900274	0.488257	7.62979	7.69262	7.79068	7.53173	7.81017	7.4494	7.77119	7.61405	1.04452	1.19661	0.973344	1.1209
12857895	NM_001205568	PUS7L	chr5	0.450289	0.0902085	0.766862	5.14541	5.33168	5.02152	5.45557	4.96468	5.32614	5.07836	5.585	1.13782	0.740183	1.08199	1.19653
12763633	NM_001080286	SMG8	chr19	0.0654016	0.0902443	0.288529	6.73016	7.12801	6.74776	7.1104	6.65924	6.80108	6.83629	7.41973	1.31754	0.777741	1.13057	1.53543
12775687	NM_001024497	ANKZF1	chr2	0.222827	0.0904798	0.842454	6.9669	7.30066	6.89674	7.37083	6.70328	7.23053	7.0902	7.51113	1.26029	0.719918	1.3076	1.2147
12698429	NM_174066	GGCX	chr11	0.296545	0.090554	0.473264	6.44879	6.18242	6.0933	6.53791	6.31714	6.58044	5.86947	6.49538	0.83141	0.734786	0.733222	0.942747
12750040	NM_001075199	NUCB1	chr18	0.32776	0.0905889	0.659979	6.05667	5.93577	6.10406	5.88838	6.13767	5.97567	6.07046	5.80109	0.919615	1.16125	0.954479	0.886024
12894910	NM_001083491	ALG2	chr8	0.0844355	0.0906551	0.896393	7.14588	6.88889	6.89163	7.14315	7.02937	7.2624	6.75389	7.02389	0.83683	0.840012	0.826179	0.84762
12795583	NM_001015598	KBTBD5	chr22	0.210541	0.0907853	0.0515785	5.48691	5.73107	5.44056	5.77742	5.51536	5.45847	5.36576	6.09637	1.1844	0.791762	0.901504	1.55606
12789781	NM_001079587	ZFYVE21	chr21	0.535822	0.0908095	0.514027	5.58465	5.48263	5.38858	5.6787	5.49338	5.67591	5.28378	5.68149	0.931733	0.817834	0.864773	1.00388
12735252	NM_001045993	DNAJC11	chr16	0.55228	0.0912471	0.193869	8.86147	8.79899	8.73777	8.92269	8.69922	9.02371	8.77631	8.82167	0.957616	0.879697	1.05488	0.869317
12787542	NM_001046231	PPWD1	chr20	0.0524442	0.0913027	0.57298	7.70763	7.98929	7.96923	7.72769	7.86709	7.54817	8.07138	7.9072	1.21559	1.18226	1.15212	1.28256
12690508	ENSBTAT00000016066	ADCK1	chr10	0.117146	0.0913715	0.158079	5.18403	5.03804	5.03187	5.1902	5.0396	5.32846	5.02414	5.05194	0.903757	0.896064	0.989338	0.825579
12740901	ENSBTAT00000002064	GPATCH2	chr16	0.275226	0.0913829	0.495345	5.84491	6.12896	6.21272	5.76115	6.15841	5.53141	6.26703	5.99088	1.2176	1.36753	1.07819	1.37504
12828746	NM_001083750	POLR3A	chr28	0.271731	0.0914389	0.752872	6.84938	7.05193	6.79089	7.11041	6.66112	7.03764	6.92066	7.18319	1.15073	0.801336	1.1971	1.10615
12709715	NM_001075723	CCDC70	chr12	0.482402	0.0915939	0.717916	5.48084	5.24284	5.65883	5.06485	5.71699	5.24469	5.60067	4.885	0.847917	1.5094	0.922538	0.779332
12849745	ENSBTAT00000052122	NRF1	chr4	0.709103	0.0918316	0.767758	6.13855	6.07909	5.96842	6.24922	6.02167	6.25543	5.91518	6.243	0.959622	0.823139	0.928844	0.99142
12906774	NM_001192736	GLA	chrX	0.513169	0.0918818	0.197981	7.90152	8.0718	8.21493	7.75839	8.30077	7.50227	8.12908	8.01451	1.12527	1.37224	0.887804	1.42626
12698701	NM_174801	PPM1G	chr11	0.272658	0.0920456	0.169184	9.57863	9.64851	9.55845	9.66869	9.47922	9.67803	9.63768	9.65935	1.04963	0.926433	1.11609	0.98713
12828983	XM_002698810	IRF2BP2	chr28	0.251411	0.0923363	0.354535	5.9042	6.01245	5.8769	6.03976	5.86614	5.94227	5.88766	6.13725	1.07792	0.893253	1.01502	1.14471
12859857	NM_001192481	PLXNC1	chr5	0.745642	0.0923636	0.777103	6.48251	6.41862	6.2773	6.62384	6.33711	6.62791	6.21749	6.61976	0.956681	0.786471	0.920428	0.994363
12795452	NM_001205740	C22H3orf75	chr22	0.00439955	0.0924645	0.172858	5.30713	5.69566	5.60634	5.39645	5.49574	5.11852	5.71693	5.67438	1.30905	1.1566	1.16569	1.47005
12710135	NM_001077996	SPG20	chr12	0.792658	0.0928	0.332924	5.01361	5.09942	4.76957	5.34346	4.56639	5.46083	4.97275	5.2261	1.06129	0.671802	1.32534	0.849842
12679322	NM_001100314	PIK3R4	chr1	0.857731	0.0931687	0.716618	6.44837	6.47406	6.58709	6.33534	6.60029	6.29645	6.57389	6.37424	1.01797	1.19065	0.981861	1.0554
12814450	NM_001077011	GBAS	chr25	0.791534	0.0932539	0.791961	8.51867	8.57203	8.72255	8.36815	8.72249	8.31484	8.72261	8.42146	1.03769	1.27846	1.00008	1.07671
12696518	NM_001192099	ATG14	chr10	0.811098	0.0933315	0.341514	7.36186	7.40687	7.21909	7.54963	7.28738	7.43633	7.1508	7.66294	1.03169	0.795236	0.909669	1.17008
12815755	NM_001101868	KIF22	chr25	0.872346	0.093405	0.361755	7.64379	7.62106	7.50821	7.75664	7.58495	7.70263	7.43147	7.81064	0.984363	0.841814	0.899079	1.07774
12845742	NM_001102118	DDX20	chr3	0.151967	0.09357	0.16598	8.2584	8.03646	8.0159	8.27895	8.23394	8.28285	7.79787	8.27504	0.857411	0.833328	0.739144	0.994602
12865041	ENSBTAT00000009998	FKBP4	chr5	0.813443	0.0936616	0.751315	7.2899	7.23805	7.07136	7.45659	7.13212	7.44768	7.01059	7.46551	0.964697	0.765654	0.919209	1.01244
12710070	NM_001206537	COG3	chr12	0.637489	0.0936722	0.23986	6.47534	6.54098	6.62993	6.38639	6.68052	6.27017	6.57934	6.50261	1.04654	1.1839	0.932275	1.17482
12861107	ENSBTAT00000030419	TBC1D15	chr5	0.544258	0.0937192	0.209721	7.29341	7.36483	7.22642	7.43182	7.1154	7.47143	7.33744	7.39221	1.05075	0.867295	1.16639	0.946569
12679086	NM_001192976	TFG	chr1	0.355156	0.0937288	0.698794	9.76962	9.84125	9.87246	9.73841	9.85147	9.68777	9.89346	9.78904	1.0509	1.09737	1.02953	1.07272
12801905	NM_001034450	POLH	chr23	0.920753	0.0938805	0.346661	5.09345	5.11575	4.90806	5.30114	5.0039	5.18299	4.81222	5.41928	1.01558	0.761506	0.875585	1.17796
12759670	NM_001077008	SERTAD3	chr18	0.137675	0.0940235	0.529807	7.99691	8.25607	7.97887	8.27411	7.79603	8.19779	8.16171	8.35044	1.19679	0.814934	1.28849	1.11161
12840025	NM_001076036	SSX2IP	chr3	0.872668	0.0941274	0.8623	6.38367	6.34589	6.57124	6.15832	6.56968	6.19766	6.57279	6.11898	0.974149	1.33137	1.00216	0.946922
12841845	NM_001083530	S100A3	chr3	0.293573	0.0941959	0.180226	6.65069	6.98566	7.09258	6.54377	7.14121	6.16017	7.04395	6.92737	1.26135	1.46288	0.934812	1.70196
12820005	NM_001101114	ZRANB1	chr26	0.388176	0.0942816	0.380872	8.01439	7.85435	7.77392	8.09482	7.77265	8.25612	7.77519	7.93351	0.895003	0.80057	1.00176	0.799623
12711992	BC149304	CAB39L	chr12	0.892208	0.0944373	0.782162	7.18084	7.21084	7.00215	7.38954	7.01779	7.3439	6.98652	7.43517	1.02101	0.764513	0.978558	1.06531
12736405	ENSBTAT00000020778	SDF4	chr16	0.112529	0.0944651	0.790701	5.80982	6.10312	6.11172	5.80122	5.98864	5.63101	6.2348	5.97144	1.22544	1.24013	1.18604	1.26614
12824460	NM_001046535	RBPMS	chr27	0.136769	0.0944955	0.623568	9.26685	9.05517	9.2811	9.04092	9.42076	9.11295	9.14145	8.96889	0.86353	1.18114	0.823988	0.904969
12693887	ENSBTAT00000008922	MED6	chr10	0.308385	0.0946078	0.164743	7.3305	7.52647	7.263	7.59397	7.0294	7.63159	7.49659	7.55636	1.1455	0.794999	1.38241	0.949191
12825556	---	---	chr27	0.103708	0.0946433	0.892236	6.33481	6.06212	6.33886	6.05807	6.48609	6.18354	6.19163	5.9326	0.82777	1.21486	0.815382	0.840347
12691034	ENSBTAT00000021183	DNAL1	chr10	0.668495	0.0949394	0.424516	5.64679	5.75826	5.47577	5.92928	5.31533	5.97825	5.6362	5.88031	1.08033	0.730261	1.24909	0.934365
12786691	XM_003587506	LOC783613	chr20	0.0171285	0.0949618	0.287747	6.94374	6.0126	6.78884	6.1675	7.06191	6.82556	6.51577	5.50943	0.524444	1.53831	0.684847	0.40161
12866683	NM_001205910	SLC41A2	chr5	0.751323	0.0950045	0.715238	6.45372	6.54794	6.7601	6.24155	6.76726	6.14019	6.75295	6.34292	1.06748	1.43252	0.990132	1.15088
12877704	NM_001206692	QTRT1	chr7	0.310735	0.095023	0.839458	6.96817	7.16081	6.90123	7.22775	6.78597	7.15038	7.01649	7.30512	1.14285	0.79746	1.17326	1.11322
12698749	NM_001206502	DNMT3A	chr11	0.408718	0.0951016	0.535484	7.13567	7.02798	6.96924	7.19441	6.9829	7.28844	6.95559	7.10037	0.928075	0.855499	0.981252	0.877779
12907794	NM_001172039	RBMX	chrX	0.962603	0.0951397	0.768179	9.57755	9.58094	9.64228	9.5162	9.62994	9.52516	9.65463	9.50724	1.00235	1.09133	1.01727	0.987651
12760706	NM_001012669	FASN	chr19	0.548441	0.0951641	0.842233	7.89601	7.98187	7.81475	8.06313	7.75766	8.03437	7.87185	8.0919	1.06132	0.841841	1.08237	1.04068
12767469	NM_174617	STAT5B	chr19	0.619533	0.0952688	0.0989318	6.35187	6.4603	6.21625	6.59592	5.97447	6.72928	6.45804	6.46255	1.07805	0.768619	1.3982	0.831204
12853375	XM_002686979	PRKAG2	chr4	0.0249051	0.0953498	0.089504	5.42155	5.14083	5.18066	5.38172	5.42354	5.41956	4.93779	5.34388	0.823183	0.869914	0.714125	0.948897
12839395	NM_001206930	ZCCHC11	chr3	0.685922	0.0956131	0.807887	6.59919	6.48892	6.30696	6.78115	6.39519	6.80319	6.21872	6.75911	0.926412	0.719869	0.884866	0.969908
12711817	NM_001098032	CKAP2	chr12	0.0564097	0.0958262	0.654038	9.21351	9.36073	9.35046	9.22378	9.2932	9.13382	9.40773	9.31374	1.10743	1.09178	1.08262	1.13282
12721948	NM_001035009	NDRG1	chr14	0.891701	0.0959268	0.129993	7.2273	7.25259	7.40161	7.07828	7.53484	6.91977	7.26839	7.23679	1.01768	1.25122	0.831359	1.24576
12838179	NM_001014918	ORC1	chr3	0.810601	0.0961656	0.709092	9.59099	9.60768	9.53877	9.6599	9.51741	9.66457	9.56013	9.65524	1.01164	0.919465	1.03005	0.993554
12834845	BC148888	MSANTD2	chr29	0.946115	0.0961813	0.223475	7.49785	7.50915	7.35805	7.64896	7.24818	7.74753	7.46791	7.5504	1.00786	0.817382	1.16452	0.872282
12894559	ENSBTAT00000029363	CBR4	chr8	0.159338	0.09643	0.731512	7.32286	7.51189	7.30428	7.53047	7.18741	7.45832	7.42116	7.60263	1.14	0.85489	1.17589	1.10521
12755952	NM_174806	GOT2	chr18	0.433416	0.0964889	0.091052	7.82785	7.9592	7.7492	8.03785	7.83048	7.82521	7.66791	8.2505	1.09532	0.818663	0.893431	1.34284
12897148	NM_001206593	KIAA1009	chr9	0.265283	0.096575	0.362058	5.28231	5.57333	5.20531	5.65034	4.94153	5.62309	5.46908	5.67758	1.2235	0.734568	1.44147	1.03849
12695717	NM_001103265	C10H14orf21	chr10	0.00283098	0.0965758	0.210291	6.69056	6.37666	6.45493	6.61229	6.67005	6.71107	6.23982	6.51351	0.804468	0.89667	0.742145	0.872024
12878922	NM_001040522	HNRNPAB	chr7	0.317824	0.0965958	0.942572	10.4163	10.3546	10.3327	10.4383	10.3613	10.4713	10.304	10.4053	0.958151	0.929427	0.961062	0.955249
12681617	ENSBTAT00000044136	SLC9A9	chr1	0.0159204	0.096762	0.147117	5.28025	4.68352	4.78659	5.17718	4.9163	5.64421	4.65688	4.71016	0.66125	0.762816	0.835425	0.523387
12876313	XM_002689283	SPINK7	chr7	0.772531	0.0967888	0.423472	6.89152	6.73446	6.34178	7.2842	6.63972	7.14332	6.04383	7.42508	0.896849	0.520357	0.661639	1.21567
12842602	NM_001013585	S1PR1	chr3	0.146953	0.096891	0.73734	5.93332	5.70466	5.95126	5.68672	6.04	5.82664	5.86253	5.54679	0.853427	1.20126	0.884255	0.823675
12828537	NM_001206133	ARID4B	chr28	0.0494326	0.0969401	0.772969	7.03083	7.28837	7.05279	7.2664	6.90625	7.15541	7.19933	7.3774	1.19544	0.862374	1.22526	1.16634
12722399	NM_001098037	RECQL4	chr14	0.00713243	0.0971435	0.397661	5.83164	5.60451	5.78299	5.65316	5.86454	5.79874	5.70144	5.50758	0.854331	1.09416	0.893102	0.817242
12686760	NM_001076347	PSMG1	chr1	0.0889846	0.0972832	0.00522559	9.91902	10.0694	10.0674	9.92108	10.1264	9.71168	10.0084	10.1305	1.10989	1.10672	0.921487	1.3368
12875345	ENSBTAT00000053721	ZNF518B	chr6	0.7955	0.0973308	0.851267	6.78675	6.72151	6.53616	6.97209	6.54519	7.0283	6.52713	6.91589	0.955788	0.739214	0.987556	0.925041
12898542	NM_001205704	RWDD2A	chr9	0.702012	0.0973698	0.0458219	4.97618	4.80465	5.27808	4.50275	5.84057	4.11179	4.7156	4.89371	0.887902	1.71159	0.458511	1.71941
12821102	ENSBTAT00000039939	LOC783804	chr26	0.54683	0.0974403	0.727772	7.36194	7.22909	7.10557	7.48546	7.13377	7.59011	7.07737	7.38082	0.912033	0.768495	0.961665	0.864963
12823642	NM_001143857	WRN	chr27	0.24389	0.0975725	0.155299	6.06789	6.28257	6.01912	6.33134	6.0441	6.09168	5.99414	6.57101	1.16045	0.805398	0.965966	1.39409
12817770	ENSBTAT00000037527 // ENSBTAT00000037527	SRRM2 // LOC534002	chr25	0.0970564	0.097666	0.486634	8.42285	8.5957	8.59552	8.42302	8.47418	8.37151	8.71687	8.47452	1.12728	1.12702	1.18319	1.07402
12867761	NM_001076130	COQ10A	chr5	0.929157	0.0978118	0.205591	5.92005	5.89674	6.13526	5.68153	6.31717	5.52293	5.95336	5.84012	0.983975	1.36959	0.777113	1.2459
12779642	NM_001083529	PLEKHB2	chr2	0.239838	0.0978998	0.442965	6.8292	7.044	7.09124	6.78197	6.91463	6.74377	7.26785	6.82016	1.16054	1.23908	1.2774	1.05437
12811411	ENSBTAT00000012423	RBBP6	chr25	0.236585	0.0980826	0.407008	9.14064	9.00135	8.9715	9.17048	8.99292	9.28835	8.95009	9.05261	0.907969	0.871167	0.97075	0.849248
12741030	NM_001193037	SERTAD4	chr16	0.622359	0.0987032	0.971237	5.04662	4.9731	5.13819	4.88154	5.17763	4.91562	5.09875	4.84746	0.950317	1.1947	0.946792	0.953855
12869493	NM_001191346	BBS7	chr6	0.68645	0.0987789	0.804255	5.24038	5.3554	5.54307	5.05271	5.45032	5.03045	5.63583	5.07496	1.08299	1.4048	1.13722	1.03134
12821858	ENSBTAT00000027058	MTG1	chr26	0.279052	0.0988251	0.712387	5.72003	5.53092	5.77337	5.47758	5.8996	5.54047	5.64714	5.41469	0.877143	1.22756	0.839467	0.916511
12824769	NM_174189	STAR	chr27	0.735782	0.0989485	0.79754	5.07682	4.96267	4.72855	5.31094	4.82899	5.32466	4.62811	5.29722	0.923922	0.667857	0.870023	0.98116
12681981	NM_001102233	DCUN1D1	chr1	0.622894	0.0990243	0.613213	6.84594	6.93991	7.05702	6.72883	6.96173	6.73015	7.15231	6.7275	1.0673	1.25544	1.14122	0.998167
12722290	XM_003583011	FBXL6	chr14	0.447257	0.0990677	0.416391	6.43685	6.28553	6.19115	6.53123	6.34782	6.52588	6.03447	6.53659	0.900426	0.789993	0.80477	1.00745
12787671	ENSBTAT00000047363	SKIV2L2	chr20	0.763761	0.0991102	0.54953	8.0146	8.04981	7.93135	8.13306	7.87852	8.15067	7.98418	8.11545	1.02471	0.869521	1.07598	0.975887
12840786	XM_002686425	TESK2	chr3	0.0340263	0.0991302	0.577021	6.26785	6.62605	6.31167	6.58223	6.17656	6.35913	6.44677	6.80532	1.28183	0.828996	1.20599	1.36244
12707406	ENSBTAT00000009353	TXNDC9	chr11	0.724714	0.0996152	0.464288	7.38494	7.44254	7.55419	7.27329	7.58564	7.18424	7.52275	7.36233	1.04073	1.21496	0.957347	1.13138
12906626	BC149033	SYN1	chrX	0.141015	0.0996526	0.110129	5.01609	5.24352	5.25815	5.00147	5.02023	5.01195	5.49606	4.99098	1.17075	1.19472	1.39072	0.985568
12694419	ENSBTAT00000061216	NIN	chr10	0.617703	0.0996832	0.77088	6.24799	6.32127	6.41044	6.15882	6.35248	6.1435	6.46841	6.17414	1.05211	1.19055	1.08367	1.02146
12685787	NM_001046381	IQCB1	chr1	0.0862896	0.0996914	0.267641	7.72312	7.95754	7.9524	7.72826	7.76154	7.68471	8.14325	7.77182	1.17643	1.16807	1.30288	1.06225
12782511	NM_001075907	WDR12	chr2	0.999663	0.100117	0.0377263	8.50933	8.50928	8.40505	8.61356	8.5404	8.47826	8.2697	8.74886	0.999965	0.86543	0.828917	1.20631
12745798	ENSBTAT00000023205	DUSP18	chr17	0.312982	0.10051	0.0959771	5.00057	4.84337	5.05348	4.79046	4.99862	5.00252	5.10833	4.5784	0.89676	1.19998	1.07901	0.745295
12904333	NM_001205389	CHM	chrX	0.324127	0.10069	0.0494185	5.0262	4.76877	5.11788	4.67708	4.97762	5.07478	5.25815	4.27938	0.836577	1.35736	1.21465	0.576185
12824387	ENSBTAT00000011697	LOC535434	chr27	0.25637	0.100734	0.401477	5.86303	5.64351	5.59085	5.91569	5.62024	6.10582	5.56146	5.72555	0.85885	0.798391	0.960074	0.768298
12757297	NM_001205790	SALL1	chr18	0.459973	0.100797	0.10294	5.39272	5.27573	5.19968	5.46876	5.12455	5.66088	5.27482	5.27664	0.92211	0.82985	1.10977	0.766182
12715848	NM_001034557	NSFL1C	chr13	0.765774	0.100805	0.157668	9.20546	9.17438	9.10061	9.27923	9.19218	9.21875	9.00905	9.33972	0.978686	0.883549	0.880788	1.08746
12837709	NM_001206991	NRD1	chr3	0.635035	0.100855	0.506887	8.66449	8.70219	8.61553	8.75115	8.62312	8.70586	8.60793	8.79644	1.02647	0.910275	0.989523	1.0648
12853698	NM_001199002	YAE1D1	chr4	0.927341	0.100867	0.233896	7.68179	7.67116	7.5766	7.77635	7.65288	7.7107	7.50031	7.84201	0.99266	0.870696	0.899647	1.09529
12874139	NM_001075614	LETM1	chr6	0.927264	0.101022	0.835465	7.06969	7.07996	6.97851	7.17115	6.98506	7.15433	6.97196	7.18796	1.00714	0.875004	0.990958	1.02359
12723906	NM_001083766	PTP4A3	chr14	0.896828	0.101092	0.935734	5.14281	5.10188	5.39259	4.85209	5.40033	4.88528	5.38485	4.81891	0.972029	1.45447	0.989326	0.955034
12822732	ENSBTAT00000004287	LOC534506	chr26	0.0525031	0.101108	0.18767	6.02224	5.60708	5.98709	5.64223	6.33109	5.7134	5.6431	5.57107	0.749937	1.27002	0.620718	0.906056
12766038	ENSBTAT00000043093	MSL1	chr19	0.904015	0.101114	0.440213	6.97946	6.94979	6.75393	7.17532	6.86463	7.09429	6.64323	7.25634	0.97964	0.746705	0.857731	1.11888
12791755	ENSBTAT00000004070	CHRNA3	chr21	0.877162	0.101193	0.60232	5.37894	5.42085	5.16787	5.63192	5.076	5.68188	5.25974	5.58195	1.02947	0.724951	1.13582	0.933081
12776966	XM_600652	SYF2	chr2	0.335978	0.101252	0.676346	9.45162	9.37291	9.34328	9.48125	9.36576	9.53747	9.3208	9.42503	0.946908	0.9088	0.969312	0.925022
12902925	NM_174518	CITED1	chrX	0.234755	0.10134	0.595861	8.73553	9.17831	9.26862	8.64522	9.14426	8.3268	9.39298	8.96364	1.35922	1.5405	1.18815	1.55491
12902219	BC149868	GPRASP1	chrX	0.779956	0.101377	0.0500282	5.09446	5.0129	5.30315	4.80421	5.03972	5.1492	5.56658	4.45923	0.945038	1.41317	1.44079	0.619867
12736543	NM_001083459	SNRPE	chr16	0.542384	0.101429	0.96523	11.1417	11.1916	11.0969	11.2364	11.0736	11.2097	11.1201	11.2632	1.03526	0.90779	1.03271	1.03781
12705390	BC149599	TGOLN2	chr11	0.45305	0.101501	0.499143	7.72937	7.61673	7.8003	7.5458	7.80598	7.65277	7.79462	7.43884	0.92489	1.19292	0.992158	0.862183
12718747	ENSBTAT00000043137	ZNF217	chr13	0.32051	0.1019	0.441508	5.55972	5.35751	5.62975	5.28748	5.65302	5.46642	5.60647	5.10855	0.86922	1.26774	0.968254	0.780314
12792860	NM_001099030	KLHL28	chr21	0.742269	0.10193	0.0344761	8.3531	8.31521	8.23593	8.43238	8.12404	8.58216	8.34782	8.2826	0.974083	0.872695	1.1678	0.812503
12760520	XM_002702210	PSME3	chr19	0.42258	0.102043	0.55539	9.09611	9.19732	9.25335	9.04007	9.23978	8.95244	9.26692	9.12771	1.07267	1.15932	1.01899	1.12917
12730020	NM_001193125	PRRG4	chr15	0.198819	0.102125	0.175558	7.17626	7.54135	7.12266	7.59496	6.7471	7.60543	7.49822	7.58449	1.28796	0.720816	1.6831	0.985588
12705573	NM_001205763	TMEM127	chr11	0.996381	0.10213	0.0049883	7.04495	7.04548	7.14538	6.94504	7.33302	6.75687	6.95773	7.13322	1.00037	1.14896	0.770949	1.29806
12787041	NM_175800	NDUFS4	chr20	0.880506	0.102194	0.373263	10.0031	9.99093	9.92807	10.0659	9.89773	10.1084	9.95842	10.0234	0.991616	0.908862	1.04297	0.942791
12836105	NM_174785	GNG12	chr3	0.0283283	0.102208	0.476431	6.12064	7.14535	6.26449	7.0015	5.59714	6.64414	6.93184	7.35886	2.03455	0.599983	2.52223	1.64116
12768310	NM_001205593	CBX2	chr19	0.685369	0.102221	0.423118	5.05031	4.99696	4.91155	5.13572	4.88507	5.21555	4.93802	5.05589	0.963692	0.856085	1.03738	0.895234
12697740	XM_002691041	DCAF5	chr10	0.538494	0.102221	0.744266	6.08789	6.2404	5.95384	6.37444	5.83732	6.33845	6.07036	6.41043	1.1115	0.747114	1.17531	1.05116
12722811	NM_001193015	CSPP1	chr14	0.642015	0.102241	0.709917	6.9142	6.99793	6.80291	7.10922	6.72759	7.10081	6.87823	7.11763	1.05975	0.808708	1.11006	1.01173
12836031	NM_174602	SLC2A1	chr3	0.493953	0.102341	0.774333	8.28359	8.41193	8.50661	8.18891	8.41571	8.15147	8.59751	8.22635	1.09304	1.24634	1.1343	1.05327
12754155	NM_001099177	TCF25	chr18	0.289858	0.102489	0.770993	6.41307	6.6145	6.35443	6.67314	6.22647	6.59967	6.48238	6.74662	1.14984	0.801782	1.19409	1.10723
12771526	ENSBTAT00000019440	BPTF	chr19	0.424674	0.102609	0.0807001	7.83658	7.90506	7.79846	7.94319	7.6863	7.98687	7.91063	7.8995	1.04861	0.904552	1.16823	0.941237
12719694	XM_002692364	GPCPD1	chr13	0.419451	0.102687	0.0902235	10.626	10.6718	10.601	10.6968	10.5282	10.7237	10.6738	10.6698	1.03229	0.935769	1.10621	0.963318
12786547	NM_001206619	SREK1IP1	chr20	0.625257	0.102693	0.26969	8.05703	7.97158	8.16281	7.86581	8.10744	8.00663	8.21817	7.725	0.942493	1.22858	1.07978	0.822661
12731291	ENSBTAT00000028456	CCDC34	chr15	0.392513	0.102719	0.599102	7.03883	7.19267	6.96426	7.26724	6.8404	7.23727	7.08812	7.29721	1.11252	0.810577	1.18733	1.04243
12899830	ENSBTAT00000022780	STX7	chr9	0.874715	0.102813	0.117929	8.05942	8.04056	8.15186	7.94812	8.06401	8.05484	8.23972	7.8414	0.987008	1.15168	1.12952	0.862477
12819310	ENSBTAT00000005261	LCOR	chr26	0.672295	0.103004	0.960418	8.10916	8.17684	8.2788	8.00719	8.24892	7.9694	8.30868	8.04499	1.04803	1.20715	1.04229	1.0538
12690871	ENSBTAT00000015487	CEP152	chr10	0.0583583	0.103049	0.0850332	6.35246	6.03799	6.06187	6.32858	6.07752	6.62741	6.04623	6.02975	0.804144	0.831215	0.978546	0.660824
12816646	ENSBTAT00000022697	WBSCR22	chr25	0.24625	0.103061	0.273571	9.34506	9.19058	9.15686	9.37878	9.30687	9.38326	9.00685	9.3743	0.898451	0.857424	0.812241	0.993811
12861658	NM_001025344	NANOG	chr5	0.822898	0.103232	0.406726	6.529	6.59342	6.31659	6.80583	6.16376	6.89425	6.46943	6.71741	1.04566	0.712402	1.23599	0.884643
12862336	NM_001105437	KCTD17	chr5	0.596642	0.103408	0.446855	6.04293	5.99478	5.94185	6.09586	6.0007	6.08517	5.883	6.10656	0.967173	0.898746	0.921655	1.01494
12759859	BC148976	LOC785630	chr18	0.0876496	0.103758	0.213593	7.62807	7.95299	7.94459	7.63646	7.66646	7.58968	8.22273	7.68325	1.2526	1.2381	1.47047	1.06701
12769414	NM_001101933	TSR1	chr19	0.409848	0.103835	0.749396	8.25595	8.15668	8.30746	8.10516	8.37615	8.13574	8.23877	8.07459	0.933507	1.15053	0.909165	0.958501
12860714	NM_001102132	CERS5	chr5	0.612585	0.104186	0.210926	7.50995	7.45391	7.5754	7.38846	7.67412	7.34578	7.47667	7.43115	0.961901	1.13834	0.872091	1.06096
12682028	NM_001206766	TOPBP1	chr1	0.52133	0.104257	0.949773	8.34962	8.40805	8.30209	8.45557	8.27573	8.42351	8.32845	8.48764	1.04133	0.899077	1.03722	1.04545
12696539	ENSBTAT00000064221	CDAN1	chr10	0.556246	0.104268	0.40107	5.12456	5.01622	4.91515	5.22563	5.04707	5.20205	4.78322	5.24921	0.927654	0.806372	0.832865	1.03323
12773503	NM_001191244	GPR179	chr19	0.944392	0.104282	0.810834	4.98902	4.97988	4.87336	5.09555	4.89362	5.08443	4.85309	5.10668	0.993684	0.85726	0.972295	1.01554
12777605	NM_001102141	XRCC5	chr2	0.80049	0.104317	0.0547123	6.23141	6.17463	6.01273	6.39331	6.27015	6.19267	5.75531	6.59395	0.961404	0.76813	0.69987	1.32067
12689859	XM_601152	KIAA1370	chr10	0.105064	0.104446	0.50228	7.36105	7.06306	7.06277	7.36134	7.15224	7.56986	6.9733	7.15281	0.813384	0.813059	0.883352	0.748957
12902126	XM_002704155	LOC100336193	chrU_7180002014383	0.982951	0.10448	0.288954	5.56024	5.55741	5.67121	5.44643	5.60101	5.51947	5.74142	5.37339	0.998037	1.1686	1.10221	0.903708
12815150	NM_173942	CPSF4	chr25	0.58907	0.10466	0.838788	5.30998	5.42858	5.55432	5.18424	5.51727	5.1027	5.59138	5.26578	1.08568	1.29243	1.05271	1.11967
12768959	NM_001097998	TMEM11	chr19	0.530211	0.104791	0.185879	7.66906	7.51947	7.39381	7.79472	7.62974	7.70838	7.15787	7.88107	0.901506	0.757377	0.721031	1.12716
12837074	NM_001101875	TXNIP	chr3	0.519812	0.104793	0.518349	5.75413	5.91424	6.04335	5.62503	6.04363	5.46464	6.04306	5.78541	1.11737	1.33637	0.999606	1.249
12756905	ENSBTAT00000020510	TMEM231	chr18	0.270576	0.104829	0.0903062	6.28254	6.46309	6.50883	6.23681	6.56115	6.00394	6.4565	6.46968	1.13332	1.2075	0.930031	1.38103
12860935	NM_001075985	HEBP1	chr5	0.572749	0.104955	0.879825	8.48759	8.5582	8.62827	8.41752	8.60238	8.3728	8.65415	8.46224	1.05016	1.15729	1.03654	1.06396
12820951	NM_001035462	IPMK	chr26	0.149129	0.104992	0.769421	9.00265	9.13861	9.14771	8.99355	9.09311	8.9122	9.20232	9.0749	1.09882	1.11277	1.07864	1.11938
12749946	NM_001040503	ZNF575	chr18	0.202571	0.105147	0.507713	5.87186	5.61837	5.90895	5.58127	6.10033	5.64338	5.71758	5.51916	0.838866	1.255	0.766972	0.917498
12685379	NM_001192676	C2CD2	chr1	0.508485	0.105265	0.438392	7.17274	7.09315	7.03192	7.23397	7.11847	7.227	6.94536	7.24094	0.946328	0.869314	0.886929	1.0097
12711770	NM_001110786	IFT88	chr12	0.73439	0.105278	0.0902239	5.56055	5.4751	5.30534	5.7303	5.12493	5.99618	5.48576	5.46443	0.942487	0.744861	1.28417	0.691715
12742923	NM_001075785	SIRT4	chr17	0.422997	0.105353	0.0827704	6.12397	6.35898	5.99618	6.48677	5.61421	6.63372	6.37814	6.33981	1.17692	0.711732	1.69811	0.815689
12700468	NM_001191409	RABGAP1	chr11	0.699164	0.105526	0.616966	7.30295	7.36482	7.199	7.46877	7.12796	7.47794	7.27004	7.4596	1.04382	0.829451	1.10349	0.987372
12720745	NM_001099716	FOXS1	chr13	0.601003	0.105544	0.215673	4.98354	4.90188	4.81142	5.07401	4.75359	5.2135	4.86925	4.93451	0.944967	0.833592	1.08347	0.82417
12877798	ENSBTAT00000007344	MCOLN1	chr7	0.123142	0.105577	0.489787	7.93221	7.68103	7.93899	7.67425	8.01003	7.8544	7.86794	7.49411	0.840205	1.20141	0.906207	0.77901
12726044	ENSBTAT00000019090	SDC2	chr14	0.616898	0.105589	0.236416	6.35686	6.46354	6.58955	6.23085	6.66484	6.04887	6.51427	6.41282	1.07675	1.28228	0.900896	1.28694
12804841	NM_001035012	RIPK1	chr23	0.521881	0.105712	0.498769	5.03366	5.15155	5.24694	4.93826	5.1257	4.94162	5.36819	4.9349	1.08515	1.23858	1.18304	0.995355
12862431	NM_001076421	SPIC	chr5	0.73378	0.10579	0.939926	7.90355	7.96364	8.08241	7.78478	8.05901	7.74809	8.10581	7.82147	1.04253	1.22912	1.03297	1.05218
12853704	NM_001083395	ZNF277	chr4	0.0250546	0.105951	0.0329665	7.44164	7.83708	7.77642	7.50231	7.76539	7.1179	7.78745	7.88672	1.31534	1.20924	1.01541	1.70388
12731530	NM_001192998	USP28	chr15	0.581891	0.105961	0.919072	6.3835	6.30128	6.46771	6.21707	6.51637	6.25063	6.41906	6.18351	0.944604	1.18973	0.934769	0.954543
12782215	NM_001035346	DHDDS	chr2	0.148265	0.106077	0.310156	7.42915	7.79144	7.40606	7.81454	7.09992	7.75838	7.71219	7.87069	1.28547	0.753417	1.52866	1.08096
12742828	NM_001098044	C17H22orf13	chr17	0.205984	0.106143	0.189137	5.44296	5.57074	5.42386	5.58984	5.29349	5.59242	5.55422	5.58726	1.09261	0.891319	1.19809	0.996426
12893285	BT021202	FAM214B	chr8	0.918839	0.106392	0.783434	7.19653	7.18412	7.29284	7.08781	7.31579	7.07726	7.26989	7.09835	0.991438	1.15272	0.968685	1.01473
12761345	NM_183364	G6PC3	chr19	0.20802	0.106414	0.342146	6.57616	6.28403	6.62056	6.23963	6.87561	6.27671	6.36551	6.20256	0.816698	1.30218	0.702172	0.949902
12697199	NM_001046573	SNAPC5	chr10	0.0877186	0.10643	0.215024	5.72846	6.19457	6.18074	5.74229	6.11312	5.3438	6.24836	6.14078	1.38138	1.35515	1.09827	1.73746
12759635	NM_001195052	CBLN1	chr18	0.228805	0.106484	0.389391	6.0967	6.35496	6.40235	6.04931	6.36452	5.82889	6.44017	6.26974	1.19603	1.27724	1.05384	1.35741
12816002	NM_001191468	GTF2IRD1	chr25	0.947923	0.10661	0.357377	5.50437	5.512	5.6065	5.40986	5.65718	5.35155	5.55582	5.46817	1.0053	1.14603	0.932154	1.08419
12838599	NM_001046217	ISG20L2	chr3	0.27395	0.106907	0.611353	8.31592	8.09953	8.37087	8.04458	8.52856	8.10328	8.21318	7.98589	0.86072	1.25378	0.803641	0.921853
12807027	---	---	chr23	0.434098	0.106995	0.393176	9.64758	9.77469	9.57586	9.84641	9.44279	9.85237	9.70892	9.84046	1.0921	0.829001	1.20258	0.991778
12897327	NM_001040537	GTF2H5	chr9	0.543007	0.10713	0.873507	10.2648	10.3301	10.2078	10.3871	10.1667	10.363	10.249	10.4113	1.04628	0.883141	1.05868	1.03403
12785106	NM_174394	MYO10	chr20	0.869948	0.107146	0.612906	5.45131	5.4192	5.59998	5.27054	5.56624	5.33638	5.63371	5.20469	0.97799	1.25652	1.04788	0.91276
12826162	NM_001075455	VPS26A	chr28	0.727496	0.107209	0.0966555	7.64119	7.58076	7.46556	7.75639	7.3454	7.93698	7.58572	7.5758	0.958977	0.81743	1.18126	0.778524
12750290	NM_001192129	PDCD2L	chr18	0.672518	0.107406	0.424992	7.14095	7.09724	7.03252	7.20566	7.01282	7.26907	7.05222	7.14226	0.970159	0.886911	1.02768	0.915853
12720492	NM_001034615	TPD52L2	chr13	0.220404	0.10743	0.540311	7.18537	7.35016	7.15757	7.37796	7.1156	7.25513	7.19954	7.50079	1.12101	0.858335	1.05991	1.18563
12720062	NM_001206522	CRNKL1	chr13	0.389237	0.107446	0.552191	8.18316	8.08827	8.22714	8.04429	8.24203	8.12429	8.21225	7.96429	0.936342	1.13513	0.979568	0.895023
12867556	NM_001076088	CREBL2	chr5	0.378403	0.107482	0.484943	5.81558	6.10354	5.68855	6.23057	5.43095	6.20021	5.94615	6.26092	1.22091	0.686812	1.42919	1.04298
12803728	BC149118	C23H6orf89	chr23	0.1955	0.107483	0.0639767	5.50688	5.78776	5.47005	5.82459	5.12275	5.89101	5.81735	5.75817	1.21494	0.78212	1.61843	0.912039
12860149	NM_001101103	SLC11A2	chr5	0.0681739	0.107597	0.235415	5.39444	4.72243	4.76559	5.35128	4.88978	5.8991	4.64139	4.80347	0.627631	0.666327	0.841832	0.467932
12743174	ENSBTAT00000029478	KREMEN1	chr17	0.940259	0.107627	0.315402	6.48304	6.50035	6.68549	6.2979	6.559	6.40709	6.81199	6.18872	1.01207	1.30821	1.19168	0.859535
12705102	NM_001206163	SNRNP200	chr11	0.46614	0.10765	0.899993	8.14649	8.21281	8.25534	8.10396	8.21652	8.07647	8.29417	8.13144	1.04704	1.11063	1.0553	1.03884
12880531	XM_613288	SLC35E1	chr7	0.859831	0.10773	0.151231	7.96611	8.00445	8.16727	7.80329	8.30908	7.62314	8.02545	7.98344	1.02693	1.28697	0.821521	1.28369
12756446	BC102084	ECH1	chr18	0.978897	0.107912	0.145187	5.73119	5.72608	5.89035	5.56692	5.74748	5.7149	6.03323	5.41894	0.996469	1.2513	1.21905	0.814531
12812425	NM_001166612	SNRNP25	chr25	0.122518	0.107981	0.609265	9.66212	9.79993	9.65908	9.80298	9.56814	9.75611	9.75001	9.84985	1.10023	0.905068	1.13435	1.06714
12750514	NM_001101909	KATNB1	chr18	0.688742	0.108133	0.730074	5.96195	5.90153	5.8057	6.05778	5.86191	6.06199	5.74948	6.05358	0.958983	0.839682	0.925026	0.994186
12753982	NM_001076472	UBE2S	chr18	0.562952	0.108172	0.408227	8.86525	8.94114	9.0125	8.7939	9.02911	8.7014	8.99589	8.8864	1.05401	1.1636	0.977236	1.13681
12910551	NM_001098157	ZBTB33	chrX	0.975094	0.108413	0.83138	6.26535	6.27333	6.48322	6.05547	6.50645	6.02426	6.45998	6.08668	1.00554	1.34513	0.968302	1.04422
12795330	NM_001098015	QRICH1	chr22	0.400184	0.108557	0.226976	8.39061	8.28459	8.23336	8.44184	8.2093	8.57191	8.25741	8.31176	0.929147	0.865447	1.03391	0.835003
12877262	NM_001166519	MFAP3	chr7	0.586918	0.108667	0.290586	7.9914	8.07998	7.89999	8.17139	7.943	8.03981	7.85698	8.30298	1.06332	0.828511	0.942118	1.20011
12721089	NM_001034811	AP5S1	chr13	0.0769315	0.108826	0.404344	5.91243	6.20553	5.92734	6.19062	5.71439	6.11046	6.14029	6.27077	1.22527	0.833191	1.34341	1.11753
12726283	XM_002692625	RNF139	chr14	0.473899	0.108896	0.883207	8.00202	7.86107	8.09469	7.76841	8.15082	7.85322	8.03855	7.68359	0.906924	1.25378	0.925137	0.889069
12688778	NM_001014889	PSME2	chr10	0.199662	0.108967	0.133046	6.82341	7.09543	6.78685	7.13199	6.48994	7.15689	7.08376	7.10709	1.20749	0.78723	1.50924	0.966072
12799096	ENSBTAT00000005016	CSRNP1	chr22	0.168521	0.109056	0.784947	6.25956	6.48068	6.50021	6.24003	6.41093	6.1082	6.5895	6.37187	1.16564	1.19763	1.13176	1.20052
12740964	NM_001038576	APITD1	chr16	0.236888	0.109153	0.0413982	9.30991	9.5273	9.26855	9.56867	8.9637	9.65613	9.5734	9.4812	1.16263	0.812186	1.52595	0.885812
12890428	NM_001076859	RG9MTD3	chr8	0.219873	0.109498	0.259661	7.89168	8.15065	7.84931	8.19302	7.60132	8.18205	8.0973	8.204	1.19662	0.788009	1.41028	1.01533
12883986	ENSBTAT00000017099	ZNF77	chr7	0.855289	0.109519	0.450788	5.28945	5.3315	5.11824	5.50272	5.18491	5.394	5.05158	5.61143	1.02958	0.766059	0.911726	1.16266
12692792	NM_001105477	POLR2M	chr10	0.135326	0.109859	0.27029	8.2329	8.38789	8.3938	8.22699	8.26005	8.20575	8.52756	8.24822	1.11341	1.12258	1.20373	1.02987
12768020	NM_001097984	ALDOC	chr19	0.929205	0.110107	0.365823	6.43419	6.45875	6.67659	6.21634	6.5377	6.33068	6.81549	6.102	1.01717	1.37578	1.21234	0.853415
12687743	XM_003582659	NEO1	chr10	0.596085	0.110269	0.481235	7.29654	7.38238	7.47363	7.20529	7.37349	7.2196	7.57377	7.19098	1.0613	1.20442	1.14893	0.980359
12909436	ENSBTAT00000015469	TMLHE	chrX	0.185161	0.110299	0.800248	5.26958	5.70119	5.74887	5.2219	5.57316	4.96599	5.92458	5.4778	1.34874	1.44091	1.27582	1.42584
12829713	NM_001015515	CHID1	chr29	0.608747	0.11035	0.387828	7.04239	7.1254	7.21827	6.94952	7.24733	6.83744	7.1892	7.0616	1.05923	1.20476	0.960506	1.16809
12844800	NM_001192388	WDR3	chr3	0.4827	0.110422	0.242616	7.25541	7.12543	7.34323	7.03761	7.2985	7.21231	7.38796	6.86291	0.91385	1.23595	1.06397	0.784913
12719300	ENSBTAT00000026137	SLA2	chr13	0.897133	0.110698	0.553828	5.41503	5.3951	5.27694	5.53318	5.3328	5.49727	5.22109	5.5691	0.986278	0.837267	0.925494	1.05106
12826957	NM_001098112	EXOC8	chr28	0.560311	0.110795	0.220431	6.52648	6.4552	6.3897	6.59198	6.34893	6.70402	6.43047	6.47994	0.951798	0.869175	1.05815	0.856137
12763389	XM_593364	CYB5D2	chr19	0.225739	0.110816	0.50944	6.75551	7.03237	7.07939	6.70849	6.86682	6.6442	7.29195	6.77279	1.21156	1.29315	1.3427	1.09322
12689890	ENSBTAT00000061089	MYO1E	chr10	0.164949	0.110867	0.188354	7.3381	7.11452	7.09667	7.35595	7.1029	7.5733	7.09043	7.13861	0.856441	0.8355	0.991399	0.739855
12897578	NM_001192611	BEND3	chr9	0.705419	0.111004	0.587894	6.78391	6.85363	6.66595	6.97159	6.58099	6.98682	6.75091	6.95635	1.04952	0.809086	1.12499	0.979102
12840721	NM_001038187	ILF2	chr3	0.0418413	0.111012	0.244088	9.38935	9.60212	9.41461	9.57686	9.25008	9.52863	9.57915	9.62508	1.15891	0.893635	1.25621	1.06914
12689648	NM_001192485	RTF1	chr10	0.581214	0.11125	0.435527	9.06634	9.01152	9.12099	8.95686	9.18734	8.94533	9.05464	8.96839	0.962713	1.12049	0.912123	1.01611
12769290	NM_001109980	SLC16A3	chr19	0.0288028	0.111328	0.0765086	5.16888	5.02967	5.05044	5.14811	5.17492	5.16285	4.92597	5.13338	0.908017	0.93454	0.841509	0.979782
12895548	NM_001191213	NOL8	chr8	0.265996	0.111603	0.530503	7.4034	7.59382	7.35951	7.63771	7.21134	7.59546	7.50769	7.67996	1.1411	0.824619	1.22803	1.06032
12681574	NM_001192833	PHC3	chr1	0.45308	0.111607	0.141627	7.84334	7.73914	7.67716	7.90532	7.834	7.85267	7.52032	7.95796	0.930322	0.853725	0.804583	1.07571
12688847	NM_001034382	IVD	chr10	0.463618	0.111721	0.0982938	7.71723	7.54755	7.44221	7.82258	7.3287	8.10576	7.55571	7.5394	0.889042	0.76824	1.17041	0.675317
12864535	NM_001034225	OS9	chr5	0.787444	0.111739	0.869394	6.69049	6.7338	6.57921	6.84507	6.57075	6.81022	6.58767	6.87992	1.03047	0.8317	1.0118	1.0495
12724318	NM_176635	MYBL1	chr14	0.459337	0.111772	0.726992	5.36027	5.61284	5.20623	5.76688	5.02076	5.69977	5.3917	5.83399	1.19133	0.677999	1.29319	1.0975
12906547	NM_175795	COX7B	chrX	0.918058	0.111892	0.407533	5.77973	5.74311	6.05619	5.46666	6.22353	5.33594	5.88885	5.59738	0.974935	1.50475	0.792961	1.19867
12743329	XM_002694606	NEFH	chr17	0.0455346	0.111939	0.806792	5.34823	5.0323	5.06773	5.3128	5.20758	5.48888	4.92788	5.13673	0.803335	0.843773	0.823762	0.783415
12692002	NM_001046568	COX16	chr10	0.146502	0.112076	0.89124	8.01435	8.26455	8.00162	8.27728	7.86513	8.16357	8.1381	8.39099	1.18937	0.826069	1.20829	1.17074
12835071	NM_001076499	DOC2G	chr29	0.835464	0.112097	0.761971	4.97169	4.98961	4.90928	5.05201	4.9134	5.02997	4.90517	5.07404	1.0125	0.905809	0.994309	1.03102
12874436	NM_001076864	TMEM129	chr6	0.0643874	0.112356	0.596163	5.74004	5.56537	5.57884	5.72657	5.6424	5.83768	5.51528	5.61546	0.885971	0.902669	0.915654	0.857249
12906339	NM_001102553	NKRF	chrX	0.660284	0.112394	0.0347527	7.42525	7.34634	7.53379	7.2378	7.36999	7.4805	7.69758	6.9951	0.946777	1.22772	1.25492	0.714297
12876955	NM_001013364	CCNG1	chr7	0.100105	0.112668	0.853341	8.25444	8.5578	8.26024	8.55199	8.12489	8.38399	8.39559	8.72	1.23401	0.81691	1.2064	1.26226
12681779	ENSBTAT00000000988	AMOTL2	chr1	0.144443	0.112715	0.0169739	5.78583	5.64369	5.63704	5.79249	5.58472	5.98695	5.68935	5.59804	0.906174	0.897847	1.07522	0.763704
12849860	NM_001075427	STARD3NL	chr4	0.653415	0.112721	0.193501	6.50192	6.63164	6.32889	6.80467	6.45643	6.5474	6.20134	7.06193	1.09408	0.719078	0.837933	1.42853
12844388	NM_001038088	NASP	chr3	0.645131	0.1129	0.36557	10.1002	10.0724	10.0365	10.1361	10.0228	10.1777	10.0502	10.0945	0.980871	0.933308	1.01919	0.943996
12719630	NM_001100377	DCLRE1C	chr13	0.858538	0.113137	0.402167	5.43814	5.38705	5.17625	5.64894	5.08044	5.79584	5.27206	5.50205	0.965212	0.720616	1.14205	0.815758
12909887	NM_001205809	NKAP	chrX	0.85174	0.113288	0.386368	7.14732	7.10667	7.30625	6.94774	7.23129	7.06335	7.38121	6.83214	0.97222	1.2821	1.10951	0.851921
12724511	XM_002692551	LOC506831	chr14	0.764582	0.113622	0.0200621	5.41734	5.39221	5.47379	5.33576	5.37988	5.45479	5.56771	5.21672	0.982737	1.10041	1.13904	0.847879
12863097	XM_002687966	LOC785386	chr5	0.61403	0.113732	0.0640891	6.81492	6.99422	6.61295	7.1962	6.17663	7.45321	7.04926	6.93919	1.13234	0.667458	1.831	0.700266
12741720	---	---	chr17	0.0680721	0.113796	0.617405	5.30939	5.09972	5.29419	5.11493	5.42632	5.19247	5.16206	5.03739	0.864734	1.1323	0.832625	0.898081
12774276	ENSBTAT00000064756	LOC100337041	chr2	0.361603	0.113845	0.522172	7.51198	7.71993	7.43079	7.80112	7.25438	7.76959	7.60721	7.83265	1.15504	0.773605	1.27706	1.04468
12851480	BC116043	C4H7orf25	chr4	0.657829	0.113944	0.868096	5.6772	5.54739	5.37181	5.85279	5.46099	5.89342	5.28263	5.81215	0.913947	0.716491	0.883705	0.945224
12804108	BC111321	XPO5	chr23	0.0754344	0.114241	0.64808	8.36741	8.15746	8.1702	8.35468	8.24949	8.48533	8.09091	8.22402	0.864568	0.879967	0.895905	0.834327
12834981	NM_001099721	TMEM223	chr29	0.0784748	0.114545	0.498936	8.54898	8.78539	8.77214	8.56222	8.69744	8.40051	8.84684	8.72394	1.17806	1.15662	1.10911	1.2513
12759819	XM_002706931	LOC618289	chr18	0.716812	0.114567	0.253142	7.50054	7.57172	7.37525	7.69701	7.22539	7.77569	7.52511	7.61833	1.05057	0.800095	1.23091	0.896663
12832646	ENSBTAT00000018762	SRPR	chr29	0.137293	0.114573	0.50068	7.44957	7.64654	7.44299	7.65313	7.38788	7.51126	7.4981	7.79499	1.14629	0.864456	1.07939	1.21733
12776646	XM_002685595	STK11IP	chr2	0.211332	0.114702	0.11918	4.98704	4.81777	4.79396	5.01085	4.98562	4.98847	4.60231	5.03324	0.889291	0.860419	0.766675	1.03152
12806683	NM_001076334	SNRPC	chr23	0.107372	0.114879	0.0528857	9.51536	9.73832	9.73581	9.51787	9.76095	9.26978	9.71067	9.76597	1.16712	1.16307	0.965747	1.41049
12748981	---	---	chr18	0.972285	0.114906	0.539086	7.1127	7.12066	6.92871	7.30464	6.85397	7.37142	7.00345	7.23786	1.00553	0.770608	1.10917	0.911578
12749277	NM_173936	MIA	chr18	0.569241	0.114951	0.877307	5.746	5.91669	5.58652	6.07617	5.52421	5.96778	5.64883	6.18455	1.1256	0.712197	1.09022	1.16213
12807728	NM_001075327	SKA1	chr24	0.924817	0.114959	0.543152	9.24397	9.23392	9.32633	9.15156	9.29879	9.18915	9.35387	9.11396	0.993058	1.12879	1.03892	0.949218
12779387	ENSBTAT00000015484	PTPN18	chr2	0.138448	0.11534	0.920719	5.42704	5.67097	5.67924	5.41877	5.56518	5.2889	5.79329	5.54865	1.18422	1.19786	1.1713	1.19727
12822663	NM_001102157	MMS19	chr26	0.37729	0.115404	0.73295	6.36513	6.17605	6.09727	6.44391	6.15566	6.5746	6.03888	6.31322	0.877164	0.786415	0.92224	0.834291
12849657	NM_001192188	UBE3C	chr4	0.750219	0.115473	0.716169	6.72387	6.68231	6.59631	6.80987	6.64083	6.80691	6.55179	6.81284	0.971606	0.862405	0.940147	1.00412
12788266	NM_001098119	FCHO2	chr20	0.0401061	0.115529	0.055277	6.31881	6.75071	6.37389	6.69563	6.35778	6.27985	6.39	7.11141	1.349	0.800105	1.02259	1.77962
12789892	NM_001075579	RCN2	chr21	0.757814	0.115569	0.353062	6.73835	6.78037	6.64792	6.8708	6.69097	6.78574	6.60487	6.95586	1.02955	0.856853	0.942068	1.12516
12766560	NM_001205486	UBE2Z	chr19	0.547687	0.115694	0.861908	7.95707	7.85288	7.7639	8.04604	7.801	8.11313	7.7268	7.97896	0.930329	0.82237	0.949866	0.911194
12754174	NM_001193187	GPT2	chr18	0.821931	0.115747	0.88343	6.79242	6.75267	6.62805	6.91703	6.63499	6.94985	6.62112	6.88421	0.972821	0.818482	0.990434	0.955522
12728839	NM_001035386	CAT	chr15	0.466879	0.116015	0.458871	8.05537	8.13919	8.00384	8.19072	7.91925	8.19149	8.08843	8.18995	1.05982	0.878503	1.12442	0.998933
12828451	NM_001075991	ANXA7	chr28	0.0848567	0.116082	0.362348	5.81395	6.34792	6.32241	5.83946	6.19171	5.43619	6.45312	6.24273	1.44791	1.3976	1.19865	1.74901
12823799	NM_001075488	CCDC111	chr27	0.823045	0.116347	0.980317	5.41762	5.4726	5.24435	5.64586	5.21383	5.6214	5.27487	5.67032	1.03884	0.757068	1.04322	1.03449
12703453	XM_002691623	REXO4	chr11	0.939452	0.116397	0.125682	6.17035	6.15966	6.04998	6.28003	6.16729	6.17341	5.93268	6.38664	0.992615	0.852611	0.84991	1.15928
12783433	BC147913	UBR3	chr2	0.65773	0.116468	0.869976	6.06424	6.14593	6.25523	5.95494	6.22944	5.89904	6.28103	6.01083	1.05825	1.2314	1.03641	1.08056
12742144	NM_001034205	CLGN	chr17	0.451248	0.116469	0.547219	6.19731	6.02036	5.91868	6.29899	5.9367	6.45793	5.90067	6.14005	0.884568	0.768277	0.975335	0.802248
12877953	NM_001192098	ELL	chr7	0.475749	0.116774	0.855677	6.27058	6.16926	6.33493	6.10491	6.3984	6.14275	6.27145	6.06708	0.932185	1.17284	0.915763	0.948901
12747931	ENSBTAT00000049751	TMEM192	chr17	0.811493	0.116788	0.359148	5.19122	5.25324	5.01018	5.43429	4.85841	5.52403	5.16194	5.34455	1.04393	0.745298	1.23416	0.883023
12752079	NM_001015624	PRMT1	chr18	0.559753	0.116851	0.144242	9.43943	9.36327	9.29537	9.50733	9.43161	9.44726	9.15913	9.56741	0.948579	0.863361	0.827898	1.08685
12820347	NM_001081600	GBF1	chr26	0.156733	0.116961	0.0015555	6.71838	6.9602	6.70445	6.97413	6.27392	7.16284	7.13498	6.78541	1.18248	0.829505	1.81637	0.769809
12787369	NM_001206153	ERBB2IP	chr20	0.96137	0.117008	0.224941	7.61813	7.62403	7.5217	7.72047	7.44303	7.79323	7.60036	7.64771	1.0041	0.871293	1.11522	0.904051
12809517	NM_001143864	ELP2	chr24	0.548089	0.11705	0.177387	7.87205	7.93327	7.9853	7.82002	8.02507	7.71903	7.94552	7.92101	1.04335	1.12138	0.946353	1.15028
12768324	XM_002695655	TMEM132E	chr19	0.998418	0.117071	0.847662	5.28114	5.28129	5.21712	5.34531	5.2246	5.33768	5.20964	5.35295	1.00011	0.914976	0.989689	1.01064
12838910	DQ125496	VAV3	chr3	0.40451	0.117174	0.977122	5.55397	5.33708	5.23577	5.65528	5.34053	5.76741	5.13101	5.54314	0.860417	0.747678	0.864829	0.856028
12862155	NM_001192843	ATF7	chr5	0.0942977	0.117206	0.779735	7.40983	6.99318	7.39546	7.00755	7.57047	7.24919	7.22045	6.76592	0.749162	1.30849	0.78457	0.715351
12709483	NM_001038066	MTIF3	chr12	0.0138084	0.11722	0.228876	7.32122	6.8875	6.97447	7.23424	7.28947	7.35297	6.65948	7.11552	0.74035	0.835222	0.646181	0.848242
12708143	ENSBTAT00000031817	MYCN	chr11	0.26435	0.117259	0.172948	6.82485	6.71197	6.68762	6.8492	6.81367	6.83603	6.56158	6.86236	0.924739	0.89405	0.839681	1.01841
12813190	XM_604456	TELO2	chr25	0.496282	0.11726	0.383107	5.13298	5.08956	5.1629	5.05963	5.21257	5.05338	5.11322	5.06589	0.970351	1.0742	0.933451	1.00871
12837032	NM_001077863	ALG14	chr3	0.488768	0.117276	0.083464	8.19978	8.03465	7.92431	8.31012	7.79178	8.60777	8.05685	8.01246	0.891853	0.765353	1.20169	0.661903
12909878	NM_001101206	YIPF6	chrX	0.502906	0.117529	0.110417	6.49531	6.71185	6.86492	6.34224	6.48969	6.50093	7.24015	6.18355	1.16194	1.43662	1.68234	0.802522
12684174	NM_001075404	RSRC1	chr1	0.996433	0.11776	0.00828638	5.38339	5.38259	5.23812	5.52787	4.97466	5.79212	5.50158	5.26361	0.999449	0.818044	1.44085	0.693272
12721264	ENSBTAT00000016279 // ENSBTAT00000016279 // ENSBTAT00000016279	LOC784446 // LOC783070 // RPL5	chr13	0.0177884	0.117813	0.705796	10.1465	10.3542	10.1854	10.3154	10.0967	10.1964	10.2741	10.4343	1.15483	0.913843	1.13089	1.17927
12816574	NM_001083420	TXNDC11	chr25	0.628693	0.117836	0.543139	7.06483	7.14005	7.22853	6.97635	7.14353	6.98614	7.31354	6.96657	1.05352	1.19101	1.12507	0.986524
12824617	XM_002698724	LOC784372	chr27	0.464225	0.11786	0.205077	5.33596	5.21537	5.40856	5.14276	5.36264	5.30928	5.45449	4.97625	0.919811	1.2023	1.06574	0.793864
12746075	NM_001075358	RFC5	chr17	0.758984	0.118148	0.751832	7.75283	7.82344	7.60133	7.97493	7.60242	7.90324	7.60025	8.04663	1.05016	0.771855	0.998495	1.1045
12702132	NM_001081539	C11H2orf49	chr11	0.966102	0.118151	0.610139	7.43111	7.42551	7.32109	7.53554	7.29012	7.57211	7.35205	7.49897	0.996122	0.861874	1.04386	0.950565
12731138	ENSBTAT00000052671	ALG9	chr15	0.846849	0.118235	0.170677	6.0319	6.0784	6.25067	5.85963	6.39731	5.66649	6.10403	6.05277	1.03275	1.31134	0.816043	1.30701
12846866	NM_001083741	LRRC8D	chr3	0.514473	0.118529	0.410631	7.28577	7.16654	7.07865	7.37366	7.06271	7.50883	7.09458	7.23849	0.920676	0.815064	1.02234	0.829124
12791616	NM_174136	FURIN	chr21	0.184336	0.118539	0.519881	6.66177	6.53994	6.67327	6.52843	6.76308	6.56046	6.58347	6.49641	0.919023	1.10561	0.882943	0.956576
12840737	XM_002686363	TACSTD2	chr3	0.435189	0.11881	0.297043	6.63584	6.70295	6.73849	6.6003	6.75013	6.52155	6.72686	6.67905	1.04762	1.10053	0.984	1.11535
12793170	NM_001015645	PPP2R3C	chr21	0.0913815	0.118827	0.530327	5.8673	6.22098	6.20641	5.88187	6.09272	5.64188	6.3201	6.12187	1.27782	1.25226	1.1707	1.39474
12816615	NM_001014919	TMEM186	chr25	0.72523	0.118851	0.542735	6.70084	6.63442	6.51464	6.82061	6.49011	6.91156	6.53917	6.72967	0.955008	0.808896	1.03459	0.881547
12763019	NM_001038092	C19H17orf49	chr19	0.465298	0.118971	0.0354102	8.68353	8.78096	8.83953	8.62496	8.94044	8.42662	8.73861	8.8233	1.06986	1.16036	0.869447	1.31648
12820377	XM_003584080	TNKS2	chr26	0.972941	0.118998	0.325729	8.38556	8.38906	8.47089	8.30374	8.52058	8.25055	8.4212	8.35692	1.00243	1.12284	0.933433	1.07652
12683825	BC118477	U2SURP	chr1	0.668549	0.119283	0.360973	9.72477	9.75667	9.68053	9.8009	9.6302	9.81934	9.73087	9.78246	1.02236	0.919954	1.07227	0.974762
12691239	ENSBTAT00000048092	MGAT2	chr10	0.992362	0.119396	0.102684	5.87382	5.87164	5.68855	6.0569	5.49588	6.25175	5.88123	5.86205	0.998492	0.77467	1.30617	0.763288
12841926	NM_001099206	MCL1	chr3	0.817278	0.119548	0.162847	8.09268	8.12253	8.00311	8.2121	8.08114	8.10423	7.92509	8.31998	1.0209	0.865144	0.897476	1.16131
12706126	NM_001075792	UCK1	chr11	0.843319	0.11982	0.234663	5.60293	5.5534	5.37555	5.78078	5.24805	5.95781	5.50305	5.60374	0.966247	0.755117	1.19334	0.782372
12749577	NM_001191434	MMP15	chr18	0.56421	0.120028	0.435155	6.01531	6.07193	5.96465	6.12259	5.97483	6.05579	5.95447	6.18939	1.04003	0.896303	0.985989	1.09703
12774192	XM_002685308	LRP2	chr2	0.266908	0.120115	0.202292	9.84158	9.93459	9.82171	9.95446	9.72145	9.96171	9.92196	9.94721	1.06659	0.91209	1.1491	0.990003
12810060	ENSBTAT00000019818	MEX3C	chr24	0.865853	0.120205	0.972414	7.46061	7.43479	7.57113	7.32427	7.58668	7.33454	7.55558	7.314	0.982265	1.18662	0.978675	0.985868
12798025	NM_174475	TREX1	chr22	0.883047	0.120212	0.79616	5.34884	5.38417	5.56045	5.17256	5.57383	5.12386	5.54708	5.22126	1.02479	1.30848	0.98163	1.06984
12769861	ENSBTAT00000016263	PNPO	chr19	0.263927	0.120281	0.470263	6.49573	6.73271	6.78217	6.44627	6.73937	6.25209	6.82498	6.64045	1.17853	1.26217	1.06113	1.30891
12693536	NM_174390	MMP14	chr10	0.860457	0.120286	0.980026	5.66864	5.60019	5.32003	5.94879	5.34938	5.98789	5.29068	5.9097	0.953665	0.646733	0.960127	0.947246
12809378	NM_001101060	YES1	chr24	0.595341	0.120315	0.0295945	8.75907	8.72313	8.68669	8.79551	8.62546	8.89268	8.74791	8.69834	0.975397	0.927343	1.08859	0.873977
12682523	NM_001079791	LOC617218	chr1	0.328225	0.120316	0.126606	5.15693	5.02768	5.19746	4.98715	5.15881	5.15505	5.2361	4.81925	0.914305	1.15694	1.05503	0.792347
12705085	NM_001046046	FHL2	chr11	0.801992	0.120382	0.122174	5.51504	5.48629	5.40817	5.59317	5.33052	5.69957	5.48581	5.48677	0.980268	0.879647	1.11365	0.862863
12725587	NM_001075901	GPR172A	chr14	0.797309	0.120446	0.815617	7.29516	7.34169	7.46456	7.17229	7.42018	7.17014	7.50895	7.17443	1.03278	1.22457	1.06346	1.00298
12698515	ENSBTAT00000020020	HADHA	chr11	0.443139	0.120449	0.928237	6.99124	7.08928	6.938	7.14251	6.89469	7.08778	6.98132	7.19723	1.07032	0.867837	1.06189	1.07881
12750768	NM_001098924	USP10	chr18	0.0154387	0.120584	0.278293	8.93569	9.14188	8.97642	9.10115	8.83064	9.04075	9.1222	9.16156	1.15363	0.917174	1.22396	1.08735
12749304	NM_001001439	COX4I1	chr18	0.090913	0.120684	0.0777785	11.1552	11.2224	11.1581	11.2194	11.1597	11.1506	11.1565	11.2883	1.04771	0.958419	0.997783	1.10014
12745673	ENSBTAT00000062994	PRODH	chr17	0.0613611	0.120705	0.299773	6.04451	5.8112	6.02288	5.83283	6.20167	5.88735	5.8441	5.7783	0.850684	1.14081	0.78048	0.927202
12747853	NM_001035429	TPST2	chr17	0.720427	0.120998	0.370524	5.58183	5.64401	5.7527	5.47314	5.64297	5.52069	5.86243	5.42559	1.04404	1.21382	1.1643	0.936205
12814010	ENSBTAT00000037465	RMI2	chr25	0.717574	0.121114	0.483988	8.24956	8.20377	8.32847	8.12486	8.30681	8.19231	8.35014	8.05741	0.96876	1.15158	1.03049	0.910729
12848151	NM_001206870	HOOK1	chr3	0.0109063	0.121307	0.425826	6.89827	7.30588	6.98625	7.2179	6.84029	6.95625	7.1322	7.47956	1.32648	0.851655	1.22426	1.43724
12879465	XM_002689366	WWC1	chr7	0.96079	0.121419	0.352459	6.87912	6.87183	6.75603	6.99492	6.68974	7.0685	6.82232	6.92134	0.994957	0.847397	1.09625	0.903024
12750086	NM_001075210	PVRL2	chr18	0.843828	0.121517	0.640913	6.56565	6.61453	6.78969	6.39049	6.82328	6.30801	6.7561	6.47296	1.03446	1.31878	0.9545	1.12112
12757145	NM_001206285	PRPF31	chr18	0.93297	0.121532	0.570287	7.57904	7.56917	7.47961	7.6686	7.51804	7.64005	7.44118	7.69716	0.993178	0.877217	0.948118	1.04038
12882449	NM_001191247	ZBTB7A	chr7	0.178975	0.121568	0.413569	5.50613	5.30957	5.29352	5.52217	5.33311	5.67915	5.25394	5.36519	0.872628	0.853435	0.946606	0.804431
12681636	BC126554	TIAM1	chr1	0.416279	0.121809	0.993923	6.34756	6.22632	6.16825	6.40563	6.22944	6.46569	6.10707	6.34557	0.919395	0.848287	0.918679	0.920112
12715391	NM_001014933	CSE1L	chr13	0.162271	0.122022	0.665403	10.2351	10.3292	10.3346	10.2297	10.2734	10.1968	10.3959	10.2626	1.06743	1.07544	1.08859	1.04669
12866107	NM_001046197	EMG1	chr5	0.749547	0.122033	0.416144	9.91631	9.88987	9.83664	9.96954	9.88383	9.94879	9.78946	9.99029	0.981843	0.911999	0.936677	1.02919
12862355	NM_001195027	SNRPF	chr5	0.685203	0.122243	0.274132	6.62626	6.71745	6.49164	6.85208	6.57111	6.68141	6.41216	7.02275	1.06525	0.778925	0.895676	1.26693
12885169	NM_001105361	HDGFRP2	chr7	0.846183	0.122342	0.410327	6.33172	6.29943	6.18198	6.44918	6.12889	6.53456	6.23507	6.36379	0.977865	0.830931	1.07638	0.888368
12752899	NM_001101148	BCL2L12	chr18	0.125667	0.122472	0.226502	5.79822	6.12729	5.79671	6.1288	5.5041	6.09235	6.08932	6.16526	1.2562	0.794382	1.50027	1.05184
12887319	NM_001083747	GFRA3	chr7	0.965407	0.122569	0.419126	6.95286	6.94734	7.05229	6.84791	7.10703	6.79869	6.99754	6.89713	0.996179	1.15219	0.926915	1.07062
12688730	ENSBTAT00000015901	LOC509034	chr10	0.527498	0.122575	0.193448	8.32675	8.18925	8.43152	8.08448	8.64476	8.00873	8.21828	8.16023	0.909095	1.27195	0.744072	1.11072
12799953	NM_001206592	IFT122	chr22	0.0592546	0.12258	0.49383	5.84751	6.1009	5.87249	6.07591	5.78948	5.90553	5.95549	6.2463	1.192	0.868486	1.12195	1.26643
12903671	BT021587	CXHXorf23	chrX	0.94379	0.122698	0.811746	6.62876	6.64832	6.86117	6.41591	6.81831	6.4392	6.90403	6.39261	1.01366	1.36156	1.06122	0.968222
12750311	NM_001045971	SPINT2	chr18	0.745629	0.122729	0.81942	9.09808	9.04124	8.92936	9.20996	8.97776	9.2184	8.88096	9.20153	0.961369	0.823248	0.935104	0.988372
12828563	NM_001076041	ASCC1	chr28	0.960642	0.122864	0.70288	8.27296	8.28361	8.45132	8.10525	8.48725	8.05868	8.41539	8.15183	1.00741	1.27109	0.951413	1.0667
12885748	XM_002688582	KLF2	chr7	0.0131586	0.122973	0.0256527	5.60627	5.78847	5.75058	5.64416	5.57909	5.63344	5.92206	5.65488	1.13462	1.07655	1.26836	1.01497
12868298	NM_001206182	HELB	chr5	0.500883	0.123006	0.111144	6.51	6.64554	6.738	6.41754	6.83617	6.18383	6.63983	6.65125	1.09851	1.24872	0.872765	1.38264
12705022	NM_001034362	BET1L	chr11	0.766322	0.123013	0.428665	7.08211	7.15864	6.91428	7.32646	6.97881	7.18541	6.84976	7.46751	1.05448	0.751487	0.914432	1.21597
12714455	NM_001075331	ANKRD16	chr13	0.596531	0.123158	0.740298	5.84671	5.92599	5.76692	6.00579	5.75203	5.9414	5.78181	6.07018	1.05649	0.847409	1.02085	1.09337
12810638	NM_001046550	ENOSF1	chr24	0.189998	0.123197	0.539647	5.46458	5.66749	5.44541	5.68666	5.39041	5.53874	5.50041	5.83457	1.15102	0.846013	1.07922	1.22759
12809729	NM_001192406	CEP76	chr24	0.993906	0.123375	0.14206	6.37603	6.37756	6.53751	6.21609	6.68933	6.06273	6.38568	6.36944	1.00106	1.24956	0.810201	1.23689
12775507	BC114174	FAM46B	chr2	0.216773	0.123532	0.205283	6.39356	6.27137	6.4097	6.25523	6.53353	6.25359	6.28588	6.25686	0.918795	1.11302	0.842269	1.00227
12881814	NM_001206236	CDC34	chr7	0.0855665	0.123549	0.630709	7.46443	7.86002	7.83771	7.48675	7.58701	7.34185	8.08841	7.63164	1.31548	1.27541	1.41559	1.22246
12751064	XM_589182	PHKB	chr18	0.947743	0.123633	0.336427	6.2967	6.28167	6.1058	6.47257	6.22513	6.36826	5.98647	6.57687	0.98964	0.775517	0.847531	1.15558
12727477	ENSBTAT00000039717	SERPINH1	chr15	0.688667	0.123683	0.985291	5.52128	5.4503	5.62713	5.34445	5.66099	5.38156	5.59327	5.30733	0.951994	1.21645	0.954146	0.949847
12690764	BC111250	GPHN	chr10	0.60205	0.123797	0.517717	5.9234	6.04524	6.17036	5.79828	6.18519	5.66161	6.15553	5.93496	1.08812	1.29421	0.979651	1.20861
12889041	ENSBTAT00000007519	PLIN2	chr8	0.46314	0.12384	0.86914	9.82161	9.76196	9.85623	9.72734	9.87941	9.76381	9.83305	9.69088	0.959499	1.09345	0.968374	0.950704
12815109	NM_001014388	TPT1	chr25	0.760901	0.123846	0.534316	10.3784	10.4054	10.3211	10.4628	10.3353	10.4216	10.3069	10.504	1.0189	0.906444	0.980503	1.05879
12685821	NM_001083726	SETMAR	chr1	0.87702	0.123917	0.812007	7.86158	7.90091	8.08435	7.67814	8.03444	7.68872	8.13426	7.66757	1.02764	1.3252	1.07164	0.985447
12750333	NM_001045974	AMFR	chr18	0.452465	0.123952	0.25469	7.80484	7.65012	7.8906	7.56436	8.08664	7.52304	7.69456	7.60569	0.898308	1.25374	0.762031	1.05896
12706907	NM_001083472	ZNF512	chr11	0.640182	0.124515	0.762743	5.46142	5.54645	5.35928	5.64859	5.28936	5.63348	5.42919	5.66371	1.06071	0.81829	1.10178	1.02117
12803818	NM_001077097	B3GALT4	chr23	0.354055	0.124518	0.973498	5.36574	5.24496	5.40792	5.20277	5.46618	5.2653	5.34967	5.14025	0.919689	1.15281	0.922415	0.916971
12694530	NM_001205692	OIP5	chr10	0.126555	0.124581	0.697724	6.83135	7.03366	6.83078	7.03423	6.75444	6.90826	6.90712	7.16021	1.15054	0.868469	1.11163	1.19082
12883428	NM_175815	NDUFA2	chr7	0.934123	0.1246	0.0768779	10.4353	10.4397	10.3956	10.4794	10.4423	10.4283	10.3488	10.5305	1.00302	0.943524	0.937244	1.0734
12865137	NM_001192228	GNPTAB	chr5	0.435074	0.124615	0.532535	9.65077	9.69774	9.7218	9.62671	9.6796	9.62194	9.764	9.63149	1.0331	1.06813	1.06025	1.00664
12722339	BC112675	C14H8orf33	chr14	0.0525265	0.124654	0.176422	5.91683	6.35432	6.30485	5.9663	5.93837	5.89529	6.67134	6.0373	1.35425	1.26449	1.66206	1.10344
12743540	XM_613058	GOLGA3	chr17	0.580555	0.124792	0.654984	6.4739	6.53684	6.415	6.59574	6.35813	6.58968	6.47187	6.60181	1.04459	0.882246	1.08203	1.00844
12785958	NM_001102109	GFM2	chr20	0.832848	0.124946	0.788086	7.31671	7.34755	7.21574	7.44852	7.21997	7.41345	7.21151	7.48358	1.02161	0.850998	0.994156	1.04982
12764834	NM_001193126	SUPT6H	chr19	0.0205622	0.125122	0.139758	8.09626	8.32598	8.13879	8.28345	7.95448	8.23805	8.32309	8.32886	1.1726	0.904589	1.29112	1.06497
12746759	NM_001040531	C17H22orf39	chr17	0.199967	0.125219	0.799126	7.00832	6.4861	7.06322	6.4312	7.37487	6.64178	6.75157	6.22063	0.696299	1.54973	0.649185	0.746832
12682450	NM_001035472	CHMP2B	chr1	0.718845	0.125224	0.708522	7.62694	7.56625	7.73057	7.46262	7.79243	7.46145	7.66871	7.46379	0.958808	1.20409	0.917821	1.00163
12707367	NM_001205598	WDR43	chr11	0.00988482	0.125285	0.378675	9.09539	9.30025	9.1412	9.25444	9.00708	9.1837	9.27532	9.32517	1.15257	0.92451	1.20434	1.10303
12763919	XM_605024	PLD6	chr19	0.667033	0.125317	0.62793	5.7587	5.8518	5.97702	5.63348	5.878	5.63941	6.07604	5.62755	1.06665	1.26887	1.14714	0.991814
12706369	ENSBTAT00000008615	SOHLH1	chr11	0.0721993	0.125424	0.441807	5.65056	5.45438	5.63487	5.47008	5.77315	5.52798	5.49659	5.41218	0.872859	1.121	0.825557	0.922871
12828661	NM_001110082	RBM34	chr28	0.560112	0.125544	0.0222467	8.75055	8.83989	8.67389	8.91655	8.43925	9.06186	8.90853	8.77125	1.06388	0.845183	1.38442	0.817558
12800230	NM_001110019	VHL	chr22	0.616246	0.126029	0.576226	6.84879	6.69072	7.01936	6.52015	7.01016	6.68741	7.02855	6.35289	0.896224	1.41344	1.01282	0.793048
12804549	NM_001166297	MOCS1	chr23	0.108347	0.126313	0.979614	5.00685	4.83129	5.00232	4.83582	5.08876	4.92494	4.91588	4.74671	0.885424	1.12233	0.88707	0.883781
12896353	NM_001079786	NFYB	chr9	0.990469	0.12648	0.262319	7.59631	7.5941	7.74175	7.44866	7.63724	7.55538	7.84627	7.34194	0.998472	1.22526	1.15591	0.862477
12812212	NM_001035095	PMM2	chr25	0.126582	0.126588	0.0785792	7.28221	7.70685	7.70684	7.28221	7.74207	6.82235	7.67162	7.74208	1.34224	1.34223	0.952341	1.89176
12756674	XM_002694759	KLHDC4	chr18	0.183615	0.126639	0.261595	5.67942	5.92376	5.94324	5.65995	5.92336	5.43548	5.96311	5.88441	1.18455	1.21697	1.02794	1.36502
12899402	NM_001111261	CENPW	chr9	0.0610897	0.126728	0.173472	10.2432	9.94059	10.2129	9.97089	10.4712	10.0152	9.95458	9.92659	0.810797	1.18262	0.699026	0.940439
12882714	NM_001024567	CTH	chr7	0.0929015	0.126743	0.592955	6.0367	6.26314	6.25199	6.04785	6.17333	5.90007	6.33065	6.19563	1.16995	1.152	1.11521	1.22736
12910646	XR_084125	LOC785342	chrX	0.334098	0.127038	0.105619	5.98694	6.37737	6.49765	5.86666	5.96626	6.00763	7.02905	5.7257	1.31079	1.54863	2.08897	0.822488
12895130	NM_001038573	SMU1	chr8	0.534437	0.127049	0.166568	9.15104	9.21685	9.26735	9.10053	9.30956	8.99252	9.22515	9.20854	1.04667	1.12258	0.943173	1.16153
12765749	XM_870969	TRIM65	chr19	0.321141	0.127081	0.982363	5.07749	4.9029	4.85297	5.12742	4.94218	5.2128	4.76376	5.04204	0.886015	0.826765	0.883666	0.88837
12704900	NM_001192197	PNPT1	chr11	0.107356	0.127167	0.788274	7.75278	7.99245	7.98564	7.75959	7.84663	7.65894	8.12466	7.86024	1.18072	1.16963	1.21254	1.14973
12800012	NM_001076133	PDE12	chr22	0.441956	0.127172	0.608761	6.3451	6.18691	6.42742	6.1046	6.55889	6.13132	6.29594	6.07788	0.896147	1.25077	0.833387	0.963634
12795342	NM_001205711	SFMBT1	chr22	0.959113	0.127178	0.0571534	5.7511	5.74306	5.62284	5.87133	5.46858	6.03363	5.7771	5.70903	0.994441	0.841778	1.23843	0.798518
12708551	---	---	chr11	0.78127	0.127289	0.744763	5.95691	5.92422	6.03365	5.84748	6.03082	5.88299	6.03648	5.81197	0.9776	1.13774	1.00393	0.951962
12804005	XM_002697520	LOC787269	chr23	0.120264	0.127396	0.495176	7.77975	8.66704	8.65806	7.78873	8.4031	7.15639	8.91302	8.42107	1.84971	1.82681	1.42396	2.40274
12765647	NM_001078084	DUS1L	chr19	0.365365	0.12746	0.253201	5.33771	5.20585	5.38556	5.15801	5.53537	5.14006	5.23574	5.17596	0.912651	1.17084	0.812459	1.0252
12828220	ENSBTAT00000004143	LOC522998	chr28	0.939397	0.127599	0.927871	7.46397	7.45526	7.55023	7.36899	7.5494	7.37853	7.55107	7.35945	0.993981	1.13386	1.00115	0.986861
12881807	NM_001128505	MBD3	chr7	0.728178	0.127768	0.0314543	7.32809	7.28171	7.41023	7.19957	7.58802	7.06816	7.23243	7.33098	0.968358	1.15721	0.781551	1.19982
12801335	NM_001034242	ECI2	chr23	0.425289	0.12787	0.333963	5.60584	5.74953	5.53668	5.8187	5.37735	5.83434	5.69601	5.80306	1.10473	0.822436	1.24717	0.978553
12740719	NM_001080309	YOD1	chr16	0.800937	0.127924	0.349955	5.6718	5.73738	5.49925	5.90993	5.34332	6.00029	5.65518	5.81958	1.0465	0.752268	1.2413	0.88227
12895648	NM_001079800	C8H9orf100	chr8	0.384969	0.12853	0.117765	6.39185	6.24185	6.18226	6.45143	6.11845	6.66526	6.24608	6.23761	0.901247	0.829797	1.0925	0.743475
12829236	NR_031336	MIR584-7	chr29	0.394309	0.128621	0.487753	5.25018	5.09529	5.3145	5.03096	5.32911	5.17125	5.2999	4.89067	0.898196	1.21718	0.979952	0.82326
12812789	NM_001193202	ORAI3	chr25	0.990373	0.128635	0.938043	5.15107	5.15279	5.26409	5.03977	5.26876	5.03338	5.25942	5.04615	1.00119	1.16823	0.993548	1.00889
12720165	---	---	chr13	0.869855	0.128663	0.331382	7.01244	7.041	7.16414	6.88931	7.23577	6.78912	7.0925	6.9895	1.01999	1.20985	0.905466	1.149
12852048	ENSBTAT00000043967	LRRC61	chr4	0.795527	0.12873	0.7943	5.19835	5.1527	5.03678	5.31427	5.03664	5.36005	5.03692	5.26848	0.968857	0.825026	1.00019	0.938501
12732358	ENSBTAT00000001630	MPZL3	chr15	0.968801	0.128826	0.00807094	6.44558	6.45269	6.30585	6.59242	6.57282	6.31834	6.03887	6.8665	1.00494	0.819849	0.690663	1.46222
12704851	NM_001035062	KRTCAP3	chr11	0.596693	0.128963	0.919795	7.0435	7.11833	7.19186	6.96997	7.16153	6.92547	7.22218	7.01448	1.05324	1.16626	1.04294	1.06364
12682860	NM_001105035	ACTL6A	chr1	0.859035	0.129025	0.51389	8.4795	8.50033	8.58226	8.39757	8.53333	8.42568	8.6312	8.36946	1.01454	1.13658	1.07019	0.961787
12781302	NM_001101942	ORC2	chr2	0.382789	0.12909	0.481416	5.18996	5.3715	5.11887	5.44259	4.95519	5.42473	5.28255	5.46045	1.13409	0.799007	1.25471	1.02507
12876389	XM_003582431	PCBD2	chr7	0.790165	0.129159	0.120858	7.57086	7.46612	7.20884	7.82814	7.57829	7.56343	6.83939	8.09285	0.929975	0.650987	0.5992	1.44335
12731267	NM_001037446	CD59	chr15	0.344208	0.129165	0.207552	8.50352	8.3017	8.56825	8.23697	8.80515	8.2019	8.33136	8.27204	0.869451	1.25813	0.720073	1.04982
12859281	NM_001014914	TMBIM4	chr5	0.468547	0.129169	0.161694	10.4743	10.5166	10.4499	10.541	10.387	10.5616	10.5128	10.5203	1.02972	0.938841	1.09107	0.971818
12700657	XM_002691316	FOXN2	chr11	0.36707	0.129253	0.375944	7.55419	7.73406	7.7991	7.48915	7.62093	7.48746	7.97727	7.49085	1.13278	1.23966	1.28018	1.00235
12759936	ENSBTAT00000027247	VSIG10L	chr18	0.0710538	0.129314	0.365229	5.27633	5.05235	5.25697	5.07171	5.42293	5.12973	5.091	5.0137	0.8562	1.13702	0.794473	0.922722
12746842	NM_001192483	ZNF280A	chr17	0.75065	0.129326	0.884365	7.79797	7.71669	7.95836	7.5563	7.98043	7.61552	7.9363	7.49708	0.945217	1.3214	0.969875	0.921186
12763087	NM_001075611	TOM1L1	chr19	0.168384	0.129387	0.414199	5.7048	5.98856	5.68944	6.00392	5.46513	5.94448	5.91376	6.06336	1.21736	0.804142	1.36475	1.08589
12820727	NM_001105424	HHEX	chr26	0.820054	0.129505	0.701555	5.50226	5.54603	5.3729	5.67539	5.3141	5.69043	5.4317	5.66036	1.0308	0.810849	1.08493	0.979369
12813277	NM_001205948	GLIS2	chr25	0.866416	0.129542	0.648507	5.06445	5.03634	4.91895	5.18184	4.8948	5.23411	4.9431	5.12958	0.980699	0.833413	1.03404	0.930107
12813471	NM_001017945	DTX2	chr25	0.541575	0.129707	0.940044	5.47372	5.5717	5.39724	5.64818	5.35425	5.59319	5.44023	5.70317	1.07027	0.840351	1.06141	1.07921
12827895	NM_001014860	HNRNPF	chr28	0.204793	0.129937	0.34199	10.4182	10.3536	10.3469	10.4249	10.3553	10.4812	10.3386	10.3687	0.956216	0.947364	0.988465	0.92502
12853733	NM_001075384	ANKMY2	chr4	0.0387192	0.130046	0.183741	6.52511	6.94264	6.58592	6.88183	6.24836	6.80186	6.92349	6.96179	1.33564	0.814562	1.59674	1.11723
12763562	---	---	chr19	0.0960626	0.130093	0.254519	5.02689	4.73649	5.01272	4.75066	5.25497	4.79881	4.77048	4.7025	0.817675	1.19919	0.714748	0.935423
12897367	NM_001075776	OSTM1	chr9	0.546707	0.130209	0.494035	6.08133	6.25394	6.39122	5.94405	6.20682	5.95584	6.57561	5.93226	1.12709	1.36336	1.29127	0.983785
12872717	NM_001081621	TIFA	chr6	0.398058	0.130229	0.768549	5.36199	5.23142	5.17677	5.41664	5.21955	5.50443	5.13398	5.32885	0.91347	0.84682	0.942418	0.885411
12906018	ENSBTAT00000048804	LOC781580	chrX	0.756134	0.130336	0.418351	10.0272	10.0601	10.1266	9.96069	10.0669	9.98746	10.1862	9.93391	1.02304	1.12186	1.0862	0.963561
12885735	ENSBTAT00000036173	CDC37	chr7	0.577504	0.130457	0.16337	9.36593	9.29002	9.22156	9.43439	9.16199	9.56988	9.28113	9.29891	0.94874	0.862842	1.08609	0.828763
12840918	NM_001024572	MEAF6	chr3	0.503603	0.130528	0.454135	8.30584	8.1843	8.38663	8.10351	8.51554	8.09614	8.25772	8.11088	0.919202	1.21682	0.836347	1.01026
12817072	ENSBTAT00000007391	LITAF	chr25	0.164844	0.130658	0.238795	9.54585	9.77612	9.78702	9.53496	9.76867	9.32303	9.80536	9.74689	1.17306	1.1909	1.02576	1.34151
12718907	NM_001100331	PDSS1	chr13	0.616342	0.130708	0.788328	6.8168	6.99178	6.63154	7.17705	6.4973	7.13631	6.76577	7.21779	1.12895	0.685146	1.20453	1.05811
12761367	NM_205816	RPS6KB1	chr19	0.310367	0.130736	0.922444	8.14809	8.28911	8.11139	8.32581	8.04753	8.24864	8.17524	8.40298	1.10269	0.861892	1.09256	1.11291
12686432	NM_001076921	IGSF11	chr1	0.553578	0.130831	0.621574	5.25907	5.07904	5.40594	4.93216	5.42108	5.09705	5.3908	4.76727	0.882685	1.38874	0.979231	0.795658
12868130	XM_612859	PRDM4	chr5	0.0187257	0.130848	0.00531723	6.75992	6.31734	6.67334	6.40392	6.622	6.89784	6.72468	5.91	0.735816	1.20533	1.07376	0.504232
12889879	ENSBTAT00000004593	TLE4	chr8	0.562601	0.131349	0.994589	6.81936	6.87783	6.92722	6.76996	6.89833	6.74038	6.95612	6.79954	1.04136	1.11517	1.04087	1.04185
12710096	NM_001077990	LHFP	chr12	0.223725	0.131443	0.0252586	5.43338	5.64991	5.67762	5.40566	5.35828	5.50847	5.99697	5.30285	1.16194	1.20745	1.55691	0.867163
12818899	NM_174295	SMC3	chr26	0.177514	0.131579	0.36775	9.03253	9.15184	9.02497	9.15939	8.92612	9.13894	9.12383	9.17985	1.08622	0.911037	1.14688	1.02876
12897798	---	---	chr9	0.763909	0.131924	0.612895	6.19636	6.25652	6.38276	6.07012	6.40349	5.98924	6.36204	6.15101	1.04258	1.24198	0.971677	1.11866
12686304	NM_001034678	HES1	chr1	0.916195	0.13285	0.42592	8.033	8.05249	8.18706	7.89844	8.25177	7.81424	8.12234	7.98263	1.0136	1.22147	0.914198	1.1238
12737211	NM_001206816	NR5A2	chr16	0.619305	0.132875	0.985579	5.99502	5.89295	5.78447	6.1035	5.83736	6.15269	5.73159	6.05431	0.931691	0.801611	0.929305	0.934083
12878698	NM_001099369	DNM2	chr7	0.838492	0.133052	0.275957	8.05276	8.07145	7.99074	8.13347	8.03226	8.07327	7.94923	8.19366	1.01303	0.90581	0.94407	1.08703
12782389	NM_001077968	TMEM185B	chr2	0.504096	0.133071	0.217542	5.84536	5.96315	6.04064	5.76788	5.87113	5.8196	6.21015	5.71616	1.08507	1.20811	1.2649	0.93081
12871206	NM_001075771	PARM1	chr6	0.410029	0.133097	0.72094	8.10159	7.9548	8.16549	7.8909	8.20734	7.99584	8.12363	7.78596	0.903256	1.20965	0.943629	0.86461
12750702	NM_001098920	TRAPPC2L	chr18	0.917615	0.13322	0.698019	8.20362	8.22899	8.02534	8.40727	7.96497	8.44228	8.08572	8.37227	1.01774	0.767409	1.0873	0.952633
12704484	ENSBTAT00000056731	MRPL41	chr11	0.346536	0.133441	0.190069	10.138	10.0429	10.1679	10.0129	10.2826	9.99338	10.0533	10.0325	0.936209	1.11343	0.853062	1.02746
12753700	NM_001083769	IRF8	chr18	0.417357	0.133701	0.824594	5.2876	5.43012	5.49408	5.22364	5.40354	5.17167	5.58462	5.27561	1.10383	1.20618	1.13373	1.07471
12896926	NM_001038509	C9H6orf72	chr9	0.60444	0.133712	0.384229	7.32585	7.43057	7.22168	7.53474	7.08067	7.57102	7.36268	7.49845	1.07529	0.804931	1.21589	0.950942
12758079	ENSBTAT00000015528	LENG9	chr18	0.138271	0.133774	0.908888	5.17683	5.02323	5.17778	5.02228	5.2603	5.09335	5.09526	4.9512	0.899006	1.11381	0.891901	0.906167
12694611	NM_001205727	PKM	chr10	0.196291	0.133798	0.178776	7.6263	7.86232	7.60608	7.88253	7.61114	7.64145	7.60102	8.12361	1.17774	0.825619	0.993014	1.39683
12861319	ENSBTAT00000031418	CAPRIN2	chr5	0.233716	0.133799	0.226988	5.01711	5.30572	5.34558	4.97725	5.05477	4.97944	5.63639	4.97505	1.22147	1.29086	1.49653	0.996959
12800670	ENSBTAT00000015450 // ENSBTAT00000015450	LOC783221 // CHCHD5	chr22	0.804079	0.133886	0.294585	8.9476	8.89032	8.73965	9.09827	8.89134	9.00386	8.58795	9.19268	0.961072	0.779909	0.810346	1.13983
12910382	NM_001077106	MGC140080	chrX	0.990899	0.134177	0.167829	5.1854	5.18638	5.11955	5.25224	5.05831	5.3125	5.18078	5.19197	1.00068	0.912128	1.0886	0.919851
12842793	NM_174585	PRKACB	chr3	0.248516	0.13462	0.456706	5.18497	4.79326	4.7314	5.24683	5.05199	5.31794	4.41081	5.17572	0.76223	0.699587	0.641188	0.906122
12793663	NM_001076304	C21H15orf38	chr21	0.657754	0.134715	0.297534	5.1144	5.22561	5.36408	4.97593	5.44112	4.78767	5.28704	5.16418	1.08014	1.30872	0.898703	1.2982
12775041	ENSBTAT00000008419	BMPR2	chr2	0.807731	0.13476	0.572016	6.44217	6.38931	6.24748	6.584	6.33553	6.54881	6.15943	6.6192	0.964026	0.791949	0.88509	1.05
12831635	NM_001205738	SPTY2D1	chr29	0.220592	0.134761	0.160118	7.50697	7.69757	7.48451	7.72003	7.27908	7.73486	7.68993	7.7052	1.14124	0.849375	1.32947	0.979653
12778967	XM_613036	SP3	chr2	0.76314	0.134762	0.263981	8.11348	8.17008	7.99634	8.28721	7.86116	8.36579	8.13153	8.20863	1.04001	0.81741	1.20612	0.896787
12686768	ENSBTAT00000008696 // ENSBTAT00000008696	LOC100335532 // HMGN1	chr1	0.892499	0.134851	0.503443	10.8624	10.8807	10.7668	10.9763	10.7121	11.0128	10.8214	10.9399	1.01275	0.864788	1.07876	0.950776
12880413	NM_001035391	RAB11B	chr7	0.0840415	0.135163	0.402623	6.85863	7.24397	7.21586	6.88674	7.1131	6.60416	7.31861	7.16932	1.30616	1.25624	1.15309	1.47955
12838861	NM_001034540	PEX19	chr3	0.998862	0.135182	0.501393	8.49796	8.4977	8.63588	8.35977	8.69636	8.29955	8.5754	8.42	0.999824	1.21092	0.919575	1.08708
12688744	NM_001080247	JKAMP	chr10	0.856578	0.135454	0.0805	7.20765	7.17005	7.34975	7.02794	7.55951	6.85578	7.14	7.2001	0.974278	1.2499	0.747681	1.26955
12889108	NM_174286	CREB3	chr8	0.203318	0.135526	0.371872	5.23918	4.94482	4.91758	5.26642	4.96282	5.51555	4.87234	5.0173	0.815434	0.785213	0.939214	0.707967
12844877	NM_001035306	RPL5	chr3	0.118829	0.135679	0.918105	10.6805	10.806	10.6834	10.8031	10.6246	10.7363	10.7422	10.8698	1.09092	0.920383	1.08492	1.09695
12777765	NM_001075989	KIAA1715	chr2	0.473863	0.135717	0.457543	5.71769	5.8736	5.96262	5.62867	5.96558	5.46981	5.95966	5.78754	1.11412	1.26046	0.995911	1.24636
12880178	NM_001046288	KIF20A	chr7	0.8567	0.135889	0.863832	10.021	10.0325	9.97768	10.0758	9.9665	10.0755	9.98887	10.0761	1.00798	0.934228	1.01562	1.0004
12765398	NM_001098137	PRR11	chr19	0.43163	0.136216	0.591191	7.4072	7.61354	7.30973	7.71101	7.27665	7.53775	7.34281	7.88427	1.15376	0.757184	1.04692	1.27149
12723427	NM_001099126	TMEM70	chr14	0.919	0.136512	0.448677	7.19789	7.17515	7.01398	7.35906	6.93987	7.45591	7.08809	7.26221	0.984361	0.787262	1.1082	0.874358
12777082	NM_001083446	ASAP3	chr2	0.375739	0.136618	0.135295	5.54594	5.4287	5.38649	5.58815	5.34392	5.74796	5.42907	5.42834	0.921953	0.869553	1.0608	0.80128
12806778	XM_868885	LOC616776	chr23	0.303912	0.136797	0.487399	10.8653	10.9847	11.0131	10.837	10.9933	10.7373	11.0328	10.9366	1.08629	1.12982	1.02775	1.14815
12885162	NM_001015583	DDA1	chr7	0.476722	0.137007	0.573324	8.74137	8.56926	8.47043	8.8402	8.62438	8.85836	8.31648	8.82204	0.887546	0.773907	0.807817	0.975144
12884383	NM_001038061	UIMC1	chr7	0.349196	0.137189	0.312798	5.80426	5.63261	5.57918	5.8577	5.75776	5.85077	5.4006	5.86462	0.887826	0.824438	0.780703	1.00965
12722265	---	---	chr14	0.533102	0.137204	0.9275	5.00064	4.81995	5.13221	4.68838	5.20945	4.79184	5.05497	4.58493	0.882279	1.36021	0.898459	0.86639
12759184	NM_001034774	TPPP3	chr18	0.268403	0.137243	0.58781	5.91111	5.66232	5.95645	5.61698	6.02083	5.80138	5.89207	5.43258	0.841606	1.26529	0.914614	0.774426
12804273	NR_031300	MIR2378	chr23	0.134285	0.137337	0.309381	5.13888	5.02663	5.0271	5.13841	5.12058	5.15717	4.93363	5.11964	0.925149	0.925749	0.878461	0.974319
12759721	NM_001192487	NAPA	chr18	0.944824	0.1374	0.0920507	5.68047	5.70035	5.91153	5.46929	6.15497	5.20598	5.66809	5.73261	1.01388	1.35871	0.713568	1.44057
12793027	ENSBTAT00000013450	LYSMD4	chr21	0.313764	0.137449	0.999708	6.26144	5.83474	6.36884	5.72733	6.58227	5.9406	6.15542	5.51405	0.743961	1.55997	0.743883	0.74404
12690173	NM_001192665	RAB2B	chr10	0.549538	0.137546	0.780609	5.06983	4.89736	4.7631	5.20409	4.80938	5.33028	4.71682	5.0779	0.887324	0.736627	0.937857	0.839515
12910070	NM_001035440	SH3BGRL	chrX	0.623417	0.138107	0.701796	6.72667	6.93981	7.16547	6.50101	6.97593	6.47742	7.35502	6.5246	1.1592	1.58498	1.30052	1.03324
12761076	NM_001206313	POLR2A	chr19	0.554827	0.138171	0.179862	8.05462	7.97263	7.90755	8.11969	8.04387	8.06536	7.77124	8.17402	0.944751	0.863259	0.827804	1.07822
12709269	ENSBTAT00000021981	SLC25A30	chr12	0.0870237	0.138192	0.694944	6.35764	6.84242	6.39255	6.8075	6.09707	6.6182	6.68803	6.9968	1.39937	0.750043	1.50624	1.30008
12752439	NM_001102100	LENG8	chr18	0.437055	0.138291	0.736927	6.51851	6.64215	6.70133	6.45934	6.613	6.42403	6.78966	6.49465	1.08948	1.18263	1.13027	1.05017
12712068	XM_002691801	CCNA1	chr12	0.786771	0.138374	0.384389	7.08134	7.01957	6.87534	7.22558	7.00663	7.15605	6.74404	7.2951	0.958089	0.784454	0.833589	1.10118
12756849	NM_001046069	LCAT	chr18	0.517947	0.138398	0.99196	7.81644	7.66858	7.91693	7.56809	7.992	7.64088	7.84185	7.49531	0.902586	1.27353	0.901155	0.90402
12817551	ENSBTAT00000044774	LOC528828	chr25	0.528712	0.138472	0.411104	8.18098	7.99186	8.31539	7.85745	8.53388	7.82808	8.0969	7.88683	0.877142	1.37357	0.738679	1.04156
12788191	NM_001205812	MARCH6	chr20	0.450168	0.138486	0.280444	7.34452	7.47411	7.27879	7.53984	7.12048	7.56855	7.4371	7.51113	1.09399	0.834478	1.24541	0.960976
12834674	NM_001040560	ZNHIT2	chr29	0.260735	0.138518	0.662273	6.42145	6.20798	6.45744	6.17199	6.52344	6.31945	6.39145	6.02452	0.862466	1.2188	0.912574	0.815109
12759917	NM_001101299	GYS1	chr18	0.167166	0.138546	0.706832	5.66017	6.04028	6.05497	5.64548	5.91521	5.40514	6.19474	5.88582	1.30143	1.32822	1.2138	1.3954
12848889	NM_174168	NPVF	chr4	0.906746	0.138552	0.551087	5.22379	5.264	4.98052	5.50726	4.85754	5.59004	5.10351	5.42449	1.02826	0.694121	1.18589	0.891592
12903130	NM_001102481	CASK	chrX	0.171389	0.138633	0.515232	6.78816	6.48519	6.80156	6.47179	6.88265	6.69367	6.72047	6.2499	0.810581	1.25681	0.893675	0.735213
12906200	---	---	chrX	0.164062	0.139039	0.247866	5.66142	5.35284	5.67184	5.34243	5.69926	5.62359	5.64443	5.06126	0.807436	1.25651	0.962707	0.677209
12696239	NM_001193231	DPP8	chr10	0.551562	0.139069	0.726124	5.78654	5.95168	5.65777	6.08046	5.52681	6.04628	5.78874	6.11463	1.12128	0.746035	1.19908	1.04852
12734644	NM_001172594	ATP2B4	chr16	0.492332	0.139392	0.643783	5.37036	5.27938	5.42557	5.22418	5.50157	5.23916	5.34957	5.2092	0.938884	1.1498	0.900001	0.979447
12801704	ENSBTAT00000064395	LOC511316	chr23	0.186151	0.139424	0.210659	5.19879	5.5711	5.59454	5.17534	5.23265	5.16492	5.95644	5.18576	1.29443	1.33719	1.65152	1.01455
12875517	NM_001083754	RCHY1	chr6	0.709499	0.139446	0.0253524	8.15908	8.20479	8.27567	8.08821	8.40142	7.91675	8.14991	8.25967	1.03219	1.13875	0.840018	1.26833
12751687	NM_001100366	CYP2S1	chr18	0.344355	0.139611	0.90523	8.26437	8.41332	8.45766	8.22003	8.37394	8.1548	8.54137	8.28526	1.10876	1.17905	1.12306	1.09464
12812600	NM_001034482	CDIPT	chr25	0.242737	0.139657	0.532555	8.20314	7.95189	8.2385	7.91653	8.43019	7.97609	8.0468	7.85697	0.840164	1.25003	0.766632	0.920748
12798335	NM_001034224	CNBP	chr22	0.508694	0.139726	0.0155998	9.68932	9.76474	9.81373	9.64033	9.92695	9.45168	9.70051	9.82898	1.05367	1.12772	0.854743	1.2989
12867933	NM_001205756	PHC1	chr5	0.434883	0.139949	0.844657	7.20224	7.08402	7.02852	7.25774	7.07293	7.33154	6.98411	7.18394	0.921328	0.853094	0.94029	0.902747
12899625	NM_001206497	COL12A1	chr9	0.994311	0.140022	0.592427	7.54943	7.5486	7.63794	7.46008	7.66964	7.42921	7.60624	7.49095	0.999425	1.13121	0.957007	1.04372
12810703	BC111618	ZNF271	chr24	0.192089	0.140235	0.0641213	4.98775	5.20351	4.9727	5.21856	5.02235	4.95316	4.92306	5.48396	1.16132	0.843314	0.933493	1.44474
12693035	---	---	chr10	0.19255	0.140285	0.145049	6.59372	6.4748	6.60208	6.46644	6.7285	6.45894	6.47566	6.47394	0.920878	1.09858	0.839246	1.01045
12906051	NM_001102530	ERCC6L	chrX	0.946881	0.140339	0.536993	8.06934	8.05873	8.18569	7.94239	8.24046	7.89823	8.13091	7.98655	0.992671	1.18369	0.926875	1.06314
12895966	NM_001130762	ELP3	chr8	0.582875	0.140414	0.00265816	7.06071	7.01378	7.10217	6.97232	6.97698	7.14443	7.22736	6.80021	0.967999	1.09418	1.18952	0.787734
12907962	NM_001075504	NLGN3	chrX	0.588153	0.140622	0.186506	5.25878	5.17134	5.3377	5.09242	5.27223	5.24532	5.40317	4.93951	0.941194	1.18533	1.095	0.808989
12845010	NM_001192471	AGL	chr3	0.257847	0.140709	0.0829569	5.4326	5.62674	5.40144	5.6579	5.45738	5.40782	5.3455	5.90799	1.14404	0.837137	0.925383	1.41437
12760764	NM_177504	NMT1	chr19	0.500195	0.140726	0.908927	9.15043	9.2165	9.25769	9.10925	9.21909	9.08178	9.29629	9.13672	1.04686	1.10837	1.05497	1.03881
12864953	NM_001205625	KDM5A	chr5	0.726655	0.140729	0.681893	7.61391	7.5791	7.52069	7.67232	7.51767	7.71014	7.5237	7.63449	0.976162	0.900232	1.00419	0.948914
12865481	ENSBTAT00000027044	C5H12orf57	chr5	0.789754	0.140748	0.493833	10.2732	10.2998	10.3624	10.2106	10.3835	10.163	10.3414	10.2582	1.01859	1.111	0.971275	1.0682
12862620	XM_002687776	DUSP16	chr5	0.0648767	0.140929	0.578053	6.85772	6.42804	6.81076	6.47501	7.08713	6.62832	6.53438	6.32171	0.742427	1.26203	0.681721	0.808539
12818560	NM_001191169	DEXI	chr25	0.33245	0.141042	0.618254	5.55845	5.66496	5.69421	5.52919	5.66804	5.44886	5.72039	5.60952	1.07662	1.12119	1.03695	1.1178
12733407	NM_001046531	BACE1	chr15	0.418038	0.141144	0.243097	5.24097	5.35078	5.39812	5.19363	5.42327	5.05868	5.37298	5.32858	1.07908	1.15228	0.965742	1.20573
12724704	NM_001205657	DSCC1	chr14	0.59048	0.141145	0.743319	6.90496	7.0116	6.80797	7.10859	6.7223	7.08762	6.89364	7.12956	1.07672	0.811905	1.1261	1.0295
12680597	NM_001206047	PIK3CB	chr1	0.561964	0.14136	0.0409625	9.24623	9.20064	9.16388	9.28299	9.1011	9.39137	9.22666	9.17462	0.96889	0.920751	1.09093	0.860502
12745391	ENSBTAT00000018572	PI4KA	chr17	0.968071	0.141759	0.396673	5.53681	5.54272	5.42759	5.65195	5.48785	5.58578	5.36732	5.71811	1.0041	0.855974	0.919852	1.09606
12695469	NM_001046276	DNAJC17	chr10	0.378456	0.142149	0.754734	7.55915	7.39791	7.34112	7.61593	7.39345	7.72484	7.28879	7.50703	0.894259	0.826558	0.93002	0.859873
12701509	NM_001046384	COMMD1	chr11	0.834327	0.142381	0.972919	10.2769	10.2549	10.3456	10.1862	10.3548	10.199	10.3364	10.1735	0.984892	1.11682	0.987327	0.982463
12900212	NM_001080273	TRMT11	chr9	0.0763578	0.142486	0.278698	5.03377	5.49637	5.07675	5.45339	4.98234	5.08519	5.17116	5.82158	1.37803	0.770233	1.13983	1.666
12850935	NM_001144104	CASP2	chr4	0.974245	0.142637	0.0588587	7.57691	7.58384	7.74326	7.41749	7.95468	7.19915	7.53184	7.63584	1.00481	1.25333	0.745957	1.3535
12776414	NM_001075617	IMP4	chr2	0.0208248	0.142638	0.0560476	7.87087	8.18782	7.93402	8.12466	7.64819	8.09354	8.21985	8.15579	1.2457	0.876216	1.48623	1.0441
12829175	NM_001242346	HRAS	chr29	0.46861	0.142665	0.581354	6.72165	6.82236	6.66743	6.87658	6.57891	6.8644	6.75596	6.88876	1.0723	0.86505	1.13057	1.01703
12826638	ENSBTAT00000028551	FAM213A	chr28	0.406852	0.142734	0.834729	6.81273	6.70949	6.6677	6.85452	6.70647	6.919	6.62893	6.79005	0.930938	0.878539	0.947672	0.914501
12794888	NM_001035049	SHQ1	chr22	0.15741	0.142848	0.141037	6.57136	6.9331	6.56432	6.94014	6.19463	6.94809	6.93402	6.93218	1.28498	0.770671	1.66947	0.989038
12904677	ENSBTAT00000064453	LOC528092	chrX	0.888074	0.142855	0.74832	5.08489	5.10411	5.19802	4.99098	5.16649	5.0033	5.22956	4.97865	1.01341	1.15432	1.04469	0.983062
12894451	ENSBTAT00000061167	ENTPD4	chr8	0.253109	0.143099	0.42082	7.80029	8.03414	8.0691	7.76533	7.87069	7.72989	8.26752	7.80077	1.17597	1.23437	1.31662	1.05035
12853503	ENSBTAT00000061045	SRPK2	chr4	0.484787	0.143124	0.0352813	6.47055	6.56133	6.41821	6.61367	6.22687	6.71422	6.60954	6.51312	1.06495	0.873291	1.30375	0.869889
12814637	NM_001083798	STX1A	chr25	0.692336	0.143166	0.514878	6.31641	6.23093	6.11033	6.43701	6.08242	6.55041	6.13824	6.32361	0.942466	0.79737	1.03945	0.85453
12759352	XM_869233	ZDHHC7	chr18	0.366923	0.143266	0.462126	6.43616	6.19451	6.11503	6.51564	6.3339	6.53843	5.89615	6.49286	0.845774	0.757535	0.738289	0.968907
12812007	ENSBTAT00000022073	PIGQ	chr25	0.515968	0.143269	0.0127756	6.4492	6.33753	6.52274	6.26398	6.81413	6.08426	6.23136	6.4437	0.925517	1.19645	0.667678	1.28293
12816811	NM_001083436	GUSB	chr25	0.701733	0.143302	0.353702	8.2025	8.27449	8.38058	8.09641	8.43276	7.97225	8.3284	8.22058	1.05116	1.2177	0.930221	1.18783
12880728	NM_001046416	AP3S1	chr7	0.427652	0.143402	0.709413	6.56325	6.68277	6.51003	6.73599	6.47812	6.64838	6.54193	6.8236	1.08637	0.855024	1.04522	1.12914
12745448	NM_174581	PPP1CC	chr17	0.783445	0.143436	0.970047	9.45555	9.4371	9.39555	9.4971	9.40603	9.50506	9.38507	9.48913	0.987295	0.93203	0.985574	0.989019
12751977	NM_001075778	GPATCH1	chr18	0.499497	0.143439	0.628469	5.5977	5.48751	5.66529	5.41993	5.68104	5.51436	5.64953	5.3255	0.926469	1.18539	0.978395	0.8773
12754033	NM_001034804	LENG1	chr18	0.0971581	0.143548	0.458747	6.81188	6.56763	6.79637	6.58314	6.86587	6.75789	6.72686	6.40839	0.844251	1.15928	0.908144	0.784853
12843181	NM_001193130	CEPT1	chr3	0.322764	0.143922	0.974851	8.38365	8.51277	8.35098	8.54544	8.28439	8.4829	8.41756	8.60797	1.09362	0.873902	1.0967	1.09056
12787903	NM_001034595	CCT5	chr20	0.87867	0.144142	0.788949	10.3542	10.3641	10.3103	10.408	10.2967	10.4118	10.3239	10.4043	1.00686	0.93451	1.01903	0.994849
12697850	XM_002690810	ZFP106	chr10	0.964577	0.14448	0.198006	8.81285	8.81721	8.7409	8.88917	8.80361	8.8221	8.67819	8.95624	1.00303	0.902331	0.916735	1.09744
12892785	NM_174599	SLC1A1	chr8	0.692949	0.144546	0.795102	9.78889	9.83069	9.88953	9.73005	9.88236	9.69543	9.8967	9.76468	1.0294	1.11688	1.00999	1.04917
12855853	NM_001105443	ZNRF2	chr4	0.229876	0.144568	0.845908	7.58942	7.84566	7.5601	7.87498	7.41171	7.76713	7.70849	7.98282	1.19436	0.803918	1.2284	1.16126
12826125	NM_001083658	TIMM23	chr28	0.443793	0.144587	0.950551	9.50215	9.43205	9.53557	9.39863	9.56781	9.43649	9.50333	9.36076	0.952571	1.09957	0.956291	0.948865
12748410	NM_001191219	GGT5	chr17	0.948321	0.144835	0.094666	5.56214	5.56956	5.47948	5.65222	5.37567	5.7486	5.58328	5.55583	1.00516	0.887155	1.15478	0.874922
12881358	NM_001081540	RNF14	chr7	0.24393	0.144861	0.570042	7.60479	7.4264	7.6286	7.40259	7.67504	7.53454	7.58216	7.27065	0.883694	1.16959	0.937654	0.832839
12773136	XM_002696168	FAM100B	chr19	0.238466	0.144967	0.00448061	6.88211	7.05506	6.86038	7.0768	7.00722	6.757	6.71353	7.39659	1.12736	0.860699	0.815809	1.55789
12796354	NM_001046358	CMTM8	chr22	0.912229	0.145235	0.249459	8.36475	8.37981	8.47521	8.26935	8.54801	8.18149	8.4024	8.35721	1.01049	1.15337	0.903997	1.12953
12765308	NM_001193043	HEXIM2	chr19	0.560395	0.145425	0.506808	5.45595	5.60174	5.34124	5.71645	5.35159	5.56032	5.33089	5.87258	1.10633	0.770992	0.985759	1.24165
12772371	NM_001024570	PHF23	chr19	0.15967	0.145542	0.730135	6.99438	6.78003	6.77602	6.9984	6.85769	7.13108	6.69435	6.86571	0.861933	0.857152	0.892961	0.831983
12741819	XM_003587159	NCOR2	chr17	0.72683	0.14559	0.420221	5.09833	5.11949	5.15444	5.06338	5.16848	5.02818	5.1404	5.09858	1.01478	1.06515	0.980724	1.05001
12795511	ENSBTAT00000019665	LOC514296	chr22	0.164814	0.145866	0.656379	5.55372	5.90262	5.54497	5.91137	5.31619	5.79125	5.77375	6.03148	1.27359	0.77572	1.37321	1.18119
12899908	NM_001035063	IFNGR1	chr9	0.666614	0.145975	0.907187	5.46977	5.55294	5.65615	5.36655	5.60335	5.33619	5.70896	5.39691	1.05934	1.22231	1.07595	1.04299
12694599	NM_001101951	NUMB	chr10	0.190485	0.146164	0.0568645	7.81194	7.9697	7.80269	7.97896	7.60539	8.01849	7.99999	7.93942	1.11555	0.884991	1.31458	0.946664
12824747	---	---	chr27	0.399014	0.146172	0.444745	6.61888	6.84123	6.92603	6.53408	6.91538	6.32238	6.93667	6.74579	1.16663	1.31216	1.01486	1.34109
12875529	NM_001206034	RBM47	chr6	0.0884857	0.146182	0.482585	8.16703	8.33485	8.18028	8.3216	8.06312	8.27094	8.29745	8.37225	1.12336	0.906693	1.17636	1.07275
12832085	NM_001077090	C29H11orf86	chr29	0.0792889	0.146236	0.34424	5.14296	4.95421	4.97169	5.12549	5.01698	5.26894	4.92639	4.98204	0.87737	0.898878	0.93914	0.819662
12886251	NM_001192988	CLK4	chr7	0.741924	0.146253	0.433498	8.42685	8.46855	8.54274	8.35266	8.47189	8.38181	8.6136	8.32351	1.02933	1.14083	1.10321	0.960397
12847012	NM_001079615	TIPRL	chr3	0.558679	0.146281	0.0226151	8.38015	8.44289	8.33132	8.49172	8.16745	8.59285	8.49519	8.3906	1.04445	0.894775	1.25504	0.869191
12831379	ENSBTAT00000009476	EI24	chr29	0.933558	0.14647	0.70947	10.0908	10.0975	10.1552	10.0331	10.167	10.0145	10.1434	10.0517	1.00471	1.08831	0.9838	1.02606
12868908	NM_001195064	COX14	chr5	0.462764	0.146574	0.327504	10.094	10.2007	10.2555	10.0391	10.2738	9.91416	10.2372	10.1641	1.07675	1.16181	0.974989	1.18914
12702658	XM_002691691	NELF	chr11	0.304987	0.146842	0.325073	5.28792	5.16921	5.31396	5.14317	5.43018	5.14566	5.19774	5.14068	0.921012	1.12568	0.851196	0.996553
12841045	NM_001102261	GBP4	chr3	0.102892	0.146914	0.48609	7.17739	7.7782	7.74253	7.21307	7.56595	6.78884	7.91911	7.63729	1.51657	1.4434	1.27735	1.80057
12779084	NM_001076288	ZBTB8OS	chr2	0.478092	0.146999	0.980793	6.21647	5.99317	5.87056	6.33908	5.97845	6.45449	5.76267	6.22368	0.856605	0.722703	0.86108	0.852154
12708072	NM_001099152	LBH	chr11	0.43813	0.147003	0.620087	6.62944	6.83535	6.92972	6.53508	6.89221	6.36668	6.96722	6.70348	1.15341	1.31462	1.05337	1.26295
12905653	NM_001035445	RPS4X	chrX	0.821872	0.147042	0.246349	11.0941	11.073	11.1539	11.0133	11.1089	11.0793	11.1988	10.9472	0.985469	1.10237	1.06431	0.912473
12729927	NM_001102285	ACER3	chr15	0.217586	0.147069	0.720237	7.24619	7.51043	7.53516	7.22145	7.44057	7.05181	7.62976	7.39109	1.201	1.2429	1.14013	1.26513
12685868	NM_001046405	METTL6	chr1	0.548382	0.147168	0.865096	7.27535	7.38925	7.1908	7.4738	7.11781	7.43289	7.26379	7.51472	1.08215	0.821878	1.10648	1.05836
12693610	NM_174765	COL4A3BP	chr10	0.836912	0.147341	0.731786	9.57306	9.5566	9.50492	9.62474	9.49943	9.6467	9.51041	9.60279	0.988654	0.920304	1.00764	0.970023
12769370	NM_001034387	NUP85	chr19	0.0637211	0.147346	0.0439312	8.33494	8.53807	8.35886	8.51414	8.36881	8.30106	8.34892	8.72722	1.1512	0.897959	0.986305	1.34365
12900549	NM_001075819	CITED2	chr9	0.544574	0.14736	0.312084	10.6397	10.7171	10.7736	10.5832	10.8002	10.4792	10.7471	10.6872	1.05513	1.1411	0.963851	1.15506
12768995	NM_001034343	MRPS7	chr19	0.106002	0.147592	0.0252332	9.29663	9.07416	9.28421	9.08658	9.55571	9.03755	9.0127	9.13562	0.857096	1.14681	0.686336	1.07034
12871370	NM_001075875	ENOPH1	chr6	0.0789307	0.147759	0.392456	6.08789	5.72419	5.75865	6.05344	6.02566	6.15011	5.49163	5.95676	0.777171	0.815193	0.690622	0.874567
12894778	NM_001206123	KIF27	chr8	0.849059	0.147786	0.110838	5.59726	5.56019	5.433	5.72446	5.61325	5.58127	5.25274	5.86764	0.974635	0.817075	0.778893	1.21957
12882076	NM_001077020	FAF2	chr7	0.0724526	0.147857	0.320063	7.78217	8.06011	7.81125	8.03103	7.59813	7.96622	8.02438	8.09584	1.21246	0.858698	1.34374	1.09401
12843452	NM_001017936	RAB25	chr3	0.0791484	0.147928	0.44481	6.19027	6.64374	6.23316	6.60085	6.10116	6.27938	6.36516	6.92232	1.36933	0.775024	1.20081	1.56151
12756472	ENSBTAT00000063274	ZNF580	chr18	0.864702	0.14815	0.161498	5.31349	5.29883	5.24184	5.37048	5.18704	5.43994	5.29665	5.30101	0.989891	0.914697	1.07894	0.908193
12699692	ENSBTAT00000006430	DCTN1	chr11	0.0201567	0.148195	0.454802	6.3289	6.04728	6.10516	6.27102	6.20415	6.45364	6.00617	6.0884	0.822671	0.891397	0.871767	0.77634
12816502	ENSBTAT00000003725	COPS6	chr25	0.230663	0.148456	0.0737728	9.44869	9.56777	9.43569	9.58077	9.46757	9.42982	9.40381	9.73172	1.08604	0.90433	0.95677	1.23277
12850071	NM_001192318	MIOS	chr4	0.142744	0.148577	0.0675688	6.35704	6.83906	6.83535	6.36075	6.90089	5.8132	6.76982	6.90829	1.39669	1.38954	0.913154	2.13627
12855388	ENSBTAT00000008749	RALA	chr4	0.0342899	0.148605	0.67485	6.96817	7.28439	7.02258	7.22998	6.83527	7.10107	7.20988	7.35889	1.24506	0.866097	1.29649	1.19567
12877406	ENSBTAT00000013284	EGR1	chr7	0.157092	0.14864	0.540244	7.30843	6.95444	7.31236	6.95051	7.41474	7.20212	7.20998	6.6989	0.782416	1.28508	0.867682	0.705529
12712726	ENSBTAT00000064356	FGF9	chr12	0.611026	0.148683	0.403269	5.42469	5.24545	5.07293	5.59721	5.31087	5.53851	4.83499	5.65591	0.883167	0.695307	0.719025	1.08478
12768279	ENSBTAT00000021217	GOSR2	chr19	0.0398034	0.148777	0.511367	6.62924	7.03706	6.69492	6.97138	6.42981	6.82867	6.96004	7.11409	1.32669	0.825619	1.44416	1.21877
12693435	NM_174209	UACA	chr10	0.169846	0.149044	0.00595248	6.6068	6.77977	6.60208	6.78449	6.32494	6.88866	6.87923	6.68031	1.12738	0.881233	1.46844	0.865527
12839691	NM_001034576	MRPL24	chr3	0.21633	0.14935	0.796558	9.03183	9.15329	9.0211	9.16403	8.948	9.11566	9.0942	9.21239	1.08784	0.90568	1.10665	1.06934
12813144	NM_001075860	TSC22D4	chr25	0.140896	0.149382	0.321277	5.17591	4.97925	5.17372	4.98145	5.33701	5.01481	5.01042	4.94809	0.872571	1.14256	0.79742	0.954804
12831643	NM_001102237	TMEM132A	chr29	0.856956	0.149403	0.802381	5.21504	5.23069	5.28758	5.15816	5.26888	5.1612	5.30628	5.15511	1.01091	1.09385	1.02626	0.995787
12830650	NM_001098967	TMEM138	chr29	0.761064	0.149485	0.360015	5.01089	4.89987	5.22711	4.68365	5.45173	4.57005	5.00248	4.79725	0.925932	1.45746	0.732424	1.17057
12810791	ENSBTAT00000018748	BAIAP3	chr25	0.323658	0.149539	0.518307	5.59137	5.42013	5.37847	5.63303	5.51962	5.66312	5.23732	5.60295	0.888084	0.83824	0.82228	0.959153
12735189	NM_001101876	NSL1	chr16	0.904678	0.14955	0.86846	6.57965	6.5514	6.38975	6.7413	6.42342	6.73589	6.35608	6.74672	0.980607	0.783741	0.954401	1.00753
12827732	ENSBTAT00000009923	GLUD1	chr28	0.0676546	0.149632	0.374198	9.84415	10.005	9.98664	9.86247	9.94374	9.74457	10.0295	9.98037	1.11791	1.08989	1.06128	1.17756
12701287	NM_001035399	RABEPK	chr11	0.403931	0.149839	0.381749	6.68984	6.85993	6.92495	6.62482	6.92913	6.45056	6.92077	6.79909	1.12512	1.23125	0.994222	1.27326
12835804	NM_174025	CRYZ	chr3	0.184402	0.149848	0.117705	9.61325	9.78457	9.6055	9.79233	9.41774	9.80877	9.79327	9.77588	1.12609	0.878538	1.29732	0.977459
12879542	NM_001205886	MAN2A1	chr7	0.440945	0.149947	0.929195	7.4251	7.56705	7.63191	7.36025	7.55283	7.29738	7.71099	7.42312	1.10339	1.2072	1.11587	1.09106
12908931	ENSBTAT00000064401	LOC526838	chrX	0.540902	0.149979	0.0721656	5.36397	5.42873	5.31799	5.47471	5.38538	5.34257	5.2506	5.60686	1.04591	0.897059	0.910812	1.20104
12855038	NM_001166367	ATXN7L1	chr4	0.299548	0.150008	0.438121	5.53196	5.69952	5.73389	5.49758	5.58798	5.47594	5.87981	5.51923	1.12316	1.17797	1.2242	1.03045
12686874	XM_001251842	VPS8	chr1	0.179046	0.150127	0.707283	5.91674	6.14806	6.15681	5.90799	6.07261	5.76088	6.241	6.05511	1.1739	1.18823	1.1238	1.22624
12784294	NM_001206564	PPIL3	chr2	0.809838	0.150243	0.504562	8.09944	8.05326	7.93372	8.21897	8.02125	8.17763	7.8462	8.26032	0.968497	0.8206	0.885738	1.05899
12752761	---	---	chr18	0.773072	0.150293	0.697239	5.76541	5.70757	5.88549	5.58749	5.87535	5.65547	5.89564	5.5195	0.960698	1.22945	1.01416	0.910055
12901201	NM_001206040	IBTK	chr9	0.809742	0.15069	0.986258	7.1102	7.13491	7.04636	7.19875	7.03313	7.18727	7.0596	7.21022	1.01728	0.899764	1.01852	1.01603
12893830	NM_001075693	PSMD5	chr8	0.403598	0.150838	0.503795	7.12507	7.30938	7.05516	7.37929	7.03647	7.21367	7.07385	7.54491	1.13627	0.798779	1.02625	1.25809
12887659	NM_001130758	ATOX1	chr7	0.349416	0.151047	0.272571	9.88606	10.1303	10.1992	9.81714	10.221	9.55111	10.1773	10.0832	1.18444	1.30318	0.970191	1.446
12783515	NM_001206825	TSSK3	chr2	0.0787926	0.151159	0.329054	5.20922	5.50948	5.23881	5.47989	5.00818	5.41026	5.46944	5.54953	1.23137	0.846108	1.37674	1.10135
12878562	NM_001075453	ASF1B	chr7	0.111318	0.151177	0.625176	8.72132	9.01201	8.99667	8.73666	8.89428	8.54836	9.09906	8.92496	1.22323	1.19749	1.15251	1.29829
12748196	NM_001038223	MND1	chr17	0.492757	0.151182	0.151413	6.19481	6.3545	6.10321	6.4461	6.19471	6.19492	6.01171	6.69728	1.11704	0.788461	0.880868	1.41653
12692503	XM_002690942	DUOX2	chr10	0.993176	0.151197	0.872486	5.96922	5.97092	6.11788	5.82226	6.13302	5.80542	6.10274	5.83911	1.00118	1.22741	0.979229	1.02363
12754788	---	---	chr18	0.749858	0.151289	0.353811	6.30161	6.36447	6.18702	6.47907	6.24812	6.35511	6.12592	6.60303	1.04453	0.816741	0.918786	1.18749
12697828	---	---	chr10	0.495483	0.151294	0.593552	5.35155	5.24781	5.41174	5.18761	5.42312	5.27998	5.40037	5.09525	0.930618	1.16807	0.984356	0.879813
12895849	NM_001205428	TLN1	chr8	0.0136579	0.151353	0.402376	5.78627	6.02268	5.84018	5.96877	5.68526	5.88727	5.99509	6.05027	1.17806	0.914722	1.23956	1.11961
12880240	ENSBTAT00000022706	ANO8	chr7	0.425227	0.151411	0.431884	5.35303	5.26473	5.22759	5.39016	5.31525	5.39081	5.13994	5.38952	0.940633	0.893432	0.885581	0.999107
12910532	XM_001250514	LOC783730	chrX	0.771415	0.151574	0.52599	5.29469	5.36414	5.50637	5.15246	5.54783	5.04156	5.46492	5.26336	1.04931	1.27802	0.94415	1.16619
12802769	ENSBTAT00000022819	TBC1D7	chr23	0.256475	0.151696	0.522117	5.53773	5.26749	5.57545	5.22976	5.63543	5.44002	5.51548	5.01951	0.829186	1.27076	0.920218	0.747159
12859092	NM_001075495	CDC42EP1	chr5	0.871039	0.151721	0.220717	6.037	6.01889	5.94534	6.11055	5.88445	6.18954	6.00622	6.03156	0.987529	0.891795	1.08807	0.896282
12854099	NM_001075653	ASNS	chr4	0.821117	0.151966	0.0927655	8.10889	8.14992	7.99514	8.26368	8.13419	8.0836	7.85609	8.44375	1.02885	0.830161	0.824679	1.28356
12694582	NM_001046107	SNX1	chr10	0.986987	0.15201	0.841238	9.95873	9.95769	9.91076	10.0057	9.90486	10.0126	9.91666	9.99871	0.999276	0.936339	1.00821	0.990419
12821793	BC102175	FAM204A	chr26	0.363044	0.152047	0.692436	9.71465	9.6125	9.58152	9.74563	9.61063	9.81868	9.55242	9.67258	0.93164	0.892483	0.960456	0.903689
12894580	NM_001035397	EXOSC3	chr8	0.325744	0.152196	0.355725	8.51713	8.60584	8.4957	8.62726	8.40974	8.62451	8.58167	8.63001	1.06342	0.912846	1.12657	1.00382
12842960	NM_183407	STK25	chr3	0.959284	0.152382	0.165	6.90649	6.89797	7.02574	6.77872	7.14959	6.66339	6.90189	6.89404	0.994109	1.18675	0.842238	1.17337
12706846	ENSBTAT00000023171	PREPL	chr11	0.77218	0.152397	0.573833	6.60441	6.52836	6.76043	6.37233	6.72431	6.48451	6.79655	6.26016	0.948649	1.30867	1.05135	0.855984
12842529	XM_002686238	LOC100337426	chr3	0.953094	0.152485	0.0682383	4.97292	5.01777	5.5593	4.43139	4.80287	5.14297	6.31574	3.71981	1.03158	2.18542	2.85377	0.372896
12859141	ENSBTAT00000042716	TRIOBP	chr5	0.171255	0.152562	0.162311	6.14426	6.28905	6.14074	6.29257	5.9943	6.29421	6.28718	6.29093	1.10558	0.900107	1.22508	0.997728
12712995	NM_001038585	PCID2	chr12	0.311144	0.152575	0.472604	8.00444	8.22358	7.95666	8.27136	7.92415	8.08472	7.98916	8.458	1.16404	0.804014	1.04609	1.29529
12871252	BC109936	UTP3	chr6	0.969	0.152706	0.93099	5.70302	5.69795	5.79682	5.60416	5.80499	5.60105	5.78864	5.60727	0.996495	1.14287	0.988729	1.00432
12689950	NM_001172576	OAZ2	chr10	0.460878	0.152709	0.9645	7.05679	7.2313	7.31744	6.97065	7.23541	6.87817	7.39948	7.06313	1.12858	1.27173	1.12045	1.13678
12837217	XM_002686438	MED8	chr3	0.895965	0.152963	0.545975	7.4814	7.50631	7.35318	7.63452	7.28289	7.6799	7.42347	7.58914	1.01742	0.822828	1.10235	0.939029
12728222	XM_002693449	LRTOMT	chr15	0.183884	0.153133	0.798328	5.33906	5.19315	5.18732	5.34488	5.27393	5.40419	5.10072	5.28557	0.903808	0.89654	0.886871	0.92107
12831543	NM_001099088	CREBZF	chr29	0.729594	0.153214	0.974511	6.70904	6.67056	6.77181	6.6078	6.79282	6.62526	6.75079	6.59033	0.973683	1.1204	0.97129	0.976082
12731563	NM_001075381	NUCB2	chr15	0.553467	0.153255	0.204339	6.1	6.23981	5.99675	6.34306	5.77401	6.42598	6.21948	6.26014	1.10176	0.786589	1.36175	0.89141
12874397	ENSBTAT00000008985	UBA6	chr6	0.276788	0.153326	0.752101	6.92713	6.69942	6.96486	6.66169	7.04622	6.80804	6.8835	6.51534	0.85399	1.23385	0.893339	0.816373
12839788	NM_001099052	GOLPH3L	chr3	0.291304	0.153364	0.278017	7.91144	8.24368	8.30573	7.84939	8.31055	7.51233	8.30091	8.18645	1.25897	1.37206	0.993337	1.59563
12779980	NR_031072	MIR2357	chr2	0.798121	0.15337	0.76762	5.82034	5.79449	5.88191	5.73293	5.90977	5.73092	5.85405	5.73494	0.982242	1.10879	0.962111	1.00279
12870509	NM_001034249	ADH5	chr6	0.76127	0.153423	0.803339	8.4391	8.40902	8.497	8.35112	8.52436	8.35384	8.46963	8.34841	0.979365	1.1064	0.962777	0.996239
12896805	ENSBTAT00000007309	MLLT4	chr9	0.375733	0.153553	0.184717	7.30745	7.17111	7.12719	7.35137	7.09166	7.52325	7.16273	7.17949	0.909825	0.856083	1.0505	0.78799
12867438	NM_001046411	KRT7	chr5	0.906453	0.153679	0.896756	7.56537	7.59365	7.75686	7.40216	7.72711	7.40363	7.78661	7.40069	1.01979	1.27872	1.0421	0.997959
12683607	NM_205782	POFUT2	chr1	0.751735	0.153811	0.914491	5.99792	6.05727	6.16565	5.88954	6.14604	5.8498	6.18527	5.92927	1.042	1.21093	1.02757	1.05663
12736428	NM_001035377	CEP170	chr16	0.0538099	0.153968	0.794418	6.30858	6.61484	6.57181	6.35161	6.39919	6.21798	6.74443	6.48525	1.2365	1.1649	1.27037	1.20353
12847927	ENSBTAT00000007626	LOC781667	chr3	0.705703	0.154004	0.0334483	7.86462	7.81503	7.74332	7.93633	7.61808	8.11115	7.86856	7.7615	0.966214	0.874782	1.18961	0.78477
12706719	NM_001075971	STAMBP	chr11	0.97768	0.154032	0.289472	6.57559	6.5702	6.43092	6.71488	6.32965	6.82153	6.53218	6.60822	0.996269	0.821332	1.15071	0.862557
12826710	NM_001206102	MCU	chr28	0.148289	0.154096	0.473345	7.51433	7.76832	7.76641	7.51624	7.70081	7.32784	7.83201	7.70464	1.19251	1.18935	1.0952	1.29846
12739099	XM_002694056	UBIAD1	chr16	0.660355	0.154101	0.215815	8.62379	8.72403	8.84138	8.50644	8.93553	8.31205	8.74724	8.70082	1.07195	1.26133	0.877646	1.30927
12823104	XR_084081	LOC615206	chr26	0.0981307	0.154126	0.434946	5.32704	5.14753	5.31373	5.16084	5.44441	5.20967	5.18305	5.11201	0.883001	1.1118	0.8343	0.934545
12784068	NM_001037618	C2H2orf76	chr2	0.907078	0.154327	0.269149	8.54099	8.55719	8.44694	8.65124	8.36064	8.72134	8.53325	8.58113	1.01129	0.867964	1.1271	0.907388
12818684	NM_001102356	EIF3B	chr25	0.377858	0.154517	0.695736	8.068	8.18622	8.02972	8.2245	7.99656	8.13944	8.06288	8.30956	1.08539	0.873706	1.04704	1.12515
12799813	NM_001046374	RBM5	chr22	0.182672	0.154701	0.137466	8.30586	8.47644	8.29969	8.4826	8.31014	8.30158	8.28925	8.66363	1.12551	0.880925	0.985622	1.28524
12784210	NM_001037488	CDCA7	chr2	0.737379	0.15477	0.891668	7.96526	7.90573	7.80523	8.06576	7.84706	8.08345	7.7634	8.04807	0.959582	0.834785	0.94366	0.975772
12729648	NM_001076216	VPS11	chr15	0.0275164	0.154808	0.0908453	6.47593	6.81384	6.54084	6.74893	6.49726	6.45461	6.58443	7.04326	1.26392	0.865682	1.06229	1.50384
12774590	NM_174570	PAFAH2	chr2	0.238618	0.15482	0.120565	5.74695	5.94071	5.72566	5.96201	5.75855	5.73536	5.69276	6.18865	1.14373	0.84889	0.955427	1.36916
12751769	NM_001075708	ZNF350	chr18	0.372522	0.15497	0.258308	5.44305	5.14441	5.53667	5.05079	5.49523	5.39087	5.57812	4.71071	0.81302	1.40044	1.05914	0.624094
12794552	NM_001011682	GTDC2	chr22	0.325182	0.155092	0.447102	5.53932	5.39244	5.35792	5.57384	5.48775	5.59089	5.22809	5.55679	0.903205	0.860997	0.835287	0.976644
12757631	BC149923	ZNF792	chr18	0.191501	0.155157	0.158064	6.7081	7.04615	6.69222	7.06203	6.33967	7.07653	7.04477	7.04752	1.26404	0.773886	1.63025	0.980093
12758403	XM_610037	KIAA1609	chr18	0.320578	0.155285	0.388994	5.08095	5.29664	5.03188	5.34571	5.0172	5.1447	5.04656	5.54671	1.16126	0.804506	1.02056	1.32135
12813977	NM_001034775	BCL7B	chr25	0.875903	0.155458	0.764477	7.26798	7.22462	7.44997	7.04263	7.51329	7.02267	7.38666	7.06258	0.970394	1.32624	0.915969	1.02805
12691151	NM_001101191	SLC39A9	chr10	0.375772	0.155557	0.961159	6.12316	6.31962	6.0607	6.38209	5.9678	6.27852	6.15359	6.48565	1.14589	0.800297	1.13744	1.15439
12718339	NM_001101850	YME1L1	chr13	0.363776	0.155703	0.31165	9.13852	9.20461	9.11889	9.22423	9.12278	9.15425	9.11501	9.29421	1.04688	0.929587	0.994625	1.10188
12873486	NM_001077444	PDLIM5	chr6	0.366685	0.155719	0.975377	6.2512	6.50153	6.17564	6.57709	6.04625	6.45614	6.30503	6.69803	1.18948	0.757097	1.19647	1.18254
12831731	BC126771	RSF1	chr29	0.439417	0.155761	0.529083	7.91079	8.00263	7.87044	8.04297	7.78727	8.03431	7.95362	8.05163	1.06572	0.887287	1.12222	1.01208
12741700	---	---	chr17	0.112446	0.155831	0.744951	5.60714	5.24244	5.2631	5.58649	5.40951	5.80477	5.11668	5.36821	0.77663	0.799188	0.816297	0.73889
12866712	NM_001015631	C5H22orf28	chr5	0.372547	0.156045	0.177725	9.04986	9.14647	9.01978	9.17655	9.04571	9.054	8.99386	9.29909	1.06926	0.897036	0.964693	1.18516
12693426	ENSBTAT00000044796	TPM1	chr10	0.224913	0.156313	0.15681	8.96147	8.79445	8.77955	8.97637	8.76478	9.15816	8.79432	8.79457	0.890679	0.872473	1.02069	0.777229
12895640	NM_001079794	AQP3	chr8	0.0105983	0.156314	0.686471	9.46889	9.76128	9.69026	9.53991	9.56484	9.37294	9.81568	9.70688	1.22467	1.10984	1.1899	1.26045
12747840	NM_001101201	GAB1	chr17	0.472448	0.156353	0.660954	5.74479	5.6315	5.80264	5.57365	5.82489	5.6647	5.78039	5.48261	0.924476	1.17201	0.969629	0.881425
12747026	ENSBTAT00000002087	ARL6IP4	chr17	0.764712	0.156567	0.172262	6.36707	6.41238	6.27909	6.50036	6.36278	6.37136	6.1954	6.62936	1.03191	0.85781	0.890463	1.19582
12836692	BC116152	ZNHIT6	chr3	0.878036	0.156771	0.740541	8.0216	8.0399	8.11793	7.94356	8.12856	7.91464	8.10731	7.97248	1.01277	1.12847	0.985383	1.04091
12779795	NM_001205467	PIKFYVE	chr2	0.767285	0.156799	0.495227	6.39699	6.3539	6.48178	6.2691	6.55329	6.24069	6.41028	6.29752	0.970574	1.15884	0.905632	1.04017
12784613	ENSBTAT00000044482 // ENSBTAT00000044482	LOC100301369 // LOC783834	chr2	0.525237	0.156859	0.369228	10.6074	10.6606	10.5731	10.6949	10.5085	10.7062	10.6376	10.6837	1.03763	0.918992	1.09361	0.984512
12863934	NM_173999	BTG1	chr5	0.540257	0.156954	0.0303347	8.74051	8.81797	8.87114	8.68734	8.97945	8.50158	8.76284	8.8731	1.05515	1.13587	0.860589	1.29371
12743730	NM_001192823	CLIP1	chr17	0.08805	0.156993	0.0173583	8.63331	8.77542	8.64628	8.76244	8.47146	8.79516	8.82111	8.72973	1.10352	0.92264	1.27425	0.955658
12910237	ENSBTAT00000065164	CXHXorf48	chrX	0.876972	0.15719	0.464863	8.86443	8.83721	8.97921	8.72243	9.0576	8.67126	8.90083	8.77359	0.981312	1.19481	0.897036	1.07351
12889602	BC113223	FAM206A	chr8	0.59025	0.157303	0.903482	7.4856	7.64445	7.7795	7.35056	7.68226	7.28894	7.87673	7.41218	1.1164	1.34624	1.1443	1.08918
12880539	NM_001103278	SUGP1	chr7	0.738104	0.157444	0.7106	6.00246	6.06998	5.88904	6.18339	5.8178	6.18711	5.96028	6.17968	1.04791	0.815439	1.1038	0.994857
12779533	NM_001109803	SYNC	chr2	0.513212	0.157466	0.371094	6.1715	6.08545	6.2239	6.03304	6.20772	6.13528	6.24009	5.9308	0.942096	1.14145	1.02269	0.86785
12826371	NM_001075816	NTPCR	chr28	0.0801002	0.157531	0.761816	7.85995	8.07795	8.05545	7.88245	7.92847	7.79144	8.18243	7.97346	1.16312	1.1274	1.19248	1.13448
12831764	NM_001101223	FAM181B	chr29	0.694118	0.157533	0.0247217	6.60018	6.65409	6.52732	6.72695	6.66719	6.53317	6.38745	6.92073	1.03807	0.870775	0.823738	1.30818
12783059	NM_001191498	EPHB2	chr2	0.816828	0.157615	0.594067	5.28312	5.30546	5.22395	5.36464	5.18697	5.37927	5.26092	5.35001	1.01561	0.907087	1.05259	0.979923
12903071	ENSBTAT00000005604	SRPX	chrX	0.663734	0.157673	0.193	5.77463	5.86501	5.6686	5.97104	5.76205	5.78722	5.57515	6.15486	1.06464	0.810881	0.878494	1.29024
12880912	XM_617648	PTPRS	chr7	0.0302022	0.157684	0.0208225	5.43478	5.70961	5.65784	5.48654	5.66856	5.20099	5.64713	5.77209	1.20985	1.12608	0.985256	1.48565
12838617	NM_001098990	CYP4A22	chr3	0.338631	0.157902	0.185688	5.89896	6.13583	6.19527	5.83952	5.9108	5.88713	6.47975	5.79191	1.17843	1.27966	1.48344	0.936128
12878358	NM_001104968	ZNF266	chr7	0.403727	0.158075	0.217542	5.22192	5.03972	4.97353	5.28811	4.92829	5.51555	5.01878	5.06066	0.881357	0.804088	1.06473	0.729566
12853860	NM_001205431	CDK13	chr4	0.970611	0.15815	0.18836	7.19607	7.19927	7.13433	7.26102	7.07393	7.31821	7.19472	7.20383	1.00222	0.915929	1.08733	0.923779
12735300	NM_001166570	NPPB	chr16	0.266186	0.158244	0.837822	6.1904	5.86766	5.82171	6.23635	6.01222	6.36858	5.6312	6.10412	0.799548	0.750209	0.767895	0.832507
12754992	NM_001102548	LIG1	chr18	0.220829	0.158307	0.325426	7.8825	7.75936	7.74942	7.89245	7.86001	7.90499	7.63882	7.8799	0.91819	0.905614	0.85786	0.982763
12901187	ENSBTAT00000052712	BCLAF1	chr9	0.126688	0.158313	0.862607	9.70791	9.83614	9.71313	9.83092	9.65602	9.7598	9.77025	9.90203	1.09295	0.921601	1.0824	1.10361
12680112	NM_001034436	PLSCR1	chr1	0.666699	0.158598	0.54485	5.27128	5.36809	5.48284	5.15653	5.36618	5.17637	5.5995	5.13668	1.06941	1.2538	1.17554	0.972862
12858465	NM_001192155	C1RL	chr5	0.0396993	0.158636	0.631092	5.12562	4.90081	4.93899	5.08745	5.07597	5.17528	4.802	4.99961	0.855704	0.902213	0.827042	0.885359
12739488	ENSBTAT00000016985	TP53BP2	chr16	0.542	0.158724	0.859368	7.96324	8.02705	7.91944	8.07084	7.89676	8.02972	7.94213	8.11197	1.04522	0.900376	1.03195	1.05867
12747887	ENSBTAT00000007876	CCRN4L	chr17	0.977215	0.158766	0.463772	7.96656	7.96296	8.05645	7.87307	8.10481	7.82831	8.00809	7.91783	0.997509	1.13554	0.935158	1.06402
12751411	NM_001098957	DEF8	chr18	0.994038	0.158785	0.563767	5.0021	5.00304	5.09474	4.9104	5.13103	4.87317	5.05846	4.94763	1.00066	1.1363	0.950943	1.05297
12726974	NM_001038502	TRAPPC4	chr15	0.54092	0.158804	0.249499	8.18028	8.30732	8.09352	8.39408	8.1515	8.20906	8.03555	8.5791	1.09205	0.81194	0.922775	1.29239
12756507	XM_584814	LOC508086	chr18	0.895311	0.158856	0.250677	6.83757	6.79803	7.03632	6.59927	6.87985	6.79528	7.19279	6.40327	0.972967	1.35383	1.24224	0.762064
12867092	NM_001075998	IRAK4	chr5	0.278	0.158891	0.922883	5.8888	6.19132	6.2391	5.84102	6.0746	5.70301	6.40361	5.97904	1.2333	1.31775	1.25615	1.21086
12718133	ENSBTAT00000005606	ACSS1	chr13	0.999544	0.15894	0.323018	7.83012	7.83002	7.70284	7.95731	7.7907	7.86955	7.61497	8.04508	0.999931	0.838291	0.885319	1.12938
12889132	NM_174409	OSTF1	chr8	0.123906	0.159396	0.259677	9.89438	10.0518	9.90157	10.0446	9.87949	9.90928	9.92364	10.18	1.11531	0.905581	1.03108	1.20643
12724175	NM_001206353	PDP1	chr14	0.13935	0.159446	0.645501	7.34107	7.64553	7.3489	7.6377	7.24255	7.43959	7.45525	7.83582	1.23496	0.818579	1.15886	1.31606
12833541	NM_001080262	DDB1	chr29	0.698211	0.159559	0.304804	7.8804	7.92557	7.81859	7.98738	7.73535	8.02545	7.90182	7.94931	1.03181	0.889587	1.12231	0.948597
12803586	NM_001078065	CENPQ	chr23	0.223645	0.159604	0.990915	6.95842	6.72992	6.97728	6.71106	7.09257	6.82426	6.86199	6.59785	0.853527	1.20266	0.852292	0.854762
12906257	ENSBTAT00000063302	MAP3K7IP3	chrX	0.00282031	0.159893	0.0141949	5.71489	6.44146	6.23015	5.9262	5.58319	5.84659	6.87711	6.00581	1.6547	1.23452	2.45194	1.11668
12829973	NM_001024488	SLC3A2	chr29	0.285981	0.159901	0.0763899	7.17608	7.38387	7.14125	7.41871	7.21566	7.1365	7.06684	7.70091	1.15492	0.825042	0.901988	1.47878
12794366	NM_174347	HYAL2	chr22	0.00823171	0.159953	0.148038	6.02094	5.78006	5.95939	5.84162	6.14056	5.90132	5.77822	5.78191	0.84623	1.08506	0.777899	0.920562
12687385	XM_002684799	LRCH3	chr1	0.692441	0.159964	0.444851	7.44661	7.52367	7.34416	7.62611	7.23069	7.66252	7.45763	7.5897	1.05487	0.822477	1.17035	0.95078
12772901	NM_001046582	PITPNA	chr19	0.863283	0.160028	0.715407	7.94212	7.90983	7.79003	8.06192	7.84041	8.04382	7.73964	8.08001	0.977867	0.828235	0.932534	1.0254
12807296	XM_002697779	PMAIP1	chr24	0.616066	0.160104	0.353115	6.95867	7.17933	7.38683	6.75117	7.07017	6.84717	7.70349	6.65517	1.16527	1.55365	1.55113	0.875388
12727552	XM_002693758	OR6Q1	chr15	0.103921	0.160171	0.686226	5.36038	5.06409	5.33878	5.08568	5.45158	5.26918	5.22598	4.90219	0.814344	1.19176	0.855242	0.775401
12883285	NM_174464	SPARC	chr7	0.836134	0.160256	0.589499	11.122	11.1088	11.0692	11.1617	11.0585	11.1856	11.0799	11.1378	0.990883	0.937864	1.01494	0.967398
12906589	NR_031274	MIR664	chrX	0.943305	0.160408	0.00795122	8.03212	8.00173	8.32659	7.70726	7.70421	8.36004	8.94898	7.05448	0.979153	1.53617	2.36981	0.404565
12754742	NM_001207046	C18H19orf33	chr18	0.0892126	0.160536	0.21659	8.16507	8.54003	8.50502	8.20007	8.45084	7.8793	8.55921	8.52085	1.29681	1.23537	1.07801	1.56001
12724817	NM_001046070	LY6E	chr14	0.762356	0.160563	0.235836	6.69128	6.76227	6.89658	6.55697	7.00322	6.37934	6.78993	6.73461	1.05044	1.26541	0.862567	1.27923
12735459	NM_001100341	C16H1orf74	chr16	0.652229	0.160633	0.0895653	6.81157	6.91769	6.69465	7.0346	6.43279	7.19035	6.95651	6.87886	1.07633	0.790066	1.43766	0.805813
12845769	NM_001075916	DNAJB3	chr3	0.25911	0.160713	0.212538	5.68013	6.0838	5.62824	6.13569	5.20243	6.15784	6.05406	6.11355	1.32287	0.703463	1.80454	0.969765
12892532	XM_609099	ADAMTSL1	chr8	0.97768	0.160912	0.571477	4.9779	4.9846	4.80799	5.1545	4.87273	5.08307	4.74325	5.22594	1.00465	0.786484	0.914164	1.1041
12749439	NM_181030	FLT3LG	chr18	0.534744	0.160999	0.284376	5.06528	5.13915	5.01665	5.18778	5.0442	5.08636	4.98911	5.28919	1.05253	0.888151	0.962532	1.15095
12720740	BT021595	FAM110A	chr13	0.676942	0.161588	0.464708	5.31629	5.40985	5.20129	5.52485	5.07194	5.56063	5.33064	5.48906	1.067	0.799097	1.19639	0.951599
12716419	NM_001076909	CUL2	chr13	0.415338	0.161963	0.530881	7.8598	7.96678	8.00708	7.8195	7.99456	7.72504	8.01959	7.91396	1.07697	1.13885	1.0175	1.13992
12840261	ENSBTAT00000040289	EVI5	chr3	0.682513	0.162046	0.00648191	6.69926	6.65633	6.75332	6.60227	6.6136	6.78491	6.89304	6.41962	0.970684	1.11038	1.21372	0.776313
12705623	NM_001205772	SRBD1	chr11	0.425586	0.162068	0.272193	7.16864	7.38854	7.47571	7.08147	7.51869	6.81859	7.43273	7.34435	1.16465	1.31425	0.942158	1.43969
12862064	NM_001105431	TCP11L2	chr5	0.117702	0.162137	0.725111	5.20426	4.6568	5.17315	4.68792	5.38763	5.02089	4.95866	4.35495	0.684224	1.39981	0.742791	0.630275
12810866	NM_001113729	ZNF771	chr25	0.180095	0.162227	0.19869	6.40296	6.13741	6.40898	6.13139	6.66877	6.13716	6.14919	6.12563	0.831879	1.21217	0.697577	0.992039
12843108	NM_001075153	PLK3	chr3	0.441075	0.162246	0.525148	7.01432	7.13113	7.18104	6.9644	7.07461	6.95403	7.28747	6.97478	1.08433	1.16202	1.15898	1.01449
12720809	NM_001102268	CCNY	chr13	0.565878	0.162574	0.135805	7.38959	7.50402	7.30393	7.58968	7.09342	7.68576	7.51444	7.4936	1.08255	0.820317	1.33887	0.875295
12796656	NM_001192125	GOLGA4	chr22	0.495523	0.162649	0.14579	8.50956	8.59507	8.46258	8.64204	8.3261	8.69301	8.59907	8.59106	1.06106	0.883038	1.2083	0.931773
12844048	NM_001046051	PRPF3	chr3	0.110819	0.162669	0.887852	8.29555	8.42993	8.421	8.30448	8.34811	8.24299	8.4939	8.36596	1.09762	1.08412	1.10634	1.08898
12819923	NM_001083443	HIF1AN	chr26	0.788823	0.162673	0.78192	6.37681	6.43983	6.23898	6.57766	6.1749	6.57871	6.30307	6.5766	1.04465	0.790768	1.09291	0.998533
12768381	NM_001192130	RPTOR	chr19	0.379863	0.162918	0.90557	5.67661	5.82476	5.87066	5.63071	5.7867	5.56652	5.95462	5.6949	1.10815	1.18095	1.12344	1.09307
12687183	XM_002685132	KRTAP10-7	chr1	0.464182	0.163174	0.832148	5.86819	5.77052	5.91454	5.72416	5.94935	5.78703	5.87974	5.6613	0.934539	1.14106	0.952893	0.916539
12778080	ENSBTAT00000053405	C2H2orf69	chr2	0.872863	0.16342	0.559836	5.75382	5.71298	5.91681	5.54998	5.86246	5.64517	5.97117	5.4548	0.972094	1.28952	1.07826	0.876381
12783409	NM_001191342	MGAT5	chr2	0.42576	0.163435	0.973348	7.57561	7.7261	7.78534	7.51637	7.70697	7.44425	7.86371	7.58849	1.10994	1.20495	1.11476	1.10515
12878053	---	---	chr7	0.643868	0.163835	0.0179975	6.01801	5.95735	6.08161	5.89374	5.9423	6.09371	6.22092	5.69377	0.958825	1.13908	1.21303	0.75789
12858048	BC111682	C5H22orf32	chr5	0.726184	0.163904	0.0122881	9.86827	9.82746	9.93139	9.76434	10.1133	9.62324	9.74948	9.90545	0.972111	1.12276	0.7771	1.21606
12832185	NM_001083792	TTC9C	chr29	0.423966	0.16408	0.289556	9.74284	9.82439	9.85609	9.71115	9.86975	9.61594	9.84243	9.80635	1.05815	1.10569	0.981243	1.14109
12701514	NM_001206064	UXS1	chr11	0.48148	0.164093	0.199228	7.04646	7.15666	7.21305	6.99007	7.26033	6.83259	7.16577	7.14755	1.07938	1.16714	0.936557	1.24397
12690585	NM_001206037	NAA30	chr10	0.194055	0.164446	0.865757	7.53658	7.93866	7.52154	7.95371	7.34597	7.72719	7.6971	8.18023	1.32141	0.741143	1.27556	1.36892
12848624	---	---	chr4	0.224904	0.164498	0.642983	5.28034	5.40914	5.41906	5.27041	5.37876	5.18191	5.45936	5.35892	1.09339	1.10853	1.05746	1.13054
12773728	XM_001788882	KCTD2	chr19	0.854836	0.164511	0.907132	5.22517	5.29374	4.99083	5.52808	4.9784	5.47194	5.00326	5.58422	1.04867	0.689085	1.01738	1.08093
12877088	ENSBTAT00000008727	PRKACA	chr7	0.479948	0.164765	0.902492	6.68375	6.84542	6.60187	6.9273	6.50713	6.86037	6.69662	6.99422	1.11858	0.798064	1.14036	1.09722
12845607	NM_001205939	RLF	chr3	0.312764	0.164824	0.686049	7.06863	7.27418	7.31494	7.02787	7.25275	6.88451	7.37712	7.17124	1.15312	1.22015	1.09003	1.21987
12848148	ENSBTAT00000033319	C3H1orf190	chr3	0.744215	0.164927	0.39111	6.02616	6.05507	5.97725	6.10399	5.92441	6.12791	6.03009	6.08006	1.02024	0.915901	1.076	0.967374
12810821	NM_001105501	UBFD1	chr25	0.822492	0.164989	0.0515788	8.26373	8.22698	8.36259	8.12811	8.55046	7.97699	8.17472	8.27923	0.974849	1.17648	0.77071	1.23306
12820901	ENSBTAT00000004943	LRRC27	chr26	0.950041	0.165045	0.716733	5.17346	5.17835	5.23175	5.12007	5.24348	5.10345	5.22001	5.13668	1.00339	1.08049	0.983867	1.0233
12725341	ENSBTAT00000027186	TRMT12	chr14	0.941528	0.165061	0.732913	5.76481	5.78456	5.96748	5.5819	6.00363	5.526	5.93133	5.63779	1.01378	1.30639	0.951125	1.08057
12746036	NM_001205617	FAM101A	chr17	0.0207169	0.165183	0.424185	5.1091	4.89622	4.94233	5.06299	5.01475	5.20344	4.86991	4.92253	0.862812	0.919772	0.904478	0.823066
12893728	NM_001035487	TSPAN3	chr8	0.830827	0.165227	0.323992	5.19922	5.24682	5.06364	5.38239	4.92831	5.47012	5.19897	5.29466	1.03354	0.801766	1.20636	0.885487
12681884	ENSBTAT00000015905	PLSCR4	chr1	0.0698843	0.165252	0.556952	5.67415	6.20636	6.13945	5.74106	5.79116	5.55713	6.48774	5.92498	1.44615	1.31804	1.62066	1.29042
12820993	NM_001101262	MARVELD1	chr26	0.0380341	0.165368	0.139949	6.39833	6.07511	6.13282	6.34061	6.40543	6.39122	5.86021	6.29001	0.799286	0.865861	0.685286	0.932251
12788312	NM_001035438	MRPS36	chr20	0.193175	0.165369	0.784103	8.06801	8.35636	8.36647	8.0579	8.19272	7.94329	8.54023	8.1725	1.22125	1.23849	1.27236	1.1722
12764208	NM_001192702	USH1G	chr19	0.919013	0.165405	0.733949	5.79904	5.80866	5.73613	5.87158	5.7152	5.88288	5.75706	5.86027	1.00669	0.910388	1.02944	0.984454
12709794	NM_001075842	WDFY2	chr12	0.530489	0.16553	0.224407	5.77579	5.91296	5.68894	5.99981	5.75555	5.79604	5.62234	6.20358	1.09974	0.806158	0.911806	1.32642
12843481	NM_001143860	MACF1	chr3	0.301658	0.165563	0.0394475	7.72635	7.81454	7.71042	7.83047	7.57369	7.87902	7.84715	7.78192	1.06303	0.920157	1.20871	0.934914
12741472	NM_001105462	ATAD3A	chr16	0.291145	0.165713	0.995449	6.64265	6.85113	6.6082	6.88557	6.50341	6.78189	6.71299	6.98926	1.15547	0.825093	1.15635	1.15458
12898581	NM_001035427	SERINC1	chr9	0.678499	0.165789	0.983265	8.29111	8.35389	8.21453	8.43048	8.18155	8.40067	8.2475	8.46028	1.04448	0.860979	1.04678	1.04219
12765364	ENSBTAT00000005861	C19H17orf53	chr19	0.375376	0.16603	0.191762	5.60901	5.49998	5.46773	5.64126	5.44076	5.77726	5.4947	5.50526	0.927211	0.886672	1.0381	0.828169
12727406	BC151797	CUL5	chr15	0.0351402	0.166105	0.966134	6.67036	6.94406	6.89349	6.72093	6.7592	6.58151	7.02778	6.86035	1.20891	1.12706	1.20462	1.21321
12900054	NM_001046083	RPF2	chr9	0.15703	0.166148	0.828911	9.17932	9.34137	9.33951	9.18117	9.2465	9.11214	9.43252	9.25021	1.11887	1.116	1.13762	1.10043
12892798	NM_174628	UBQLN1	chr8	0.768469	0.166325	0.413695	10.0006	10.0282	10.0813	9.94753	10.1062	9.895	10.0564	10.0001	1.01933	1.09717	0.966069	1.07553
12808525	NM_001205479	ZNF24	chr24	0.245225	0.166361	0.0151733	8.2703	8.43799	8.25336	8.45494	7.98052	8.56007	8.52619	8.3498	1.12326	0.869598	1.45969	0.864377
12903879	NM_001100353	NXT2	chrX	0.702271	0.166415	0.686847	8.40248	8.51016	8.65689	8.25575	8.65985	8.14512	8.65394	8.36638	1.07749	1.32056	0.995911	1.16576
12711403	NM_001192100	NHLRC3	chr12	0.872087	0.166453	0.761264	7.05341	7.01834	6.88052	7.19123	6.93117	7.17564	6.82987	7.20681	0.975988	0.806246	0.932191	1.02184
12819655	NM_001014925	TMEM180	chr26	0.38248	0.166454	0.0609452	5.37138	5.56287	5.62169	5.31257	5.74085	5.00191	5.50253	5.62322	1.14194	1.23896	0.847731	1.53826
12857986	NM_001045932	FKBP11	chr5	0.0206096	0.166602	0.274904	6.3624	7.22603	7.03784	6.55059	6.79608	5.92871	7.2796	7.17247	1.81962	1.40177	1.39815	2.36814
12900939	NM_001046378	MTRF1L	chr9	0.191343	0.16688	0.71145	8.33877	8.47413	8.33461	8.47829	8.24825	8.42929	8.42097	8.52729	1.09837	0.905209	1.12718	1.07029
12745241	ENSBTAT00000050815	LOC100336258	chr17	0.102448	0.167108	0.570843	5.92408	6.28729	6.25742	5.95395	6.01514	5.83301	6.4997	6.07489	1.28629	1.23411	1.39915	1.18253
12882457	NM_001099211	SF3A2	chr7	0.953487	0.167119	0.333618	9.0901	9.09782	9.18824	8.99968	9.24932	8.93088	9.12715	9.06848	1.00536	1.13962	0.918807	1.10008
12794978	NM_001046000	CCDC71	chr22	0.932907	0.167144	0.423038	7.04131	7.02467	6.89213	7.17385	6.98048	7.10215	6.80378	7.24555	0.988527	0.82261	0.884722	1.10451
12744300	NM_001076249	FBXW7	chr17	0.0776411	0.167536	0.515962	6.63064	6.35838	6.59889	6.39013	6.68706	6.57422	6.51072	6.20605	0.828023	1.15569	0.884945	0.774763
12835587	XM_002685978	FAM189B	chr3	0.156715	0.167616	0.258236	5.58651	5.86065	5.59024	5.85692	5.5613	5.61171	5.61918	6.10212	1.20928	0.831234	1.04093	1.40485
12682437	NM_001195030	C1H3orf70	chr1	0.898767	0.167713	0.962179	6.16534	6.19715	6.35909	6.0034	6.33726	5.99342	6.38092	6.01338	1.0223	1.2796	1.03073	1.01393
12758234	NM_001205953	ZCCHC14	chr18	0.905329	0.167886	0.04953	6.07909	6.12115	5.84871	6.35153	6.19749	5.96069	5.49993	6.74237	1.02958	0.705726	0.616615	1.71913
12790424	NM_001205930	EXOC3L4	chr21	0.955912	0.168025	0.402483	5.317	5.32219	5.25293	5.38626	5.21063	5.42337	5.29522	5.34915	1.0036	0.911724	1.06039	0.949854
12856216	XM_002704155	LOC100336193	chr4	0.38632	0.168188	0.217426	5.73492	5.8315	5.86147	5.70495	5.74357	5.72628	5.97937	5.68362	1.06923	1.1146	1.17756	0.970867
12874951	ENSBTAT00000023680	PDS5A	chr6	0.659563	0.168286	0.461177	7.58859	7.65342	7.51679	7.72522	7.42984	7.74734	7.60373	7.70311	1.04596	0.865475	1.1281	0.969807
12811323	NM_174163	RAC1	chr25	0.482323	0.168447	0.159842	11.721	11.7548	11.7718	11.704	11.7896	11.6524	11.7541	11.7556	1.02372	1.04814	0.975695	1.07412
12746803	ENSBTAT00000024101	PXN	chr17	0.40631	0.168478	0.719446	5.99862	6.17096	6.23052	5.93906	6.18129	5.81596	6.27975	6.06217	1.12688	1.22388	1.07063	1.18609
12715132	NM_001015602	STK4	chr13	0.381222	0.168525	0.553344	6.19809	6.38572	6.14164	6.44216	5.98475	6.41143	6.29854	6.47289	1.13889	0.811963	1.24297	1.04352
12862500	BC110124	C5H12orf45	chr5	0.659735	0.168582	0.394415	7.55724	7.67417	7.80365	7.42776	7.63111	7.48336	7.97618	7.37216	1.08443	1.29764	1.27021	0.925819
12840944	NM_001078028	BCL10	chr3	0.221912	0.168768	0.414772	7.70599	7.95916	7.97613	7.68902	7.93293	7.47904	8.01932	7.89899	1.19182	1.22019	1.06171	1.33788
12852498	XM_002686666	DLX6	chr4	0.040694	0.168846	0.565329	6.23021	5.80048	5.87628	6.15441	6.03448	6.42593	5.71807	5.88289	0.742403	0.824658	0.803064	0.686324
12691043	XM_618627	TTLL5	chr10	0.255017	0.16898	0.840434	7.22847	7.01692	6.99362	7.25177	7.08106	7.37588	6.90618	7.12765	0.863605	0.836161	0.885838	0.841931
12879898	ENSBTAT00000006959	CHERP	chr7	0.113607	0.169124	0.518318	7.56119	7.27141	7.54096	7.29164	7.74303	7.37935	7.33889	7.20393	0.818026	1.18865	0.755688	0.885506
12695629	BC120464	TLN2	chr10	0.732861	0.169173	0.661754	5.81448	5.77823	5.72121	5.8715	5.71607	5.91289	5.72634	5.83011	0.975183	0.901068	1.00714	0.944237
12859545	NM_001083430	LETMD1	chr5	0.15173	0.169315	0.169873	5.35879	5.7236	5.36678	5.71561	5.35855	5.35903	5.375	6.07219	1.28771	0.785217	1.01147	1.63939
12687178	NM_001110186	KRTAP10-2	chr1	0.823474	0.169471	0.055994	5.16168	5.13806	5.07496	5.22478	5.19404	5.12931	4.95588	5.32024	0.983767	0.901366	0.847826	1.1415
12762724	NM_001039177	LGALS9	chr19	0.77882	0.169516	0.347482	6.08615	6.14079	6.25108	5.97586	6.31635	5.85595	6.18582	6.09577	1.0386	1.21018	0.913498	1.18084
12804613	NM_174648	MEA1	chr23	0.728669	0.169657	0.22751	10.1748	10.1397	10.0858	10.2288	10.041	10.3087	10.1306	10.1488	0.975971	0.905667	1.06411	0.895132
12733127	XM_002693439	FCHSD2	chr15	0.595167	0.16966	0.498366	8.18757	8.25548	8.13146	8.31159	8.1409	8.23425	8.12203	8.38893	1.04819	0.882626	0.987009	1.11317
12842420	BC151657	PRPF38B	chr3	0.933741	0.169837	0.299648	8.21934	8.21037	8.13851	8.29119	8.19992	8.23875	8.07711	8.34363	0.993802	0.899581	0.918392	1.0754
12789647	ENSBTAT00000026421	MRPS11	chr21	0.160569	0.169997	0.1503	7.92254	8.0974	7.92459	8.09536	7.92694	7.91815	7.92224	8.27256	1.12886	0.888372	0.996751	1.27847
12711330	NM_001083643	NEK3	chr12	0.944656	0.170018	0.0470512	6.31539	6.2996	6.14661	6.46839	6.39542	6.23537	5.89779	6.70141	0.989113	0.800079	0.708271	1.38131
12681185	NM_001205980	URB1	chr1	0.067419	0.170048	0.360144	5.70026	5.8488	5.82892	5.72014	5.71899	5.68154	5.93885	5.75874	1.10844	1.07832	1.16462	1.05497
12744088	XM_591880	ANKLE2	chr17	0.459312	0.17017	0.52174	6.74531	6.87565	6.68703	6.93394	6.67815	6.81246	6.6959	7.05541	1.09456	0.8427	1.01237	1.18341
12683010	NR_030836	MIR2286	chr1	0.266422	0.170212	0.797611	6.03398	5.86299	5.84186	6.05512	5.94672	6.12125	5.73701	5.98898	0.888232	0.862588	0.864712	0.912393
12899459	NM_174217	EZR	chr9	0.185465	0.170417	0.733977	10.1689	10.3429	10.1656	10.3462	10.0568	10.2809	10.2744	10.4115	1.12823	0.88235	1.16277	1.09472
12688924	NM_001099702	NO66	chr10	0.877936	0.170459	0.439381	7.52054	7.49835	7.61149	7.40741	7.5662	7.47488	7.65677	7.33993	0.984737	1.15195	1.06479	0.910706
12849407	NM_001083368	MEST	chr4	0.997515	0.170488	0.820162	5.1649	5.16583	4.95522	5.37551	4.98859	5.34121	4.92184	5.40982	1.00064	0.747271	0.954785	1.0487
12802182	ENSBTAT00000025246	POLR1C	chr23	0.575234	0.170504	0.378393	7.39468	7.31373	7.25266	7.45574	7.35724	7.43212	7.14809	7.47937	0.945437	0.868696	0.86505	1.03329
12828941	NM_001098147	RHOU	chr28	0.37297	0.170579	0.87026	5.72195	5.88571	5.93201	5.67565	5.86496	5.57895	5.99906	5.77236	1.1202	1.19446	1.09741	1.14346
12759968	XM_002694975	LGALS7	chr18	0.688255	0.170742	0.272008	11.1044	11.1621	11.2344	11.0321	11.2858	10.9231	11.183	11.1411	1.04074	1.15049	0.931219	1.16315
12801521	NM_001014872	DOM3Z	chr23	0.985675	0.170923	0.150941	5.40008	5.40195	5.3275	5.47453	5.24921	5.55095	5.40578	5.39812	1.0013	0.903103	1.11464	0.899482
12758340	NM_001034571	DDX19A	chr18	0.437666	0.170933	0.53639	7.11823	7.22291	7.26483	7.07631	7.25403	6.98242	7.27562	7.17019	1.07525	1.13959	1.01507	1.139
12813454	NM_001206639	USP42	chr25	0.0795814	0.171011	0.485322	5.93305	6.26371	5.9718	6.22496	5.74339	6.12271	6.20021	6.32721	1.25759	0.839056	1.37252	1.15229
12727223	NM_001075325	FOLR2	chr15	0.197003	0.171434	0.45423	5.91237	5.82405	5.91518	5.82124	5.9845	5.84024	5.84586	5.80224	0.940619	1.06728	0.908375	0.974007
12792907	XM_002696606	EFTUD1	chr21	0.488552	0.17163	0.795215	5.54142	5.6933	5.46406	5.77066	5.41639	5.66645	5.51173	5.87486	1.11102	0.80855	1.06832	1.15542
12821712	NM_001034240	OAT	chr26	0.247876	0.171758	0.721941	9.68996	9.77393	9.78203	9.68186	9.72737	9.65256	9.8367	9.71117	1.05993	1.0719	1.07873	1.04146
12692688	NR_038171	LOC788201	chr10	0.572145	0.171792	0.21188	6.76172	6.89121	6.98707	6.66586	7.06831	6.45512	6.90582	6.8766	1.09391	1.24938	0.893483	1.3393
12712739	NM_001076295	TEX30	chr12	0.997188	0.171832	0.480292	6.56023	6.56124	6.35823	6.76325	6.2554	6.86506	6.46105	6.66144	1.0007	0.755225	1.1532	0.86837
12909810	XM_589673	TEX28	chrX	0.0336392	0.171986	0.761908	5.29981	5.01857	5.24572	5.07266	5.36769	5.23193	5.12375	4.91339	0.822883	1.12745	0.844436	0.801879
12849034	NM_174532	DNAJB6	chr4	0.917131	0.172746	0.0315366	8.69363	8.70391	8.62941	8.76813	8.73879	8.64848	8.52003	8.88778	1.00715	0.908326	0.859308	1.18042
12879645	NM_001046261	PPAN	chr7	0.0666222	0.172819	0.675499	8.20718	7.9428	7.97915	8.17083	8.13998	8.27438	7.81832	8.06727	0.832555	0.875588	0.800149	0.866273
12903057	---	---	chrX	0.510167	0.172863	0.51676	11.1441	11.196	11.2251	11.115	11.1735	11.1146	11.2766	11.1154	1.03667	1.07926	1.07407	1.00057
12755803	ENSBTAT00000027261	TGFB1	chr18	0.670361	0.172988	0.467313	6.26099	6.17954	6.35421	6.08632	6.46486	6.05711	6.24357	6.11552	0.945113	1.20405	0.857797	1.04132
12785148	NM_174459	SEPP1	chr20	0.419157	0.173142	0.702035	8.42779	8.61342	8.68019	8.36103	8.63097	8.22462	8.7294	8.49743	1.13731	1.2476	1.07061	1.20816
12704336	XM_001790496	ZDHHC12	chr11	0.396968	0.173198	0.0135551	6.31341	6.45407	6.26854	6.49894	6.42235	6.20447	6.11474	6.79341	1.10241	0.852401	0.807979	1.50414
12874274	NM_001034501	GRPEL1	chr6	0.358147	0.173222	0.580556	8.35113	8.16181	8.3991	8.11385	8.55019	8.15208	8.24801	8.07562	0.877017	1.21862	0.811024	0.948381
12757598	NM_001025334	APRT	chr18	0.227351	0.173265	0.885622	6.11017	6.29456	6.09769	6.30705	6.01622	6.20411	6.17915	6.40998	1.13634	0.864921	1.11956	1.15338
12795957	ENSBTAT00000065210	SMARCC1	chr22	0.88545	0.173389	0.622824	8.08732	8.07202	8.0052	8.15413	7.98664	8.18799	8.02376	8.12027	0.989451	0.901917	1.02606	0.954145
12888292	ENSBTAT00000023082 // ENSBTAT00000023082	FCHSD1 // DIAPH1	chr7	0.054343	0.173415	0.166617	7.22	6.77564	6.84534	7.15029	7.2226	7.2174	6.46809	7.08318	0.734909	0.809473	0.59275	0.911161
12722422	NM_001192417	UBR5	chr14	0.893536	0.173454	0.349897	8.24284	8.26103	8.15665	8.34722	8.08315	8.40252	8.23015	8.29191	1.01269	0.876262	1.10726	0.926193
12825774	NM_001012668	HK1	chr28	0.621888	0.173538	0.89941	7.60625	7.52473	7.68095	7.45003	7.73212	7.48038	7.62977	7.41968	0.945057	1.17358	0.931516	0.958794
12889824	ENSBTAT00000032429	TTC39B	chr8	0.962107	0.173674	0.224994	5.74604	5.73251	5.9389	5.53964	6.1226	5.36947	5.75519	5.70982	0.990665	1.31882	0.775172	1.26606
12746516	NM_001034441	PSMD9	chr17	0.752521	0.173955	0.279049	8.52495	8.5719	8.65255	8.4443	8.54708	8.50282	8.75801	8.38579	1.03308	1.15528	1.15743	0.922084
12820022	ENSBTAT00000021438	BTAF1	chr26	0.706619	0.173976	0.807526	7.47484	7.42063	7.54838	7.34708	7.59301	7.35667	7.50376	7.3375	0.96312	1.14974	0.940008	0.9868
12688769	NM_001101912	C10H14orf118	chr10	0.436097	0.174034	0.487998	6.52369	6.28033	6.61873	6.1853	6.63227	6.41511	6.60518	5.95548	0.844773	1.35044	0.981395	0.727171
12752408	NM_001035359	MARK4	chr18	0.548871	0.174066	0.992887	6.74376	6.90057	6.64004	7.00429	6.56048	6.92705	6.71961	7.08153	1.11482	0.776875	1.11661	1.11303
12710102	XM_002691772	AKAP11	chr12	0.0215914	0.174167	0.74395	6.05963	6.50859	6.1587	6.40952	5.90492	6.21435	6.41248	6.60469	1.36505	0.840419	1.42165	1.3107
12729197	NM_001076056	PPME1	chr15	0.161641	0.174303	0.533727	8.40277	8.51273	8.40449	8.51102	8.32568	8.47987	8.4833	8.54217	1.0792	0.928816	1.11545	1.04413
12879314	NM_001103253	JUND	chr7	0.306729	0.174396	0.0874807	7.35399	7.43044	7.34075	7.44368	7.23661	7.47136	7.44489	7.416	1.05443	0.931139	1.1553	0.962358
12745587	NM_001191427	SCOC	chr17	0.786079	0.174403	0.743505	6.78559	6.80727	6.7406	6.85225	6.74284	6.82834	6.73837	6.87617	1.01514	0.925529	0.996905	1.03371
12830811	NM_001192423	PLCB3	chr29	0.303684	0.17454	0.562744	6.86549	7.02875	6.83798	7.05626	6.71095	7.02003	6.96501	7.09249	1.11982	0.859585	1.19256	1.05151
12825663	NM_001114862	DEFB103B	chr27	0.398852	0.174552	0.540563	6.93892	7.23093	7.32425	6.84561	7.28357	6.59428	7.36492	7.09694	1.22434	1.39343	1.058	1.41682
12709906	NM_001099034	TPP2	chr12	0.616891	0.175066	0.592762	6.4876	6.3572	6.24105	6.60376	6.376	6.59921	6.10611	6.6083	0.913579	0.777705	0.829383	1.00632
12789309	NM_001082601	UBR7	chr21	0.860867	0.175121	0.489945	8.06759	8.08765	7.99771	8.15754	8.02748	8.1077	7.96794	8.20737	1.014	0.895129	0.959571	1.07153
12872195	NM_001046474	PPM1K	chr6	0.561616	0.175131	0.846953	8.01101	8.11268	7.94016	8.18353	7.8725	8.14951	8.00782	8.21754	1.07302	0.844773	1.09834	1.04828
12890662	NM_001192578	TOPORS	chr8	0.49989	0.175163	0.176147	6.24701	6.19144	6.16212	6.27633	6.13294	6.36108	6.1913	6.19158	0.962215	0.92389	1.04128	0.889151
12875048	NM_001206044	AFAP1	chr6	0.419042	0.175274	0.663255	5.68263	5.8009	5.64065	5.84288	5.61314	5.75212	5.66815	5.93364	1.08543	0.869206	1.03887	1.13408
12861515	NM_001206876	SENP1	chr5	0.131998	0.17532	0.184974	7.33402	7.59807	7.584	7.34809	7.56719	7.10085	7.6008	7.59533	1.20084	1.17765	1.02357	1.40881
12703296	ENSBTAT00000054707	FOXI3	chr11	0.714278	0.175459	0.129786	7.11936	7.16363	7.2257	7.0573	7.29842	6.94031	7.15297	7.17429	1.03116	1.12381	0.9041	1.17608
12830101	ENSBTAT00000006689	MRPL49	chr29	0.0641398	0.175464	0.178771	6.45884	5.94167	6.0159	6.38461	6.09162	6.82607	5.94018	5.94315	0.698739	0.774473	0.900356	0.54227
12892073	ENSBTAT00000017165	LOC782470	chr8	0.820194	0.175543	0.81343	7.11772	7.15856	7.26341	7.01287	7.22179	7.01366	7.30504	7.01209	1.02871	1.18965	1.0594	0.998914
12839865	NM_001206018	TRIM33	chr3	0.703203	0.175581	0.941675	8.88555	8.92312	8.97297	8.83569	8.95059	8.82051	8.99536	8.85088	1.02639	1.09983	1.03152	1.02128
12881678	NM_001193031	DAZAP1	chr7	0.349383	0.175621	0.612198	7.59784	7.4838	7.457	7.62464	7.5446	7.65108	7.36941	7.5982	0.924	0.8903	0.885646	0.964015
12800454	NM_001034779	MAPKAPK3	chr22	0.946906	0.176139	0.82391	5.37629	5.38429	5.46393	5.29665	5.44656	5.30602	5.48129	5.28728	1.00556	1.12294	1.02437	0.987094
12707239	ENSBTAT00000015471	SOS1	chr11	0.123647	0.176194	0.099595	6.17542	6.42149	6.40559	6.19133	6.15021	6.20063	6.66096	6.18202	1.18597	1.16011	1.42479	0.987181
12680337	XM_002685151	DOPEY2	chr1	0.141849	0.176501	0.310559	5.24112	5.48253	5.47229	5.25136	5.26977	5.21246	5.6748	5.29026	1.18215	1.16548	1.32411	1.05541
12770490	NM_001046202	TMEM101	chr19	0.0748517	0.176502	0.400649	5.38946	5.11502	5.15041	5.35407	5.22545	5.55347	5.07537	5.15468	0.826774	0.868343	0.901203	0.758492
12689200	NM_001081588	DAAM1	chr10	0.8001	0.176571	0.997284	7.38962	7.34624	7.24883	7.48703	7.27023	7.50901	7.22744	7.46505	0.970382	0.847807	0.970774	0.96999
12799866	NM_001192819	CCDC66	chr22	0.0186153	0.176645	0.584261	5.89204	6.34322	5.99586	6.2394	5.72216	6.06192	6.26956	6.41689	1.36716	0.844669	1.46145	1.27896
12680230	BC151785	MORC3	chr1	0.0386496	0.176662	0.810301	6.4948	6.84816	6.56063	6.78233	6.40308	6.58651	6.71817	6.97815	1.27754	0.857552	1.24409	1.31189
12730390	BC109655	SPCS2	chr15	0.772073	0.177085	0.485019	8.39287	8.35701	8.289	8.46088	8.26342	8.52232	8.31457	8.39944	0.975449	0.887684	1.03609	0.918357
12721034	NM_001076478	PSMF1	chr13	0.496841	0.177133	0.675551	5.96956	6.17746	6.28459	5.86242	6.24438	5.69474	6.3248	6.03011	1.15501	1.33994	1.05733	1.2617
12698608	---	---	chr11	0.246736	0.177153	0.578631	8.36839	8.55663	8.35199	8.57303	8.30225	8.43453	8.40173	8.71153	1.13937	0.857944	1.07139	1.21167
12882214	NM_001205434	PURA	chr7	0.290935	0.177211	0.18604	6.46856	6.31648	6.4908	6.29423	6.66304	6.27407	6.31856	6.3144	0.899952	1.14597	0.787589	1.02834
12877494	BC133464	C7H19orf43	chr7	0.362085	0.177671	0.219741	8.60725	8.70199	8.58343	8.72581	8.60054	8.61395	8.56631	8.83767	1.06787	0.906021	0.976549	1.16774
12746249	NM_001038081	PPIL2	chr17	0.863024	0.177695	0.371071	6.44663	6.41833	6.54626	6.31869	6.63468	6.25857	6.45784	6.37882	0.980577	1.17086	0.884639	1.08692
12695970	NM_001192716	TMOD2	chr10	0.248303	0.177827	0.915138	5.56386	5.32141	5.58524	5.30003	5.69551	5.43221	5.47497	5.16785	0.845309	1.21859	0.858242	0.832571
12889669	NM_001192951	GLDC	chr8	0.89259	0.17787	0.554943	8.01876	7.99541	8.12705	7.88712	8.0874	7.95013	8.1667	7.82412	0.983942	1.18093	1.05651	0.91636
12882629	BC149660	LOC100138660	chr7	0.072047	0.177944	0.879368	5.2008	4.87437	4.91818	5.15699	5.06833	5.33328	4.76804	4.98071	0.797507	0.847445	0.812086	0.783189
12882130	NM_001078123	ABHD8	chr7	0.172139	0.17802	0.229369	5.19479	5.0189	5.19353	5.02016	5.20458	5.185	5.18247	4.85533	0.885224	1.12768	0.984797	0.795718
12836929	NM_001205584	SF3B4	chr3	0.283014	0.178022	0.883914	8.66592	8.79125	8.80806	8.64911	8.75376	8.57808	8.86235	8.72015	1.09076	1.11647	1.07818	1.10349
12684848	NM_001034523	AP2M1	chr1	0.991075	0.178069	0.286669	8.8087	8.81056	8.69434	8.92492	8.78362	8.83378	8.60506	9.01606	1.00129	0.852292	0.883585	1.13467
12895030	XM_002689804	CNTFR	chr8	0.63976	0.17845	0.728421	5.15336	5.20376	5.25291	5.10421	5.24638	5.06034	5.25945	5.14808	1.03556	1.10857	1.0091	1.06271
12890802	NM_001172227	TESK1	chr8	0.0686837	0.17847	0.029758	5.69935	5.40076	5.44241	5.6577	5.77419	5.62452	5.11064	5.69088	0.813042	0.861374	0.631322	1.04707
12900476	NM_001038550	SERAC1	chr9	0.634711	0.178561	0.703118	5.12142	5.22459	5.32286	5.02315	5.3126	4.93024	5.33311	5.11606	1.07413	1.23089	1.01432	1.13746
12875869	HQ159409	PROM1	chr6	0.574953	0.178657	0.99137	6.15573	6.05749	5.98593	6.22729	6.03598	6.27547	5.93587	6.17912	0.934177	0.845942	0.932957	0.935398
12736829	XM_001790418	RERE	chr16	0.221067	0.178711	0.0895762	6.78429	6.60091	6.79388	6.59133	6.75544	6.81315	6.83231	6.36951	0.880635	1.15073	1.05473	0.735278
12689010	ENSBTAT00000011481	DCAF4	chr10	0.414928	0.178809	0.732703	5.03081	5.20365	5.26241	4.97205	5.21188	4.84975	5.31294	5.09435	1.12727	1.22294	1.07256	1.18477
12862788	ENSBTAT00000014486	PPP1R1A	chr5	0.06326	0.178835	0.405415	6.90598	6.48589	6.84391	6.54796	7.14389	6.66807	6.54392	6.42785	0.747376	1.22769	0.659772	0.846612
12725711	NM_001076045	LACTB2	chr14	0.87507	0.178968	0.773104	6.37181	6.32078	6.12181	6.57078	6.10049	6.64313	6.14312	6.49843	0.965247	0.732564	1.03	0.904568
12894921	NM_001101182	ESCO2	chr8	0.222319	0.179038	0.883667	7.71383	7.88015	7.70495	7.88902	7.63153	7.79613	7.77837	7.98192	1.12219	0.880214	1.10715	1.13744
12758530	NM_001015650	DHODH	chr18	0.186476	0.179062	0.883016	6.53532	6.79836	6.80074	6.53294	6.65497	6.41567	6.9465	6.65021	1.2	1.20397	1.22394	1.17654
12844565	NM_001098956	SNX27	chr3	0.983882	0.179205	0.209815	7.30767	7.31008	7.22641	7.39134	7.30191	7.31343	7.1509	7.46925	1.00167	0.891967	0.900624	1.11406
12807656	NM_001075189	USP14	chr24	0.279141	0.179449	0.794321	7.02735	7.22168	7.00274	7.24628	6.92857	7.12612	7.07691	7.36644	1.14419	0.84467	1.1083	1.18125
12733478	ENSBTAT00000009126	LMO2	chr15	0.525881	0.179495	0.246681	5.86202	5.76496	5.70844	5.91855	5.66698	6.05707	5.7499	5.78003	0.934936	0.864468	1.05916	0.825281
12800496	NM_001076398	NRADD	chr22	0.131942	0.179506	0.712836	5.47203	5.22183	5.45754	5.23632	5.61216	5.33189	5.30292	5.14074	0.840781	1.16572	0.807065	0.875905
12843470	NM_001035039	FLAD1	chr3	0.235878	0.179522	0.995173	5.60476	5.814	5.82861	5.59015	5.72347	5.48605	5.93375	5.69424	1.15608	1.17974	1.15691	1.15524
12773184	NM_001076969	MIS12	chr19	0.390848	0.179556	0.915187	6.67337	6.90655	6.9755	6.60442	6.87321	6.47353	7.07779	6.73531	1.17542	1.29332	1.15235	1.19896
12883164	NM_174277	CLTB	chr7	0.896955	0.179578	0.095641	8.96905	8.98419	8.8959	9.05734	8.78648	9.15162	9.00531	8.96306	1.01055	0.894129	1.16379	0.877481
12694736	NM_001205789	ZFYVE26	chr10	0.109927	0.179706	0.20229	5.65965	5.88424	5.67886	5.86504	5.65478	5.66453	5.70293	6.06555	1.16844	0.878929	1.03394	1.32045
12756421	ENSBTAT00000064859	NTF4	chr18	0.208125	0.179778	0.36117	5.93716	5.63214	5.94775	5.62155	6.20956	5.66476	5.68594	5.57833	0.80943	1.25371	0.695626	0.941852
12795294	NM_001075527	CRBN	chr22	0.899677	0.179797	0.666691	8.22756	8.20475	8.34105	8.09126	8.39152	8.06359	8.29058	8.11892	0.984315	1.18904	0.932423	1.03909
12746540	ENSBTAT00000022553	SETD1B	chr17	0.261033	0.179812	0.0942836	6.17184	6.34251	6.15444	6.3599	6.19938	6.1443	6.1095	6.57551	1.12558	0.86726	0.939602	1.34837
12813885	ENSBTAT00000037556	ATP6V0C	chr25	0.343504	0.180025	0.518212	11.7024	11.6431	11.6302	11.7154	11.6398	11.7651	11.6206	11.6656	0.95972	0.942662	0.9868	0.933382
12771305	NM_001192661	NEURL4	chr19	0.691861	0.180164	0.557846	5.62084	5.66826	5.72688	5.56221	5.73834	5.50334	5.71543	5.62109	1.03341	1.12091	0.984246	1.08504
12899887	NM_001034308	PNRC1	chr9	0.550679	0.180254	0.738752	10.3197	10.3879	10.4321	10.2754	10.417	10.2224	10.4472	10.3285	1.04838	1.11472	1.02117	1.07633
12833290	NM_001080242	RELA	chr29	0.397794	0.180313	0.14103	6.46907	6.65962	6.71798	6.41071	6.45288	6.48525	6.98307	6.33616	1.1412	1.23736	1.44412	0.901819
12762549	NM_001037453	MRPL27	chr19	0.73115	0.180374	0.665089	10.071	10.0459	10.0083	10.1086	10.0366	10.1053	9.97995	10.1119	0.98279	0.932819	0.961505	1.00455
12816075	NM_001205635	CCL26	chr25	0.323045	0.180536	0.772088	5.83089	6.23569	5.75535	6.31123	5.61143	6.05035	5.89928	6.5721	1.32391	0.680245	1.22082	1.4357
12739784	NM_001205853	EDEM3	chr16	0.673147	0.180601	0.810851	6.10395	6.17855	6.01971	6.26278	5.96129	6.2466	6.07814	6.27896	1.05307	0.844944	1.08436	1.02268
12803584	XM_868935	LOC616819	chr23	0.69773	0.180625	0.222323	7.11656	7.2023	7.31118	7.00768	7.40596	6.82717	7.21641	7.18819	1.06123	1.23414	0.876877	1.28434
12728269	NM_001099010	RRAS2	chr15	0.636744	0.180659	0.450149	10.1726	10.2114	10.2484	10.1357	10.2601	10.0851	10.2366	10.1862	1.02722	1.08123	0.983801	1.07257
12678498	NM_001076796	APP	chr1	0.654963	0.180872	0.16964	5.48538	5.41209	5.56132	5.33615	5.48223	5.48853	5.64041	5.18377	0.95047	1.16892	1.11588	0.809577
12778346	---	---	chr2	0.910791	0.180901	0.157418	7.35951	7.38334	7.51788	7.22498	7.66124	7.05778	7.37451	7.39217	1.01666	1.2251	0.819761	1.26084
12856825	NM_174048	CELA1	chr5	0.672227	0.181004	0.575488	5.46629	5.39476	5.31446	5.5466	5.39767	5.53492	5.23125	5.55827	0.951627	0.851373	0.891055	1.01632
12701269	NM_001034584	MSH2	chr11	0.866872	0.181079	0.728466	8.1034	8.0778	7.98554	8.19567	8.02488	8.18193	7.94619	8.20942	0.982413	0.864456	0.946917	1.01924
12843583	NM_001045953	HAX1	chr3	0.228844	0.18111	0.0236413	8.59535	8.50033	8.49475	8.60094	8.63721	8.55349	8.35228	8.64838	0.936259	0.929038	0.820781	1.06798
12714006	NM_001075157	ACOT8	chr13	0.853198	0.181162	0.888944	6.44764	6.41946	6.53829	6.3288	6.54175	6.35352	6.53483	6.30409	0.980658	1.15628	0.995216	0.966313
12761729	ENSBTAT00000034703	EXOC7	chr19	0.599178	0.181211	0.668771	6.17599	6.28171	6.36665	6.09105	6.27083	6.08116	6.46247	6.10095	1.07603	1.21049	1.14206	1.01381
12829880	NM_001101863	CCDC90B	chr29	0.307761	0.181347	0.354558	8.26054	8.42437	8.23379	8.45112	8.07773	8.44334	8.38984	8.4589	1.12026	0.860155	1.24152	1.01085
12718310	NM_001098865	SLPI	chr13	0.13158	0.181479	0.0631375	7.56387	8.28825	8.24446	7.60766	7.42715	7.70059	9.06177	7.51474	1.6522	1.55487	3.10505	0.879133
12878003	ENSBTAT00000020206	ILVBL	chr7	0.937924	0.181547	0.183452	5.72376	5.71504	5.79634	5.64246	5.87728	5.57023	5.7154	5.71469	0.993977	1.11256	0.893856	1.10531
12718958	NM_001075499	RAB18	chr13	0.877372	0.181762	0.266798	8.5888	8.60651	8.5188	8.67651	8.57493	8.60266	8.46267	8.75035	1.01235	0.896449	0.925133	1.10779
12865213	NM_001102378	PRPH	chr5	0.0640943	0.181863	0.379724	5.00553	4.71294	4.9619	4.75657	5.17465	4.83642	4.74916	4.67673	0.816435	1.15295	0.744586	0.895216
12793156	NM_001098462	UBE3A	chr21	0.138872	0.181867	0.858737	8.63818	8.82729	8.64801	8.81746	8.54247	8.73388	8.75354	8.90103	1.14006	0.889182	1.15754	1.12284
12902050	ENSBTAT00000016857	LOC100138905	chrU_7180002008858	0.764356	0.18209	0.822475	8.2192	8.33502	8.01218	8.54204	7.99759	8.44081	8.02678	8.64326	1.08359	0.692626	1.02044	1.15065
12787357	NM_001082433	OCLN	chr20	0.653053	0.182111	0.199246	8.574	8.51168	8.44796	8.63772	8.57021	8.57779	8.32572	8.69765	0.957725	0.876753	0.844116	1.08663
12756438	NM_001014863	GFOD2	chr18	0.336402	0.182167	0.591847	5.03404	4.88388	4.8533	5.06462	4.88694	5.18114	4.81967	4.94809	0.901152	0.863752	0.954447	0.850834
12894401	NM_001192693	NXNL2	chr8	0.347352	0.1822	0.674112	5.03372	4.90838	4.88078	5.06132	4.97118	5.09627	4.79038	5.02638	0.916786	0.882371	0.882217	0.952711
12859364	ENSBTAT00000019876	MLF2	chr5	0.990402	0.182228	0.496462	7.89983	7.89865	7.96622	7.83226	8.00023	7.79943	7.93221	7.8651	0.999187	1.0973	0.953944	1.04658
12683438	ENSBTAT00000029080	IFNAR1	chr1	0.841721	0.182286	0.210457	6.66743	6.71696	6.86233	6.52206	6.99677	6.3381	6.7279	6.70603	1.03493	1.26599	0.829972	1.2905
12760916	NM_174466	SOCS3	chr19	0.333964	0.182372	0.62838	5.43792	5.65316	5.39495	5.69613	5.34064	5.5352	5.44926	5.85706	1.1609	0.811586	1.0782	1.24994
12790753	NM_001206138	DYNC1H1	chr21	0.188471	0.182426	0.369923	6.86195	7.04921	6.86058	7.05058	6.70407	7.01983	7.01709	7.08133	1.1386	0.876605	1.24231	1.04355
12780852	NM_001100317	MARCH7	chr2	0.573011	0.182449	0.622705	7.22154	7.31432	7.3803	7.15556	7.29346	7.14962	7.46714	7.1615	1.06643	1.16856	1.12793	1.00827
12796793	NM_001206045	CRTAP	chr22	0.722794	0.18246	0.916456	5.92081	5.87183	5.80178	5.99086	5.8335	6.00812	5.77006	5.9736	0.966619	0.877166	0.956981	0.976355
12735004	NM_001206655	PRRC2C	chr16	0.309599	0.182593	0.560265	9.71942	9.80968	9.82447	9.70463	9.80493	9.63391	9.84402	9.77534	1.06456	1.08662	1.02747	1.103
12791225	NM_001076459	APOPT1	chr21	0.392331	0.182653	0.43171	8.20362	8.10042	8.23378	8.07025	8.33272	8.07451	8.13484	8.066	0.930966	1.12002	0.871828	0.994116
12720625	NM_001076107	FAM188A	chr13	0.639344	0.182667	0.132569	8.37506	8.30638	8.24057	8.44087	8.38885	8.36127	8.0923	8.52046	0.953509	0.870373	0.814195	1.11666
12827718	NM_174241	ANXA8L1	chr28	0.907595	0.183227	0.288436	7.75144	7.77378	7.63083	7.89438	7.51565	7.98722	7.74601	7.80154	1.01561	0.833038	1.17313	0.879235
12785577	BC119922	C20H5orf41	chr20	0.618345	0.183249	0.500145	5.89072	5.95711	5.83302	6.01481	5.75474	6.02669	5.91129	6.00293	1.0471	0.88161	1.11462	0.983664
12742309	NM_001205602	SMPD4	chr17	0.0829724	0.183361	0.445018	5.91573	5.74481	5.89454	5.766	5.94381	5.88765	5.84526	5.64435	0.888274	1.09318	0.933973	0.844811
12838134	NM_001035282	DGKD	chr3	0.729739	0.183439	0.0890901	6.34578	6.41452	6.24422	6.51608	6.03288	6.65867	6.45556	6.37349	1.0488	0.828251	1.34041	0.820635
12737769	XM_002694292	RD3	chr16	0.831412	0.183469	0.135325	5.06248	5.0369	5.13188	4.9675	5.23764	4.88732	5.02611	5.04768	0.982423	1.12068	0.863621	1.11757
12769741	NM_001046102	TM4SF5	chr19	0.987488	0.183494	0.426676	5.01874	5.01616	4.90496	5.12994	4.84025	5.19722	4.96967	5.06265	0.998215	0.855609	1.09385	0.910941
12710899	NM_001113572	GTF3A	chr12	0.0672592	0.18361	0.900798	5.43246	5.77987	5.48318	5.72915	5.32068	5.54423	5.64568	5.91406	1.27228	0.843251	1.25267	1.2922
12888160	NM_001191146	ELL2	chr7	0.709908	0.18364	0.79894	9.41969	9.36733	9.48958	9.29744	9.49786	9.34152	9.48131	9.25336	0.964361	1.14246	0.988596	0.94072
12889169	ENSBTAT00000024010	TGFBR1	chr8	0.736259	0.183726	0.552876	8.107	8.15084	8.04005	8.2178	7.97935	8.23465	8.10075	8.20094	1.03086	0.884081	1.08779	0.976907
12814857	---	---	chr25	0.865665	0.183983	0.392379	6.19851	6.15855	6.3399	6.01717	6.25772	6.1393	6.42207	5.89504	0.972686	1.25069	1.12066	0.844249
12729535	XM_588351	RNF26	chr15	0.514262	0.184034	0.847688	6.16965	6.28753	6.10591	6.35127	6.02972	6.30958	6.1821	6.39296	1.08514	0.843604	1.1114	1.0595
12876590	XM_592234	NSD1	chr7	0.143971	0.184039	0.47907	9.003	8.7612	8.77284	8.99135	8.95078	9.05523	8.59491	8.92748	0.845686	0.859452	0.781399	0.915262
12842132	NM_001110445	PCP4L1	chr3	0.967945	0.184092	0.989398	6.52573	6.51361	6.72583	6.31351	6.7339	6.31757	6.71777	6.30945	0.991631	1.33083	0.98888	0.994391
12888233	NM_001078024	TRIM52	chr7	0.897414	0.18412	0.611607	5.4222	5.37446	5.65125	5.14541	5.76948	5.07491	5.53302	5.2159	0.967455	1.41995	0.848824	1.10266
12852169	ENSBTAT00000009791	AKAP9	chr4	0.729352	0.184279	0.779404	7.73385	7.77676	7.67075	7.83986	7.63194	7.83576	7.70956	7.84395	1.03019	0.889393	1.05528	1.0057
12748091	NM_001206214	GGT1	chr17	0.814177	0.184502	0.051605	5.58897	5.61427	5.52818	5.67506	5.40414	5.7738	5.65222	5.57633	1.0177	0.903198	1.18763	0.87208
12887304	NM_001034685	DCAF15	chr7	0.901883	0.184817	0.987969	5.99204	6.01676	5.86764	6.14115	5.85377	6.1303	5.88151	6.152	1.01728	0.827305	1.01942	1.01515
12726064	NM_001080327	TTC35	chr14	0.870641	0.184825	0.0973415	8.68304	8.70452	8.60386	8.7837	8.70738	8.6587	8.50033	8.9087	1.015	0.8828	0.866304	1.18921
12818816	---	---	chr26	0.738207	0.184924	0.55467	5.60045	5.56756	5.65099	5.51702	5.69662	5.50428	5.60537	5.52975	0.977461	1.09732	0.938713	1.01781
12684493	NM_001192337	SPSB4	chr1	0.996374	0.184996	0.215261	5.12012	5.11907	5.2771	4.96208	5.1309	5.10933	5.4233	4.81483	0.999273	1.24403	1.22468	0.815355
12817950	NM_001083487	DAGLB	chr25	0.435106	0.185051	0.943502	5.09013	4.96681	5.13515	4.9218	5.19127	4.989	5.07903	4.85459	0.918071	1.15938	0.925156	0.911041
12806452	BC109937	C23H6orf136	chr23	0.499647	0.185181	0.357083	6.85058	6.98261	6.78426	7.04893	6.6276	7.07355	6.94091	7.02431	1.09584	0.832385	1.24255	0.966445
12794332	NM_174076	GPX1	chr22	0.760106	0.185211	0.904701	8.83077	8.87711	8.95723	8.75065	8.92498	8.73655	8.98947	8.76475	1.03265	1.15395	1.04572	1.01974
12780219	ENSBTAT00000025292	TNP1	chr2	0.792219	0.185344	0.792987	5.40633	5.54568	5.836	5.11602	5.83574	4.97693	5.83627	5.2551	1.10141	1.64717	1.00037	1.21265
12866823	NM_001193032	CCDC91	chr5	0.138478	0.185597	0.956089	5.89081	6.08389	6.07299	5.90171	5.97298	5.80863	6.17299	5.99479	1.1432	1.12605	1.1487	1.13773
12689506	NM_001105374	PRMT5	chr10	0.891366	0.185814	0.103564	8.95756	8.94481	9.01469	8.88768	9.10036	8.81476	8.92903	8.9606	0.991202	1.09203	0.888018	1.10638
12837038	NM_001024485	POMGNT1	chr3	0.707306	0.185919	0.197519	5.33991	5.38292	5.28365	5.43918	5.18648	5.49333	5.38081	5.38504	1.03027	0.897798	1.14419	0.927685
12880677	NM_001046387	MRI1	chr7	0.0159935	0.185921	0.0451817	7.42533	7.84403	7.52724	7.74212	7.48677	7.36389	7.56771	8.12036	1.33673	0.861619	1.05771	1.68935
12803382	NM_001034704	DDAH2	chr23	0.329334	0.18599	0.173288	5.6234	5.80903	5.58874	5.8437	5.36444	5.88237	5.81304	5.80503	1.13731	0.838008	1.36471	0.947804
12689738	NM_001105384	EPB41L4A	chr10	0.407931	0.18609	0.430503	7.98093	7.82589	7.77739	8.02943	7.78114	8.18072	7.77364	7.87814	0.898108	0.839711	0.994817	0.8108
12749487	NM_174665	PAFAH1B3	chr18	0.931715	0.186223	0.669459	7.89034	7.91009	8.05689	7.74354	8.09634	7.68433	8.01743	7.80274	1.01378	1.24259	0.946769	1.08554
12745221	XM_002694576	LOC100300938	chr17	0.363347	0.18624	0.211244	5.8992	6.10957	6.15963	5.84913	6.20085	5.59756	6.11842	6.10071	1.15698	1.24014	0.944466	1.41731
12851747	ENSBTAT00000016780	NAA38	chr4	0.467516	0.186421	0.517017	9.63228	9.52103	9.67983	9.47348	9.68593	9.57863	9.67373	9.36834	0.925789	1.15376	0.991577	0.864367
12903439	NM_001192150	FMR1	chrX	0.637267	0.186712	0.137451	8.76248	8.82652	8.8864	8.7026	8.75021	8.77475	9.02259	8.63045	1.04539	1.13587	1.2078	0.90482
12739288	NM_001035104	EIF2D	chr16	0.369516	0.187391	0.735844	7.24525	7.15735	7.26685	7.13575	7.32714	7.16336	7.20656	7.10814	0.940892	1.09513	0.919819	0.962448
12756748	NM_001075424	MVD	chr18	0.592622	0.187716	0.649043	5.45189	5.37825	5.32226	5.50788	5.39036	5.51342	5.25416	5.50234	0.950238	0.87927	0.909915	0.992347
12739806	ENSBTAT00000052383	PPPDE1	chr16	0.0899067	0.187733	0.959192	8.39987	8.65876	8.43063	8.628	8.30492	8.49483	8.55635	8.76116	1.19655	0.872144	1.19039	1.20275
12733908	XM_001253208	LOC785069	chr15	0.34814	0.187789	0.805237	5.12257	4.99471	4.96764	5.14965	5.01498	5.23015	4.92029	5.06914	0.91519	0.881474	0.93647	0.894393
12736725	ENSBTAT00000010631	CEP350	chr16	0.800024	0.187838	0.0764881	7.51781	7.48171	7.40333	7.59619	7.28865	7.74698	7.51801	7.44541	0.975284	0.874868	1.17232	0.811367
12719126	NM_001101083	RBM17	chr13	0.910212	0.187841	0.9983	7.76164	7.74235	7.63616	7.86783	7.64599	7.8773	7.62633	7.85837	0.986717	0.851649	0.986467	0.986966
12877784	NM_001015527	GTF2F1	chr7	0.206622	0.188018	0.537722	8.10561	8.26735	8.102	8.27097	8.05982	8.15141	8.14417	8.39054	1.11864	0.889472	1.06021	1.18028
12908119	XM_002699835	CXHXorf57	chrX	0.772661	0.188051	0.0696292	5.04588	5.1537	5.35209	4.84749	4.94141	5.15035	5.76277	4.54463	1.0776	1.41872	1.76708	0.657144
12797711	ENSBTAT00000054070 // ENSBTAT00000054070	LOC100138407 // LOC100125949	chr22	0.779627	0.188256	0.636835	6.03019	6.16595	6.42592	5.77023	6.24324	5.81715	6.60859	5.72331	1.09867	1.57537	1.2882	0.937023
12734386	XM_003585199	LOC100337507	chr16	0.142952	0.188414	0.345136	7.03613	7.40628	7.05616	7.38625	6.98795	7.08432	7.12437	7.68818	1.29248	0.795487	1.09918	1.51978
12842925	NM_176652	NDUFS5	chr3	0.764977	0.188593	0.0196527	11.1351	11.1561	11.193	11.0982	11.2719	10.9984	11.1141	11.1981	1.01465	1.06787	0.89637	1.14853
12807319	NR_030804	MIR2381	chr24	0.475898	0.188616	0.935773	6.73157	6.65259	6.76636	6.6178	6.80143	6.66172	6.7313	6.57388	0.946726	1.10846	0.952555	0.940932
12745765	ENSBTAT00000006828	MVK	chr17	0.367666	0.188706	0.0408144	5.78537	5.70467	5.68527	5.80477	5.82245	5.74828	5.54808	5.86126	0.945602	0.920503	0.826813	1.08146
12827204	NM_001079801	GGPS1	chr28	0.979594	0.189127	0.878703	8.76695	8.76152	8.62075	8.90772	8.60724	8.92666	8.63425	8.88878	0.996239	0.819619	1.0189	0.974084
12758846	ENSBTAT00000043415	LOC539209	chr18	0.356548	0.189341	0.58431	5.52825	5.43202	5.54961	5.41066	5.56942	5.48707	5.52979	5.33425	0.935477	1.1011	0.972905	0.899489
12799015	NM_001100364	MTMR14	chr22	0.0803174	0.189372	0.348186	7.83025	8.10878	8.07176	7.86728	8.00458	7.65593	8.13893	8.07862	1.21295	1.15227	1.0976	1.34043
12779266	NM_001103298	LOC615263	chr2	0.550343	0.189421	0.588393	8.08241	8.19006	8.25716	8.01532	8.25205	7.91276	8.26226	8.11787	1.07748	1.1825	1.0071	1.15277
12892852	NM_001101045	ZFAND5	chr8	0.904657	0.18961	0.959664	11.2152	11.2205	11.2474	11.1883	11.2459	11.1845	11.2489	11.192	1.00365	1.04185	1.00211	1.00519
12727374	NM_001015558	TMX2	chr15	0.348681	0.189635	0.470692	8.75688	8.60324	8.57106	8.78906	8.70667	8.80709	8.43545	8.77103	0.898981	0.859757	0.828621	0.975315
12698272	XM_002691700	LOC100336552	chr11	0.23995	0.189684	0.78103	5.92916	5.77198	5.76238	5.93877	5.85917	5.99915	5.66559	5.87838	0.89678	0.884915	0.874434	0.919698
12884960	NM_001034410	CXCL14	chr7	0.194844	0.189721	0.443403	6.40548	6.86866	6.87149	6.40265	6.50539	6.30557	7.2376	6.49972	1.37858	1.384	1.66118	1.14405
12790569	NM_001046317	MPHOSPH10	chr21	0.765885	0.18988	0.789357	8.53775	8.49632	8.61068	8.42338	8.61282	8.46268	8.60855	8.38408	0.971688	1.13863	0.997044	0.946976
12821522	AY911318	NDUFB8	chr26	0.805113	0.19004	0.212506	10.6211	10.6553	10.5449	10.7315	10.4394	10.8029	10.6505	10.6601	1.02398	0.878719	1.15763	0.905766
12888488	NM_001206868	RAD50	chr7	0.543573	0.19008	0.849655	9.76428	9.81585	9.73321	9.84692	9.71543	9.81313	9.75099	9.88071	1.03639	0.924207	1.02496	1.04796
12900595	NM_001038139	ORC3	chr9	0.86995	0.190104	0.0715275	7.52909	7.55156	7.4479	7.63274	7.56702	7.49115	7.32879	7.77434	1.0157	0.879746	0.847782	1.21688
12702883	NM_001099164	GPR107	chr11	0.580521	0.190112	0.316687	5.97151	6.07274	5.89934	6.14491	5.94147	6.00155	5.8572	6.28828	1.07269	0.843478	0.943263	1.21988
12830577	NM_001101977	PICALM	chr29	0.862161	0.190256	0.749415	9.23225	9.25683	9.3398	9.14928	9.30488	9.15962	9.37472	9.13894	1.01718	1.14118	1.0496	0.985763
12781589	NM_001102007	PHACTR4	chr2	0.0717165	0.190264	0.625831	7.80054	8.12042	7.84704	8.07392	7.64587	7.95521	8.04821	8.19263	1.24823	0.854483	1.32165	1.17888
12841951	ENSBTAT00000048797 // ENSBTAT00000048797	GNG11 // LOC788596	chr3	0.882859	0.190321	0.632228	9.23461	9.20185	9.36785	9.06861	9.4376	9.03162	9.29809	9.10561	0.977551	1.23049	0.907828	1.05263
12872038	NM_001076131	DNAJB14	chr6	0.870132	0.190342	0.0401352	6.0323	6.07165	6.21396	5.88999	5.92972	6.13487	6.4982	5.6451	1.02765	1.25177	1.48296	0.712138
12718784	NM_001034315	AHCY	chr13	0.25385	0.190379	0.392151	9.38269	9.59276	9.60908	9.36637	9.58209	9.18328	9.63607	9.54946	1.15675	1.18321	1.03812	1.28893
12763973	NM_001191394	KCNH6	chr19	0.935966	0.190669	0.452317	5.28161	5.26994	5.37341	5.17814	5.3242	5.23901	5.42262	5.11727	0.991949	1.14494	1.0706	0.919078
12810664	NM_001046572	NARS	chr24	0.818695	0.190702	0.63296	9.39725	9.42507	9.32958	9.49273	9.28661	9.50789	9.37256	9.47758	1.01947	0.893075	1.06139	0.979212
12849736	NM_001075389	MPLKIP	chr4	0.72538	0.190828	0.353672	7.70402	7.65409	7.77443	7.58368	7.86608	7.54195	7.68277	7.62541	0.965989	1.14135	0.880684	1.05956
12814265	NM_001076488	LCMT1	chr25	0.0520088	0.190883	0.360065	6.3377	6.85133	6.7616	6.42743	6.38952	6.28588	7.13369	6.56897	1.42764	1.26066	1.67501	1.2168
12909790	XM_002700227	XK	chrX	0.0277189	0.190937	0.430821	6.17886	5.65265	6.06415	5.76736	6.41508	5.94264	5.71323	5.59208	0.694379	1.22841	0.614783	0.78428
12830492	NM_001098952	UEVLD	chr29	0.167985	0.191087	0.641971	6.12215	6.43181	6.13062	6.42334	5.92499	6.31932	6.33626	6.52736	1.23941	0.816363	1.32986	1.15512
12756039	NM_001040492	MT1A	chr18	0.52203	0.191113	0.266988	9.18167	9.25993	9.3024	9.1392	9.19452	9.16883	9.41028	9.10958	1.05574	1.11977	1.16132	0.959767
12821417	ENSBTAT00000004405	CTBP2	chr26	0.391063	0.191187	0.375597	6.93727	6.82321	6.79194	6.96854	6.90794	6.9666	6.67594	6.97047	0.923981	0.884788	0.851458	1.00268
12823954	ENSBTAT00000000989	DCTN6	chr27	0.337405	0.191255	0.261144	9.32696	9.2052	9.35009	9.18207	9.33926	9.31466	9.36092	9.04948	0.919064	1.12351	1.01513	0.832092
12853180	ENSBTAT00000013082	AKR1B1	chr4	0.0824337	0.191284	0.336211	8.45423	8.8055	8.7592	8.50052	8.48959	8.41886	9.02882	8.58217	1.27568	1.19639	1.4532	1.11985
12857355	NM_175796	ATP5B	chr5	0.74147	0.191415	0.599528	10.9891	11.0052	10.9644	11.0299	10.9692	11.009	10.9596	11.0508	1.01124	0.95558	0.99336	1.02945
12715935	ENSBTAT00000019972	PARD3	chr13	0.341036	0.191467	0.27214	7.19802	7.29394	7.31264	7.17933	7.32026	7.07579	7.30501	7.28287	1.06874	1.09681	0.989486	1.15435
12835609	XM_002683613	LOC100301420	chr3	0.142408	0.191529	0.995874	5.05526	5.19824	5.06356	5.18994	4.99182	5.11869	5.13529	5.26119	1.10419	0.916126	1.10456	1.10381
12790177	XM_002696631	SIN3A	chr21	0.427403	0.191557	0.090611	8.00273	8.0978	8.12987	7.97067	8.18745	7.81802	8.07228	8.12332	1.06812	1.11667	0.923277	1.23568
12873825	NM_001192190	BOD1L	chr6	0.978667	0.191592	0.0113809	7.33687	7.33977	7.26553	7.41112	7.11148	7.56226	7.41958	7.25997	1.00201	0.904012	1.23807	0.81096
12711006	XM_002691931	LOC100298891	chr12	0.841654	0.191721	0.991249	5.12551	5.1694	5.00015	5.29475	4.97701	5.27402	5.0233	5.31549	1.03089	0.815298	1.03261	1.02917
12797659	ENSBTAT00000064461	ZXDC	chr22	0.347809	0.191799	0.514189	5.68422	5.55078	5.71151	5.52349	5.82426	5.54419	5.59877	5.50279	0.911652	1.1392	0.855308	0.971708
12901148	NM_001103289	PLAGL1	chr9	0.0350471	0.191957	0.766417	6.18851	5.22253	5.41978	5.99125	5.8394	6.53762	5.00017	5.44488	0.51193	0.672933	0.558941	0.468873
12883740	NM_001192032	SLC25A42	chr7	0.0261818	0.191974	0.679742	5.17698	4.91066	4.96977	5.11787	5.08008	5.27388	4.85947	4.96185	0.831437	0.902441	0.858201	0.805508
12722170	NM_001110068	C14H8orf59	chr14	0.888646	0.192009	0.813593	8.83764	8.87679	9.04467	8.66976	8.9921	8.68317	9.09723	8.65635	1.02751	1.29675	1.07559	0.981581
12696419	BC112793	MAPK6	chr10	0.376063	0.192171	0.688447	8.40036	8.51298	8.54089	8.37245	8.45932	8.34139	8.62245	8.40351	1.0812	1.12384	1.11972	1.044
12768209	NM_001075221	MIEN1	chr19	0.837513	0.19222	0.708639	6.85109	6.91235	7.0818	6.68164	6.99527	6.70691	7.16834	6.65637	1.04338	1.31966	1.12746	0.965572
12759047	ENSBTAT00000056565	PLLP	chr18	0.740479	0.192378	0.0295962	6.05352	6.1298	5.93764	6.24567	6.16978	5.93726	5.70551	6.55409	1.05429	0.807744	0.724836	1.5335
12867644	ENSBTAT00000013112	CAND1	chr5	0.0964916	0.192396	0.550897	7.88983	7.76384	7.87539	7.77829	7.91665	7.86302	7.83413	7.69356	0.916376	1.06962	0.944408	0.889177
12681316	NM_001081529	NXPE3	chr1	0.988347	0.19251	0.896158	6.37174	6.36912	6.49051	6.25035	6.50352	6.23996	6.47749	6.26075	0.998187	1.18112	0.982123	1.01451
12870479	NM_001101844	MRPL1	chr6	0.609815	0.192542	0.135996	9.27005	9.3394	9.2141	9.39535	9.07485	9.46525	9.35335	9.32544	1.04924	0.881939	1.21294	0.907642
12679011	ENSBTAT00000015321	ATR	chr1	0.28494	0.192783	0.363462	6.23558	6.40777	6.21586	6.42748	6.05698	6.41418	6.37475	6.44078	1.12676	0.863569	1.24641	1.01861
12877724	ENSBTAT00000027991	LOC505564	chr7	0.454179	0.192787	0.99131	6.98847	6.83869	7.04632	6.78085	7.12229	6.85466	6.97035	6.70704	0.901389	1.20203	0.900041	0.90274
12892466	NR_030917	MIR2474	chr8	0.355797	0.192854	0.105533	6.10687	6.28854	6.32757	6.06784	6.40062	5.81311	6.25452	6.32256	1.1342	1.19726	0.903691	1.42351
12706268	NM_001076873	BRD3	chr11	0.00893642	0.193062	0.126801	6.66366	6.35181	6.57895	6.43651	6.8193	6.50802	6.33861	6.36501	0.805611	1.10377	0.716635	0.905633
12837513	NM_001035076	TMEM59	chr3	0.0496715	0.193132	0.25595	9.25172	9.50796	9.29787	9.46182	9.24084	9.26261	9.3549	9.66103	1.19436	0.892579	1.08227	1.31807
12792761	NM_001075800	EAPP	chr21	0.322365	0.193148	0.0740422	8.64911	8.73594	8.63476	8.75028	8.51009	8.78813	8.75944	8.71243	1.06204	0.923052	1.18868	0.948886
12734063	XM_002694043	MTOR	chr16	0.0568775	0.193153	0.446163	6.65744	6.84702	6.68948	6.81498	6.55862	6.75626	6.82035	6.87369	1.14043	0.91669	1.19892	1.0848
12882508	XM_001787259	RAPGEF6	chr7	0.325545	0.193474	0.892765	6.18417	6.34794	6.37564	6.15646	6.2827	6.08563	6.46858	6.22729	1.12021	1.16407	1.13751	1.10317
12760918	NM_174472	TIMP2	chr19	0.509936	0.193673	0.583404	7.36468	7.51496	7.59108	7.28856	7.57835	7.15102	7.60382	7.4261	1.10978	1.2333	1.01781	1.21006
12830844	NM_001103249	CARS	chr29	0.559379	0.193725	0.456857	6.56469	6.65452	6.50741	6.7118	6.51993	6.60945	6.49488	6.81416	1.06424	0.867902	0.982784	1.15245
12707900	NM_001034758	IAH1	chr11	0.963917	0.193848	0.265709	5.79946	5.78793	5.62349	5.96391	5.774	5.82493	5.47297	6.10289	0.992037	0.78981	0.811676	1.21248
12797458	ENSBTAT00000013997	MAGI1	chr22	0.389592	0.193952	0.0293711	6.00788	6.11674	5.97885	6.14577	5.77718	6.23858	6.18053	6.05296	1.07838	0.890745	1.32258	0.879273
12779686	ENSBTAT00000016997 // ENSBTAT00000016997	LOC785758 // SRSF9	chr2	0.0209317	0.193954	0.327911	10.8929	10.9628	10.9093	10.9464	10.8605	10.9252	10.9581	10.9676	1.0497	0.974648	1.06995	1.02983
12905408	NM_001192322	RLIM	chrX	0.599899	0.194041	0.414936	8.12659	8.03066	8.20013	7.95712	8.32311	7.93007	8.07715	7.98417	0.93567	1.18345	0.843256	1.03821
12680069	BC102960	ARL13B	chr1	0.194319	0.194143	0.353847	8.14304	7.9417	7.94166	8.14308	7.97137	8.3147	7.91194	7.97146	0.869746	0.869695	0.959645	0.788268
12775981	NM_001205662	RNF19B	chr2	0.997444	0.194166	0.27893	6.29418	6.29492	6.44852	6.14059	6.57547	6.01289	6.32156	6.26828	1.00051	1.23793	0.838619	1.19366
12855191	XM_002686783	PNPLA8	chr4	0.832922	0.194334	0.402299	5.76475	5.82163	5.61349	5.97289	5.69917	5.83032	5.52781	6.11545	1.04022	0.779492	0.888004	1.21852
12900172	NM_001075643	CDC40	chr9	0.389355	0.194529	0.841211	7.55136	7.67175	7.51944	7.70367	7.44539	7.65733	7.59348	7.75001	1.08703	0.880116	1.1081	1.06635
12856701	NM_001044721	CS	chr5	0.405962	0.194547	0.439666	10.415	10.5114	10.5397	10.3867	10.5363	10.2938	10.5432	10.4797	1.06912	1.11186	1.00479	1.13758
12691523	NM_001206853	SAMD4A	chr10	0.282595	0.194636	0.446566	7.26057	7.44687	7.46712	7.24031	7.3086	7.21254	7.62565	7.26809	1.13784	1.17024	1.24578	1.03926
12856479	NR_030902	MIR677	chr5	0.433015	0.194638	0.647659	8.46723	8.74543	8.84045	8.37221	8.7819	8.15255	8.899	8.59186	1.21268	1.38343	1.08455	1.35595
12813952	XM_002697893	CLEC16A	chr25	0.538108	0.194661	0.946328	6.1968	6.29075	6.14271	6.34485	6.10084	6.29276	6.18458	6.39693	1.06729	0.869264	1.05976	1.07487
12803210	NM_001191462	ZBTB9	chr23	0.35342	0.194693	0.857175	8.12294	7.96985	8.1548	7.93799	8.2167	8.02918	8.09291	7.8468	0.899321	1.16216	0.917771	0.881243
12851936	NM_001076391	FKBP14	chr4	0.635409	0.19479	0.145266	5.14226	5.31229	4.98925	5.4653	5.17355	5.11097	4.80495	5.81963	1.12508	0.718944	0.774533	1.63428
12830417	NM_001014901	RBM14	chr29	0.276685	0.194828	0.53704	7.5715	7.7843	7.80573	7.55006	7.75893	7.38407	7.85253	7.71606	1.15893	1.19389	1.06703	1.25875
12791683	NM_176610	MFGE8	chr21	0.345752	0.194877	0.12993	9.73304	9.64719	9.74989	9.63034	9.86335	9.60273	9.63643	9.65796	0.942233	1.0864	0.85446	1.03902
12740926	NM_001034725	DUSP10	chr16	0.165577	0.194911	0.767811	5.76264	5.15307	5.74165	5.17406	6.10943	5.41585	5.37387	4.93228	0.655395	1.48204	0.600587	0.715204
12832307	XM_002699080	NAV2	chr29	0.839905	0.194918	0.835129	6.36154	6.38612	6.4548	6.29286	6.45517	6.2679	6.45443	6.31781	1.01718	1.11879	0.999484	1.0352
12678565	ENSBTAT00000018917	CCT8	chr1	0.199082	0.195332	0.571682	8.69502	8.50132	8.50046	8.69588	8.63906	8.75098	8.36187	8.64077	0.874362	0.873322	0.825197	0.926456
12749769	ENSBTAT00000024745	PSENEN	chr18	0.141391	0.195473	0.0482612	10.18	10.3927	10.3792	10.1935	10.4199	9.94012	10.3386	10.4468	1.15886	1.13741	0.945212	1.42079
12885421	NM_001035299	C7H5orf15	chr7	0.0375983	0.195504	0.40149	7.9071	8.19135	8.13392	7.96453	8.04583	7.76837	8.22202	8.16069	1.21778	1.12458	1.12989	1.3125
12908347	NM_001075700	RAP2C	chrX	0.513321	0.1956	0.104156	5.454	5.15463	5.60672	5.0019	6.14219	4.76581	5.07126	5.238	0.812607	1.52079	0.476014	1.38721
12812769	NM_001192432	RRN3	chr25	0.346259	0.195601	0.479377	7.09395	7.27665	7.31244	7.05816	7.15292	7.03498	7.47197	7.08134	1.13501	1.19274	1.24751	1.03265
12783507	XM_002685540	FZD5	chr2	0.403109	0.195662	0.245939	5.312	5.45643	5.49777	5.27066	5.32428	5.29972	5.67127	5.2416	1.1053	1.17049	1.2719	0.960517
12705763	NM_001077922	RHOB	chr11	0.817847	0.195797	0.987531	6.38654	6.41127	6.3276	6.4702	6.3144	6.45867	6.34081	6.48173	1.01729	0.905886	1.01847	1.01611
12896870	NM_001199026	SNX9	chr9	0.252788	0.195855	0.545613	7.90829	7.73456	7.92025	7.72259	7.96191	7.85466	7.8786	7.59052	0.88655	1.14684	0.943891	0.832693
12872906	XM_002688473	LOC100299905	chr6	0.938647	0.195907	0.419589	6.46897	6.4555	6.34599	6.57848	6.28137	6.65657	6.41061	6.50039	0.990708	0.851164	1.09372	0.897399
12707471	NM_001192259	GCC2	chr11	0.236846	0.195958	0.86437	7.32827	7.43954	7.32282	7.445	7.27504	7.38151	7.37059	7.50849	1.08018	0.918797	1.06848	1.09201
12858180	NM_001075269	AAAS	chr5	0.644021	0.196006	0.270677	7.18168	7.10601	7.03544	7.25225	6.98162	7.38174	7.08926	7.12275	0.9489	0.860468	1.07747	0.835671
12851530	NM_001034662	PSMA2	chr4	0.11774	0.196167	0.0879253	7.39901	7.69553	7.42632	7.66822	7.44103	7.357	7.41161	7.97944	1.22817	0.845631	0.979811	1.53948
12683672	NM_001113745	DNAJC13	chr1	0.143484	0.196374	0.0289873	7.79599	7.92462	7.80394	7.91667	7.63933	7.95264	7.96855	7.8807	1.09326	0.924837	1.25633	0.951357
12806872	NM_001105008	SUPT3H	chr23	0.886186	0.196585	0.156551	5.59919	5.65283	5.37749	5.87453	5.62484	5.57353	5.13013	6.17553	1.03788	0.708557	0.709703	1.51782
12813920	XM_866176	LOC614614	chr25	0.490771	0.196743	0.795331	5.23478	5.35551	5.17986	5.41043	5.14207	5.32749	5.21765	5.49337	1.08728	0.852295	1.05378	1.12185
12791646	ENSBTAT00000006139	WARS	chr21	0.0973583	0.19678	0.352956	8.4336	8.73871	8.46947	8.70284	8.3998	8.46741	8.53914	8.93828	1.23551	0.850641	1.1014	1.38594
12685501	NM_001083457	ABCF3	chr1	0.92522	0.197161	0.319236	7.50756	7.49344	7.40088	7.60012	7.33184	7.68329	7.46993	7.51696	0.990262	0.871007	1.10045	0.89111
[truncated: 7,934 more rows]

## Sheet: Genes affected by sex
Probeset ID	Gene Accession	Gene Symbol	Chromosome	P value sex	Fold Fem-Male
12906419	NM_001145757	EIF1AY	chrY	4.78262e-05	0.100026		Note: This tab lists all genes in which there was a main effect of sex (P<0.05). Those genes in which the fold-change for female/male was < 0.66 are marked in green while those where the fold change for female/male > 1.5 are marked in pink.
12910493	NM_001172595	DDX3Y	chrY	8.97113e-06	0.114018
12906425	ENSBTAT00000063826	UTY	chrY	0.000523467	0.385584
12847425	NM_001037469	H2B	chr3	0.0336493	0.534698
12760151	NM_001083534	ZNF583	chr18	0.0388108	0.535686
12701930	XM_002691271	KIAA1841	chr11	0.00185156	0.541929
12691488	NM_001081737	CASC4	chr10	0.000563393	0.543545
12760122	XM_001256097	LOC789309	chr18	0.0112205	0.556732
12783701	BC149721	TYW5	chr2	0.0261162	0.573691
12733016	NM_001205572	FAM168A	chr15	0.000400912	0.582339
12721594	ENSBTAT00000021510	NPBWR1	chr14	0.035189	0.585394
12773820	NM_001105654	TMEM234	chr2	0.0233118	0.598125
12841178	NM_001040580	ING5	chr3	0.00896522	0.602928
12741155	NM_001080320	TATDN3	chr16	0.0481716	0.603351
12759413	NM_001206280	KLK5	chr18	0.0364761	0.605728
12711745	NM_001205739	EBPL	chr12	0.0447859	0.606638
12885519	NM_001035315	SAR1B	chr7	0.00407814	0.613313
12708721	ENSBTAT00000007466	UBAC2	chr12	0.0133219	0.618169
12804010	NM_001105643	H2B	chr23	0.036085	0.619038
12709498	NM_001098939	VPS36	chr12	0.0428462	0.627171
12817378	NM_001205938	PMS2	chr25	0.00621852	0.631656
12846824	NM_001081608	DEM1	chr3	0.047382	0.634539
12697339	XM_002691111	EFCAB11	chr10	0.00932012	0.635262
12821410	NM_001040475	RBP4	chr26	0.0304013	0.637596
12723435	NM_001076318	TMEM65	chr14	0.0307936	0.638705
12693638	NM_001166523	MTFMT	chr10	0.0293077	0.639969
12743852	XM_615615	SH3D19	chr17	0.0401497	0.64591
12887933	NM_001040600	FBXL12	chr7	0.0191436	0.646962
12832183	NM_001103252	ZNF740	chr29	0.0288427	0.650074
12879012	NM_001040525	SLC26A2	chr7	0.0176821	0.651506
12894025	NM_001077937	ZBTB5	chr8	0.00274268	0.653098
12684153	NM_001101067	UBA5	chr1	0.0141173	0.653599
12875218	NM_001034634	RAB28	chr6	0.00415793	0.655563
12892274	NR_031369	MIRLET7D	chr8	0.038731	0.657801
12892374	XM_002689482	LOC100295263	chr8	0.00415432	0.660537
12741467	NM_001080356	METTL18	chr16	0.0447029	0.665193
12820483	NM_001206896	CUTC	chr26	0.0226283	0.667152
12686816	NM_001191337	TP63	chr1	0.0203474	0.668265
12784569	NM_001098156	ABCB6	chr2	0.00235824	0.668956
12805585	NM_001192368	DSP	chr23	0.00411888	0.671358
12706802	NM_001206209	CCDC88A	chr11	0.0184223	0.673108
12899051	XM_002690169	FAXC	chr9	0.0226681	0.673244
12794939	NM_001100318	C22H3orf62	chr22	0.0130195	0.673313
12866116	NM_001075713	MYL6B	chr5	0.0347171	0.675421
12746988	NM_001192610	PPTC7	chr17	0.00319895	0.676178
12718194	ENSBTAT00000022964	ACBD5	chr13	0.00112994	0.679825
12846956	NM_001099100	POGK	chr3	0.0326827	0.680471
12694790	ENSBTAT00000023186 // ENSBTAT00000023186	LOC100296774 // CDO1	chr10	0.0332248	0.687955
12731643	NM_001075431	LIN7C	chr15	0.00303653	0.688426
12812060	NM_001080903	RFC2	chr25	0.0244557	0.689058
12895985	NM_001206857	PTAR1	chr8	0.0431268	0.689341
12823988	NM_001098027	SGK196	chr27	0.0145184	0.689944
12862594	ENSBTAT00000037671	DNAL4	chr5	0.0464783	0.690772
12868043	NM_001099107	MDM2	chr5	0.021766	0.693057
12864801	ENSBTAT00000026875	C5H12orf10	chr5	0.0100806	0.693449
12717920	ENSBTAT00000006947	ADA	chr13	0.022237	0.694557
12800859	NM_001105479	RRP36	chr23	0.0222486	0.697003
12736974	NM_001102222	DARS2	chr16	0.0185232	0.697772
12746166	NM_001015559	PHF17	chr17	0.00990089	0.698761
12840869	NM_001113242	ERI3	chr3	0.0386164	0.701828
12802096	NM_001101093	KCTD20	chr23	0.0192764	0.705487
12809788	ENSBTAT00000048179	IMPACT	chr24	0.0160598	0.706582
12853555	ENSBTAT00000033491	SLC37A3	chr4	0.0287349	0.707457
12792342	BT026180	SETD3	chr21	0.00733486	0.707751
12757346	NM_001083434	AKT1S1	chr18	0.0175167	0.709472
12855480	BC148929	DMTF1	chr4	0.0239851	0.711717
12826622	NM_001077994	FAM149B1	chr28	0.0243295	0.713939
12852384	NM_001082472	CCDC126	chr4	0.00342958	0.714463
12696472	NM_001195019	ANP32A	chr10	0.0252633	0.716441
12871178	NM_001101096	NUDT9	chr6	0.0463791	0.716584
12754353	NM_001077094	CYTH2	chr18	0.0196979	0.716841
12825006	NM_001192992	FAT1	chr27	0.0228737	0.7175
12890007	NM_001192260	FSD1L	chr8	0.0448633	0.722298
12788328	NM_001099137	SRD5A1	chr20	0.0414016	0.723434
12748128	ENSBTAT00000023779	ZMAT5	chr17	0.0144962	0.725393
12751848	NM_001083688	NOL3	chr18	0.0320264	0.725523
12706740	NM_001076889	NRBP1	chr11	0.038789	0.725624
12830237	NM_001034371	FOXRED1	chr29	0.0351706	0.726994
12685545	NM_001105403	IFT57	chr1	0.0419756	0.727482
12742772	NM_001193101	GIT2	chr17	0.0138954	0.727633
12838226	NM_001083679	SMG5	chr3	0.00693387	0.729929
12761166	NM_174671	SLC25A11	chr19	0.0425079	0.732815
12757427	NM_001046227	MGC137708	chr18	0.0366752	0.735458
12790674	NM_001099074	FBXO22	chr21	0.0181246	0.735734
12860018	ENSBTAT00000026418	TAB1	chr5	0.0432921	0.736109
12863381	XM_002687909	LOC100138973	chr5	0.00530838	0.736554
12847098	XM_002686232	CCDC18	chr3	0.0114401	0.739458
12877926	NM_001101871	EPS15L1	chr7	0.0172255	0.739983
12854964	NM_001034591	ZC3HC1	chr4	0.0249853	0.740036
12787220	NM_001192218	DNAJC21	chr20	0.00688566	0.742035
12816560	NM_001192346	WBSCR16	chr25	0.0152509	0.742843
12769391	NM_001075457	CHMP6	chr19	0.0316617	0.744017
12782904	NM_001083722	RPS6KA1	chr2	0.0142337	0.744263
12690350	NM_001256581	ARID4A	chr10	0.04509	0.744378
12837617	BC149429	DCAF8	chr3	0.028279	0.746115
12828466	NM_001017946	DNAJB12	chr28	0.020875	0.747064
12772488	ENSBTAT00000026451	SMURF2	chr19	0.0336019	0.747661
12805084	NM_001034276	TAF11	chr23	0.041668	0.748628
12900853	BC133427	C9H6orf162	chr9	0.0282229	0.748919
12826135	BC146161	C28H10orf35	chr28	0.0449436	0.749093
12846750	XM_618406	PTGFRN	chr3	0.0232306	0.749777
12895626	NM_001078153	CDC26	chr8	0.0389023	0.749863
12696647	ENSBTAT00000028515	DCAF11	chr10	0.0334809	0.750386
12808817	NM_001080360	KCTD1	chr24	0.00145034	0.75043
12693777	NM_001045877	BMP4	chr10	0.0160614	0.750698
12869693	ENSBTAT00000065725	LOC100336936	chr6	0.0400813	0.751894
12884862	BC111346	FAM114A2	chr7	0.0299073	0.752608
12772286	ENSBTAT00000026738	LLGL2	chr19	0.0442527	0.754428
12844912	NM_001192426	PPOX	chr3	0.00848141	0.756357
12821842	NM_001035060	SFXN4	chr26	0.0399082	0.756775
12874611	NM_001077971	GRSF1	chr6	0.000675323	0.757045
12788277	BC151769	MARVELD2	chr20	0.0239362	0.757117
12879396	NM_001193018	GIPC1	chr7	0.0140657	0.75858
12699636	NM_001103091	LTBP1	chr11	0.0440314	0.758992
12680307	NM_001034463	C1H21orf33	chr1	0.0295796	0.759687
12765985	XM_002695699	LOC786095	chr19	0.0249443	0.760236
12763319	NM_001192395	MRPL10	chr19	0.0393799	0.761712
12740874	NM_001098121	TRMT1L	chr16	0.00575417	0.763104
12743008	XM_002694632	DEPDC5	chr17	0.0118961	0.763437
12684912	ENSBTAT00000065808	LOC518139	chr1	0.0151946	0.764606
12806154	NM_001192735	ALDH5A1	chr23	0.0431704	0.764837
12849569	NM_001101854	RBM48	chr4	0.000773821	0.766083
12877974	NM_001034272	C7H1orf35	chr7	0.00543096	0.766242
12772810	NM_001038579	SKA2	chr19	0.0471446	0.766265
12709257	NM_001075277	PSPC1	chr12	0.0030968	0.766293
12728405	ENSBTAT00000024789	CWF19L2	chr15	0.0385056	0.766708
12716361	ENSBTAT00000024348	SEC23B	chr13	0.0085584	0.766995
12855544	NM_001046483	WDR91	chr4	0.0136198	0.767523
12881643	NM_001035454	MRPL22	chr7	0.0463119	0.768494
12739643	ENSBTAT00000024915	DDI2	chr16	0.0286539	0.769277
12682937	XM_002685064	LOC100295034	chr1	0.0151981	0.769282
12841721	XM_001252714	KIAA0319L	chr3	0.0199191	0.769322
12787792	NM_001101128	UTP15	chr20	0.0317699	0.769555
12694398	NM_001024509	PSME1	chr10	0.00423656	0.769806
12899873	NM_001038052	PHF10	chr9	0.0233618	0.772031
12735081	ENSBTAT00000021109	UBE2J2	chr16	0.0028914	0.772945
12877920	NM_001098888	MED26	chr7	0.0016634	0.773864
12883851	NM_001082602	DDX41	chr7	0.0486467	0.773871
12682512	ENSBTAT00000014796	FAM162A	chr1	0.0121181	0.773874
12723962	NM_001037623	POLR2K	chr14	0.0417334	0.77439
12883887	NM_001045917	DBN1	chr7	0.00356167	0.775222
12898092	XM_002690294	UTRN	chr9	0.0162082	0.776233
12803331	NM_001076204	RDBP	chr23	0.0122144	0.776947
12753417	NM_001098102	SETD6	chr18	0.00161916	0.777106
12771020	NM_001192556	RASL10B	chr19	0.0206558	0.778304
12891218	NM_001204995	DNAJC25	chr8	0.0065026	0.778306
12821398	NM_177502	GOT1	chr26	0.0207902	0.77831
12792539	NM_001192386	GSC	chr21	0.000269491	0.778583
12796682	NM_001076141	CTNNB1	chr22	0.00425936	0.779939
12798151	NM_001102480	TMEM43	chr22	0.0128601	0.781183
12744115	NM_001101204	DGCR8	chr17	0.0255481	0.782455
12850767	NM_001083453	VPS41	chr4	0.037543	0.782844
12788410	ENSBTAT00000064971	CEP72	chr20	0.0379946	0.782868
12861154	NM_001035408	GGA1	chr5	0.0432164	0.783585
12839635	NM_001101139	USP33	chr3	0.0175535	0.78606
12799543	ENSBTAT00000061439	SLMAP	chr22	0.0253329	0.787619
12815439	NM_001075174	CLN3	chr25	0.0399402	0.788015
12766882	ENSBTAT00000027078 // ENSBTAT00000027078	LOC100336833 // AP2B1	chr19	0.0120282	0.788148
12884486	ENSBTAT00000008128	SPC24	chr7	0.00341783	0.788491
12739608	NM_001046193	ATF3	chr16	0.0475462	0.789162
12777221	NM_001035361	RBMS1	chr2	0.045844	0.789242
12721107	NM_001077019	OGFR	chr13	0.0219215	0.790516
12704487	NM_001192096	CAMSAP1	chr11	0.000678193	0.79171
12882589	NM_001105481	RAB8A	chr7	0.0075999	0.792152
12831157	NM_001102093	C29H11orf2	chr29	0.00968315	0.794003
12721978	NM_001075188	TONSL	chr14	0.019135	0.794117
12684946	NM_001080281	SNX4	chr1	0.020305	0.794483
12832960	NM_001040494	EED	chr29	0.0354931	0.794712
12795267	NM_001101076	RUVBL1	chr22	0.0404739	0.795062
12678593	NM_001040473	GART	chr1	0.0282614	0.795837
12833833	NM_001034512	PUS3	chr29	0.0465178	0.797248
12756020	ENSBTAT00000027497	NOB1	chr18	0.0477806	0.79793
12890580	XM_598421	CNTRL	chr8	0.028817	0.79867
12814335	NM_001193188	GFER	chr25	0.0278477	0.799326
12781910	NM_001205493	ZAK	chr2	0.0105693	0.800345
12793067	XM_002696571	IQGAP1	chr21	0.00596897	0.80044
12830323	BC149759	TNFRSF10A	chr29	0.0343685	0.801262
12762367	ENSBTAT00000010716	MAP3K3	chr19	0.0294785	0.803972
12720350	NM_001192772	ESF1	chr13	0.0351575	0.805108
12847295	NM_001046530	CCDC76	chr3	0.0332032	0.805765
12718593	NM_001075264	ARFGAP1	chr13	0.0362396	0.80731
12770482	NM_001034493	ICT1	chr19	0.0469877	0.808863
12786060	XM_002696374	C20H5orf42	chr20	0.00929053	0.809188
12813017	NM_001101104	AMDHD2	chr25	0.0414639	0.809246
12722586	NM_001076865	TERF1	chr14	0.029333	0.809867
12816068	NM_001045996	MRPL28	chr25	0.0426302	0.810387
12710062	NM_001034580	KIAA1704	chr12	0.0400682	0.810464
12858932	NM_001037594	CDK4	chr5	0.0347973	0.810942
12686370	NM_001101197	PSMD2	chr1	0.0381273	0.811038
12770131	ENSBTAT00000015560	SAP30BP	chr19	0.0386352	0.811882
12833118	ENSBTAT00000012489	WDR74	chr29	0.0426639	0.811959
12706870	ENSBTAT00000024864	SLC4A1AP	chr11	0.0238687	0.814006
12805618	NM_001040527	MRPL2	chr23	0.0232887	0.814201
12694064	BC134750	SPG11	chr10	0.0237826	0.814303
12731727	NM_001243290	USP47	chr15	0.0349894	0.815078
12834965	NM_001206245	HNRNPUL2	chr29	0.0309419	0.815717
12849380	ENSBTAT00000014154	SND1	chr4	0.0073972	0.816677
12776937	NM_001046256	MTMR9	chr2	0.0209293	0.816947
12855087	NM_001046380	TRA2A	chr4	0.00604415	0.817703
12869707	ENSBTAT00000055276 // ENSBTAT00000055276	LOC100337062 // PTPN13	chr6	0.0174513	0.817844
12770638	ENSBTAT00000022212	PTRH2	chr19	0.0359089	0.817882
12759194	NM_001080318	PEPD	chr18	0.0101386	0.819117
12781628	NM_001105370	LOC515042	chr2	0.00175856	0.819627
12786589	NM_001193092	BRD9	chr20	0.0396349	0.819814
12694248	NM_001037320	SORD	chr10	0.0111922	0.821059
12762096	NM_001206261	RASD1	chr19	0.0335335	0.823088
12715473	BC134711	CALML5	chr13	0.0160356	0.823338
12736448	NM_001099947	ZC3H11A	chr16	0.0187211	0.82347
12869162	ENSBTAT00000014034	LOC783807	chr5	0.0189494	0.823634
12753447	NM_001104994	THAP11	chr18	0.0451274	0.824038
12720275	ENSBTAT00000028803	TASP1	chr13	0.0207911	0.826736
12687517	NM_001109808	AP1G2	chr10	0.0359005	0.828037
12709536	NM_001083416	EFHA1	chr12	0.0152424	0.8284
12835559	---	---	chr3	0.0160564	0.830962
12788655	NM_001242585	PNN	chr21	0.0105151	0.831774
12684080	NM_001035055	CLDN11	chr1	0.0107988	0.831947
12879700	NM_001102072	AKAP8	chr7	0.0370463	0.833359
12811954	NM_001098897	PAQR4	chr25	0.0353953	0.834695
12754748	ENSBTAT00000028741 // ENSBTAT00000028741	PLEKHG4 // PLEKHG4	chr18	0.0147174	0.835759
12849983	ENSBTAT00000064324	ABCB8	chr4	0.0363031	0.835952
12716280	NM_001192810	EPC1	chr13	0.0460142	0.837345
12718044	ENSBTAT00000023246	GNAS	chr13	0.0151699	0.837388
12837160	NM_001075306	ANP32E	chr3	0.0477121	0.837702
12820472	NM_001076902	FAM45A	chr26	0.0468814	0.83955
12843655	NM_001083383	NUDT17	chr3	0.0261586	0.839571
12732462	NM_001192605	MRE11A	chr15	0.0403294	0.840308
12867080	NM_001105406	WASH1	chr5	0.0242338	0.840493
12740074	---	---	chr16	0.0284881	0.841261
12751655	NM_001102012	TBC1D17	chr18	0.0463535	0.842071
12816513	NM_001034428	ASL	chr25	0.0252014	0.842102
12694690	XM_592093	WDR36	chr10	0.0436617	0.844402
12833176	NM_001037588	UBXN1	chr29	0.0190636	0.844936
12865887	NM_001101993	DDX17	chr5	0.00747915	0.845677
12807175	XM_002697352	MUC21	chr23	0.0488935	0.846149
12895045	BC147885	LOC539818	chr8	0.0321213	0.846558
12813847	ENSBTAT00000056997	FBXL19	chr25	0.0336415	0.847901
12820806	XM_003584083	HELLS	chr26	0.0189973	0.853032
12757226	NM_001077919	BCNT2	chr18	0.0393839	0.853881
12784597	NM_001109807	PPIG	chr2	0.0241452	0.854215
12883341	NM_174711	CSNK1A1	chr7	0.0175293	0.855612
12789126	NM_175808	CPSF2	chr21	0.0376906	0.859347
12802165	NM_001046216	RNF8	chr23	0.0190735	0.859468
12861575	NM_001076116	FAM60A	chr5	0.0116594	0.861134
12855916	ENSBTAT00000013799	PODXL	chr4	0.0398558	0.861584
12850474	NM_001130931	NUP205	chr4	0.0461256	0.861744
12893230	NM_001101069	IARS	chr8	0.0427975	0.862089
12877278	ENSBTAT00000014552 // ENSBTAT00000014552 // ENSBTAT00000014552	LOC100335621 // LOC782238 // HINT1	chr7	0.0357082	0.862627
12864163	ENSBTAT00000012570	ATP2B1	chr5	0.0440697	0.864319
12878231	ENSBTAT00000028682	DDX46	chr7	0.0118592	0.864837
12801691	NM_001101936	KIFC1	chr23	0.0404626	0.866551
12781477	NM_001075607	NUDC	chr2	0.0208736	0.869639
12733180	NM_001105630	NUP160	chr15	0.0478881	0.871175
12714464	NM_001035272	SRSF6	chr13	0.0265221	0.872162
12737294	NM_001083770	C16H1orf95	chr16	0.0424132	0.873828
12831313	NM_001103271	SF3B2	chr29	0.0269186	0.873919
12876477	NM_001256554	SAFB2	chr7	0.0346491	0.874371
12758768	ENSBTAT00000064364	LOC538483	chr18	0.0219078	0.876576
12887281	BC102792	BRD8	chr7	0.0334304	0.879897
12776770	ENSBTAT00000055538	MCM6	chr2	0.0151769	0.880603
12690566	NM_001046361	PAPD4	chr10	0.0475002	0.882125
12823362	XM_003587951	LOC100138651	chr27	0.0475426	0.883645
12779964	NM_001205491	MARCH4	chr2	0.00857095	0.884978
12774310	NM_173889	AK2	chr2	0.0340573	0.885386
12721773	NM_174814	YWHAZ	chr14	0.0220045	0.886293
12832914	ENSBTAT00000026258	PC	chr29	0.0261196	0.887312
12794153	NM_001191367	PRKAR2A	chr22	0.0150223	0.887645
12786213	XM_002696401	ZFR	chr20	0.0201752	0.88868
12688979	NM_001166302	ZC3H14	chr10	0.0130664	0.889242
12877903	NM_001105338	RARS	chr7	0.012119	0.89029
12841469	NM_001206291	SFPQ	chr3	0.0107393	0.890321
12795590	NM_001034468	QARS	chr22	0.00293118	0.890656
12766503	NM_001038073	AARSD1	chr19	0.00192788	0.894086
12865309	NM_001101926	ST13	chr5	0.0332502	0.894272
12724226	NM_174141	PENK	chr14	0.0204905	0.894483
12750457	NM_001015543	RPL13	chr18	0.0189041	0.895842
12817854	ENSBTAT00000023384	EIF3CL	chr25	0.00075612	0.898845
12850270	NM_001037466	SSBP1	chr4	0.0147185	0.89933
12684800	NM_001083694	SON	chr1	0.0433203	0.902337
12897943	NM_001192790	SENP6	chr9	0.0294008	0.908178
12783509	ENSBTAT00000053398	UBXN10	chr2	0.0159426	0.908921
12890512	NM_001100381	SLC31A1	chr8	0.0189719	0.909171
12880575	NM_001037611	G3BP1	chr7	0.0309418	0.911602
12734902	NM_001034206	SOAT1	chr16	0.0319969	0.925353
12838342	NM_001098025	CSDE1	chr3	0.00426181	0.926714
12744348	NM_001191138	ELF2	chr17	0.0258246	0.927276
12698445	NM_174130	ODC1	chr11	0.00188115	0.928948
12697375	ENSBTAT00000005527	SYNDIG1L	chr10	0.0450419	0.932172
12832705	NM_001040487	EEF1G	chr29	0.0419143	0.940697
12875145	NM_001083725	HNRPDL	chr6	0.0388443	0.940907
12780595	NM_001206660	NCL	chr2	0.0394468	0.941493
12718839	NM_001206504	RBM39	chr13	0.00115696	0.945605
12754311	NM_001076998	RPL13A	chr18	0.0106508	0.948695
12801255	NM_001033614	RPS18	chr23	0.0255194	0.950676
12883492	NM_001033619	RPL18A	chr7	0.0336435	0.957863
12903510	NM_001034316	RPL36A	chrX	0.00795347	1.07564
12903682	NM_001025329	EIF1AX	chrX	0.011316	1.07887
12865365	NM_001101072	C5H12orf35	chr5	0.0338517	1.08733
12872617	NM_001077001	RBPJ	chr6	0.0301297	1.10281
12903008	NM_174760	RPL10	chrX	0.000548314	1.11136
12910565	ENSBTAT00000036769 // ENSBTAT00000036769 // ENSBTAT00000036769 // ENSBTAT00000036769 // ENSBTAT00000036769	LOC785061 // LOC783372 // LOC781894 // LOC781580 // LOC614449	chrX	0.00662805	1.1149
12698041	---	---	chr11	0.010924	1.11534
12902845	NM_001034035	HPRT1	chrX	0.0302057	1.12687
12799796	NM_001206543	CAND2	chr22	0.0341757	1.12837
12702167	NM_001114156	SPTAN1	chr11	0.0337508	1.1318
12715372	NM_001081721	TCF15	chr13	0.0419393	1.13226
12797019	ENSBTAT00000030766	RYBP	chr22	0.0293958	1.13412
12884097	NM_001075314	RNF126	chr7	0.0236526	1.13443
12903280	NM_001205555	XPNPEP2	chrX	0.0234456	1.13654
12709414	NM_001038064	GTF2F2	chr12	0.0445752	1.14005
12724180	NM_173997	ARFGEF1	chr14	0.037876	1.14193
12741692	ENSBTAT00000053293 // ENSBTAT00000053293 // ENSBTAT00000053293 // ENSBTAT00000053293 // ENSBTAT00000053293	LOC100335194 // LOC100301462 // COX7B // LOC100297586 // LOC100295347	chr17	0.0269746	1.14452
12887101	NM_001105417	CLINT1	chr7	0.0224762	1.14799
12906510	XM_003588199	LOC520372	chrX	0.0244629	1.14877
12707162	NM_001206104	STRN	chr11	0.0343803	1.14886
12826998	NM_001192980	SIRT1	chr28	0.0368705	1.14987
12774529	ENSBTAT00000022375	FABP3	chr2	0.00926291	1.15249
12797616	NM_001142967	ATG7	chr22	0.0440358	1.15836
12876544	ENSBTAT00000053293 // ENSBTAT00000053293 // ENSBTAT00000053293 // ENSBTAT00000053293 // ENSBTAT00000053293	LOC100335194 // LOC100301462 // COX7B // LOC100297586 // LOC100295347	chr7	0.000626955	1.16032
12907898	NM_001192962	DDX3X	chrX	0.014466	1.16041
12751793	ENSBTAT00000007652	CCDC61	chr18	0.018698	1.16335
12746728	ENSBTAT00000016102	LARP1B	chr17	0.0349204	1.16401
12895983	ENSBTAT00000063361	LOC784731	chr8	0.00618105	1.16574
12712008	BC126640	PAN3	chr12	0.0326471	1.16594
12804528	---	---	chr23	0.0274669	1.16602
12703161	NM_001191410	GTF3C5	chr11	0.0345672	1.16706
12772785	ENSBTAT00000028387	RSAD1	chr19	0.0380736	1.17016
12694781	XM_871774	DUOXA2	chr10	0.0428617	1.17347
12829238	---	---	chr29	0.0406818	1.17571
12808001	BC118484	RALBP1	chr24	0.0215631	1.17778
12812413	ENSBTAT00000013207	DNAJA3	chr25	0.0173124	1.17935
12821736	NM_001205581	ATAD1	chr26	0.0233009	1.1812
12881821	NM_001205534	CAMSAP3	chr7	0.0194785	1.18121
12903267	NM_001038503	SSR4	chrX	0.000976701	1.18291
12884038	NM_001075301	TMEM59L	chr7	0.0370106	1.18299
12877550	NM_001038030	SGTA	chr7	0.0472567	1.18453
12698971	NM_001193017	ZAP70	chr11	0.0157048	1.18911
12772695	NM_001102282	CORO6	chr19	0.0241109	1.1931
12756343	NM_001075224	PPP1R13L	chr18	0.034665	1.19345
12683135	ENSBTAT00000020266	LOC100337136	chr1	0.0172404	1.19354
12848415	NM_001191332	ARMC10	chr4	0.049012	1.19588
12907295	NM_001113231	TMSB4	chrX	0.0028848	1.19719
12765996	ENSBTAT00000055247	HIC1	chr19	0.0461208	1.20469
12793233	XM_002696583	BLM	chr21	0.0417903	1.20912
12837363	NM_001046002	CD48	chr3	0.0214249	1.21197
12906453	NM_001105455	RPL39	chrX	1.75651e-05	1.21622
12688149	NM_174705	ARPP19	chr10	0.00122506	1.21763
12910077	NM_001076309	FAM3A	chrX	0.0376262	1.22347
12812382	NM_001077422	HBA	chr25	0.0263998	1.22584
12908402	BC151770	TXLNG	chrX	0.0338134	1.22948
12870571	NM_001097991	PITX2	chr6	0.0465994	1.23039
12907524	NM_001098886	HCCS	chrX	0.0247566	1.23328
12908222	NM_001083680	PCSK1N	chrX	0.0087278	1.23571
12902960	NM_174659	SLC25A5	chrX	0.00125904	1.23594
12727296	ENSBTAT00000027334	FAM160A2	chr15	0.0413257	1.23834
12891600	NM_001046491	MOB3B	chr8	0.0418235	1.23848
12909948	NM_001076245	UPRT	chrX	0.0240041	1.23975
12907197	NM_174338	FUNDC2	chrX	0.0407121	1.24101
12905385	XM_002699510	CUL4B	chrX	0.0218826	1.24184
12908183	ENSBTAT00000015793	HCFC1	chrX	0.00482954	1.24286
12907333	NM_001033620	NDUFB11	chrX	4.15726e-05	1.24421
12910359	NM_001105455	RPL39	chrX	3.13639e-05	1.24451
12854021	NM_001083677	GIMAP1	chr4	0.0412088	1.24503
12869006	NM_001102325	ATF7IP	chr5	0.0110065	1.24538
12854626	BC123558	MTERF	chr4	0.0450244	1.24549
12904006	XM_002699982	ATRX	chrX	0.0049576	1.24687
12841527	NM_001101275	ITLN2	chr3	0.0291385	1.25018
12770083	NM_001046148	PSMD11	chr19	0.0077438	1.25184
12906113	NM_001191544	BCOR	chrX	0.0211206	1.25236
12720185	NM_001192680	SPATA2	chr13	0.0302874	1.25557
12845704	ENSBTAT00000020250	EIF2C4	chr3	0.0389197	1.2578
12837170	NM_001101882	INPP5D	chr3	0.0121127	1.2579
12907269	ENSBTAT00000023619	SMC1A	chrX	0.0454223	1.25919
12909607	NM_001206105	KIF4A	chrX	0.00151735	1.25921
12901845	NM_001113231	TMSB4	chrU_7180001786367	0.0137029	1.26145
12904044	NM_001038109	TSPAN6	chrX	0.0208199	1.26219
12799315	---	---	chr22	0.0341769	1.26305
12781450	NM_001080269	PQLC2	chr2	0.0293808	1.26322
12681607	BC110223	C1H21orf59	chr1	0.021252	1.26329
12880985	NM_001033763	DNAJB1	chr7	0.0295173	1.26428
12815709	NM_001076808	SPNS1	chr25	0.0153258	1.26477
12798378	ENSBTAT00000006494	SEC61A1	chr22	0.00164455	1.26555
12908136	NM_001046117	EIF2S3	chrX	0.0155979	1.26557
12907613	NM_001034299	PGK1	chrX	0.012412	1.26566
12765561	NM_001035489	MRPL38	chr19	0.0262625	1.26668
12731272	ENSBTAT00000017195	IFT46	chr15	0.0341458	1.26776
12904656	NM_001034560	ACOT9	chrX	0.0252269	1.2687
12786390	NM_001109802	PRKAA1	chr20	0.0395905	1.27026
12908880	NM_001105395	DKC1	chrX	0.000150883	1.27054
12907714	NM_001038516	VBP1	chrX	0.00577019	1.2716
12819469	NM_001101943	SHOC2	chr26	0.0375954	1.27202
12789186	NM_001014982	NDN	chr21	0.0419629	1.27323
12905607	NM_001081616	VMA21	chrX	0.0248273	1.27334
12907767	NM_001034348	SYAP1	chrX	0.0371255	1.27355
12764421	NM_001103279	C19H17orf48	chr19	0.0137066	1.27458
12797841	XM_002696869	ULK4	chr22	0.0143742	1.27575
12909544	BC151816	ACSL4	chrX	0.0167567	1.27693
12812929	NM_001205874	CRAMP1L	chr25	0.010733	1.27703
12779317	NM_001034790	STMN1	chr2	0.0268202	1.27711
12884149	NM_001097996	CDC25C	chr7	0.0447131	1.27738
12906479	NM_001242584	IGBP1	chrX	0.0493437	1.27787
12766728	XM_002695599	LOC100297075	chr19	0.0310115	1.27797
12766709	ENSBTAT00000064066	C19H17orf96	chr19	0.0378531	1.27892
12825708	XM_003585154	ADO	chr28	0.00673244	1.28104
12905621	NM_001076285	HMGB3	chrX	0.00932371	1.28329
12726388	NM_001145035	C15H11orf96	chr15	0.0182332	1.28522
12909125	NM_001098070	OGT	chrX	0.00024456	1.28663
12795525	NM_001035295	RAD18	chr22	0.0380797	1.28685
12844014	NM_001075432	ALG6	chr3	0.020723	1.28743
12752709	NM_001205993	BCL3	chr18	0.049485	1.29065
12908327	NM_001034480	TIMM8A	chrX	0.00860778	1.29229
12904714	NM_001113244	LAMP2	chrX	0.000119335	1.29245
12881157	NM_001206374	TRMT1	chr7	0.0198136	1.29431
12890108	NM_001046100	ZCCHC7	chr8	0.0455889	1.29434
12905630	NM_001101226	CDK16	chrX	0.0145821	1.29552
12886113	ENSBTAT00000000317	RUFY1	chr7	0.0394506	1.29775
12776426	ENSBTAT00000038024	SERINC2	chr2	0.0268635	1.2997
12895062	NM_001037616	HMGB2	chr8	0.000329941	1.29975
12856944	NM_174274	DNAJC14	chr5	0.0169261	1.30236
12748752	ENSBTAT00000032517	ZFP90	chr18	0.00236386	1.30414
12910154	NM_001046554	NONO	chrX	0.00629186	1.30502
12906046	XM_001251062	LAGE3	chrX	0.0277225	1.30512
12903714	NM_001035097	TSR2	chrX	0.0104435	1.30683
12814086	NM_001206327	TNFRSF12A	chr25	0.0130665	1.30867
12900982	NM_001206087	PPIL4	chr9	0.0469259	1.30961
12908657	NM_001205878	MED12	chrX	0.00654574	1.31291
12909745	NM_001076151	WDR45	chrX	6.4881e-05	1.31351
12874334	NM_001082437	COX18	chr6	0.0324642	1.31418
12813350	NM_001205967	ATF7IP2	chr25	0.0276405	1.31455
12800235	ENSBTAT00000022233	KIAA1143	chr22	0.00913754	1.31576
12836516	NM_001034223	FHL3	chr3	0.0237746	1.3166
12891826	XM_002689673	KIAA1045	chr8	0.0170877	1.31928
12879603	NM_001101107	FARSA	chr7	0.00414777	1.31965
12730126	NM_001078102	DNAJC24	chr15	0.0101325	1.31992
12820459	NM_001083723	NHLRC2	chr26	0.0327216	1.32062
12825536	BC104581	PPAPDC1B	chr27	0.00314918	1.32185
12773833	BC102833	MGC127538	chr2	0.0066129	1.32341
12908490	NM_001046223	RENBP	chrX	0.00598416	1.32367
12715099	NM_001046175	MAP1LC3A	chr13	0.0336604	1.32523
12765919	NM_001191186	HOXB9	chr19	0.0205673	1.32534
12907350	NM_001101046	PDHA1	chrX	0.0332082	1.32638
12754444	NM_001243331	CPNE2	chr18	0.0295806	1.3265
12802194	NM_001098993	GGNBP1	chr23	0.00178243	1.32653
12902832	NM_174064	GDI1	chrX	0.022172	1.32716
12903920	ENSBTAT00000017618	HDAC6	chrX	0.00247918	1.3304
12907005	ENSBTAT00000010165 // ENSBTAT00000010165	ZFY // ZFX	chrX	0.0376483	1.33069
12813124	ENSBTAT00000021549	ZNF394	chr25	0.010825	1.33142
12888968	ENSBTAT00000003573	LOC100337045	chr8	0.0143249	1.33202
12909970	NM_001192852	ATP7A	chrX	0.00897673	1.33249
12908026	NM_001110004	HUWE1	chrX	0.00023863	1.33268
12729666	NM_001101210	SLC35C1	chr15	0.035178	1.33326
12823120	ENSBTAT00000023684	BNIP3	chr26	0.0458945	1.33467
12815923	NM_001035045	FSCN1	chr25	0.025644	1.33786
12905745	NM_001206237	FAM199X	chrX	0.019229	1.34047
12753001	NM_001101153	ZNF274	chr18	0.00640898	1.34128
12789412	NM_001100303	GLRX5	chr21	0.00473577	1.34159
12678862	NR_001576	TERC	chr1	0.0391382	1.34395
12852744	NR_030875	MIR1843	chr4	0.0467653	1.34717
12909914	NM_001192740	MBNL3	chrX	0.0205688	1.34854
12908375	NM_001193106	GRIPAP1	chrX	0.0331505	1.34874
12903123	NM_203363	PLP2	chrX	0.0314926	1.35132
12905164	NM_001034638	RBBP7	chrX	1.52457e-05	1.35156
12731936	NM_001193062	ARHGAP1	chr15	0.0401003	1.35193
12907313	NM_176640	SLC35A2	chrX	0.00321823	1.35204
12902527	ENSBTAT00000063923	CCNB3	chrX	0.0190651	1.35316
12902513	NM_001244318	MAGT1	chrX	0.00609266	1.35364
12903475	NM_001034307	GNL3L	chrX	5.23282e-05	1.35403
12902939	NM_174611	SLC6A8	chrX	4.90512e-05	1.35471
12687880	NM_173891	BRB	chr10	0.0232595	1.35497
12718011	ENSBTAT00000021569	TGM2	chr13	0.0213068	1.35546
12837546	BC109610	C3H1orf52	chr3	0.0271414	1.35549
12717939	NM_173995	ATRN	chr13	0.014869	1.35692
12888223	NM_001098473	B3GNT3	chr7	0.0429177	1.35748
12721048	NM_001099170	TMX4	chr13	0.0314135	1.35895
12789156	ENSBTAT00000005307	SERPINA5	chr21	0.0437946	1.35954
12906243	NM_001099202	CT47B1	chrX	0.0170464	1.36467
12909899	NM_001046477	MSN	chrX	0.00237145	1.36555
12906573	NR_031127	MIR105B	chrX	0.010483	1.36674
12908955	NM_001192637	OFD1	chrX	0.0356127	1.36681
12908277	NM_001034471	GDPD2	chrX	0.00154497	1.36831
12909257	NM_001014941	BCAP31	chrX	0.000467284	1.37033
12869004	NM_175798	CD38	chr5	0.0254555	1.37077
12898982	BC102833	MGC127538	chr9	2.87573e-05	1.37151
12908168	NM_001046125	MAGED1	chrX	0.00708445	1.37158
12908013	NM_001035103	ALAS2	chrX	0.0091821	1.37234
12699959	NM_001075667	SLC27A4	chr11	0.0108284	1.37355
12906369	NM_001105657	PIN4	chrX	0.00769594	1.37416
12752266	ENSBTAT00000055496	RELB	chr18	0.0337383	1.375
12807029	NM_001191144	KCNK5	chr23	0.0181104	1.37677
12907545	ENSBTAT00000064329	MAP7D3	chrX	0.00101177	1.37886
12840345	NM_001192906	DOCK7	chr3	0.0265469	1.3805
12683511	ENSBTAT00000055450	CD47	chr1	0.0336367	1.38247
12907627	NM_001206697	THOC2	chrX	0.009318	1.38385
12907438	BC102059	CXHXorf56	chrX	0.00410197	1.38442
12904934	NM_001076016	CCDC22	chrX	0.017646	1.38482
12907190	NM_174334	HSD17B10	chrX	0.00127675	1.38542
12782160	BC149932	GTF3C3	chr2	0.0148976	1.38688
12908645	NM_001075811	TFE3	chrX	0.00811596	1.3872
12903190	XM_002700082	CLCN5	chrX	0.0065476	1.38797
12702649	---	---	chr11	0.0266899	1.38854
12747918	NM_001034727	XBP1	chr17	0.0493569	1.38985
12907132	NM_174185	KDM5C	chrX	0.00236237	1.3905
12907204	NM_174433	PRDX4	chrX	0.0112229	1.39055
12836630	ENSBTAT00000009896	ADAR	chr3	0.0146367	1.39131
12833369	ENSBTAT00000050603	MGC139603	chr29	0.0147111	1.39192
12723454	NM_001076327	RGS20	chr14	0.0494415	1.39874
12905773	NM_001205416	STAG2	chrX	4.56568e-05	1.39888
12907940	NM_001101934	PDK3	chrX	0.00979254	1.40059
12903372	ENSBTAT00000066094	PRKX	chrX	0.0220246	1.4006
12909733	NM_001205638	OTUD5	chrX	0.00179196	1.40115
12735935	NM_001205865	SRGAP2	chr16	0.00787592	1.40126
12909324	NM_001206065	POLA1	chrX	0.00957948	1.40162
12688364	NM_001075151	SLC7A7	chr10	0.0310088	1.4028
12898392	NM_001191540	STXBP5	chr9	0.0415401	1.40298
12680540	ENSBTAT00000032404	CRYBG3	chr1	0.032798	1.40498
12903604	NM_001034363	RBM3	chrX	0.00776961	1.40513
12904893	NM_001192783	ABCB7	chrX	0.0455409	1.40526
12793059	NM_001046331	SNX6	chr21	0.0463158	1.40704
12687070	NM_001076975	IL10RB	chr1	0.045288	1.40786
12905500	NM_001076231	HDAC8	chrX	0.000608663	1.40824
12908826	NM_001038137	MOSPD1	chrX	0.00209171	1.40831
12905755	BC150024	CXHXorf38	chrX	0.032662	1.40856
12691778	XM_002690533	C10H15orf60	chr10	0.0223235	1.40881
12909582	NM_001193252	GPKOW	chrX	0.000598596	1.41099
12905830	NM_001035482	NSDHL	chrX	0.0222136	1.41319
12903846	NM_001102494	CENPI	chrX	0.0028741	1.41426
12700080	NM_001102497	B3GNT2	chr11	0.000212418	1.41477
12884018	NM_001193256	PEX11G	chr7	9.69791e-05	1.41969
12759360	ENSBTAT00000021704	COTL1	chr18	0.0326223	1.41972
12891606	NM_001206038	DAPK1	chr8	0.00638033	1.42156
12796738	NM_001076226	LHFPL4	chr22	0.043496	1.42239
12863567	XM_002684144	LOC100297468	chr5	0.0017265	1.42657
12772834	NM_001076407	RNFT1	chr19	0.0238329	1.43071
12902320	---	---	chrX	0.0164484	1.43434
12874570	NM_001099035	GSTCD	chr6	0.00588323	1.43587
12909707	NM_001099084	MORF4L2	chrX	2.62673e-05	1.43658
12903951	NM_001075639	APOO	chrX	0.00595336	1.43749
12816376	NM_001166607	C25H7orf59	chr25	0.00958554	1.43862
12834190	NM_001035348	TMEM135	chr29	0.0447232	1.4391
12909185	---	---	chrX	0.00130508	1.44037
12904974	XM_614337	BRWD3	chrX	0.000381429	1.44049
12817967	NM_001038172	PGP	chr25	0.0230445	1.44455
12907565	XM_001787392	USP9X	chrX	0.000110945	1.44587
12884731	NM_001206319	CRTC1	chr7	0.0363736	1.44589
12906193	XM_002699810	LOC786285	chrX	0.0306526	1.44597
12909391	NM_001046406	PSMD10	chrX	0.00691879	1.4506
12907479	NM_001075236	GK	chrX	0.00154318	1.45213
12903495	NM_001076815	LAS1L	chrX	0.000338361	1.45246
12696829	NM_001076199	NPTN	chr10	0.00776974	1.45262
12902260	XM_003584350	PIGA	chrX	0.0296216	1.45475
12903059	ENSBTAT00000016073	ATP6AP1	chrX	0.000482848	1.45756
12903657	NM_001075484	MPP1	chrX	0.0136554	1.45762
12786613	NM_001076417	ERGIC1	chr20	0.0208476	1.45871
12908212	NM_001098022	ATP6AP2	chrX	0.0047496	1.45976
12904916	NM_001035403	RP2	chrX	0.0270182	1.46844
12857869	NM_001038035	FAM118A	chr5	0.0332878	1.46956
12839347	NM_001192651	WLS	chr3	0.0330421	1.46974
12907392	NM_001192029	ELF4	chrX	0.00134683	1.47114
12904211	NM_001075731	GEMIN8	chrX	0.0294132	1.47612
12808655	NM_001101239	GRP	chr24	0.0164265	1.47942
12910088	NM_001076313	IDH3G	chrX	0.00928973	1.48128
12832033	NM_001076521	PHLDA2	chr29	0.0135879	1.48263
12906978	NM_001206575	KDM6A	chrX	0.000213539	1.48387
12910278	NM_001076411	UPF3B	chrX	0.0268077	1.48917
12859605	NM_001083435	BIN2	chr5	0.0337977	1.48925
12709777	NM_001192942	RAP2A	chr12	0.0318834	1.48941
12902425	XM_002700117	LOC100297779	chrX	0.00392905	1.49068
12902981	NM_001102477	UBA1	chrX	0.000275655	1.49136
12907703	NM_001038515	CETN2	chrX	0.0239298	1.49226
12905075	ENSBTAT00000024296	OCRL	chrX	0.0140223	1.5016
12904682	NM_001207031	MED14	chrX	0.000832525	1.50457
12904144	NM_001034496	FAM50A	chrX	0.000455614	1.50655
12889215	NM_001034043	GULO	chr8	0.0162503	1.51108
12742101	ENSBTAT00000003355	GLTP	chr17	0.0212471	1.51123
12909928	NM_001046488	TIMM17B	chrX	0.00830594	1.51329
12769776	NM_001075546	SLC43A2	chr19	0.00101091	1.51417
12910573	XM_003584317	TAF1	chrX	4.51324e-05	1.52076
12905059	NM_001046389	PQBP1	chrX	0.018998	1.52133
12910408	XM_002700035	LOC781112	chrX	0.00138931	1.52147
12845601	ENSBTAT00000065314	MANEAL	chr3	0.0180936	1.52534
12904502	NM_001075850	WDR13	chrX	0.000556888	1.52536
12908353	NM_001192404	MSL3	chrX	0.00352191	1.53306
12907364	ENSBTAT00000025754	IL13RA1	chrX	0.0138677	1.53391
12723136	NM_001034619	ANKRD46	chr14	0.0380625	1.5346
12910342	NM_001101277	FOXO4	chrX	0.0263889	1.53581
12905763	NM_001040591	AP1S2	chrX	0.00363132	1.53837
12854397	NM_001099704	ORC5	chr4	0.00358056	1.53998
12903024	ENSBTAT00000024883	WDR44	chrX	0.000258181	1.54064
12904529	NM_001031762	TMEM164	chrX	0.00166863	1.54362
12777008	NM_001031760	SLC38A11	chr2	0.00233278	1.54399
12905512	NM_001110084	DMD	chrX	0.0296209	1.54493
12905819	NM_001081544	LDOC1	chrX	0.00241648	1.54654
12908456	NM_001192435	L1CAM	chrX	0.00464878	1.54887
12862136	NM_001206069	ZDHHC17	chr5	0.0354328	1.55035
12902461	XM_002683867	LOC100299005	chrX	1.83434e-06	1.55252
12904135	ENSBTAT00000017091	PDZD11	chrX	0.00652122	1.5599
12710115	NM_001080296	CLYBL	chr12	0.0167907	1.5608
12904263	NM_001077934	FTSJ1	chrX	0.00387826	1.56515
12910364	NM_001077034	BEX2	chrX	0.0465979	1.56799
12910742	NM_001083794	FAM122B	chrX	0.01538	1.5782
12909023	XM_002699575	ATP11C	chrX	3.72079e-05	1.57892
12904449	NM_001105458	RNF219	chrX	0.00884737	1.58033
12910390	NM_001077116	TCEAL8	chrX	0.00311243	1.58367
12905287	NM_001080308	USP11	chrX	0.000753052	1.58633
12910733	NM_001191236	ELK1	chrX	0.00372557	1.5882
12778566	NM_001192303	CNR2	chr2	0.00302146	1.58887
12843266	NM_001192050	EFCAB7	chr3	0.0298708	1.59111
12908991	NM_001034561	ZDHHC9	chrX	2.17876e-05	1.59112
12889977	XM_586808	DCAF10	chr8	0.0270902	1.59123
12890349	NM_001205811	ZNF462	chr8	0.00821131	1.5948
12905482	NM_001014964	ARAF	chrX	0.00439121	1.60253
12910322	NM_001079630	MMGT1	chrX	0.00314091	1.60652
12910332	XM_002699749	LOC618023	chrX	0.00556528	1.60817
12903690	NM_001098937	RPS6KA3	chrX	0.00599315	1.60845
12905566	NM_001102262	FMR1NB	chrX	0.0169255	1.61006
12910124	NM_001078043	ZNF75D	chrX	0.00945912	1.61595
12705690	ENSBTAT00000018443	TMEM141	chr11	0.000117403	1.62416
12902966	NM_174685	CSTF2	chrX	8.228e-05	1.63363
12704518	NM_001101878	PQLC3	chr11	0.0207446	1.63696
12905449	NM_001205799	KLHL15	chrX	0.0284503	1.6419
12907514	NM_001035031	APOOL	chrX	0.00806126	1.64417
12904359	NM_001103257	SNX12	chrX	0.0206539	1.64764
12902909	NM_174471	TIMP1	chrX	0.00115386	1.65809
12906065	---	---	chrX	0.00486586	1.66118
12905466	NM_001101208	PORCN	chrX	0.00418141	1.66731
12889007	NM_173902	CLU	chr8	0.0155765	1.68027
12903047	NM_001075133	PGRMC1	chrX	0.0176673	1.68731
12754960	BC123585	ZNF829	chr18	0.0417919	1.70043
12838832	NM_001205867	RIMS3	chr3	0.00391161	1.70178
12910487	BC149657	LOC782892	chrX	0.00664269	1.72375
12902894	ENSBTAT00000010033	IL2RG	chrX	0.0489512	1.73439
12908007	NM_001075538	RAB9A	chrX	0.0147123	1.74591
12775963	NM_001046035	FUCA1	chr2	0.00303038	1.75141
12910670	ENSBTAT00000026492	ZNF280C	chrX	0.0100208	1.76469
12904842	NM_001101146	SLC9A6	chrX	0.0217738	1.77592
12829208	XM_003584975	SVIP	chr29	0.00534848	1.79696
12902214	NM_001163777	NGFRAP1	chrX	0.0397898	1.8139
12904406	NM_001193249	ZMYM3	chrX	0.00015976	1.81507
12793341	NM_001101164	EGLN3	chr21	0.0269922	1.82326
12907375	NM_001007807	RNF113A	chrX	0.00345501	1.82388
12909194	NM_001075981	MBTPS2	chrX	0.0017761	1.83071
12692025	BC122820	LOC616348	chr10	0.02567	1.86014
12688130	NM_001014386	RNASE1	chr10	0.000487077	1.86429
12904828	NM_001205995	WBP5	chrX	0.00178539	1.86949
12907686	NM_001046003	MCTS1	chrX	0.00374762	1.88204
12901571	NM_001168608	ULBP21	chr9	0.00390122	1.88862
12765990	XM_002695632	CCL1	chr19	0.00213829	1.89426
12905372	NM_001205682	UBQLN2	chrX	6.38221e-05	1.9009
12783878	NM_001076235	MED18	chr2	0.0212774	1.91601
12822786	NM_001038167	UBE2D1	chr26	0.00527452	1.96269
12902874	NM_001205592	XIAP	chrX	0.00262098	2.05181
12905574	NM_001101220	DYNLT3	chrX	0.00428531	2.08084
12906927	XM_002699838	TBC1D8B	chrX	0.00879941	2.08171
12904355	XM_002699831	LOC520706	chrX	0.00446171	2.13284
12903795	NM_001015577	APEX2	chrX	0.000409847	2.15357
12902782	---	---	chrX	0.0493867	2.15462
12905770	---	---	chrX	0.0456541	2.26387
12910704	ENSBTAT00000064378 // ENSBTAT00000064378 // ENSBTAT00000064378 // ENSBTAT00000064378	LOC617729 // LOC787716 // LOC786550 // LOC786530	chrX	0.000338315	2.32264
12906365	NM_001105656	LOC100126054	chrX	0.0453602	2.35957
12906467	XM_003585409	LOC100850685	chrX	0.0192224	2.37858
12730785	NM_174242	APOA1	chr15	0.000818868	3.24971
12903084	NR_001464	XIST	chrX	6.04554e-05	3.27256
12731239	ENSBTAT00000020999	C15H11orf34	chr15	0.00101951	3.55044

## Sheet: Genes affected by DKK1
Probeset ID	Gene Accession	Gene Symbol	Chromosome	P value treatment	Fold DKK1-Con
12836105	NM_174785	GNG12	chr3	0.0283283	2.03455		Note: This tab lists all genes in which there was a main effect of DKK1 (P<0.05). Those genes in which the fold-change for DKK/control was > 1.5 are marked in tan while those where the fold change for DKK1/control was < 0.66 are marked in blue.
12774048	NR_030952	MIR2358	chr2	0.0187411	2.03388
12857986	NM_001045932	FKBP11	chr5	0.0206096	1.81962
12841186	NM_001076343	SEC22B	chr3	0.026267	1.80436
12689173	XM_002690488	SENP8	chr10	0.0245329	1.79405
12866832	XM_002687711	METTL20	chr5	0.0170515	1.70376
12906257	ENSBTAT00000063302	MAP3K7IP3	chrX	0.00282031	1.6547
12871408	NM_001191517	PACRGL	chr6	0.00686517	1.65126
12847204	NM_001128503	TMEM167B	chr3	0.0175065	1.64305
12777308	NM_001102117	FASTKD2	chr2	0.00511373	1.63208
12848320	XM_002686086	BCL9	chr3	0.038268	1.6061
12846488	NM_001046408	MSTO1	chr3	0.0208321	1.58253
12707867	ENSBTAT00000024516	MRRF	chr11	0.0139038	1.5819
12717004	XM_868000	LOC616039	chr13	0.0459474	1.58057
12704518	NM_001101878	PQLC3	chr11	0.0307763	1.57623
12789630	NM_001098915	KLC1	chr21	0.000243312	1.55743
12895985	NM_001206857	PTAR1	chr8	0.0207854	1.54391
12769448	NM_001075470	TUBD1	chr19	0.0177834	1.52436
12761690	NM_001110064	B9D1	chr19	0.00981891	1.52417
12806544	NM_001103293	MED20	chr23	0.0460528	1.52128
12854454	XM_597790	RAPGEF5	chr4	0.0200096	1.51934
12679288	NM_001080235	TIMMDC1	chr1	0.0197664	1.51222
12679202	NM_001035037	CRYZL1	chr1	0.0135835	1.51118
12692772	NM_001105025	LRR1	chr10	0.0240137	1.50836
12729396	NM_001080305	RHOG	chr15	0.00261594	1.49501
12691488	NM_001081737	CASC4	chr10	0.0130817	1.48693
12755996	ENSBTAT00000043635	RTN2	chr18	0.00169197	1.48551
12839973	NM_001046377	TMED5	chr3	0.0368091	1.48181
12809935	NM_001101112	PSTPIP2	chr24	0.00821152	1.47254
12871795	NM_001206090	SRD5A3	chr6	0.0130275	1.46754
12741105	NM_001083771	CSRP1	chr16	0.0290651	1.46684
12786160	ENSBTAT00000047142	OXCT1	chr20	0.00146315	1.46559
12704506	NM_001037448	C1D	chr11	0.0428903	1.4628
12842770	NM_174537	FCER1G	chr3	0.0455675	1.46017
12891820	BC148025	C8H9orf85	chr8	0.00792939	1.46003
12793853	BC123775	RALGAPA1	chr21	0.0181519	1.45927
12882320	XM_001788522	GALNT10	chr7	0.0148473	1.45798
12822216	NM_001193248	ACTR1A	chr26	0.0181554	1.45393
12714562	NM_001083393	FAM83D	chr13	0.00253102	1.45132
12839222	NM_001205924	SNIP1	chr3	0.0166111	1.4511
12735137	BC149747	SWT1	chr16	0.0266378	1.44994
12862169	NM_001206126	SMCR7L	chr5	0.0240013	1.44801
12713992	NM_206843	ASIP	chr13	0.0152126	1.44782
12696488	NM_001102220	ALKBH1	chr10	0.0306882	1.44771
12894972	NM_001101187	MTMR9	chr8	0.0384548	1.44007
12724025	BC146130	LOC100125316	chr14	0.0252335	1.43583
12833750	NM_001014927	DHCR7	chr29	0.0215609	1.43049
12825536	BC104581	PPAPDC1B	chr27	0.000415504	1.42839
12849698	NM_001206433	TMED4	chr4	0.0489793	1.4278
12693777	NM_001045877	BMP4	chr10	0.00428642	1.42519
12779554	ENSBTAT00000026850	NKAIN1	chr2	0.0448456	1.42227
12755811	NM_174505	ATP6V0D1	chr18	0.0154358	1.41872
12784868	XM_002696309	LOC100298692	chr20	0.0371686	1.41502
12830506	NM_001192338	RHOD	chr29	0.0158297	1.4087
12783710	NM_001192264	TANK	chr2	0.0134653	1.40397
12695051	NM_001077931	SGPP1	chr10	0.0110327	1.40276
12728295	NM_001206303	FAM76B	chr15	0.0494343	1.39793
12845552	NM_001105396	ABCD3	chr3	0.00514879	1.3879
12768445	BC112791	C19H17orf61	chr19	0.00198313	1.38167
12824026	NM_001034490	NEIL3	chr27	0.0258892	1.38015
12681995	NM_001076211	FBXO25	chr1	0.03528	1.37329
12799866	NM_001192819	CCDC66	chr22	0.0186153	1.36716
12710102	XM_002691772	AKAP11	chr12	0.0215914	1.36505
12778566	NM_001192303	CNR2	chr2	0.033936	1.36019
12705470	ENSBTAT00000013869	TRAF2	chr11	0.0437351	1.35318
12903059	ENSBTAT00000016073	ATP6AP1	chrX	0.00316484	1.34924
12788266	NM_001098119	FCHO2	chr20	0.0401061	1.349
12857775	NM_001077845	APOBEC3B	chr5	0.0485738	1.3444
12762696	NM_001075462	IFI35	chr19	0.016936	1.34405
12868120	XM_002687736	ETNK1	chr5	0.00205939	1.34371
12787394	NM_001075600	EXOC3	chr20	0.0342326	1.34157
12867488	NM_001206094	CHKB	chr5	0.0119627	1.33984
12880677	NM_001046387	MRI1	chr7	0.0159935	1.33673
12853733	NM_001075384	ANKMY2	chr4	0.0387192	1.33564
12905745	NM_001206237	FAM199X	chrX	0.0213024	1.33287
12744115	NM_001101204	DGCR8	chr17	0.0109347	1.33207
12768279	ENSBTAT00000021217	GOSR2	chr19	0.0398034	1.32669
12848151	NM_001206870	HOOK1	chr3	0.0109063	1.32648
12753447	NM_001104994	THAP11	chr18	0.00593439	1.32625
12709527	NM_001205720	NDFIP2	chr12	0.0212162	1.3249
12796307	NM_001083461	TMEM115	chr22	0.00827736	1.32424
12870946	NM_001034454	TMEM128	chr6	0.0134381	1.32237
12853704	NM_001083395	ZNF277	chr4	0.0250546	1.31534
12792539	NM_001192386	GSC	chr21	0.000115534	1.31354
12784994	NM_001102163	SLC38A9	chr20	0.0451744	1.31271
12781005	NM_001101913	PLEKHA3	chr2	0.00833753	1.31201
12899089	NM_001083791	SH3BGRL2	chr9	0.0182703	1.3095
12795452	NM_001205740	C22H3orf75	chr22	0.00439955	1.30905
12853987	NM_001080267	KIAA1549	chr4	0.0479339	1.30347
12697156	NM_001083515	TMEM87A	chr10	0.0126777	1.30295
12877851	NM_001038042	ACSL6	chr7	0.0191864	1.3018
12803392	NM_001076237	SLC39A7	chr23	0.00714113	1.30132
12736963	NM_001099085	METTL13	chr16	0.0100527	1.30003
12718095	ENSBTAT00000023060	RASSF2	chr13	0.0379521	1.29853
12881125	NM_001079612	SLC35A4	chr7	0.0406186	1.29819
12793271	XM_003587567	SCAPER	chr21	0.0416881	1.29559
12810916	---	---	chr25	0.0104725	1.29344
12879603	NM_001101107	FARSA	chr7	0.00709092	1.29199
12903951	NM_001075639	APOO	chrX	0.042045	1.28795
12870423	XM_002688058	SEC24D	chr6	0.0489949	1.28779
12873780	NM_001075356	GNPDA2	chr6	0.0167989	1.28414
12718625	BC114017	RALGAPA2	chr13	0.0175807	1.28317
12840786	XM_002686425	TESK2	chr3	0.0340263	1.28183
12680230	BC151785	MORC3	chr1	0.0386496	1.27754
12810581	NM_001192999	DYM	chr24	0.00200211	1.27659
12787195	NM_001192174	SLC30A5	chr20	0.00607421	1.2764
12705711	ENSBTAT00000028967	TGFBRAP1	chr11	0.00835026	1.27633
12871640	ENSBTAT00000014028	OCIAD1	chr6	0.0187763	1.27571
12800690	NM_001191173	ISY1	chr22	0.0265008	1.27565
12864809	NM_001045948	SLC25A17	chr5	0.0365482	1.2749
12765783	ENSBTAT00000045931	GSG2	chr19	0.0293561	1.27331
12800868	NM_001206358	PPP2R5D	chr23	0.0162445	1.26964
12729648	NM_001076216	VPS11	chr15	0.0275164	1.26392
12821078	NM_001082471	BAG3	chr26	0.0371688	1.26388
12765442	NM_001079510	YPEL2	chr19	0.0401227	1.26328
12707414	ENSBTAT00000008372	TUBB4B	chr11	0.0478792	1.26324
12736764	ENSBTAT00000024684	INTS7	chr16	0.0251722	1.25882
12796132	NM_001191397	DALRD3	chr22	0.0368245	1.25734
12678992	NM_001045894	RFC4	chr1	0.0209838	1.25715
12784672	NM_001102333	TCEB3	chr2	0.0475136	1.25549
12686644	NM_001206470	DPPA2	chr1	0.0113133	1.25381
12880589	NM_001192809	ATP13A1	chr7	0.0307262	1.25228
12694181	NM_001031754	LRRC57	chr10	0.0232016	1.25091
12890504	NM_001100376	UBAP1	chr8	0.0222372	1.24991
12678856	ENSBTAT00000028645	NDUFV3	chr1	0.0159785	1.24852
12695304	NM_001205897	UBR1	chr10	0.0311946	1.24827
12744994	XM_001787955	FNIP2	chr17	0.0137724	1.24723
12694827	NM_001205525	DENND4A	chr10	0.0430812	1.24664
12791925	NM_001166559	C21H14orf142	chr21	0.0383531	1.2465
12776414	NM_001075617	IMP4	chr2	0.0208248	1.2457
12855388	ENSBTAT00000008749	RALA	chr4	0.0342899	1.24506
12682147	NM_001206035	XRN1	chr1	0.0398841	1.24365
12884515	NM_001046028	TAF7	chr7	0.00904648	1.24276
12750731	NM_001098921	NUP93	chr18	0.00371793	1.23822
12691311	NM_001102238	METTL3	chr10	0.0185321	1.23313
12709591	XM_590263	FLT3	chr12	0.0427803	1.23237
12812393	NM_001046128	PHKG2	chr25	0.0285486	1.23233
12752434	NM_001102098	ZNF304	chr18	0.030233	1.23232
12856873	NM_175779	M6PR	chr5	0.0420756	1.232
12681848	XM_002685052	STAG1	chr1	0.0195969	1.23172
12716280	NM_001192810	EPC1	chr13	0.0219266	1.23157
12704405	NM_001075257	EPT1	chr11	0.0388899	1.22758
12782012	NM_001192531	CCNT2	chr2	0.0411756	1.22485
12895640	NM_001079794	AQP3	chr8	0.0105983	1.22467
12722586	NM_001076865	TERF1	chr14	0.0354533	1.22438
12744064	NM_001205690	ZCCHC8	chr17	0.0432268	1.22358
12794130	ENSBTAT00000063071	FYCO1	chr22	0.0230877	1.22157
12885421	NM_001035299	C7H5orf15	chr7	0.0375983	1.21778
12877563	NM_001080224	GADD45GIP1	chr7	0.0195179	1.21731
12767860	ENSBTAT00000023522	JUP	chr19	0.00956944	1.21629
12707105	NM_001192872	KDM3A	chr11	0.0108902	1.21348
12861610	NM_001079610	PAN2	chr5	0.0148551	1.21253
12710146	NM_001046370	FAM48A	chr12	0.027319	1.21101
12880912	XM_617648	PTPRS	chr7	0.0302022	1.20985
12727406	BC151797	CUL5	chr15	0.0351402	1.20891
12772695	NM_001102282	CORO6	chr19	0.0171436	1.20742
12735081	ENSBTAT00000021109	UBE2J2	chr16	0.021783	1.20488
12803431	NM_001014966	KLHDC3	chr23	0.034419	1.20382
12813251	NM_001083450	LRCH4	chr25	0.0241288	1.20357
12845344	NM_001075839	MOV10	chr3	0.00840863	1.20186
12720297	NM_001206830	TRPC4AP	chr13	0.0417188	1.20157
12725252	NM_001015594	ARMC1	chr14	0.0417173	1.20139
12828537	NM_001206133	ARID4B	chr28	0.0494326	1.19544
12830008	XM_584352	INCENP	chr29	0.0177636	1.1947
12747307	XM_002694500	ATXN2	chr17	0.040312	1.18537
12690496	ENSBTAT00000066137	TMOD3	chr10	0.0284704	1.18441
12716791	NM_001076241	ABI1	chr13	0.00670571	1.18417
12740634	XM_002693904	PPP1R15B	chr16	0.0188809	1.18407
12793923	ENSBTAT00000052553 // ENSBTAT00000052553	LOC783220 // LOC789328	chr21	0.0453441	1.1808
12895849	NM_001205428	TLN1	chr8	0.0136579	1.17806
12696877	NM_001192766	WDHD1	chr10	0.0232041	1.17571
12764834	NM_001193126	SUPT6H	chr19	0.0205622	1.1726
12689062	ENSBTAT00000003768	LOC511898	chr10	0.0306532	1.17155
12793887	NM_001077518	MBIP	chr21	0.0329619	1.17016
12694248	NM_001037320	SORD	chr10	0.0366118	1.16984
12750642	NM_001075412	TERF2IP	chr18	0.00669988	1.16904
12854492	NM_001206519	LAMB1	chr4	0.0078686	1.16519
12884018	NM_001193256	PEX11G	chr7	0.0394955	1.16483
12891444	ENSBTAT00000031479	HAUS6	chr8	0.0202465	1.16365
12889251	NM_176671	ATP6V1B2	chr8	0.0305217	1.16164
12840721	NM_001038187	ILF2	chr3	0.0418413	1.15891
12832914	ENSBTAT00000026258	PC	chr29	0.0081024	1.15882
12883341	NM_174711	CSNK1A1	chr7	0.0247903	1.15703
12845002	NM_001077933	AK4	chr3	0.018161	1.15634
12833678	NM_001075640	PRPF19	chr29	0.0479305	1.15625
12819148	NM_001075194	ADD3	chr26	0.0254551	1.15489
12721264	ENSBTAT00000016279 // ENSBTAT00000016279 // ENSBTAT00000016279	LOC784446 // LOC783070 // RPL5	chr13	0.0177884	1.15483
12739170	ENSBTAT00000002341	PDPN	chr16	0.0294648	1.15422
12750768	NM_001098924	USP10	chr18	0.0154387	1.15363
12707367	NM_001205598	WDR43	chr11	0.00988482	1.15257
12773837	NM_001205468	ACSL3	chr2	0.00767341	1.15057
12901323	ENSBTAT00000012920	SF3B5	chr9	0.0146299	1.14241
12885748	XM_002688582	KLF2	chr7	0.0131586	1.13462
12709849	NM_001192614	DIAPH3	chr12	0.0355516	1.13395
12771729	NM_001193159	NPEPPS	chr19	0.0382161	1.13003
12714535	ENSBTAT00000000397	ITCH	chr13	0.0221249	1.12541
12787606	BC126680	BDP1	chr20	0.040191	1.12502
12688149	NM_174705	ARPP19	chr10	0.0328661	1.12452
12797019	ENSBTAT00000030766	RYBP	chr22	0.0483357	1.11905
12894334	NM_001034562	HNRNPK	chr8	0.00718158	1.11708
12892597	ENSBTAT00000044356	TXN	chr8	0.0387016	1.1166
12815814	NM_001045951	CARHSP1	chr25	0.0372472	1.10273
12855202	NM_001046409	TAX1BP1	chr4	0.0313996	1.10169
12782792	BC151756	KDM1A	chr2	0.02345	1.09245
12744348	NM_001191138	ELF2	chr17	0.0321041	1.07481
12722051	NM_001025322	EIF3H	chr14	0.0314291	1.06909
12779686	ENSBTAT00000016997 // ENSBTAT00000016997	LOC785758 // SRSF9	chr2	0.0209317	1.0497
12821546	NM_001205310.1	FGFR2	chr26	0.0158788	0.952
12766503	NM_001038073	AARSD1	chr19	0.0299793	0.930529
12837529	NM_001034367	S100A2	chr3	0.0345039	0.917684
12769290	NM_001109980	SLC16A3	chr19	0.0288028	0.908017
12712871	NM_001035467	SAP18	chr12	0.0311482	0.904684
12839317	XM_605806	LOC527415	chr3	0.0400225	0.899454
12770654	NM_001192454	IGF2BP1	chr19	0.0490565	0.895436
12909745	NM_001076151	WDR45	chrX	0.0448509	0.895024
12902115	NM_174660	SLC25A6	chrU_7180002013958	0.0399842	0.890155
12883382	NM_001040485	HTR4	chr7	0.0130324	0.889588
12831786	XM_002703411	C29H11orf75	chr29	0.0417284	0.888649
12729814	ENSBTAT00000043836	SMTNL1	chr15	0.017095	0.888555
12817252	NM_001046277	THUMPD1	chr25	0.0147079	0.888083
12878453	NM_001143862	LSM7	chr7	0.0408275	0.88532
12832078	NM_001077045	SDHAF2	chr29	0.0487594	0.883373
12772732	NM_001076358	PRKAR1A	chr19	0.0309829	0.87811
12774310	NM_173889	AK2	chr2	0.0242349	0.877472
12754112	XM_870502	FFAR1	chr18	0.02881	0.875641
12810784	NM_001102545	KCTD7	chr25	0.0492783	0.87485
12780245	ENSBTAT00000029019	CRYGD	chr2	0.0054299	0.872882
12754235	ENSBTAT00000055556	FIZ1	chr18	0.0412555	0.869375
12779023	NM_001206078	WDR33	chr2	0.0410332	0.868561
12697600	---	---	chr10	0.0343716	0.867186
12746036	NM_001205617	FAM101A	chr17	0.0207169	0.862812
12754748	ENSBTAT00000028741 // ENSBTAT00000028741	PLEKHG4 // PLEKHG4	chr18	0.0370273	0.861312
12692750	---	---	chr10	0.0309126	0.860766
12879394	ENSBTAT00000057213	LOC519492	chr7	0.0449712	0.860229
12703300	NM_001163946	WDR38	chr11	0.0462171	0.859108
12757460	NM_001046230	DDX19B	chr18	0.0451749	0.856065
12858465	NM_001192155	C1RL	chr5	0.0396993	0.855704
12829147	NM_001206964	VSTM5	chr29	0.0226772	0.855271
12722399	NM_001098037	RECQL4	chr14	0.00713243	0.854331
12713044	NM_001077039	MGC134473	chr12	0.0477017	0.853494
12741748	ENSBTAT00000055945	LOC100298963	chr17	0.0243986	0.852356
12766532	NM_001145539	C19H17orf107	chr19	0.00689278	0.850973
12753991	NM_001083780	PTOV1	chr18	0.0491813	0.84798
12877920	NM_001098888	MED26	chr7	0.0269109	0.847467
12876548	XM_002688738	LOC100335404	chr7	0.0163432	0.847358
12754928	---	---	chr18	0.0347098	0.847315
12707493	NM_001205678	SIX2	chr11	0.0300167	0.847202
12806964	NM_001076965	SLC35B2	chr23	0.048634	0.846819
12794366	NM_174347	HYAL2	chr22	0.00823171	0.84623
12741884	ENSBTAT00000031774	LOC100337340	chr17	0.0411457	0.845302
12691225	NM_001130755	SLC22A17	chr10	0.0303676	0.843516
12803360	NM_001033629	DDX39B	chr23	0.0299553	0.843278
12868688	NM_001102319	SUN2	chr5	0.0299607	0.842318
12839010	NM_001206591	NES	chr3	0.0341799	0.841738
12758497	ENSBTAT00000010015	TMED6	chr18	0.0382822	0.841607
12737028	XM_002693879	BTG2	chr16	0.0335588	0.840723
12726324	XM_001788741	FAM180B	chr15	0.0252969	0.839749
12716476	NM_001110804	SRC	chr13	0.0324169	0.83845
12817553	NM_001105400	RHBDF1	chr25	0.0492041	0.835151
12842977	NM_205796	APOA1BP	chr3	0.0315834	0.834845
12835013	XM_003588052	LOC617154	chr29	0.0243078	0.833975
12885973	NM_001205919	NRTN	chr7	0.0448107	0.831984
12883740	NM_001192032	SLC25A42	chr7	0.0261818	0.831437
12714523	NM_001110788	KIF3B	chr13	0.0228364	0.831103
12760305	ENSBTAT00000063022	KDM6B	chr19	0.037719	0.825696
12906534	XM_002700231	LOC100300003	chrX	0.043624	0.825311
12770083	NM_001046148	PSMD11	chr19	0.0190069	0.824879
12718164	NM_001082423	VAPB	chr13	0.0475072	0.824453
12730818	ENSBTAT00000012957	FXYD2	chr15	0.03226	0.823329
12853375	XM_002686979	PRKAG2	chr4	0.0249051	0.823183
12786562	XM_002696342	LOC614206	chr20	0.0107765	0.823005
12876741	NM_173890	AMH	chr7	0.00568555	0.822904
12909810	XM_589673	TEX28	chrX	0.0336392	0.822883
12699692	ENSBTAT00000006430	DCTN1	chr11	0.0201567	0.822671
12814317	ENSBTAT00000037548	MPG	chr25	0.0225254	0.82095
12834876	XM_002699410	EPS8L2	chr29	0.00445184	0.818672
12881955	XM_002689182	ONECUT3	chr7	0.0201705	0.816536
12715372	NM_001081721	TCF15	chr13	0.00217358	0.814746
12819894	NM_001110077	FBXL15	chr26	0.0387561	0.813983
12902966	NM_174685	CSTF2	chrX	0.0424258	0.813126
12843058	NM_001007076	RXFP4	chr3	0.031491	0.812595
12831676	NM_001144087	CCDC85B	chr29	0.0315013	0.810959
12765478	NM_001206247	ANKRD13B	chr19	0.0108774	0.81031
12698233	NR_031089	MIR2294	chr11	0.0186191	0.809663
12770745	NM_001034525	NOL11	chr19	0.0484441	0.807785
12823046	NM_001034760	AVPI1	chr26	0.0328092	0.806947
12841527	NM_001101275	ITLN2	chr3	0.0341626	0.805895
12706268	NM_001076873	BRD3	chr11	0.00893642	0.805611
12891726	NM_001191328	TSSC1	chr8	0.0238278	0.80561
12695717	NM_001103265	C10H14orf21	chr10	0.00283098	0.804468
12743329	XM_002694606	NEFH	chr17	0.0455346	0.803335
12743916	ENSBTAT00000004815	CCDC64	chr17	0.048865	0.802673
12751650	NM_001046178	PPP1R15A	chr18	0.0290812	0.801172
12820993	NM_001101262	MARVELD1	chr26	0.0380341	0.799286
12705521	NM_001075587	CRAT	chr11	0.0334066	0.797505
12885485	ENSBTAT00000054658	GLRX	chr7	0.0195814	0.796873
12718987	ENSBTAT00000022161	SLC2A4RG	chr13	0.0152173	0.794467
12692228	NM_001078156	DIS3L	chr10	0.037074	0.792135
12692761	XR_139147	LOC788997	chr10	0.0293742	0.791967
12771489	NM_001046320	SMTNL2	chr19	0.0156118	0.791155
12897640	NM_001192645	HACE1	chr9	0.0346345	0.790231
12903302	NM_001034241	UTP14A	chrX	0.0493818	0.790142
12743060	XM_002694505	VSIG10	chr17	0.00948517	0.787609
12856550	ENSBTAT00000063193	PIM3	chr5	0.0145233	0.787507
12771219	NM_001033627	BECN1	chr19	0.0309433	0.779718
12890646	NM_001193003	CLCN3	chr8	0.0322713	0.778683
12805611	NM_001015597	NFKBIL1	chr23	0.0380942	0.77559
12861977	XM_002687250	KRT6C	chr5	0.0192101	0.7755
12834851	NM_001046532	RAB3IL1	chr29	0.0153125	0.771841
12746214	NM_001076830	ARHGAP10	chr17	0.046926	0.7716
12909794	NM_001206552	MECP2	chrX	0.0175433	0.769846
12829232	NR_030849	MIR2407	chr29	0.0457325	0.76934
12784753	ENSBTAT00000063688	KIAA1522	chr2	0.0235566	0.768427
12787737	NM_001160157	PAPD7	chr20	0.0263173	0.7676
12812319	NM_001075540	HAGHL	chr25	0.00586322	0.766023
12755265	---	---	chr18	0.0251289	0.763386
12877889	BC153835	JMJD4	chr7	0.0234602	0.76206
12765919	NM_001191186	HOXB9	chr19	0.0236493	0.760264
12791964	ENSBTAT00000001825	NMB	chr21	0.0432699	0.755586
12815458	NM_001015518	DCUN1D3	chr25	0.0136405	0.755298
12785367	ENSBTAT00000018934	MIER3	chr20	0.0443069	0.753117
12854057	NM_001077917	PAXIP1	chr4	0.0276318	0.750759
12770183	NM_001100358	SYNGR2	chr19	0.0419062	0.749679
12688947	NM_001034400	ACTR10	chr10	0.0227773	0.748312
12864136	NM_174562	ITFG2	chr5	0.0482085	0.744217
12771117	NM_001159481	PDK2	chr19	0.0189313	0.743042
12852498	XM_002686666	DLX6	chr4	0.040694	0.742403
12709483	NM_001038066	MTIF3	chr12	0.0138084	0.74035
12771020	NM_001192556	RASL10B	chr19	0.00670964	0.738024
12842299	NM_001191371	GJB4	chr3	0.00804675	0.736457
12868130	XM_612859	PRDM4	chr5	0.0187257	0.735816
12775638	NM_001205608	FAM134A	chr2	0.0205241	0.734627
12891778	NM_001034753	C8H9orf89	chr8	0.0318014	0.733338
12834940	NM_001101255	NUDT8	chr29	0.0256031	0.732346
12894025	NM_001077937	ZBTB5	chr8	0.0197442	0.732002
12831035	NM_001083444	FADS2	chr29	0.0475587	0.730814
12812388	NM_001101958	ZNF48	chr25	0.0362947	0.73001
12708301	NM_001078088	C11H9orf169	chr11	0.017519	0.722045
12753658	NM_001191435	CBFB	chr18	0.00272924	0.719873
12730938	NM_001206910	HYOU1	chr15	0.0121047	0.716184
12753254	ENSBTAT00000009293	BLOC1S3	chr18	0.00241043	0.711349
12746657	NM_001075705	ELMOD2	chr17	0.0209812	0.705452
12706561	NM_001099041	EHMT1	chr11	0.0289382	0.701843
12702793	NM_001083775	C11H2orf68	chr11	0.00399035	0.700393
12742653	ENSBTAT00000045109	SDS	chr17	0.00819687	0.699778
12909790	XM_002700227	XK	chrX	0.0277189	0.694379
12753436	NM_001076184	PAK4	chr18	0.0139792	0.691008
12898611	NM_001076215	HS3ST5	chr9	0.0198686	0.690708
12689601	NM_001193155	TDP1	chr10	0.0404126	0.690467
12748294	XM_001787706	ZNF605	chr17	0.0415078	0.678478
12769391	NM_001075457	CHMP6	chr19	0.00703227	0.678395
12894902	NM_001015667	FBXO8	chr8	0.01629	0.665032
12681617	ENSBTAT00000044136	SLC9A9	chr1	0.0159204	0.66125
12843090	NM_001038023	NIT1	chr3	0.0364187	0.651256
12739466	NM_001103245	EFHD2	chr16	0.0315544	0.623
12773167	ENSBTAT00000031159	RAC3	chr19	0.00737175	0.613697
12891519	NM_001076170	FAM154A	chr8	0.0465794	0.612118
12712877	NM_001193089	RAB20	chr12	0.00982256	0.602685
12806481	NM_001192202	LY6G5B	chr23	0.04269	0.600821
12881652	NM_001206184	FAM174A	chr7	0.00803373	0.592469
12834840	NM_001206150	VPS37C	chr29	0.000482407	0.585888
12842911	NM_175825	GSTM1	chr3	0.00497703	0.572636
12791125	NM_001193042	NUBPL	chr21	0.0141512	0.566389
12786691	XM_003587506	LOC783613	chr20	0.0171285	0.524444
12901148	NM_001103289	PLAGL1	chr9	0.0350471	0.51193
12905561	NM_001076262	TMEM47	chrX	0.00779141	0.398267
12800934	NM_001003900	TUBB2B	chr23	0.0132691	0.225579

## Sheet: Genes affected by interaction
Probeset_ID	Gene Accession	Gene Symbol	Chromosome	P value trt x sex	Fold Fem DKK1 - Fem Con	Fold Male DKK1-Male Con
12842911	NM_175825	GSTM1	chr3	0.00748441	0.339018	0.967241	Note: This tab lists all genes in which there was a DKK1 x sex interaction (P<0.05). Those genes in which the fold-change for DKK/control in females or males was > 1.5 are marked in tan while those where the fold change for DKK1/control was < 0.66 are marked in blue.
12901838	NM_001034793	TMEM18	chrU_7180001786364	0.0117728	0.35195	1.20266
12898542	NM_001205704	RWDD2A	chr9	0.0458219	0.458511	1.71941
12714728	NM_001038085	RPP38	chr13	0.0052113	0.460213	1.5407
12853121	NM_174324	GNAI1	chr4	0.0248134	0.460611	1.09957
12772805	NM_001040587	PYY	chr19	0.0420853	0.471305	1.05312
12839683	NM_001205990	GUCA2A	chr3	0.0145391	0.490185	1.37993
12800901	NM_001145653	C23H6orf141	chr23	0.00313887	0.496541	1.23514
12775638	NM_001205608	FAM134A	chr2	0.00647872	0.504737	1.06922
12770183	NM_001100358	SYNGR2	chr19	0.0117496	0.517625	1.08576
12702793	NM_001083775	C11H2orf68	chr11	0.0136371	0.522116	0.939543
12834259	NM_001245925	PANX1	chr29	0.0338555	0.523586	1.63217
12748083	NM_001076382	MGST2	chr17	0.0317609	0.54184	1.40622
12690089	XM_605853	PAQR5	chr10	0.00458125	0.560598	1.67551
12810130	XM_002697658	ZNF407	chr24	0.00374478	0.564168	1.51031
12766692	BC126776	C19H17orf89	chr19	0.0358876	0.566657	1.18417
12862531	ENSBTAT00000000361	ASB8	chr5	0.0296008	0.571548	1.38383
12771117	NM_001159481	PDK2	chr19	0.0429818	0.578618	0.954191
12860176	ENSBTAT00000011881	TMTC3	chr5	0.00745037	0.587143	1.67483
12889336	NM_001192037	GRHPR	chr8	0.039912	0.587958	1.25519
12795827	NM_001077936	SLC25A20	chr22	0.0271207	0.593601	1.18923
12763478	NM_001038125	DCAF7	chr19	0.00225161	0.594491	1.41054
12754130	NM_001076496	SCN1B	chr18	0.0275961	0.594719	1.57811
12719749	XM_002692417	STX16	chr13	0.0225282	0.597028	1.15541
12825753	ENSBTAT00000064215	LOC100336756	chr28	0.0389932	0.597132	1.35379
12784753	ENSBTAT00000063688	KIAA1522	chr2	0.0364497	0.604286	0.977152
12857424	NM_181668	RHEBL1	chr5	0.0383509	0.604425	1.78147
12848281	NM_001098161	PPIE	chr3	0.0439264	0.60773	1.38619
12906248	XR_083488	LOC100335906	chrX	0.000185008	0.631272	1.69449
12890802	NM_001172227	TESK1	chr8	0.029758	0.631322	1.04707
12833468	NM_001075444	STX5	chr29	0.0464567	0.632562	1.28093
12868324	XM_002687946	PPPDE2	chr5	0.00937209	0.644612	1.44851
12891053	NM_001098076	PPP3CC	chr8	0.0200126	0.652176	1.21289
12796448	NM_001192835	PFKFB4	chr22	0.0426525	0.652276	1.07386
12838856	XM_002686401	SELRC1	chr3	0.0349531	0.659186	1.41354
12801378	NM_001077856	LY6G6C	chr23	0.0261876	0.660082	1.53369
12831708	ENSBTAT00000064628	RAB1B	chr29	0.0227583	0.661149	1.43562
12812007	ENSBTAT00000022073	PIGQ	chr25	0.0127756	0.667678	1.28293
12718194	ENSBTAT00000022964	ACBD5	chr13	0.0107797	0.66848	1.17343
12754440	NM_001082468	PLEKHF1	chr18	0.0049085	0.670254	1.22338
12700059	NM_001035307	EDF1	chr11	0.0313411	0.670886	1.25247
12714031	ENSBTAT00000017725	TBC1D20	chr13	0.00917476	0.672552	1.50342
12834341	NM_001103269	SLC29A2	chr29	0.0343547	0.677091	1.25488
12718157	ENSBTAT00000014966	EIF6	chr13	0.0233612	0.679395	1.21931
12806250	ENSBTAT00000045075	ZNRD1	chr23	0.015007	0.683986	1.30181
12694398	NM_001024509	PSME1	chr10	0.0127276	0.684077	1.06275
12764212	NM_001046316	LGALS3BP	chr19	0.0116947	0.684145	1.23299
12768995	NM_001034343	MRPS7	chr19	0.0252332	0.686336	1.07034
12887668	NM_001034748	TECR	chr7	0.0321945	0.690345	1.46952
12732358	ENSBTAT00000001630	MPZL3	chr15	0.00807094	0.690663	1.46222
12754277	ENSBTAT00000011667	FAM65A	chr18	0.00484363	0.692609	1.31688
12845704	ENSBTAT00000020250	EIF2C4	chr3	0.0467963	0.694137	1.0771
12711330	NM_001083643	NEK3	chr12	0.0470512	0.708271	1.38131
12758020	BC102534	C18H16orf48	chr18	0.0113719	0.711214	1.14272
12755985	NM_176659	NDUFA3	chr18	0.00493605	0.711232	1.38308
12818076	NM_001083746	ZNF689	chr25	0.0170182	0.712504	1.47395
12854949	NM_001038679	MRPL32	chr4	0.0173365	0.713246	1.29531
12850039	ENSBTAT00000012326	ARF5	chr4	0.0120072	0.714504	1.36752
12796301	NM_001075960	CMTM7	chr22	0.00549041	0.715652	1.20293
12821726	NM_001015529	EXOSC1	chr26	0.00744196	0.717491	1.23203
12797434	NM_001102330	DCP1A	chr22	0.029435	0.718947	1.45861
12895540	ENSBTAT00000000956	FBXW2	chr8	0.0434229	0.720303	1.28323
12691161	NM_001083743	TM9SF1	chr10	0.0277644	0.721018	1.12602
12759047	ENSBTAT00000056565	PLLP	chr18	0.0295962	0.724836	1.5335
12877550	NM_001038030	SGTA	chr7	0.00258644	0.726448	1.27393
12900821	XM_002690272	OLIG3	chr9	0.0106918	0.727267	1.7178
12816222	NM_001206722	AGFG2	chr25	0.037093	0.728398	1.41336
12702737	ENSBTAT00000043256	SWI5	chr11	0.0300111	0.728483	1.52355
12745541	NM_176637	ATP6V0A2	chr17	0.0430193	0.733511	1.13851
12859450	ENSBTAT00000002043	NFE2	chr5	0.026534	0.738854	1.06387
12876027	XM_001250588	AASDH	chr6	0.0370565	0.740327	1.59087
12860511	NM_001102106	CCDC77	chr5	0.0201099	0.740455	1.45827
12741927	NM_001033608	MIF	chr17	0.0469664	0.74215	1.31313
12905755	BC150024	CXHXorf38	chrX	0.0309001	0.743171	1.48664
12870262	NM_001166524	TBC1D1	chr6	0.0176458	0.745496	1.26604
12871021	XM_592598	KIAA0232	chr6	0.0291818	0.746611	1.4302
12805669	NM_001075709	TBCC	chr23	0.0179943	0.746971	1.31709
12761288	NM_175819	CACNB1	chr19	0.0402514	0.747958	1.29762
12885141	NM_001038534	RNASEH2A	chr7	0.0428578	0.749198	1.15862
12898807	ENSBTAT00000013464	PCMT1	chr9	0.0153814	0.749204	1.28514
12878280	NM_001046010	WDR83OS	chr7	0.028268	0.752816	1.40657
12876611	ENSBTAT00000063121	AZU1	chr7	0.0231356	0.754336	1.15258
12734493	NM_175777	GNB1	chr16	0.0379773	0.755863	1.19831
12845601	ENSBTAT00000065314	MANEAL	chr3	0.0377503	0.759236	1.56993
12766532	NM_001145539	C19H17orf107	chr19	0.0447937	0.759772	0.953121
12825420	NM_001076085	ACSL1	chr27	0.0286781	0.760607	1.55019
12774310	NM_173889	AK2	chr2	0.0153226	0.76088	1.01193
12776740	NM_001205828	LUZP1	chr2	0.0188628	0.762797	1.5016
12867117	NM_001101151	OBFC2B	chr5	0.0444435	0.762799	1.75684
12751220	BC122585	PPP1R12C	chr18	0.0143561	0.763332	1.05875
12691847	NM_001206190	HAUS4	chr10	0.0193922	0.763734	1.80702
12700051	NM_001035300	TEX261	chr11	0.0368719	0.765393	1.4721
12823923	NM_001037462	LEPROTL1	chr27	0.0137785	0.765486	1.7118
12803497	BC118293	RANBP9	chr23	0.024602	0.765492	1.051
12714592	ENSBTAT00000053246	ERGIC3	chr13	0.0493618	0.765589	1.09214
12811974	NM_001075318	ITFG3	chr25	0.0192161	0.766148	1.31473
12838899	NM_001101106	TADA1	chr3	0.0438396	0.766307	1.34149
12846329	NM_001034598	NFYC	chr3	0.00934426	0.767615	1.3276
12895388	ENSBTAT00000025666	C8H9orf80	chr8	0.0386607	0.767858	1.22084
12705573	NM_001205763	TMEM127	chr11	0.0049883	0.770949	1.29806
12800430	NM_001034767	NICN1	chr22	0.0265914	0.772778	1.55678
12742448	NM_001101927	SLC15A4	chr17	0.0232268	0.773437	1.38519
12818390	NM_001046617	POLR3K	chr25	0.00896295	0.774163	1.29771
12698769	NM_183085	PNO1	chr11	0.0294736	0.775896	1.188
12711034	NR_031039	MIR2302	chr12	0.0447729	0.776465	1.10158
12718593	NM_001075264	ARFGAP1	chr13	0.0471316	0.776793	1.16206
12759973	XM_001255073	LOC787812	chr18	0.0226191	0.776985	1.54513
12858048	BC111682	C5H22orf32	chr5	0.0122881	0.7771	1.21606
12834810	NM_001076270	CDCA5	chr29	0.0452423	0.777686	1.24118
12890725	NM_001034553	PINX1	chr8	0.0377327	0.777831	1.35592
12862637	NM_001076520	TBC1D22A	chr5	0.0343204	0.778515	1.65041
12770437	ENSBTAT00000012301	AMZ2	chr19	0.0362901	0.778853	1.11269
12704020	NM_174583	PPP3R1	chr11	0.0352336	0.779233	1.56124
12882560	NM_001103108	RAVER1	chr7	0.018478	0.77973	1.24329
12729722	NM_001014965	ANKRD49	chr15	0.0335561	0.780275	1.77944
12881807	NM_001128505	MBD3	chr7	0.0314543	0.781551	1.19982
12740339	NM_001190269	MFN2	chr16	0.0129915	0.782391	1.45494
12678244	---	---	chr1	0.0301595	0.783185	1.46106
12900858	NM_001114610	TFB1M	chr9	0.0313193	0.784787	1.3454
12900885	NM_001102164	RMND1	chr9	0.0467858	0.784812	1.56158
12901816	NM_173978	ACP1	chrU_7180001786359	0.0360414	0.785247	1.45328
12834840	NM_001206150	VPS37C	chr29	0.0287523	0.786454	0.436472
12782574	NM_001077981	PMS1	chr2	0.033988	0.786808	1.31889
12847571	NM_001034791	LAMTOR2	chr3	0.023281	0.787067	1.20944
12880456	NM_001192774	CNOT8	chr7	0.0325459	0.790328	1.43522
12890262	XM_591997	LOC514189	chr8	0.0343309	0.790459	1.32679
12831786	XM_002703411	C29H11orf75	chr29	0.048334	0.792907	0.995952
12715724	---	---	chr13	0.0146117	0.796315	1.27541
12881371	NM_001076230	SEPT8	chr7	0.0384688	0.797384	1.43847
12887917	NM_001080328	PCP2	chr7	0.0049756	0.79802	1.31588
12766709	ENSBTAT00000064066	C19H17orf96	chr19	0.0337119	0.798489	1.3229
12722016	NM_001075250	PTK2	chr14	0.00390303	0.799833	1.30958
12795916	NM_001015623	MON1A	chr22	0.00977961	0.801919	1.39291
12840709	NM_001192297	BARHL2	chr3	0.0171981	0.8036	1.11493
12722615	XM_002692571	SLC45A4	chr14	0.0386329	0.804744	1.2394
12811708	ENSBTAT00000049485	TSC2	chr25	0.0321324	0.805222	1.18363
12825708	XM_003585154	ADO	chr28	0.0269967	0.805664	1.18724
12704336	XM_001790496	ZDHHC12	chr11	0.0135551	0.807979	1.50414
12821529	NM_001013602	PAOX	chr26	0.0434704	0.80975	1.15337
12793762	ENSBTAT00000009665	COMMD4	chr21	0.012985	0.811252	1.53572
12718030	NM_174247	BFSP1	chr13	0.0397722	0.814262	1.15264
12746240	NM_001075513	UNG	chr17	0.00592792	0.81525	1.44096
12773136	XM_002696168	FAM100B	chr19	0.00448061	0.815809	1.55789
12754852	XM_002695405	SGK110	chr18	0.0173096	0.817345	1.06391
12843583	NM_001045953	HAX1	chr3	0.0236413	0.820781	1.06798
12841823	XM_001251238	LOC786014	chr3	0.0485837	0.822003	1.11854
12690714	NM_001102179	ZWILCH	chr10	0.0104763	0.822532	1.51439
12862084	NM_001046499	ASUN	chr5	0.0159771	0.822678	1.6831
12831764	NM_001101223	FAM181B	chr29	0.0247217	0.823738	1.30818
12870010	ENSBTAT00000012939	CXCL6	chr6	0.0420698	0.825853	1.378
12883726	NM_001098864	ASNA1	chr7	0.0137096	0.825977	1.41964
12745765	ENSBTAT00000006828	MVK	chr17	0.0408144	0.826813	1.08146
12782511	NM_001075907	WDR12	chr2	0.0377263	0.828917	1.20631
12706195	NM_001040543	SNRPG	chr11	0.0448099	0.83013	1.3097
12681607	BC110223	C1H21orf59	chr1	0.00686339	0.831605	1.46711
12833813	NM_001075712	MTA2	chr29	0.00268924	0.834758	1.21256
12814014	NM_001034784	FIS1	chr25	0.0334329	0.834884	1.15205
12815965	NM_001038053	EIF2AK1	chr25	0.0184812	0.834928	1.51709
12866032	NM_001205372	RBFOX2	chr5	0.0147327	0.836434	1.27888
12726578	NM_001192830	RAB39	chr15	0.0230261	0.838693	1.06295
12875517	NM_001083754	RCHY1	chr6	0.0253524	0.840018	1.26833
12812837	NM_001205360	ERCC4	chr25	0.0204724	0.840418	1.49186
12746380	NM_001192319	SFSWAP	chr17	0.0232939	0.84114	1.21852
12781058	NM_001024507	SESN2	chr2	0.0480037	0.844728	1.25207
12761977	NM_001192116	CEP95	chr19	0.0103933	0.845338	1.23193
12833662	NM_001015589	BSCL2	chr29	0.0214507	0.846287	1.52201
12726242	NM_001098150	PLEKHF2	chr14	0.0370886	0.847679	1.23046
12753711	NM_001037624	NUTF2	chr18	0.0193718	0.84848	1.12501
12884176	NM_001024496	ZNF692	chr7	0.0260803	0.84965	1.23743
12798335	NM_001034224	CNBP	chr22	0.0155998	0.854743	1.2989
12849052	NM_001045869	ATP6V1F	chr4	0.045976	0.855966	1.26749
12750425	NM_001075345	RDH13	chr18	0.0122141	0.858382	1.0524
12849034	NM_174532	DNAJB6	chr4	0.0315366	0.859308	1.18042
12899855	NM_001077869	OOEP	chr9	0.0322704	0.859482	1.96232
12766484	NM_001103332	EME1	chr19	0.0225473	0.859827	1.39146
12721077	ENSBTAT00000043873	UQCC	chr13	0.0175576	0.860312	2.00985
12863934	NM_173999	BTG1	chr5	0.0303347	0.860589	1.29371
12804195	NM_001135578	C23H6orf228	chr23	0.0303441	0.862142	1.20741
12833903	NM_001035320	CDK2AP2	chr29	0.0336024	0.862733	1.81456
12866085	NM_001034484	EIF3D	chr5	0.0320146	0.865473	1.20314
12886908	NM_001046414	CLPP	chr7	0.0202092	0.865745	1.49669
12766503	NM_001038073	AARSD1	chr19	0.0320288	0.866759	0.998992
12814717	NM_001191258	FTSJ2	chr25	0.0398405	0.868299	1.62943
12815770	NM_001075261	ZNF655	chr25	0.0344375	0.86915	1.40605
12836716	NM_001075218	S100A16	chr3	0.031832	0.8694	1.39657
12763019	NM_001038092	C19H17orf49	chr19	0.0354102	0.869447	1.31648
12888119	NM_001079642	SRA1	chr7	0.00322756	0.870967	1.60153
12705952	NM_001191150	SMEK2	chr11	0.0457835	0.871539	1.13351
12719457	NM_001034494	PCNA	chr13	0.0308178	0.872348	1.1835
12718919	ENSBTAT00000022448	C13H20orf111	chr13	0.037607	0.872738	1.33272
12767851	NM_001013603	IFT20	chr19	0.034397	0.876663	1.38285
12852155	NM_001076967	TBRG4	chr4	0.0378045	0.877705	1.15214
12898874	NM_001083516	NDUFAF4	chr9	0.0143906	0.88111	1.5046
12728082	NM_001034507	TMEM9B	chr15	0.0249603	0.881272	1.56311
12827219	NM_001083527	DDX21	chr28	0.0227174	0.881532	1.15712
12686715	NM_001076328	UBE2G2	chr1	0.0440685	0.881555	1.1045
12836876	---	---	chr3	0.00354725	0.883949	1.13679
12721697	NM_001015532	CYHR1	chr14	0.0423402	0.886229	1.28872
12725817	NM_001193002	ESRP1	chr14	0.025229	0.887202	2.01339
12829065	NM_001105040	IRF7	chr29	0.0160272	0.88923	1.40681
12768609	NM_001017937	BAIAP2	chr19	0.0188227	0.892371	1.59719
12864466	NM_001034204	TUBA1C	chr5	0.0420147	0.892974	1.49673
12720558	NM_001192859	ZNF335	chr13	0.0490455	0.895771	1.29287
12842925	NM_176652	NDUFS5	chr3	0.0196527	0.89637	1.14853
12723463	NM_001244111	MGC148714	chr14	0.0490066	0.901644	1.30798
12810003	NM_001192606	PIGN	chr24	0.046076	0.906113	1.55266
12815400	NM_001101841	RNPS1	chr25	0.0440821	0.906951	1.21621
12698536	ENSBTAT00000026209	IL1RN	chr11	0.0372111	0.908418	2.06815
12700664	NM_001034544	EIF2B4	chr11	0.0217864	0.911388	1.21191
12794882	NM_001014862	RPL29	chr22	0.041851	0.912786	1.1542
12868634	NM_001193175	SPATS2	chr5	0.0400926	0.915767	1.81582
12755361	XM_002694751	GINS2	chr18	0.0389028	0.916141	1.5335
12725889	NM_001114155	RB1CC1	chr14	0.00323726	0.916787	1.30152
12694413	NM_001075434	CMTM5	chr10	0.0343869	0.917153	1.89349
12791768	NM_175790	IDH2	chr21	0.0250141	0.917664	1.46585
12707924	NM_001193041	SARDH	chr11	0.0141147	0.918504	1.12398
12753658	NM_001191435	CBFB	chr18	0.017333	0.92108	0.562618
12686760	NM_001076347	PSMG1	chr1	0.00522559	0.921487	1.3368
12818395	NM_001035500	MRPS34	chr25	0.0157583	0.923153	1.60693
12779554	ENSBTAT00000026850	NKAIN1	chr2	0.0168934	0.923761	2.18981
12709414	NM_001038064	GTF2F2	chr12	0.00533798	0.928843	1.36831
12722519	NM_001206620	EEF1D	chr14	0.0398684	0.929743	1.38388
12794535	ENSBTAT00000004892	TKT	chr22	0.0487973	0.930118	1.15848
12704532	NM_001034277	SRSF7	chr11	0.0494602	0.944717	1.11477
12749769	ENSBTAT00000024745	PSENEN	chr18	0.0482612	0.945212	1.42079
12863325	NM_001105493	SCO2	chr5	0.0353364	0.948937	1.51227
12719185	BC120045	C13H20orf43	chr13	0.0330782	0.949722	1.57244
12867545	NM_001076083	PMM1	chr5	0.0428119	0.950253	1.36675
12725721	NM_001034625	RPL8	chr14	0.0338996	0.952586	1.23593
12904168	NM_001034500	EBP	chrX	0.0388608	0.958767	1.81348
12781418	NM_001075581	RPL11	chr2	0.0425524	0.961244	1.08149
12720857	ENSBTAT00000027713	RPS21	chr13	0.0263059	0.968673	1.08666
12811594	NM_205801	CLDN3	chr25	0.0362417	0.968677	1.59732
12718095	ENSBTAT00000023060	RASSF2	chr13	0.0256991	0.977526	1.72495
12731183	NM_001075187	SMPD1	chr15	0.0445639	0.980196	1.3489
12871640	ENSBTAT00000014028	OCIAD1	chr6	0.0131008	0.983767	1.6543
12880912	XM_617648	PTPRS	chr7	0.0208225	0.985256	1.48565
12769370	NM_001034387	NUP85	chr19	0.0439312	0.986305	1.34365
12688506	NM_001192134	CHD8	chr10	0.0415708	0.988337	1.36093
12688149	NM_174705	ARPP19	chr10	0.0237354	0.991831	1.27496
12831676	NM_001144087	CCDC85B	chr29	0.0350466	0.995207	0.660821
12740634	XM_002693904	PPP1R15B	chr16	0.0191581	1.00046	1.40136
12901323	ENSBTAT00000012920	SF3B5	chr9	0.0235322	1.01143	1.29035
12743916	ENSBTAT00000004815	CCDC64	chr17	0.0389946	1.01209	0.636589
12909745	NM_001076151	WDR45	chrX	0.0262098	1.014	0.790004
12853704	NM_001083395	ZNF277	chr4	0.0329665	1.01541	1.70388
12902176	XM_002683987	LOC790181	chrU_7180002026052	0.0488196	1.02015	0.732849
12741105	NM_001083771	CSRP1	chr16	0.0386622	1.02339	2.10244
12772695	NM_001102282	CORO6	chr19	0.0344431	1.02494	1.4224
12866165	ENSBTAT00000015804	CKAP4	chr5	0.0254241	1.02911	0.791557
12692179	NM_001206282	BAHD1	chr10	0.0374509	1.0315	0.4332
12903682	NM_001025329	EIF1AX	chrX	0.048284	1.03417	0.923244
12867488	NM_001206094	CHKB	chr5	0.0239118	1.03564	1.73338
12696488	NM_001102220	ALKBH1	chr10	0.0489302	1.038	2.01912
12880677	NM_001046387	MRI1	chr7	0.0451817	1.05771	1.68935
12830931	NM_001099004	NAA40	chr29	0.0393974	1.06	0.774866
12840595	NM_001046449	SERBP1	chr3	0.0279702	1.0639	0.861227
12691088	BC111294	CCPG1	chr10	0.0405526	1.06586	0.834187
12739472	NM_001101998	ARHGEF16	chr16	0.0406537	1.06838	0.848633
12838342	NM_001098025	CSDE1	chr3	0.0428924	1.07371	0.97094
12868130	XM_612859	PRDM4	chr5	0.00531723	1.07376	0.504232
12681779	ENSBTAT00000000988	AMOTL2	chr1	0.0169739	1.07522	0.763704
12887501	NM_001076254	ETF1	chr7	0.0449698	1.07561	0.953465
12864689	ENSBTAT00000009044	EIF4B	chr5	0.0225775	1.07807	0.92191
12714523	NM_001110788	KIF3B	chr13	0.00271349	1.07813	0.640677
12904974	XM_614337	BRWD3	chrX	0.0414674	1.07973	0.752193
12870876	NM_001193222	PRSS12	chr6	0.0491184	1.08437	0.658749
12805774	XM_594442	RIOK1	chr23	0.0156405	1.08506	0.616519
12755719	ENSBTAT00000020504	CFDP1	chr18	0.0285601	1.08513	0.740674
12809378	NM_001101060	YES1	chr24	0.0295945	1.08859	0.873977
12884519	NM_001046031	JSRP1	chr7	0.044916	1.08876	0.86749
12751960	NM_001034528	TMEM86B	chr18	0.0422975	1.08887	0.76754
12780512	NM_001037444	HDAC1	chr2	0.000809235	1.08933	0.867955
12680597	NM_001206047	PIK3CB	chr1	0.0409625	1.09093	0.860502
12897943	NM_001192790	SENP6	chr9	0.0229441	1.09927	0.897662
12718839	NM_001206504	RBM39	chr13	0.000168319	1.10186	0.959614
12884486	ENSBTAT00000008128	SPC24	chr7	0.0408513	1.10618	0.812936
12750754	NM_001035083	PSMC4	chr18	0.0193136	1.11209	0.878042
12815840	NM_001205599	CCDC64B	chr25	0.038396	1.12306	0.799597
12882192	NM_001080343	ZMAT2	chr7	0.0253665	1.12385	0.699843
12815677	NM_001192078	HIP1	chr25	0.0315617	1.12644	0.832893
12721602	NM_174267	CEBPD	chr14	0.046431	1.12975	0.894012
12682876	NM_001105052	PCYT1A	chr1	0.00278493	1.13132	0.669067
12883543	NM_001105612	CANX	chr7	0.0423755	1.13228	0.99482
12706838	BT021605	TSC1	chr11	0.0388443	1.13241	0.563593
12762156	NM_001205618	RNF157	chr19	0.0382349	1.13299	0.792393
12724511	XM_002692551	LOC506831	chr14	0.0200621	1.13904	0.847879
12833931	NM_001102502	CDC42BPG	chr29	0.038666	1.14041	0.768368
12813411	NM_001205998	GIGYF1	chr25	0.0358148	1.15183	0.734929
12691278	ENSBTAT00000022826	RBM25	chr10	0.00466926	1.15197	0.887911
12866934	XM_003582181	PAWR	chr5	0.00905662	1.15399	0.751962
12835134	XM_002699443	MRGPRG	chr29	0.013534	1.1643	0.801595
12732619	NM_001205970	OSBP	chr15	0.0169533	1.16442	0.801764
12792860	NM_001099030	KLHL28	chr21	0.0344761	1.1678	0.812503
12894805	ENSBTAT00000004032	DENND4C	chr8	0.0379316	1.16792	0.866494
12691776	ENSBTAT00000064449	LOC613752	chr10	0.0425236	1.16938	0.595456
12827943	NM_001034016	TFAM	chr28	0.0175579	1.16949	0.838312
12865508	NM_001192309	DIP2B	chr5	0.0392413	1.17532	0.725694
12846376	NM_001046376	USP21	chr3	0.0358614	1.17576	0.838898
12909424	NM_001206309	AMOT	chrX	0.011641	1.17934	0.482073
12688271	NM_001105613	HMGCR	chr10	0.0385342	1.18214	0.888318
12684800	NM_001083694	SON	chr1	0.0113034	1.18352	0.905239
12767240	ENSBTAT00000023364	ACACA	chr19	0.0229601	1.1857	0.871866
12867608	NM_001083485	AEBP2	chr5	0.0443432	1.1866	0.868804
12895966	NM_001130762	ELP3	chr8	0.00265816	1.18952	0.787734
12847927	ENSBTAT00000007626	LOC781667	chr3	0.0334483	1.18961	0.78477
12684635	NM_001038105	RSPH1	chr1	0.0175582	1.19478	0.761604
12799315	---	---	chr22	0.0479198	1.2	0.779019
12904006	XM_002699982	ATRX	chrX	0.0178537	1.20332	0.841469
12910573	XM_003584317	TAF1	chrX	0.0200084	1.20837	0.817149
12843481	NM_001143860	MACF1	chr3	0.0394475	1.20871	0.934914
12828466	NM_001017946	DNAJB12	chr28	0.0406575	1.2105	0.72917
12679662	ENSBTAT00000063907	RRP1B	chr1	0.0314049	1.21176	0.84955
12878053	---	---	chr7	0.0179975	1.21303	0.75789
12840261	ENSBTAT00000040289	EVI5	chr3	0.00648191	1.21372	0.776313
12904333	NM_001205389	CHM	chrX	0.0494185	1.21465	0.576185
12716602	XM_003582927	LOC539166	chr13	0.0332715	1.21699	0.610803
12751726	NM_001035305	URI1	chr18	0.00409564	1.22249	0.752315
12817890	ENSBTAT00000013144	ECI1	chr25	0.00465245	1.22498	0.770536
12855433	NM_001037614	UBE2H	chr4	0.0425995	1.22725	0.797352
12772652	NM_001191382	DVL2	chr19	0.0128546	1.22898	0.752977
12703901	ENSBTAT00000016033	GGTA1	chr11	0.0293857	1.22977	0.784903
12854164	NM_001104979	MKRN1	chr4	0.0119915	1.23534	0.736004
12907867	NM_001192236	DLG3	chrX	0.0203272	1.23571	0.818149
12753634	ENSBTAT00000032535	CTU2	chr18	0.0437388	1.23729	0.819114
12873825	NM_001192190	BOD1L	chr6	0.0113809	1.23807	0.81096
12777819	ENSBTAT00000053554	CIR1	chr2	0.0454916	1.23902	0.88403
12679191	NM_001075259	PDCD10	chr1	0.0391268	1.24434	0.841659
12908759	ENSBTAT00000018367	LOC523454	chrX	0.0396967	1.25231	0.850462
12906339	NM_001102553	NKRF	chrX	0.0347527	1.25492	0.714297
12847012	NM_001079615	TIPRL	chr3	0.0226151	1.25504	0.869191
12683672	NM_001113745	DNAJC13	chr1	0.0289873	1.25633	0.951357
12700322	NM_001035322	DQX1	chr11	0.0298017	1.26304	0.783786
[truncated: 104 more rows]

## Sheet: DKK1 effects in females
Probeset ID	Gene Accession	Gene Symbol	Chromosome	P value trt	P value interaction	Fold Fem DKK-Fem Con	Fold Male DKK-Male Con
[truncated: 131 more rows]

[truncated: 3 more sheets: DKK1 effects in males, Genes regulated DKK1 both sexes, Dictionary]
